# Supplementary material for: Co-regulation of Nr1d1 and Pparα in age-related changes of lipid metabolism and its modulation by calorie restriction
Source: publisher site journal article supplement (doi:10.18632/aging.206289), 2025-07-28
Supplement: Supplementary file [file aging-v17-206289-supplementary-material-SD1.pdf]

## SUPPLEMENTARY FIGURE

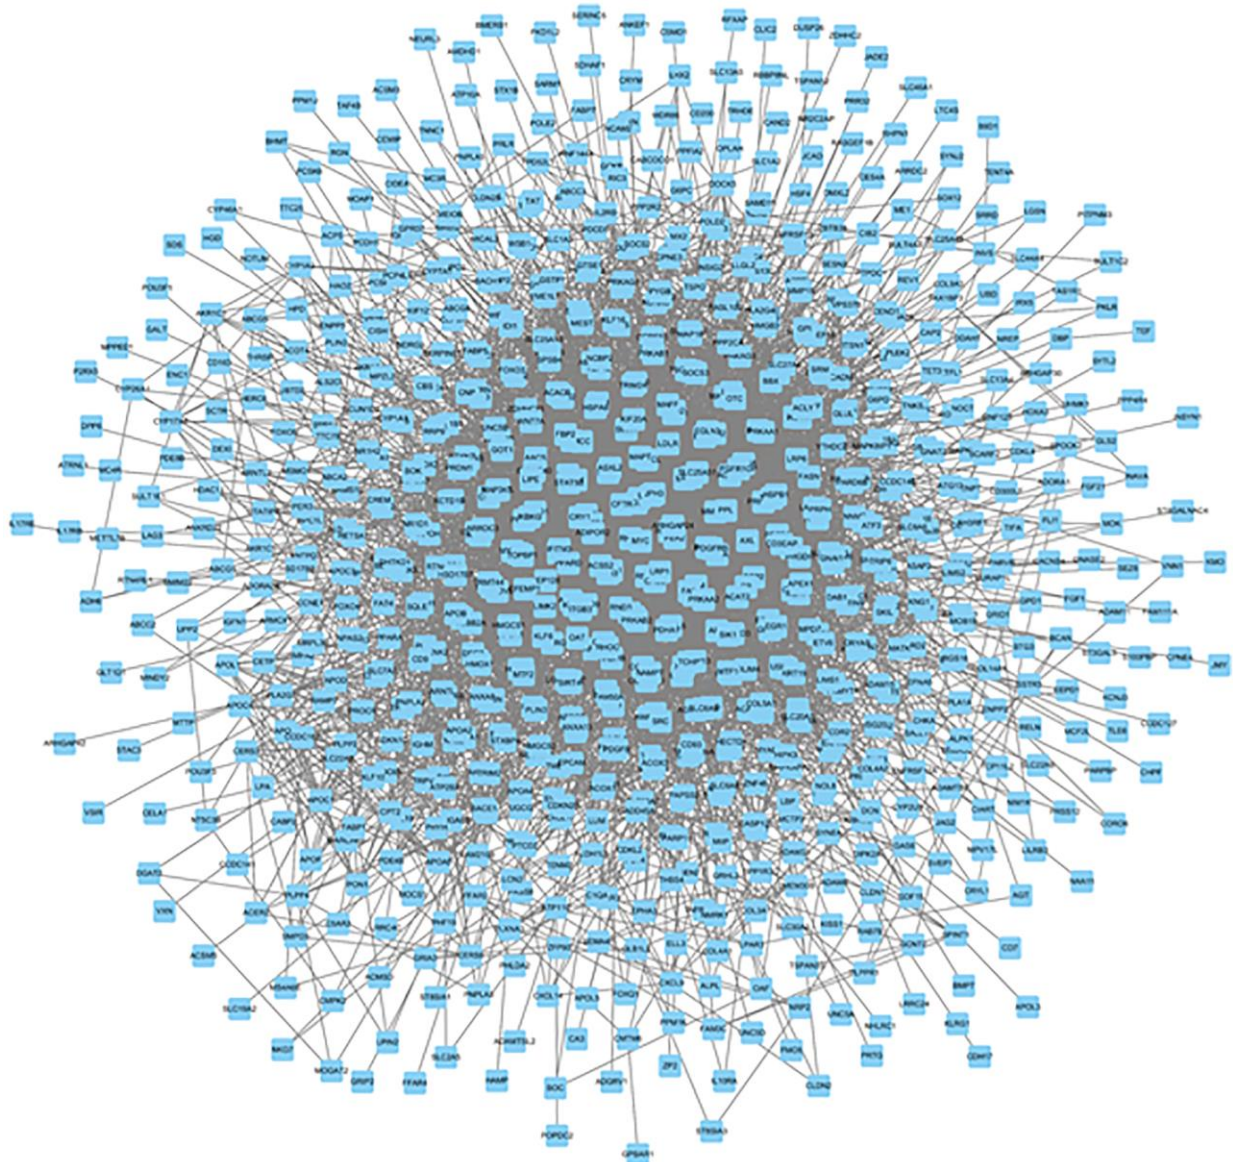

Supplementary Figure 1. PPI network constructed using genes related to the circadian rhythm and lipid metabolism and age-affected DEGs.
