# Supplementary material for: Co-regulation of Nr1d1 and Pparα in age-related changes of lipid metabolism and its modulation by calorie restriction
Source: Aging (Albany NY). 2025 Jul 28;17(7):1810–33. doi: 10.18632/aging.206289 (PMC12339034; doi:10.18632/aging.206289)
Supplement: Supplementary Table 1 [file aging-17-206289-s002.xlsx]

## Sheet: Old vs Young
Supplementary Table 1. DEGs from the Old vs. Young and Old-CR vs. Old datasets.
Gene	Desc	FC	p-value	q-value	Old TPM	Young TPM
Moap1	modulator of apoptosis 1 [Source:RGD Symbol;Acc:1307230]	209.383	6.3e-27	1.5e-23	8.22	0
Cdh13	cadherin 13 [Source:RGD Symbol;Acc:619745]	194.012	8.1e-34	3.3e-30	6.87	0.04
Dcun1d2	defective in cullin neddylation 1 domain containing 2 [Source:RGD Symbol;Acc:1582994]	132.514	2.2e-22	2.9e-19	3.36	0
LOC108348072	class II histocompatibility antigen, M alpha chain [Source:RGD Symbol;Acc:11505944]	89.8845	2.6e-15	1.5e-12	6.66	0.13
Hmgb3	high mobility group box 3 [Source:RGD Symbol;Acc:1564407]	60.1295	1.1e-13	5.6e-11	2.89	0
Nupr1l1	nuclear protein, transcriptional regulator, 1-like 1 [Source:RGD Symbol;Acc:9125019]	55.7152	6.2e-13	2.8e-10	7.77	0
NEWGENE_1559832	ring finger protein, LIM domain interacting [Source:RGD Symbol;Acc:11393862]	49.8665	5.1e-12	2.1e-09	1.58	0
Tox3	TOX high mobility group box family member 3 [Source:RGD Symbol;Acc:1311529]	49.18	2.4e-15	1.5e-12	2.09	0.04
Igfn1	immunoglobulin-like and fibronectin type III domain containing 1 [Source:RGD Symbol;Acc:1565384]	48.8403	3.3e-26	6.6e-23	2.21	0.05
Sbk1	SH3 domain binding kinase 1 [Source:RGD Symbol;Acc:628713]	48.1679	1.1e-11	4.3e-09	0.77	0
MGC94199	similar to RIKEN cDNA 2610301B20; EST AI428449 [Source:RGD Symbol;Acc:1549749]	47.1766	1.6e-11	5.8e-09	1.64	0
LOC102549408	uncharacterized LOC102549408 [Source:RGD Symbol;Acc:7563702]	36.7583	1.2e-09	3e-07	1.1	0
Akr1b7	aldo-keto reductase family 1, member B7 [Source:RGD Symbol;Acc:620257]	35.261	5.7e-20	4.8e-17	9.23	0.26
AABR07058158.1	\N	35.0174	3.8e-08	7e-06	3.57	0.17
Cyp1a1	cytochrome P450, family 1, subfamily a, polypeptide 1 [Source:RGD Symbol;Acc:2458]	33.1285	1.2e-14	6.8e-12	2.58	0.08
AABR07011057.2	\N	31.3414	2e-07	3.1e-05	1.05	0.03
LOC108348082	dual specificity mitogen-activated protein kinase kinase 3-like [Source:RGD Symbol;Acc:11389050]	31.3414	6.7e-27	1.5e-23	13.09	0.42
Ms4a6e	membrane spanning 4-domains A6E [Source:RGD Symbol;Acc:6486317]	30.4844	2.4e-08	4.5e-06	1.62	0
Zfp7	zinc finger protein 7 [Source:RGD Symbol;Acc:1310636]	20.1122	4.3e-05	0.0034	0.85	0.03
Ciart	circadian associated repressor of transcription [Source:RGD Symbol;Acc:1566380]	20.1122	7.9e-10	2.1e-07	3.15	0.16
AABR07008439.1	RAN binding protein 3-like [Source:NCBI gene;Acc:294789]	20.1122	4.4e-06	0.00047	0.68	0
Abcc3	ATP binding cassette subfamily C member 3 [Source:RGD Symbol;Acc:71101]	18.6357	6.8e-21	7.3e-18	4.38	0.21
Snrpn	small nuclear ribonucleoprotein polypeptide N [Source:RGD Symbol;Acc:621306]	18.3792	1.2e-05	0.0011	0.92	0
Olfr1442	olfactory receptor 1442 [Source:MGI Symbol;Acc:MGI:3031276]	17.8766	1.9e-07	2.9e-05	3.11	0.17
LOC108348083	delta-1-pyrroline-5-carboxylate synthase [Source:RGD Symbol;Acc:11512751]	17.5087	0.00018	0.011	0.34	0.01
Syne4	spectrin repeat containing nuclear envelope family member 4 [Source:RGD Symbol;Acc:1304580]	16.5642	3.5e-05	0.0029	1.3	0
Syt2	synaptotagmin 2 [Source:RGD Symbol;Acc:3804]	16.5642	3.5e-05	0.0029	0.36	0
LOC691254	hypothetical protein LOC691254 [Source:RGD Symbol;Acc:1586256]	16.5642	3.5e-05	0.0029	0.65	0
LOC108348098	breast cancer metastasis-suppressor 1 homolog [Source:RGD Symbol;Acc:11501278]	15.6707	6e-05	0.0046	1.87	0
Ankef1	ankyrin repeat and EF-hand domain containing 1 [Source:RGD Symbol;Acc:1304809]	15.6707	1.4e-06	0.00017	0.68	0.04
Cxcl1	C-X-C motif chemokine ligand 1 [Source:RGD Symbol;Acc:619869]	15.2422	8.9e-16	6.5e-13	14.82	0.97
Hmg1l1	high-mobility group (nonhistone chromosomal) protein 1-like 1 [Source:RGD Symbol;Acc:1587112]	14.8254	0.0001	0.0075	0.91	0
Ankrd6	ankyrin repeat domain 6 [Source:RGD Symbol;Acc:1583731]	14.8254	0.0008	0.038	0.21	0.01
Adam8	ADAM metallopeptidase domain 8 [Source:RGD Symbol;Acc:1566394]	14.2215	1e-22	1.5e-19	18.04	1.26
Ky	kyphoscoliosis peptidase [Source:RGD Symbol;Acc:1305407]	14.2215	1.1e-08	2.3e-06	0.68	0.05
AABR07060610.1	\N	13.9288	0.00018	0.011	3.31	0
LOC100909548	cation-dependent mannose-6-phosphate receptor-like [Source:RGD Symbol;Acc:6502964]	13.9288	0.00018	0.011	1.07	0
Pla2g7	phospholipase A2 group VII [Source:RGD Symbol;Acc:1310734]	13.9288	0.00018	0.011	0.57	0
RGD1563354	RIKEN cDNA D630003M21 gene [Source:MGI Symbol;Acc:MGI:3606579]	13.9288	0.00018	0.011	0.23	0
Armcx1	armadillo repeat containing, X-linked 1 [Source:RGD Symbol;Acc:1561629]	13.9288	0.00018	0.011	0.58	0
Elavl2	ELAV like RNA binding protein 2 [Source:RGD Symbol;Acc:628611]	13.9288	0.00018	0.011	0.26	0
Hmgn5	high mobility group nucleosome binding domain 5 [Source:RGD Symbol;Acc:6497694]	13.9288	0.00018	0.011	0.5	0
LOC100912282	calcium-binding and coiled-coil domain-containing protein 1-like [Source:RGD Symbol;Acc:6488185]	13.0864	0.00031	0.018	0.28	0
Zfp791	zinc finger protein 791 [Source:RGD Symbol;Acc:2323544]	13.0864	0.0022	0.084	0.48	0.04
Foxq1	forkhead box Q1 [Source:RGD Symbol;Acc:621572]	13.0864	0.0022	0.084	0.58	0.04
Dbp	D-box binding PAR bZIP transcription factor [Source:RGD Symbol;Acc:2491]	12.5533	2.6e-23	4.1e-20	80.81	6.17
Zfp260	zinc finger protein 260 [Source:RGD Symbol;Acc:621205]	12.2101	0.00055	0.028	0.56	0
P2rx5	purinergic receptor P2X 5 [Source:RGD Symbol;Acc:620256]	12.2101	0.0037	0.12	0.33	0.03
AABR07034750.1	\N	12.2101	0.00055	0.028	0.15	0
Boc	BOC cell adhesion associated, oncogene regulated [Source:RGD Symbol;Acc:1304550]	12.2101	0.00055	0.028	0.19	0
Rgs16	regulator of G-protein signaling 16 [Source:RGD Symbol;Acc:1589741]	11.6318	2.4e-21	2.7e-18	29.58	2.53
Sult4a1	sulfotransferase family 4A, member 1 [Source:RGD Symbol;Acc:69292]	11.4716	3.7e-09	8.6e-07	2.16	0.19
Mup4	major urinary protein 4 [Source:RGD Symbol;Acc:735211]	11.3137	0.00098	0.044	1.06	0
Kiaa0408L	Kiaa0408-like [Source:RGD Symbol;Acc:1307525]	11.3137	0.0061	0.18	0.18	0.02
Caln1	calneuron 1 [Source:RGD Symbol;Acc:1305843]	11.3137	0.0061	0.18	1.25	0.11
Zp2	zona pellucida glycoprotein 2 [Source:RGD Symbol;Acc:620605]	10.4831	0.01	0.27	0.34	0.03
Plpp4	phospholipid phosphatase 4 [Source:RGD Symbol;Acc:1306289]	10.4831	0.0018	0.07	0.64	0
Cftr	CF transmembrane conductance regulator [Source:RGD Symbol;Acc:2332]	10.4831	0.01	0.27	0.1	0.01
LOC100911837	protein HIRA-like [Source:RGD Symbol;Acc:6490647]	10.4831	0.0018	0.07	0.14	0
LOC100361866	eosinophil cationic protein-like [Source:RGD Symbol;Acc:2319312]	10.4831	0.0018	0.07	1.33	0
Cdkn1c	cyclin-dependent kinase inhibitor 1C [Source:RGD Symbol;Acc:727892]	9.57983	1.5e-08	3e-06	2.47	0.26
LOC100911104	lymphocyte antigen 6B-like [Source:RGD Symbol;Acc:6495044]	9.57983	0.0032	0.11	0.89	0
Grid1	glutamate ionotropic receptor delta type subunit 1 [Source:RGD Symbol;Acc:68366]	9.57983	0.017	0.36	0.24	0.02
Col9a3	collagen type IX alpha 3 chain [Source:RGD Symbol;Acc:1310255]	9.57983	0.0032	0.11	0.33	0
Prdm1	PR/SET domain 1 [Source:RGD Symbol;Acc:1311765]	9.57983	0.017	0.36	0.12	0.01
AABR07013931.3	\N	9.57983	0.0032	0.11	1.21	0
Cyp46a1	cytochrome P450, family 46, subfamily a, polypeptide 1 [Source:RGD Symbol;Acc:1306605]	9.57983	0.017	0.36	0.27	0.03
Rpl39	ribosomal protein L39 [Source:RGD Symbol;Acc:3593]	9.57983	0.017	0.36	5.7	0.82
Thbs4	thrombospondin 4 [Source:RGD Symbol;Acc:62046]	9.51366	4.6e-09	1e-06	1.69	0.18
LOC103694855	hemoglobin subunit beta-2-like [Source:RGD Symbol;Acc:9285450]	9.44794	1.3e-10	4.2e-08	14.02	1.47
Fbp2	fructose-bisphosphatase 2 [Source:RGD Symbol;Acc:620930]	9.31787	3.1e-05	0.0026	1.57	0.17
Prlr	prolactin receptor [Source:RGD Symbol;Acc:3407]	9.25351	1.1e-13	5.6e-11	9.23	1.01
Map1b	microtubule-associated protein 1B [Source:RGD Symbol;Acc:3043]	9.06307	1.8e-15	1.2e-12	1.9	0.21
Pnpla5	patatin-like phospholipase domain containing 5 [Source:RGD Symbol;Acc:1307495]	8.9383	2e-15	1.3e-12	11.9	1.32
LOC103689999	saccharopine dehydrogenase-like oxidoreductase [Source:RGD Symbol;Acc:9250610]	8.9383	1.3e-18	1.1e-15	57.34	6.39
Entpd7	ectonucleoside triphosphate diphosphohydrolase 7 [Source:RGD Symbol;Acc:1310638]	8.75435	0.029	0.5	0.7	0.07
LOC108348050	ubiquitin carboxyl-terminal hydrolase 25-like [Source:RGD Symbol;Acc:11392568]	8.75435	0.0058	0.17	1	0
AABR07030823.1	\N	8.75435	0.0058	0.17	0.36	0
AABR07050652.1	\N	8.75435	6.8e-05	0.0052	1.82	0.21
Clec4a3	C-type lectin domain family 4, member A3 [Source:RGD Symbol;Acc:1359528]	8.75435	0.029	0.5	0.97	0.11
Pou3f3	POU class 3 homeobox 3 [Source:RGD Symbol;Acc:619768]	8.75435	0.00084	0.04	0.44	0.04
Susd4	sushi domain containing 4 [Source:RGD Symbol;Acc:1564043]	8.75435	0.0058	0.17	0.2	0
LOC103689943	meiosis arrest female protein 1-like [Source:RGD Symbol;Acc:9219913]	8.69388	3.2e-11	1.2e-08	1.19	0.37
Lcn2	lipocalin 2 [Source:RGD Symbol;Acc:69408]	8.51496	3.9e-13	1.8e-10	19.88	2.32
Ppm1j	protein phosphatase, Mg2+/Mn2+ dependent, 1J [Source:RGD Symbol;Acc:1359104]	8.45614	0.0001	0.0074	0.82	0.1
LOC100361492	cytochrome P450, family 2, subfamily c, polypeptide 55-like [Source:RGD Symbol;Acc:2320073]	8.33973	1.9e-09	4.6e-07	4.6	0.55
LOC691695	similar to granzyme C [Source:RGD Symbol;Acc:1597199]	7.83536	0.0058	0.17	0.64	0
Ptgs2	prostaglandin-endoperoxide synthase 2 [Source:RGD Symbol;Acc:620349]	7.83536	0.029	0.5	0.12	0.01
AABR07044820.1	\N	7.83536	0.0058	0.17	1.52	0
Hoxa3	homeobox A3 [Source:RGD Symbol;Acc:1561431]	7.83536	0.0058	0.17	0.33	0
Sdhaf1	succinate dehydrogenase complex assembly factor 1 [Source:RGD Symbol;Acc:1562079]	7.83536	0.0058	0.17	3.67	0.1
AABR07015881.1	\N	7.83536	0.0058	0.17	0.8	0
Cand2	cullin-associated and neddylation-dissociated 2 (putative) [Source:RGD Symbol;Acc:620480]	7.83536	0.029	0.5	0.12	0.02
Pou3f1	POU class 3 homeobox 1 [Source:RGD Symbol;Acc:619767]	7.83536	0.029	0.5	0.18	0.02
Hebp2	heme binding protein 2 [Source:RGD Symbol;Acc:1311553]	7.83536	0.0058	0.17	0.53	0
Arl5c	ADP-ribosylation factor like GTPase 5C [Source:RGD Symbol;Acc:1563128]	7.83536	0.029	0.5	0.4	0.05
Lrrc24	leucine rich repeat containing 24 [Source:RGD Symbol;Acc:1308720]	7.83536	0.029	0.5	0.29	0.04
Rbbp8nl	RBBP8 N-terminal like [Source:RGD Symbol;Acc:1596090]	7.4127	4.4e-07	6.2e-05	0.76	0.1
Pitpnm3	PITPNM family member 3 [Source:RGD Symbol;Acc:1308200]	7.4127	0.0033	0.12	0.14	0.02
Oasl	2'-5'-oligoadenylate synthetase-like [Source:RGD Symbol;Acc:1308586]	7.3615	1.4e-11	5.5e-09	4.93	0.66
Lum	lumican [Source:RGD Symbol;Acc:620984]	6.9644	0.0003	0.017	0.97	0.14
LOC103689983	hypoxanthine-guanine phosphoribosyltransferase [Source:RGD Symbol;Acc:9163824]	6.9644	0.011	0.27	0.96	0
Cyp1b1	cytochrome P450, family 1, subfamily b, polypeptide 1 [Source:RGD Symbol;Acc:2460]	6.9644	0.049	0.67	0.12	0.02
AC114233.1	\N	6.9644	0.049	0.67	1.04	0.15
Pole2	DNA polymerase epsilon 2, accessory subunit [Source:RGD Symbol;Acc:1311962]	6.9644	0.011	0.27	0.3	0
Cacnb4	calcium voltage-gated channel auxiliary subunit beta 4 [Source:RGD Symbol;Acc:68385]	6.9644	0.011	0.27	0.12	0
Spns3	sphingolipid transporter 3 [Source:RGD Symbol;Acc:1561884]	6.9644	0.011	0.27	0.27	0
Sema4f	ssemaphorin 4F [Source:RGD Symbol;Acc:3658]	6.9644	0.011	0.27	0.12	0
Ankrd22	ankyrin repeat domain 22 [Source:RGD Symbol;Acc:1307862]	6.9644	0.011	0.27	0.26	0
AABR07024463.1	\N	6.9644	0.011	0.27	0.14	0
Sult1d1	sulfotransferase family 1D, member 1 [Source:RGD Symbol;Acc:620491]	6.9644	0.049	0.67	0.19	0.03
Cd52	CD52 molecule [Source:RGD Symbol;Acc:620627]	6.9644	0.049	0.67	1.4	0.2
Rgs14	regulator of G-protein signaling 14 [Source:RGD Symbol;Acc:620003]	6.9644	0.049	0.67	0.17	0.02
Cldn6	claudin 6 [Source:RGD Symbol;Acc:1308837]	6.9644	0.011	0.27	0.33	0
AC130970.1	\N	6.9644	0.049	0.67	0.34	0.05
Mtf1	metal-regulatory transcription factor 1 [Source:RGD Symbol;Acc:1308956]	6.86852	4.7e-06	0.0005	0.74	0.11
Adgrg2	adhesion G protein-coupled receptor G2 [Source:RGD Symbol;Acc:628618]	6.54322	9.2e-08	1.5e-05	1.14	0.17
Bok	BCL2 family apoptosis regulator BOK [Source:RGD Symbol;Acc:70984]	6.54322	0.00062	0.031	1.39	0.27
Wnt7a	Wnt family member 7A [Source:RGD Symbol;Acc:69079]	6.54322	0.0083	0.23	0.28	0.04
Prr32	proline rich 32 [Source:RGD Symbol;Acc:1583341]	6.49802	2.3e-09	5.6e-07	9.22	1.41
Spsb4	splA/ryanodine receptor domain and SOCS box containing 4 [Source:RGD Symbol;Acc:1562307]	6.32033	2.4e-06	0.00027	1.39	0.22
Syt15	synaptotagmin 15 [Source:RGD Symbol;Acc:727964]	6.32033	2.4e-06	0.00027	0.93	0.15
Per3	period circadian regulator 3 [Source:RGD Symbol;Acc:621581]	6.19026	2.3e-12	9.6e-10	7.25	1.58
LOC102549542	elongation of very long chain fatty acids protein 6-like [Source:RGD Symbol;Acc:7527008]	6.19026	1e-08	2.1e-06	3.24	0.53
Pnpla3	patatin-like phospholipase domain containing 3 [Source:RGD Symbol;Acc:1595843]	6.10504	4.3e-14	2.3e-11	39.5	6.42
Podnl1	podocan-like 1 [Source:RGD Symbol;Acc:1307753]	6.10504	0.02	0.39	0.17	0
Bcan	brevican [Source:RGD Symbol;Acc:2194]	6.10504	0.02	0.39	0.13	0
Slc22a12	solute carrier family 22 member 12 [Source:RGD Symbol;Acc:621628]	6.10504	0.02	0.39	0.18	0
Tex36	testis expressed 36 [Source:RGD Symbol;Acc:1566410]	6.10504	6.5e-08	1.1e-05	10.27	1.67
Cap2	cyclase associated actin cytoskeleton regulatory protein 2 [Source:RGD Symbol;Acc:620310]	6.10504	0.02	0.39	0.27	0
Tex49	testis expressed 49 [Source:RGD Symbol;Acc:1305928]	6.10504	0.02	0.39	1.24	0
RGD1359634	similar to RIKEN cDNA 1700088E04 [Source:RGD Symbol;Acc:1359634]	6.10504	0.02	0.39	0.88	0
AABR07049329.1	\N	6.10504	0.02	0.39	1.51	0
Tnnc1	troponin C1, slow skeletal and cardiac type [Source:RGD Symbol;Acc:1309921]	6.10504	0.02	0.39	0.63	0
Romo1	reactive oxygen species modulator 1 [Source:RGD Symbol;Acc:1587111]	6.10504	0.02	0.39	10.3	0
Bhlhe41	basic helix-loop-helix family, member e41 [Source:RGD Symbol;Acc:70900]	6.10504	0.02	0.39	0.39	0
Irx5	iroquois homeobox 5 [Source:RGD Symbol;Acc:1565518]	5.93809	6.8e-06	0.0007	2.26	0.36
Unc5a	unc-5 netrin receptor A [Source:RGD Symbol;Acc:621755]	5.93809	0.00039	0.021	0.75	0.13
Dusp13	dual specificity phosphatase 13 [Source:RGD Symbol;Acc:1359712]	5.81589	0.0028	0.1	0.55	0.1
Prom1	prominin 1 [Source:RGD Symbol;Acc:69367]	5.81589	0.0028	0.1	0.32	0.05
Anxa8	annexin A8 [Source:RGD Symbol;Acc:1307719]	5.42642	2.4e-07	3.6e-05	3.58	0.66
Optc	opticin [Source:RGD Symbol;Acc:1304916]	5.42642	0.0011	0.047	1.51	0.26
Aldh1a1	aldehyde dehydrogenase 1 family, member A1 [Source:RGD Symbol;Acc:2087]	5.31474	6.9e-13	3.1e-10	234.36	43.9
Igfbp2	insulin-like growth factor binding protein 2 [Source:RGD Symbol;Acc:2873]	5.27803	4.4e-10	1.3e-07	16.78	3.17
Ccdc113	coiled-coil domain containing 113 [Source:RGD Symbol;Acc:1565763]	5.24157	0.033	0.54	0.72	0.14
Cyp4a2	cytochrome P450, family 4, subfamily a, polypeptide 2 [Source:RGD Symbol;Acc:2479]	5.24157	9e-13	3.9e-10	380.84	72.11
Rassf10	Ras association domain family member 10 [Source:RGD Symbol;Acc:1309847]	5.24157	0.037	0.56	0.25	0
Svop	SV2 related protein [Source:RGD Symbol;Acc:620277]	5.24157	0.037	0.56	0.17	0
Grip2	glutamate receptor interacting protein 2 [Source:RGD Symbol;Acc:621668]	5.24157	0.037	0.56	0.07	0
Zfp583	zinc finger protein 583 [Source:RGD Symbol;Acc:1562044]	5.24157	0.037	0.56	0.16	0
Mmrn1	multimerin 1 [Source:RGD Symbol;Acc:1587248]	5.24157	0.033	0.54	0.15	0.03
Slitrk5	SLIT and NTRK-like family, member 5 [Source:RGD Symbol;Acc:1310957]	5.24157	0.037	0.56	0.07	0
Angpt2	angiopoietin 2 [Source:RGD Symbol;Acc:621861]	5.24157	0.037	0.56	0.15	0
Jph3	junctophilin 3 [Source:RGD Symbol;Acc:1308416]	5.24157	0.037	0.56	0.1	0
Prdm6	PR/SET domain 6 [Source:RGD Symbol;Acc:1559594]	5.24157	0.037	0.56	0.21	0
P3h2	prolyl 3-hydroxylase 2 [Source:RGD Symbol;Acc:1304568]	5.24157	0.0064	0.19	0.52	0.1
Tlr11	toll-like receptor 11 [Source:RGD Symbol;Acc:1564460]	5.24157	0.037	0.56	0.11	0
AABR07005779.5	\N	5.24157	0.037	0.56	0.14	0
Svep1	sushi, von Willebrand factor type A, EGF and pentraxin domain containing 1 [Source:RGD Symbol;Acc:1588987]	5.24157	0.033	0.54	0.06	0.01
AABR07027872.1	\N	5.24157	0.033	0.54	0.64	0.12
Ntrk2	neurotrophic receptor tyrosine kinase 2 [Source:RGD Symbol;Acc:3213]	5.24157	0.037	0.56	0.05	0
Kcnma1	potassium calcium-activated channel subfamily M alpha 1 [Source:RGD Symbol;Acc:620715]	5.24157	0.037	0.56	0.09	0
Wfikkn2	WAP, follistatin/kazal, immunoglobulin, kunitz and netrin domain containing 2 [Source:RGD Symbol;Acc:1305361]	5.16941	1.2e-05	0.0011	1.16	0.22
Psat1	phosphoserine aminotransferase 1 [Source:RGD Symbol;Acc:735170]	5.09824	7.1e-07	9.4e-05	3.13	0.61
Trpm4	transient receptor potential cation channel, subfamily M, member 4 [Source:RGD Symbol;Acc:620244]	5.02805	5.2e-08	9.2e-06	1.83	0.36
Glb1l2	galactosidase, beta 1-like 2 [Source:RGD Symbol;Acc:1564436]	5.02805	0.0023	0.086	0.57	0.11
Pdlim4	PDZ and LIM domain 4 [Source:RGD Symbol;Acc:3575]	4.82323	3.8e-07	5.5e-05	7.25	1.5
Sntb1	syntrophin, beta 1 [Source:RGD Symbol;Acc:1307728]	4.78991	0.00026	0.016	0.81	0.17
LOC100361547	Cytochrome P450, family 2, subfamily c, polypeptide 7-like [Source:RGD Symbol;Acc:2319920]	4.75683	2.6e-06	0.0003	4.87	1.02
Unc5cl	unc-5 family C-terminal like [Source:RGD Symbol;Acc:1587368]	4.75683	1.7e-10	5.5e-08	12.42	2.65
Gsn	gelsolin [Source:RGD Symbol;Acc:1303089]	4.72397	3.1e-09	7.3e-07	8.05	1.67
Nipa1	NIPA magnesium transporter 1 [Source:RGD Symbol;Acc:1305401]	4.72397	0.0042	0.14	0.91	0.19
AC114460.1	\N	4.65893	0.015	0.33	1.52	0.33
LOC100910838	neuronal tyrosine-phosphorylated phosphoinositide-3-kinase adapter 1-like [Source:RGD Symbol;Acc:6496186]	4.65893	0.0017	0.069	0.48	0.1
Rasl10b	RAS-like, family 10, member B [Source:RGD Symbol;Acc:1310873]	4.62675	0.00075	0.036	0.88	0.19
Arhgef16	Rho guanine nucleotide exchange factor 16 [Source:RGD Symbol;Acc:1588981]	4.59479	0.00035	0.019	0.55	0.12
Rfxap	regulatory factor X-associated protein [Source:RGD Symbol;Acc:1565351]	4.59479	9.3e-08	1.5e-05	7.08	1.53
Cabcoco1	ciliary associated calcium binding coiled-coil 1 [Source:RGD Symbol;Acc:1306739]	4.50023	0.0023	0.089	1.59	0.35
Pdcd5	programmed cell death 5 [Source:RGD Symbol;Acc:1310561]	4.46915	4.6e-07	6.5e-05	17.81	3.97
LOC103689977	caspase-6 [Source:RGD Symbol;Acc:9205219]	4.37717	0.00021	0.013	2.26	0.37
MGC105649	hypothetical LOC302884 [Source:RGD Symbol;Acc:1359583]	4.37717	0.023	0.42	0.88	0.2
Ctsw	cathepsin W [Source:RGD Symbol;Acc:1309354]	4.37717	0.023	0.42	0.66	0.15
Tcp11x2	t-complex 11 family, X-linked 2 [Source:RGD Symbol;Acc:1598081]	4.37717	0.0073	0.21	1.04	0.24
LOC102550456	TSC22 domain family protein 4-like [Source:RGD Symbol;Acc:7605479]	4.37717	0.0032	0.11	0.76	0.17
Kiss1	KiSS-1 metastasis-suppressor [Source:RGD Symbol;Acc:727850]	4.37717	0.023	0.42	1.56	0.49
Sctr	secretin receptor [Source:RGD Symbol;Acc:621342]	4.37717	0.0059	0.18	0.88	0.2
Fgf21	fibroblast growth factor 21 [Source:RGD Symbol;Acc:620175]	4.31691	6.8e-07	9.2e-05	20.44	4.73
Egr1	early growth response 1 [Source:RGD Symbol;Acc:2544]	4.28709	3.2e-07	4.7e-05	3.32	0.77
Tbcb	tubulin folding cofactor B [Source:RGD Symbol;Acc:1309965]	4.28709	7.9e-08	1.3e-05	15.24	3.55
Gimap7	GTPase, IMAP family member 7 [Source:RGD Symbol;Acc:1565750]	4.14106	0.011	0.27	0.99	0.24
Maff	MAF bZIP transcription factor F [Source:RGD Symbol;Acc:1309531]	4.11246	0.0025	0.095	1.05	0.25
Tle6	TLE family member 6, subcortical maternal complex member [Source:RGD Symbol;Acc:1561530]	4.08405	0.034	0.55	0.43	0.1
Tmem30b	transmembrane protein 30B [Source:RGD Symbol;Acc:1308732]	4.08405	4.3e-06	0.00047	2.24	0.54
Cldn23	claudin 23 [Source:RGD Symbol;Acc:1309001]	4.08405	0.034	0.55	0.51	0.12
Btg3	BTG anti-proliferation factor 3 [Source:RGD Symbol;Acc:2226]	4.08405	3.1e-05	0.0026	4.16	1.02
Gstm3l	glutathione S-transferase mu 3-like [Source:RGD Symbol;Acc:620381]	4.02782	3e-07	4.4e-05	28.13	6.97
Dcn	decorin [Source:RGD Symbol;Acc:61895]	4	7e-07	9.4e-05	6.09	1.52
Map3k6	mitogen-activated protein kinase kinase kinase 6 [Source:RGD Symbol;Acc:1304625]	4	0.0035	0.12	0.42	0.11
Aacs	acetoacetyl-CoA synthetase [Source:RGD Symbol;Acc:708522]	3.97237	3.3e-08	6.2e-06	9.34	2.35
Ubd	ubiquitin D [Source:RGD Symbol;Acc:69418]	3.94493	6e-09	1.3e-06	165.25	41.88
Cux2	cut-like homeobox 2 [Source:RGD Symbol;Acc:1305967]	3.91768	6.2e-06	0.00064	1.46	0.37
Nkg7	natural killer cell granule protein 7 [Source:RGD Symbol;Acc:621523]	3.91768	0.0085	0.23	2.23	0.56
Gem	GTP binding protein overexpressed in skeletal muscle [Source:RGD Symbol;Acc:1307386]	3.91768	0.016	0.34	0.7	0.18
Nr4a1	nuclear receptor subfamily 4, group A, member 1 [Source:RGD Symbol;Acc:620029]	3.91768	0.016	0.34	0.43	0.11
Nol8	nucleolar protein 8 [Source:RGD Symbol;Acc:1309551]	3.91768	0.00013	0.0091	1.09	0.19
Coro6	coronin 6 [Source:RGD Symbol;Acc:708560]	3.89062	0.00019	0.012	1.55	0.37
Nupr1	nuclear protein 1, transcriptional regulator [Source:RGD Symbol;Acc:69363]	3.86375	4.6e-09	1e-06	476.3	123.07
Anxa13	annexin A13 [Source:RGD Symbol;Acc:1307545]	3.86375	0.0047	0.15	1.22	0.31
Pdgfb	platelet derived growth factor subunit B [Source:RGD Symbol;Acc:3283]	3.78423	0.0085	0.23	0.72	0.19
Cyp26a1	cytochrome P450, family 26, subfamily a, polypeptide 1 [Source:RGD Symbol;Acc:620161]	3.78423	4.5e-05	0.0035	3.15	0.83
Cdkl2	cyclin dependent kinase like 2 [Source:RGD Symbol;Acc:1309625]	3.75809	0.0013	0.056	0.74	0.21
Cdkn2b	cyclin-dependent kinase inhibitor 2B [Source:RGD Symbol;Acc:2324]	3.75809	0.0003	0.017	1.77	0.47
LOC100361636	vasculin-like protein 1-like [Source:RGD Symbol;Acc:2319736]	3.70635	0.023	0.43	0.41	0.11
Rpl36al	ribosomal protein L36a-like [Source:RGD Symbol;Acc:621156]	3.70635	0.023	0.43	8.81	2.36
Irf7	interferon regulatory factor 7 [Source:RGD Symbol;Acc:1307828]	3.65533	1.2e-07	1.9e-05	18.47	5.04
AC123494.1	\N	3.63008	0.012	0.28	0.44	0.12
Arrdc3	arrestin domain containing 3 [Source:RGD Symbol;Acc:1359478]	3.605	5.7e-07	7.9e-05	11.95	3.29
Csmd1	CUB and Sushi multiple domains 1 [Source:RGD Symbol;Acc:1305103]	3.5801	2e-06	0.00024	1.14	0.32
Tpd52l1	TPD52 like 1 [Source:RGD Symbol;Acc:1594796]	3.5801	4.2e-07	6.1e-05	22.1	6.07
Elf3	E74 like ETS transcription factor 3 [Source:RGD Symbol;Acc:1310687]	3.5801	0.0029	0.1	1.1	0.31
Trpv4	transient receptor potential cation channel, subfamily V, member 4 [Source:RGD Symbol;Acc:69337]	3.5801	0.0014	0.059	0.82	0.23
Zbtb16	zinc finger and BTB domain containing 16 [Source:RGD Symbol;Acc:727921]	3.55537	7.3e-06	0.00074	3.61	1.01
Gsta3	glutathione S-transferase alpha 3 [Source:RGD Symbol;Acc:1591980]	3.55537	5.1e-08	9.2e-06	138.81	37.85
Popdc2	popeye domain containing 2 [Source:RGD Symbol;Acc:735226]	3.50642	9.2e-06	0.00091	4.28	1.21
Efemp1	EGF containing fibulin extracellular matrix protein 1 [Source:RGD Symbol;Acc:1308528]	3.4822	0.012	0.28	0.83	0.24
Rhpn1	rhophilin, Rho GTPase binding protein 1 [Source:RGD Symbol;Acc:1305688]	3.4822	0.0018	0.073	3.16	1.34
Ccl21	C-C motif chemokine ligand 21 [Source:RGD Symbol;Acc:1311996]	3.4822	7.7e-06	0.00077	15.83	4.54
Slit3	slit guidance ligand 3 [Source:RGD Symbol;Acc:69311]	3.4822	0.034	0.54	0.16	0.04
Ccne1	cyclin E1 [Source:RGD Symbol;Acc:2294]	3.4822	0.032	0.53	0.63	0.18
RT1-DOb	RT1 class II, locus DOb [Source:RGD Symbol;Acc:1595814]	3.4822	0.034	0.54	1.08	0.29
AABR07044362.1	\N	3.4822	0.0038	0.13	2.16	0.61
Cd7	Cd7 molecule [Source:RGD Symbol;Acc:1310015]	3.4822	0.0065	0.19	2.2	0.63
Slc25a51	solute carrier family 25, member 51 [Source:RGD Symbol;Acc:6502452]	3.4822	0.0065	0.19	0.91	0.25
Gadd45b	growth arrest and DNA-damage-inducible, beta [Source:RGD Symbol;Acc:1309080]	3.4822	2.6e-05	0.0023	6.47	1.84
Tlcd1	TLC domain containing 1 [Source:RGD Symbol;Acc:1359195]	3.4822	0.0001	0.0073	1.21	0.35
Epha3	Eph receptor A3 [Source:RGD Symbol;Acc:68389]	3.43426	1.5e-06	0.00018	2.92	0.85
RGD1565355	similar to fatty acid translocase/CD36 [Source:RGD Symbol;Acc:1565355]	3.43426	2e-06	0.00024	6.98	2.1
Prss8	serine protease 8 [Source:RGD Symbol;Acc:619973]	3.43426	0.00056	0.028	1.62	0.47
Rtn4	reticulon 4 [Source:RGD Symbol;Acc:620989]	3.43426	9.5e-06	0.00094	5.04	2.19
Adamdec1	ADAM-like, decysin 1 [Source:RGD Symbol;Acc:1309861]	3.41054	1.1e-06	0.00014	9.05	2.63
Ncbp2	nuclear cap binding protein subunit 2 [Source:RGD Symbol;Acc:1596188]	3.41054	0.0015	0.062	10.16	2.94
Gtse1	G-2 and S-phase expressed 1 [Source:RGD Symbol;Acc:1563164]	3.38698	9.2e-05	0.0067	2.19	0.64
Bcl2a1	BCL2-related protein A1 [Source:RGD Symbol;Acc:620621]	3.38698	0.0087	0.24	2.75	0.81
Slc30a3	solute carrier family 30 member 3 [Source:RGD Symbol;Acc:1359689]	3.36359	0.00023	0.014	2.54	0.75
LOC292543	similar to solute carrier family 7 (cationic amino acid transporter, y+ system), member 3 [Source:RGD Symbol;Acc:1565097]	3.36359	0.016	0.34	0.65	0.19
Tmod1	tropomodulin 1 [Source:RGD Symbol;Acc:3874]	3.34035	0.022	0.42	0.54	0.16
Rab7b	Rab7b, member RAS oncogene family [Source:RGD Symbol;Acc:1562617]	3.34035	0.022	0.42	0.53	0.16
Phgdh	phosphoglycerate dehydrogenase [Source:RGD Symbol;Acc:61987]	3.34035	0.00015	0.01	3.04	0.9
Matk	megakaryocyte-associated tyrosine kinase [Source:RGD Symbol;Acc:69058]	3.34035	0.022	0.42	0.89	0.26
Adora1	adenosine A1 receptor [Source:RGD Symbol;Acc:2048]	3.31728	2.9e-05	0.0025	3.2	0.96
Cxcl14	C-X-C motif chemokine ligand 14 [Source:RGD Symbol;Acc:1307406]	3.31728	1.1e-05	0.0011	7.45	2.24
Lgals5	lectin, galactose binding, soluble 5 [Source:RGD Symbol;Acc:3004]	3.31728	0.044	0.64	1.51	0.45
Ppl	periplakin [Source:RGD Symbol;Acc:1305511]	3.29436	9.1e-05	0.0067	0.92	0.28
Ighm	immunoglobulin heavy constant mu [Source:MGI Symbol;Acc:MGI:96448]	3.24901	4.4e-07	6.2e-05	57.3	17.67
Fut4	fucosyltransferase 4 [Source:RGD Symbol;Acc:619954]	3.24901	0.021	0.41	0.38	0.12
Grhl2	grainyhead-like transcription factor 2 [Source:RGD Symbol;Acc:1561191]	3.24901	0.0013	0.055	0.55	0.17
AABR07018269.2	\N	3.22657	2.8e-05	0.0024	6.96	2.14
Serpina7	serpin family A member 7 [Source:RGD Symbol;Acc:619833]	3.18215	1.1e-06	0.00014	28.96	8.96
Mybl2	MYB proto-oncogene like 2 [Source:RGD Symbol;Acc:1308474]	3.16017	0.015	0.34	0.45	0.14
Myo7b	myosin VIIb [Source:RGD Symbol;Acc:1561153]	3.13834	1.1e-06	0.00013	9.17	2.91
Il15	interleukin 15 [Source:RGD Symbol;Acc:2887]	3.13834	0.033	0.54	3.63	1.15
Resp18	regulated endocrine-specific protein 18 [Source:RGD Symbol;Acc:3555]	3.11666	0.00043	0.023	8.94	2.76
Gnai1	G protein subunit alpha i1 [Source:RGD Symbol;Acc:2713]	3.11666	0.021	0.41	1.1	0.35
LOC100911672	atrophin-1-like [Source:RGD Symbol;Acc:6491795]	3.09513	0.0051	0.16	0.64	0.21
Slc2a5	solute carrier family 2 member 5 [Source:RGD Symbol;Acc:68328]	3.07375	1.2e-05	0.0011	7.91	2.56
Scd2	stearoyl-Coenzyme A desaturase 2 [Source:RGD Symbol;Acc:621177]	3.05252	3.3e-05	0.0028	2.33	0.76
Slc25a34	solute carrier family 25, member 34 [Source:RGD Symbol;Acc:1359157]	3.05252	0.02	0.4	1.4	0.46
Spint1	serine peptidase inhibitor, Kunitz type 1 [Source:RGD Symbol;Acc:1303138]	3.05252	0.041	0.61	0.55	0.18
Zfp605	zinc finger protein 605 [Source:RGD Symbol;Acc:2318406]	3.05252	0.0086	0.24	0.63	0.21
Atf3	activating transcription factor 3 [Source:RGD Symbol;Acc:2165]	3.03143	0.00081	0.038	2.31	0.78
Mmd	monocyte to macrophage differentiation-associated [Source:RGD Symbol;Acc:1592079]	3.01049	0.015	0.33	0.7	0.23
Cd63	Cd63 molecule [Source:RGD Symbol;Acc:62080]	3.01049	2.7e-06	0.0003	84.26	27.98
AA926063	AA926063gene [Source:RGD Symbol;Acc:1303072]	2.9897	0.00097	0.044	4.92	1.74
Naa11	N(alpha)-acetyltransferase 11, NatA catalytic subunit [Source:RGD Symbol;Acc:1564723]	2.9897	0.029	0.5	0.44	0.14
AABR07053681.1	\N	2.9897	0.0052	0.16	0.63	0.21
Spink1	serine peptidase inhibitor, Kazal type 1 [Source:RGD Symbol;Acc:3749]	2.96905	4.9e-05	0.0039	26.29	8.83
Fbln1	fibulin 1 [Source:RGD Symbol;Acc:1308667]	2.96905	0.047	0.65	0.39	0.12
Akr1b8	aldo-keto reductase family 1, member B8 [Source:RGD Symbol;Acc:708475]	2.96905	0.047	0.65	1.13	0.33
Gimap8	GTPase, IMAP family member 8 [Source:RGD Symbol;Acc:1564570]	2.96905	0.047	0.65	0.29	0.1
Fkbp5	FKBP prolyl isomerase 5 [Source:RGD Symbol;Acc:1309155]	2.96905	4.4e-06	0.00047	12.34	4.13
Mybl1	MYB proto-oncogene like 1 [Source:RGD Symbol;Acc:1306940]	2.92817	6.1e-06	0.00064	8.09	2.75
Rhoc	ras homolog family member C [Source:RGD Symbol;Acc:1304965]	2.90795	1.2e-05	0.0011	25.26	8.76
LOC108348128	nesprin-4 [Source:RGD Symbol;Acc:11504732]	2.90795	5.9e-05	0.0045	10.14	2.55
Cpne4	copine 4 [Source:RGD Symbol;Acc:1308844]	2.86791	0.0052	0.16	0.64	0.22
Il17rb	interleukin 17 receptor B [Source:RGD Symbol;Acc:1311392]	2.8481	1.1e-05	0.0011	16.67	5.76
Unc5b	unc-5 netrin receptor B [Source:RGD Symbol;Acc:621756]	2.8481	3.4e-05	0.0028	3.11	1.08
MGC114492	similar to melanoma antigen family A, 5 [Source:RGD Symbol;Acc:1561901]	2.8481	0.0028	0.1	2.8	0.98
Nmrk1	nicotinamide riboside kinase 1 [Source:RGD Symbol;Acc:1564687]	2.82843	0.00057	0.029	3.61	1.27
Aurkc	aurora kinase C [Source:RGD Symbol;Acc:1309573]	2.82843	0.0034	0.12	3.19	1.12
Mx2	MX dynamin like GTPase 2 [Source:RGD Symbol;Acc:628821]	2.82843	2.1e-05	0.0019	10.03	3.53
AABR07060872.1	\N	2.82843	6.7e-06	0.00069	186.49	65.76
Pkd1l2	polycystin 1 like 2 [Source:RGD Symbol;Acc:1588631]	2.82843	0.00056	0.028	0.82	0.29
Ell3	elongation factor for RNA polymerase II 3 [Source:RGD Symbol;Acc:1309917]	2.82843	0.0084	0.23	1.51	0.53
Hsd17b2	hydroxysteroid (17-beta) dehydrogenase 2 [Source:RGD Symbol;Acc:621803]	2.80889	4.7e-06	0.0005	510.84	181.3
Thrsp	thyroid hormone responsive [Source:RGD Symbol;Acc:3859]	2.80889	4.4e-06	0.00047	938.1	332.34
Plxna3	plexin A3 [Source:RGD Symbol;Acc:1584973]	2.78949	0.0024	0.09	0.51	0.18
Cd9	CD9 molecule [Source:RGD Symbol;Acc:2318]	2.77022	0.0034	0.12	2.94	1.06
Jag2	jagged canonical Notch ligand 2 [Source:RGD Symbol;Acc:2938]	2.77022	0.0034	0.12	0.68	0.25
Lss	lanosterol synthase [Source:RGD Symbol;Acc:620955]	2.75108	1e-05	0.00098	46.68	11.99
Cmpk2	cytidine/uridine monophosphate kinase 2 [Source:RGD Symbol;Acc:1305881]	2.75108	0.0083	0.23	0.62	0.22
Dusp26	dual specificity phosphatase 26 [Source:RGD Symbol;Acc:1310090]	2.73208	0.0011	0.047	3.81	1.39
Ric3	RIC3 acetylcholine receptor chaperone [Source:RGD Symbol;Acc:1588939]	2.73208	0.036	0.56	0.37	0.13
LOC102556337	mitochondrial fission factor-like [Source:RGD Symbol;Acc:7706142]	2.73208	0.0064	0.19	4.94	1.57
LOC100912538	centrin-3-like [Source:RGD Symbol;Acc:6486167]	2.71321	0.00062	0.031	7.96	2.95
Glt1d1	glycosyltransferase 1 domain containing 1 [Source:RGD Symbol;Acc:1304896]	2.71321	0.00014	0.0095	4.37	1.6
Kifc3	kinesin family member C3 [Source:RGD Symbol;Acc:1307693]	2.71321	7.8e-05	0.0058	5.19	1.9
Spp1	secreted phosphoprotein 1 [Source:RGD Symbol;Acc:3752]	2.71321	0.034	0.54	1.24	0.46
Card14	caspase recruitment domain family, member 14 [Source:RGD Symbol;Acc:1591135]	2.69447	0.018	0.38	0.67	0.25
Tex13b	testis expressed 13B [Source:RGD Symbol;Acc:1587018]	2.69447	0.00025	0.015	4.09	1.51
Cryab	crystallin, alpha B [Source:RGD Symbol;Acc:2414]	2.69447	0.00012	0.0085	12.79	4.72
Src	SRC proto-oncogene, non-receptor tyrosine kinase [Source:RGD Symbol;Acc:620795]	2.67586	0.00023	0.014	3.23	1.17
Sbspon	somatomedin B and thrombospondin, type 1 domain containing [Source:RGD Symbol;Acc:1559717]	2.67586	0.0051	0.16	2.86	1.07
Krt19	keratin 19 [Source:RGD Symbol;Acc:619936]	2.67586	0.0016	0.064	3.89	1.44
Vxn	vexin [Source:RGD Symbol;Acc:1561849]	2.62079	5.3e-05	0.0041	10.13	3.84
Ttc25	tetratricopeptide repeat domain 25 [Source:RGD Symbol;Acc:1311859]	2.62079	0.001	0.047	3.04	1.15
Plek2	pleckstrin 2 [Source:RGD Symbol;Acc:1305786]	2.62079	0.006	0.18	1.22	0.46
Klf6	Kruppel-like factor 6 [Source:RGD Symbol;Acc:62389]	2.62079	0.01	0.26	3.29	1.37
Zfp184	zinc finger protein 184 [Source:RGD Symbol;Acc:1304798]	2.62079	0.0029	0.1	2.37	0.84
Sidt1	SID1 transmembrane family, member 1 [Source:RGD Symbol;Acc:1559616]	2.62079	0.017	0.36	0.35	0.13
Cyp17a1	cytochrome P450, family 17, subfamily a, polypeptide 1 [Source:RGD Symbol;Acc:2456]	2.60268	0.00012	0.0084	11.42	4.38
RGD1559459	similar to Expressed sequence AI788959 [Source:RGD Symbol;Acc:1559459]	2.60268	0.0015	0.061	4	1.53
Trim24	tripartite motif-containing 24 [Source:RGD Symbol;Acc:1560596]	2.56685	0.009	0.24	1.22	0.47
AABR07034739.1	Ig lambda-2 chain C region [Source:UniProtKB/Swiss-Prot;Acc:P20767]	2.56685	0.0097	0.26	26.08	10.22
Socs3	suppressor of cytokine signaling 3 [Source:RGD Symbol;Acc:621087]	2.56685	0.012	0.29	3.73	1.45
Mindy2	MINDY lysine 48 deubiquitinase 2 [Source:RGD Symbol;Acc:1311456]	2.56685	0.0077	0.22	1.42	0.55
Agtpbp1	ATP/GTP binding protein 1 [Source:RGD Symbol;Acc:1306307]	2.56685	0.012	0.29	0.56	0.22
Mok	MOK protein kinase [Source:RGD Symbol;Acc:1309274]	2.54912	0.0041	0.13	2.72	1.06
B9d1	B9 domain containing 1 [Source:RGD Symbol;Acc:1305522]	2.54912	0.0012	0.052	10.16	3.94
Chpf	chondroitin polymerizing factor [Source:RGD Symbol;Acc:1359458]	2.54912	0.0041	0.13	1.42	0.55
Phlda2	pleckstrin homology-like domain, family A, member 2 [Source:RGD Symbol;Acc:1304755]	2.54912	0.022	0.42	2.73	1.07
Phf19	PHD finger protein 19 [Source:RGD Symbol;Acc:1310390]	2.54912	8.2e-05	0.0062	8.7	3.38
Cemip	cell migration inducing hyaluronidase [Source:RGD Symbol;Acc:1305254]	2.54912	0.017	0.35	0.31	0.12
Taf4b	TATA-box binding protein associated factor 4b [Source:RGD Symbol;Acc:1562997]	2.54912	0.017	0.35	0.56	0.22
Aldh1a7	aldehyde dehydrogenase family 1, subfamily A7 [Source:RGD Symbol;Acc:620252]	2.53151	0.00022	0.013	12.75	5.01
Mapt	microtubule-associated protein tau [Source:RGD Symbol;Acc:69329]	2.53151	0.00043	0.023	2.41	0.9
Ccl19	C-C motif chemokine ligand 19 [Source:RGD Symbol;Acc:1310336]	2.53151	0.041	0.6	2.91	1.15
Galr3	galanin receptor 3 [Source:RGD Symbol;Acc:2658]	2.53151	0.041	0.6	1.68	0.66
Nr1d1	nuclear receptor subfamily 1, group D, member 1 [Source:RGD Symbol;Acc:628827]	2.51403	5.3e-05	0.0041	45	17.78
Ces2c	carboxylesterase 2C [Source:RGD Symbol;Acc:621510]	2.51403	0.00011	0.0078	20.97	8.33
Zfp90	zinc finger protein 90 [Source:RGD Symbol;Acc:1563077]	2.46229	0.012	0.28	1.47	0.6
Clic2	chloride intracellular channel 2 [Source:RGD Symbol;Acc:1306580]	2.44528	0.0002	0.012	23.49	9.56
Pla1a	phospholipase A1 member A [Source:RGD Symbol;Acc:621261]	2.44528	0.00062	0.031	7.6	3.1
Nrp2	neuropilin 2 [Source:RGD Symbol;Acc:621442]	2.44528	0.00042	0.023	2.29	0.93
Slc44a4	solute carrier family 44, member 4 [Source:RGD Symbol;Acc:1303167]	2.44528	0.0029	0.1	2.64	1.08
Enpp5	ectonucleotide pyrophosphatase/phosphodiesterase family member 5 [Source:RGD Symbol;Acc:1359199]	2.44528	0.0015	0.061	3.89	1.58
Synj2	synaptojanin 2 [Source:RGD Symbol;Acc:69436]	2.44528	0.01	0.27	0.67	0.27
AABR07041096.1	\N	2.42839	0.02	0.4	0.52	0.21
Smim22	small integral membrane protein 22 [Source:RGD Symbol;Acc:1563547]	2.42839	0.013	0.3	6.8	2.78
AABR07048992.1	\N	2.42839	0.0011	0.05	4.45	1.83
Junb	JunB proto-oncogene, AP-1 transcription factor subunit [Source:RGD Symbol;Acc:2944]	2.41162	0.00016	0.011	27.11	11.19
Pcbp3	poly(rC) binding protein 3 [Source:RGD Symbol;Acc:1307430]	2.41162	0.014	0.32	1.4	0.58
Svbp	small vasohibin binding protein [Source:RGD Symbol;Acc:1311232]	2.41162	0.026	0.47	4.44	1.83
Ankrd12	ankyrin repeat domain 12 [Source:RGD Symbol;Acc:1310118]	2.41162	0.00055	0.028	1.48	0.61
Kif12	kinesin family member 12 [Source:RGD Symbol;Acc:1308487]	2.39496	0.0079	0.22	1.58	0.66
Nab2	Ngfi-A binding protein 2 [Source:RGD Symbol;Acc:1311712]	2.39496	0.00081	0.038	2.12	0.88
Enc1	ectodermal-neural cortex 1 [Source:RGD Symbol;Acc:1303152]	2.39496	0.00018	0.011	10.16	4.21
Parvb	parvin, beta [Source:RGD Symbol;Acc:1311485]	2.37841	0.00031	0.018	7.67	3.2
Ythdc2	YTH domain containing 2 [Source:RGD Symbol;Acc:1563192]	2.36199	0.025	0.45	0.57	0.24
RT1-Ba	RT1 class II, locus Ba [Source:RGD Symbol;Acc:1595867]	2.36199	0.0025	0.093	7.74	3.27
Map3k5	mitogen-activated protein kinase kinase kinase 5 [Source:RGD Symbol;Acc:1306565]	2.34567	0.0013	0.054	2.53	1.07
Ubtd2	ubiquitin domain containing 2 [Source:RGD Symbol;Acc:1305506]	2.34567	0.0058	0.17	1.91	0.81
Mtss1	MTSS I-BAR domain containing 1 [Source:RGD Symbol;Acc:1309883]	2.34567	0.00015	0.0099	43.49	18.57
Lgals3	galectin 3 [Source:RGD Symbol;Acc:69356]	2.32947	0.0028	0.1	8.61	3.67
Atg16l2	autophagy related 16-like 2 [Source:RGD Symbol;Acc:1311400]	2.32947	0.0005	0.026	12.25	5.24
Casp12	caspase 12 [Source:RGD Symbol;Acc:621758]	2.32947	0.00082	0.039	13.27	5.69
Nhp2	NHP2 ribonucleoprotein [Source:RGD Symbol;Acc:1309435]	2.32947	0.011	0.27	7.84	3.4
Tmem106a	transmembrane protein 106A [Source:RGD Symbol;Acc:1309043]	2.2974	0.0017	0.07	4.41	1.91
Gstp1	glutathione S-transferase pi 1 [Source:RGD Symbol;Acc:2758]	2.2974	0.0013	0.055	22.71	9.85
Myadm	myeloid-associated differentiation marker [Source:RGD Symbol;Acc:727835]	2.2974	0.00041	0.022	12.9	5.59
Cnp	2',3'-cyclic nucleotide 3' phosphodiesterase [Source:RGD Symbol;Acc:2368]	2.28153	0.00063	0.031	10.53	4.58
Nek8	NIMA-related kinase 8 [Source:RGD Symbol;Acc:1306897]	2.28153	0.01	0.27	1.55	0.67
AC118165.1	\N	2.28153	0.02	0.4	1.99	0.87
LOC103689947	selenium-binding protein 1 [Source:RGD Symbol;Acc:9292945]	2.28153	0.02	0.4	1.43	0.61
Nrg1	neuregulin 1 [Source:RGD Symbol;Acc:621341]	2.28153	0.0038	0.13	2.22	0.96
Wee1	WEE1 G2 checkpoint kinase [Source:RGD Symbol;Acc:1307895]	2.26577	0.021	0.41	0.93	0.41
Wfdc21	WAP four-disulfide core domain 21 [Source:RGD Symbol;Acc:1303147]	2.26577	0.00046	0.024	264.94	117.44
Sall1	spalt-like transcription factor 1 [Source:RGD Symbol;Acc:1309916]	2.26577	0.00032	0.018	21.76	9.56
Sema3c	semaphorin 3C [Source:RGD Symbol;Acc:1309343]	2.26577	0.026	0.47	0.49	0.22
Gas6	growth arrest specific 6 [Source:RGD Symbol;Acc:61913]	2.25012	0.0003	0.017	101.02	46.8
Kng1	kininogen 1 [Source:RGD Symbol;Acc:1359376]	2.25012	0.00028	0.016	1617.78	711.05
Cdr2	cerebellar degeneration-related protein 2 [Source:RGD Symbol;Acc:1310578]	2.25012	0.039	0.58	0.92	0.41
Slc20a1	solute carrier family 20 member 1 [Source:RGD Symbol;Acc:621079]	2.25012	0.00043	0.023	16.82	7.41
Vnn1	vanin 1 [Source:RGD Symbol;Acc:1310075]	2.25012	0.00099	0.045	8.15	3.59
Gria3	glutamate ionotropic receptor AMPA type subunit 3 [Source:RGD Symbol;Acc:70958]	2.23457	0.0012	0.051	3.26	1.45
Neurl3	neuralized E3 ubiquitin protein ligase 3 [Source:RGD Symbol;Acc:1359633]	2.23457	0.0057	0.17	5.02	2.23
Bex3	brain expressed X-linked 3 [Source:RGD Symbol;Acc:3148]	2.23457	0.025	0.45	4.59	2.05
Usp2	ubiquitin specific peptidase 2 [Source:RGD Symbol;Acc:621073]	2.21914	0.0019	0.075	9.98	4.36
Fam49a	family with sequence similarity 49, member A [Source:RGD Symbol;Acc:1305961]	2.21914	0.00084	0.039	5.4	2.43
Klf16	Kruppel-like factor 16 [Source:RGD Symbol;Acc:1305966]	2.21914	0.0018	0.071	5.44	2.44
Egln3	egl-9 family hypoxia-inducible factor 3 [Source:RGD Symbol;Acc:71019]	2.21914	0.036	0.56	0.8	0.36
Fasn	fatty acid synthase [Source:RGD Symbol;Acc:620665]	2.20381	0.00042	0.023	54.65	24.71
Rhof	ras homolog family member F, filopodia associated [Source:RGD Symbol;Acc:1584038]	2.20381	0.032	0.53	1.13	0.51
Acsm5	acyl-CoA synthetase medium-chain family member 5 [Source:RGD Symbol;Acc:1309578]	2.20381	0.00055	0.028	28.14	12.68
Pter	phosphotriesterase related [Source:RGD Symbol;Acc:61313]	2.20381	0.0023	0.089	5.99	2.71
AABR07031491.2	\N	2.18859	0.0011	0.048	12.19	5.52
Arhgap30	Rho GTPase activating protein 30 [Source:RGD Symbol;Acc:1561419]	2.18859	0.048	0.66	0.55	0.25
Foxp2	forkhead box P2 [Source:RGD Symbol;Acc:1559697]	2.18859	0.048	0.66	0.29	0.13
Pcsk4	proprotein convertase subtilisin/kexin type 4 [Source:RGD Symbol;Acc:620325]	2.18859	0.016	0.35	1.6	0.73
Cep128	centrosomal protein 128 [Source:RGD Symbol;Acc:1595693]	2.18859	0.034	0.54	1.81	0.79
LOC100909912	uncharacterized LOC100909912 [Source:RGD Symbol;Acc:6500902]	2.18859	0.034	0.54	1.33	0.61
NEWGENE_1562258	INO80 complex subunit B [Source:RGD Symbol;Acc:9421107]	2.17347	0.01	0.27	5.52	2.53
Gadd45a	growth arrest and DNA-damage-inducible, alpha [Source:RGD Symbol;Acc:2654]	2.17347	0.001	0.047	29.23	13.41
Impa2	inositol monophosphatase 2 [Source:RGD Symbol;Acc:628692]	2.17347	0.0013	0.055	19.67	8.99
Cd3eap	CD3e molecule associated protein [Source:RGD Symbol;Acc:1591707]	2.17347	0.012	0.29	2.31	1.06
Htatip2	HIV-1 Tat interactive protein 2 [Source:RGD Symbol;Acc:1309941]	2.15846	0.0021	0.082	13.64	6.31
Sstr3	somatostatin receptor 3 [Source:RGD Symbol;Acc:620308]	2.15846	0.0024	0.09	3.79	1.75
Atp6v1d	ATPase H+ transporting V1 subunit D [Source:RGD Symbol;Acc:735119]	2.15846	0.00085	0.04	45.12	20.74
Il2rb	interleukin 2 receptor subunit beta [Source:RGD Symbol;Acc:2896]	2.15846	0.039	0.58	0.95	0.44
Hmgcr	3-hydroxy-3-methylglutaryl-CoA reductase [Source:RGD Symbol;Acc:2803]	2.15846	0.00063	0.031	30.26	13.91
Bmp7	bone morphogenetic protein 7 [Source:RGD Symbol;Acc:620743]	2.14355	0.0029	0.1	6.32	2.93
Cidea	cell death-inducing DFFA-like effector a [Source:RGD Symbol;Acc:1305106]	2.14355	0.0081	0.22	18.82	8.76
Emcn	endomucin [Source:RGD Symbol;Acc:1303218]	2.12874	0.023	0.43	2.85	1.33
Lrrc75b	leucine rich repeat containing 75B [Source:RGD Symbol;Acc:2318441]	2.12874	0.041	0.61	0.49	0.23
C5ar2	complement component 5a receptor 2 [Source:RGD Symbol;Acc:1303027]	2.11404	0.01	0.27	5.12	2.42
Fas	Fas cell surface death receptor [Source:RGD Symbol;Acc:619831]	2.11404	0.0033	0.12	5.27	2.48
LOC100360380	zinc finger protein 457-like [Source:RGD Symbol;Acc:2322273]	2.11404	0.029	0.5	2.07	1
RT1-N3	RT1 class Ib, locus N3 [Source:RGD Symbol;Acc:1598370]	2.11404	0.0027	0.1	9.79	4.62
Cgref1	cell growth regulator with EF hand domain 1 [Source:RGD Symbol;Acc:620801]	2.09943	0.039	0.58	2.01	0.95
Cyp2c6v1	cytochrome P450, family 2, subfamily C, polypeptide 6, variant 1 [Source:RGD Symbol;Acc:619934]	2.09943	0.00087	0.04	2400.07	1118.57
Pold2	DNA polymerase delta 2, accessory subunit [Source:RGD Symbol;Acc:1304954]	2.09943	0.021	0.41	2.65	1.25
Herc6	HECT and RLD domain containing E3 ubiquitin protein ligase family member 6 [Source:RGD Symbol;Acc:1561739]	2.09943	0.0045	0.15	3.08	1.46
Specc1	sperm antigen with calponin homology and coiled-coil domains 1 [Source:RGD Symbol;Acc:1309718]	2.09943	0.016	0.34	1.03	0.47
Ca6	carbonic anhydrase 6 [Source:RGD Symbol;Acc:70516]	2.08493	0.019	0.38	3.73	1.78
Trim80	tripartite motif protein 80 [Source:RGD Symbol;Acc:1311352]	2.08493	0.0088	0.24	3.5	1.67
Mvd	mevalonate diphosphate decarboxylase [Source:RGD Symbol;Acc:621292]	2.08493	0.0016	0.067	22.73	10.83
Isg15	ISG15 ubiquitin-like modifier [Source:RGD Symbol;Acc:1310312]	2.08493	0.0038	0.13	12.37	5.91
Isg20	interferon stimulated exonuclease gene 20 [Source:RGD Symbol;Acc:1306407]	2.08493	0.018	0.38	6.9	3.3
Ccdc141	coiled-coil domain containing 141 [Source:RGD Symbol;Acc:1593250]	2.07053	0.034	0.54	0.42	0.2
Oasl2	2'-5' oligoadenylate synthetase-like 2 [Source:RGD Symbol;Acc:1307351]	2.07053	0.013	0.31	2.02	0.97
Arhgef3	Rho guanine nucleotide exchange factor 3 [Source:RGD Symbol;Acc:1310672]	2.07053	0.0075	0.21	2.35	1.14
Mt-nd6	mitochondrially encoded NADH dehydrogenase 6 [Source:RGD Symbol;Acc:620561]	2.05623	0.0021	0.081	101.96	49.39
Tef	TEF transcription factor, PAR bZIP family member [Source:RGD Symbol;Acc:3841]	2.05623	0.0018	0.071	13.51	6.55
Rev1	REV1, DNA directed polymerase [Source:RGD Symbol;Acc:1306715]	2.05623	0.0024	0.091	6.09	2.94
Ccdc120	coiled-coil domain containing 120 [Source:RGD Symbol;Acc:1561596]	2.05623	0.0045	0.15	3.32	1.6
Hltf	helicase-like transcription factor [Source:RGD Symbol;Acc:1309031]	2.05623	0.015	0.33	1.13	0.55
Gpi	glucose-6-phosphate isomerase [Source:RGD Symbol;Acc:2727]	2.05623	0.0013	0.054	97.2	46.91
Cercam	cerebral endothelial cell adhesion molecule [Source:RGD Symbol;Acc:1304778]	2.04202	0.048	0.66	1.18	0.58
Ppp2ca	protein phosphatase 2 catalytic subunit alpha [Source:RGD Symbol;Acc:3380]	2.02792	0.0035	0.12	27.14	13.35
Tnfrsf21	TNF receptor superfamily member 21 [Source:RGD Symbol;Acc:1307308]	2.02792	0.045	0.64	0.67	0.33
Lhx2	LIM homeobox 2 [Source:RGD Symbol;Acc:71076]	2.01391	0.016	0.34	3.15	1.55
Ugcg	UDP-glucose ceramide glucosyltransferase [Source:RGD Symbol;Acc:621870]	2.01391	0.0092	0.25	2.29	1.13
Acat2	acetyl-CoA acetyltransferase 2 [Source:RGD Symbol;Acc:1359366]	2.01391	0.0061	0.18	11.15	5.62
Acer2	alkaline ceramidase 2 [Source:RGD Symbol;Acc:1304629]	2.01391	0.0039	0.13	4.23	2.09
Tnfrsf12a	TNF receptor superfamily member 12A [Source:RGD Symbol;Acc:631329]	2	0.0074	0.21	14.82	7.37
Ccdc68	coiled-coil domain containing 68 [Source:RGD Symbol;Acc:1561424]	2	0.02	0.4	4.09	2.04
Inava	innate immunity activator [Source:RGD Symbol;Acc:1311892]	2	0.032	0.53	1.27	0.63
Mctp2	multiple C2 and transmembrane domain containing 2 [Source:RGD Symbol;Acc:1562967]	2	0.011	0.28	1.13	0.59
Tax1bp3	Tax1 binding protein 3 [Source:RGD Symbol;Acc:1308924]	1.98618	0.0045	0.15	20.49	10.33
LOC100360828	cAMP-regulated phosphoprotein 19-like [Source:RGD Symbol;Acc:2321330]	1.98618	0.0043	0.14	202.24	102.5
Sqle	squalene epoxidase [Source:RGD Symbol;Acc:3755]	1.98618	0.0027	0.1	28.97	14.56
B3galt1	Beta-1,3-galactosyltransferase 1 [Source:RGD Symbol;Acc:1311898]	1.98618	0.0071	0.2	4.91	2.46
Topbp1	DNA topoisomerase II binding protein 1 [Source:RGD Symbol;Acc:1562949]	1.98618	0.0053	0.17	4.13	2.07
Prkca	protein kinase C, alpha [Source:RGD Symbol;Acc:3395]	1.98618	0.02	0.4	1.51	0.78
Cryl1	crystallin, lambda 1 [Source:RGD Symbol;Acc:631427]	1.97247	0.0035	0.12	32.61	16.5
Fam111a	family with sequence similarity 111, member A [Source:RGD Symbol;Acc:1560913]	1.97247	0.0027	0.099	30.47	15.36
Fgf1	fibroblast growth factor 1 [Source:RGD Symbol;Acc:2605]	1.97247	0.0044	0.15	7.58	3.55
Nt5c3b	5'-nucleotidase, cytosolic IIIB [Source:RGD Symbol;Acc:1359229]	1.97247	0.012	0.29	7.09	3.76
Lpar3	lysophosphatidic acid receptor 3 [Source:RGD Symbol;Acc:620565]	1.97247	0.012	0.29	1.95	0.98
Gcnt2	glucosaminyl (N-acetyl) transferase 2 (I blood group) [Source:RGD Symbol;Acc:1303198]	1.95884	0.0095	0.25	2.9	1.46
Zdhhc2	zinc finger DHHC-type palmitoyltransferase 2 [Source:RGD Symbol;Acc:628681]	1.95884	0.023	0.42	3.32	1.68
Procr	protein C receptor [Source:RGD Symbol;Acc:1305991]	1.95884	0.037	0.56	2.75	1.39
Upp2	uridine phosphorylase 2 [Source:RGD Symbol;Acc:1308188]	1.95884	0.0039	0.13	16.24	8.25
Dusp7	dual specificity phosphatase 7 [Source:RGD Symbol;Acc:735026]	1.95884	0.019	0.39	2.03	1.03
Pcsk6	proprotein convertase subtilisin/kexin type 6 [Source:RGD Symbol;Acc:3246]	1.95884	0.0033	0.12	17.61	8.97
Prss36	serine protease 36 [Source:RGD Symbol;Acc:1593186]	1.94531	0.013	0.3	3.32	1.68
Ldlrad3	low density lipoprotein receptor class A domain containing 3 [Source:RGD Symbol;Acc:1307846]	1.94531	0.045	0.64	0.9	0.46
Ppp2r1b	protein phosphatase 2 scaffold subunit A beta [Source:RGD Symbol;Acc:1304764]	1.94531	0.012	0.29	2.39	1.22
Acaca	acetyl-CoA carboxylase alpha [Source:RGD Symbol;Acc:621248]	1.94531	0.0049	0.16	4.98	2.55
AC125248.1	\N	1.94531	0.0083	0.23	3.37	1.73
Kctd15	potassium channel tetramerization domain containing 15 [Source:RGD Symbol;Acc:1583737]	1.93187	0.04	0.6	1.6	0.82
Tspo	translocator protein [Source:RGD Symbol;Acc:2228]	1.91853	0.011	0.27	18.04	9.34
Plp2	proteolipid protein 2 [Source:RGD Symbol;Acc:1587363]	1.91853	0.014	0.31	10.17	5.29
Anxa2	annexin A2 [Source:RGD Symbol;Acc:621170]	1.91853	0.012	0.29	8.5	4.41
Alpl	alkaline phosphatase, biomineralization associated [Source:RGD Symbol;Acc:2100]	1.91853	0.0081	0.22	7.52	3.9
Fabp5	fatty acid binding protein 5 [Source:RGD Symbol;Acc:70997]	1.91853	0.0057	0.17	50.75	26.32
Lbp	lipopolysaccharide binding protein [Source:RGD Symbol;Acc:61865]	1.91853	0.0037	0.12	71.8	37.24
Rrp9	ribosomal RNA processing 9, U3 small nucleolar RNA binding protein [Source:RGD Symbol;Acc:1307881]	1.90528	0.013	0.31	7.04	3.67
Meox2	mesenchyme homeobox 2 [Source:RGD Symbol;Acc:3079]	1.90528	0.012	0.29	4.97	2.59
Ctdspl	CTD small phosphatase like [Source:RGD Symbol;Acc:1304841]	1.90528	0.0091	0.24	3.93	2.05
Igh-6	immunoglobulin heavy chain 6 [Source:RGD Symbol;Acc:1359202]	1.89212	0.0099	0.26	18.75	9.86
Nxn	nucleoredoxin [Source:RGD Symbol;Acc:1310489]	1.89212	0.038	0.57	3.87	2.04
Lgals3bp	galectin 3 binding protein [Source:RGD Symbol;Acc:620837]	1.87905	0.007	0.2	17.29	9.16
AABR07005844.1	\N	1.87905	0.033	0.54	3	1.59
Nr2c2ap	nuclear receptor 2C2-associated protein [Source:RGD Symbol;Acc:1561190]	1.87905	0.011	0.27	12.24	6.5
Hook2	hook microtubule-tethering protein 2 [Source:RGD Symbol;Acc:1310171]	1.87905	0.01	0.27	6.74	3.56
Ramp2	receptor activity modifying protein 2 [Source:RGD Symbol;Acc:61872]	1.87905	0.046	0.65	7.19	3.68
Nampt	nicotinamide phosphoribosyltransferase [Source:RGD Symbol;Acc:631365]	1.86607	0.0062	0.18	24.69	13.36
Pkmyt1	protein kinase, membrane associated tyrosine/threonine 1 [Source:RGD Symbol;Acc:1305434]	1.85318	0.049	0.67	1.47	0.79
Hdac11	histone deacetylase 11 [Source:RGD Symbol;Acc:1311706]	1.85318	0.0099	0.26	9.82	5.27
Fam3c	family with sequence similarity 3, member C [Source:RGD Symbol;Acc:735193]	1.85318	0.016	0.35	8.41	3.28
Gdf15	growth differentiation factor 15 [Source:RGD Symbol;Acc:2674]	1.84038	0.028	0.5	8.98	4.85
Ifrd2	interferon-related developmental regulator 2 [Source:RGD Symbol;Acc:1310222]	1.84038	0.013	0.31	9.78	5.31
Akr1c15	aldo-keto reductase family 1, member C15 [Source:RGD Symbol;Acc:1307514]	1.84038	0.035	0.55	4.98	2.7
Slc16a11	solute carrier family 16, member 11 [Source:RGD Symbol;Acc:1311125]	1.84038	0.011	0.28	11.71	6.6
Ifi47	interferon gamma inducible protein 47 [Source:RGD Symbol;Acc:708470]	1.84038	0.037	0.56	3.27	1.77
Bcl2l11	BCL2 like 11 [Source:RGD Symbol;Acc:628774]	1.84038	0.016	0.34	3.05	1.7
AABR07021930.1	\N	1.82766	0.033	0.54	5.21	2.83
App	amyloid beta precursor protein [Source:RGD Symbol;Acc:2139]	1.82766	0.0077	0.22	30.39	16.66
Lurap1l	leucine rich adaptor protein 1-like [Source:RGD Symbol;Acc:1308059]	1.82766	0.0092	0.25	46.65	25.46
Jun	Jun proto-oncogene, AP-1 transcription factor subunit [Source:RGD Symbol;Acc:2943]	1.82766	0.0078	0.22	21.94	11.91
Klf10	Kruppel-like factor 10 [Source:RGD Symbol;Acc:621652]	1.82766	0.011	0.27	9.38	5.12
Tchp	trichoplein, keratin filament binding [Source:RGD Symbol;Acc:1310813]	1.82766	0.024	0.44	3.35	1.82
LOC100910882	RNA-binding protein 39-like [Source:RGD Symbol;Acc:6496028]	1.82766	0.0092	0.25	23.73	12.92
Jade1	jade family PHD finger 1 [Source:RGD Symbol;Acc:1306920]	1.82766	0.0087	0.24	9.02	4.92
Tceal9	transcription elongation factor A like 9 [Source:RGD Symbol;Acc:1592975]	1.82766	0.036	0.56	6.6	3.61
Abhd3	abhydrolase domain containing 3 [Source:RGD Symbol;Acc:1310655]	1.81504	0.022	0.42	5.52	3.02
C12H7orf61	chromosome 12 open reading frame, human C7orf61 [Source:RGD Symbol;Acc:11442159]	1.81504	0.029	0.5	4.49	2.47
Epcam	epithelial cell adhesion molecule [Source:RGD Symbol;Acc:621365]	1.81504	0.013	0.31	13.28	7.28
Acp5	acid phosphatase 5, tartrate resistant [Source:RGD Symbol;Acc:2022]	1.81504	0.015	0.33	13.07	7.24
Fgfr1op	Fgfr1 oncogene partner [Source:RGD Symbol;Acc:1583370]	1.81504	0.021	0.41	3.32	1.82
LOC100910130	protein FAM50A-like [Source:RGD Symbol;Acc:6500228]	1.8025	0.016	0.34	15.56	8.65
Frmd4b	FERM domain containing 4B [Source:RGD Symbol;Acc:620172]	1.8025	0.014	0.32	5.49	3.04
Arrdc2	arrestin domain containing 2 [Source:RGD Symbol;Acc:1309659]	1.8025	0.025	0.45	3.88	2.14
Lztfl1	leucine zipper transcription factor-like 1 [Source:RGD Symbol;Acc:1306628]	1.8025	0.033	0.54	6.12	3.38
Gss	glutathione synthetase [Source:RGD Symbol;Acc:2752]	1.79005	0.011	0.27	41.96	23.4
Scd	stearoyl-CoA desaturase [Source:RGD Symbol;Acc:621176]	1.77769	0.0098	0.26	820.65	460.75
Acly	ATP citrate lyase [Source:RGD Symbol;Acc:2018]	1.77769	0.0095	0.25	83.13	46.47
Plin3	perilipin 3 [Source:RGD Symbol;Acc:1595854]	1.77769	0.015	0.34	21.39	11.97
Plpp2	phospholipid phosphatase 2 [Source:RGD Symbol;Acc:628893]	1.77769	0.015	0.34	16.5	9.22
Ptcd2	pentatricopeptide repeat domain 2 [Source:RGD Symbol;Acc:1310308]	1.77769	0.038	0.57	4.21	2.35
Tifa	TRAF-interacting protein with forkhead-associated domain [Source:RGD Symbol;Acc:1359151]	1.76541	0.042	0.61	4.82	2.73
Tent4a	terminal nucleotidyltransferase 4A [Source:RGD Symbol;Acc:1307356]	1.76541	0.019	0.38	5.57	3.15
Jak3	Janus kinase 3 [Source:RGD Symbol;Acc:2940]	1.76541	0.019	0.38	4.86	2.74
LOC100910438	ankyrin repeat family A protein 2-like [Source:RGD Symbol;Acc:6498684]	1.76541	0.029	0.5	5.75	3.27
Abca2	ATP binding cassette subfamily A member 2 [Source:RGD Symbol;Acc:620238]	1.76541	0.012	0.29	9.99	5.62
Hsf4	heat shock transcription factor 4 [Source:RGD Symbol;Acc:1310808]	1.76541	0.026	0.47	7.93	4.43
Ptn	pleiotrophin [Source:RGD Symbol;Acc:3444]	1.76541	0.045	0.64	5.46	3.08
Per2	period circadian regulator 2 [Source:RGD Symbol;Acc:61945]	1.75321	0.016	0.35	5.28	2.99
G6pd	glucose-6-phosphate dehydrogenase [Source:RGD Symbol;Acc:2645]	1.75321	0.018	0.38	9.51	5.39
Evc	EvC ciliary complex subunit 1 [Source:RGD Symbol;Acc:735186]	1.75321	0.028	0.5	2.82	1.6
Mmp15	matrix metallopeptidase 15 [Source:RGD Symbol;Acc:1308937]	1.75321	0.016	0.34	10.11	5.74
Srm	spermidine synthase [Source:RGD Symbol;Acc:620796]	1.75321	0.019	0.38	19.44	11.04
Limk2	LIM domain kinase 2 [Source:RGD Symbol;Acc:62056]	1.7411	0.019	0.38	6.91	3.87
Trip6	thyroid hormone receptor interactor 6 [Source:RGD Symbol;Acc:1583180]	1.7411	0.03	0.51	7.32	4.13
Bdh2	3-hydroxybutyrate dehydrogenase 2 [Source:RGD Symbol;Acc:1309898]	1.7411	0.022	0.42	18.24	10.43
Ifitm3	interferon induced transmembrane protein 3 [Source:RGD Symbol;Acc:1595844]	1.7411	0.013	0.31	287.74	164.69
Chrdl1	chordin-like 1 [Source:RGD Symbol;Acc:735215]	1.72907	0.041	0.61	1.87	1.07
AABR07018078.1	PHD finger protein 11 [Source:NCBI gene;Acc:361051]	1.72907	0.019	0.39	27	15.51
Myc	MYC proto-oncogene, bHLH transcription factor [Source:RGD Symbol;Acc:3130]	1.72907	0.019	0.38	24.85	14.17
Alpk1	alpha-kinase 1 [Source:RGD Symbol;Acc:1304613]	1.72907	0.036	0.56	1.12	0.65
Slc6a9	solute carrier family 6 member 9 [Source:RGD Symbol;Acc:621243]	1.72907	0.015	0.33	31.01	17.82
Tmco6	transmembrane and coiled-coil domains 6 [Source:RGD Symbol;Acc:1309263]	1.72907	0.037	0.56	5.45	3.15
Apex1	apurinic/apyrimidinic endodeoxyribonuclease 1 [Source:RGD Symbol;Acc:2126]	1.72907	0.023	0.43	20.55	11.81
Ttc7b	tetratricopeptide repeat domain 7B [Source:RGD Symbol;Acc:1305920]	1.71713	0.028	0.5	6.36	3.72
Oas1a	2'-5' oligoadenylate synthetase 1A [Source:RGD Symbol;Acc:621760]	1.71713	0.023	0.43	15.04	7.88
Gpr146	G protein-coupled receptor 146 [Source:RGD Symbol;Acc:1560731]	1.70527	0.022	0.42	19.86	11.59
Echdc1	ethylmalonyl-CoA decarboxylase 1 [Source:RGD Symbol;Acc:1359654]	1.70527	0.023	0.43	16.72	9.77
Cd300lf	Cd300 molecule-like family member F [Source:RGD Symbol;Acc:1309733]	1.70527	0.028	0.5	10.48	5.97
Tpm1	tropomyosin 1 [Source:RGD Symbol;Acc:3898]	1.70527	0.017	0.36	63.47	37.1
Dnase2	deoxyribonuclease 2, lysosomal [Source:RGD Symbol;Acc:621457]	1.70527	0.026	0.47	16.87	9.85
Slc6a8	solute carrier family 6 member 8 [Source:RGD Symbol;Acc:619711]	1.70527	0.047	0.65	2.19	1.28
Hmox1	heme oxygenase 1 [Source:RGD Symbol;Acc:2806]	1.69349	0.024	0.44	23.48	13.82
Adamtsl2	ADAMTS-like 2 [Source:RGD Symbol;Acc:1305459]	1.69349	0.029	0.5	5.2	3.06
Msmo1	methylsterol monooxygenase 1 [Source:RGD Symbol;Acc:620281]	1.69349	0.018	0.38	124.06	72.97
Eif2ak3	eukaryotic translation initiation factor 2 alpha kinase 3 [Source:RGD Symbol;Acc:70884]	1.69349	0.028	0.5	4.9	2.89
Eif4ebp1	eukaryotic translation initiation factor 4E binding protein 1 [Source:RGD Symbol;Acc:620259]	1.69349	0.022	0.41	66.87	39.28
Rhobtb1	Rho-related BTB domain containing 1 [Source:RGD Symbol;Acc:1306871]	1.68179	0.023	0.43	11.66	6.91
Them6	thioesterase superfamily member 6 [Source:RGD Symbol;Acc:1359378]	1.68179	0.044	0.64	7.39	4.38
Ces4a	carboxylesterase 4A [Source:RGD Symbol;Acc:1307418]	1.68179	0.029	0.5	9.68	5.73
Acot4	acyl-CoA thioesterase 4 [Source:RGD Symbol;Acc:1596753]	1.68179	0.034	0.54	6.8	4.03
Cbx3	chromobox 3 [Source:RGD Symbol;Acc:1549705]	1.68179	0.038	0.58	8.39	4.95
Mcf2l	MCF.2 cell line derived transforming sequence-like [Source:RGD Symbol;Acc:619782]	1.68179	0.045	0.64	2.15	1.26
Sh3rf1	SH3 domain containing ring finger 1 [Source:RGD Symbol;Acc:735154]	1.68179	0.048	0.66	1.91	1.13
Hspb1	heat shock protein family B (small) member 1 [Source:RGD Symbol;Acc:61306]	1.65864	0.036	0.56	26.63	15.95
Tas1r1	taste 1 receptor member 1 [Source:RGD Symbol;Acc:61891]	1.65864	0.037	0.56	7.46	4.49
Ccng1	cyclin G1 [Source:RGD Symbol;Acc:2295]	1.65864	0.026	0.47	27.33	16.53
RGD1309534	similar to RIKEN cDNA 4931406C07 [Source:RGD Symbol;Acc:1309534]	1.65864	0.025	0.45	40.52	24.36
Rnd3	Rho family GTPase 3 [Source:RGD Symbol;Acc:1359690]	1.65864	0.028	0.5	14.9	8.93
Cp	ceruloplasmin [Source:RGD Symbol;Acc:2387]	1.64718	0.024	0.44	851.66	515.22
Hsd17b7	hydroxysteroid (17-beta) dehydrogenase 7 [Source:RGD Symbol;Acc:2837]	1.64718	0.032	0.53	8.86	5.36
Dsg2	desmoglein 2 [Source:RGD Symbol;Acc:1311143]	1.64718	0.028	0.5	13.62	8.25
Mknk2	MAPK interacting serine/threonine kinase 2 [Source:RGD Symbol;Acc:1305728]	1.64718	0.024	0.44	71.16	42.85
Ppp2r2d	protein phosphatase 2, regulatory subunit B, delta [Source:RGD Symbol;Acc:708356]	1.64718	0.039	0.58	11.88	7.19
Cxcl9	C-X-C motif chemokine ligand 9 [Source:RGD Symbol;Acc:628798]	1.6358	0.034	0.54	25.95	15.76
Adh6	alcohol dehydrogenase 6 (class V) [Source:RGD Symbol;Acc:1306313]	1.6358	0.027	0.48	1190.28	722.17
Idi1	isopentenyl-diphosphate delta isomerase 1 [Source:RGD Symbol;Acc:621835]	1.6358	0.029	0.5	35.59	21.65
Pla2g15	phospholipase A2, group XV [Source:RGD Symbol;Acc:1302982]	1.6358	0.035	0.55	11.14	6.78
Mapk8ip1	mitogen-activated protein kinase 8 interacting protein 1 [Source:RGD Symbol;Acc:70937]	1.6358	0.044	0.64	5.64	3.44
Cish	cytokine inducible SH2-containing protein [Source:RGD Symbol;Acc:69261]	1.6245	0.035	0.55	11.69	7.14
AABR07016572.1	\N	1.6245	0.035	0.55	16.41	10.03
Por	cytochrome p450 oxidoreductase [Source:RGD Symbol;Acc:68335]	1.61328	0.033	0.54	84.18	52.06
Acss2	acyl-CoA synthetase short-chain family member 2 [Source:RGD Symbol;Acc:1305489]	1.61328	0.032	0.53	40.76	25.09
Asah1	N-acylsphingosine amidohydrolase 1 [Source:RGD Symbol;Acc:621568]	1.61328	0.045	0.64	9.67	6.03
Ddah1	dimethylarginine dimethylaminohydrolase 1 [Source:RGD Symbol;Acc:70968]	1.61328	0.032	0.53	42.58	26.25
Ces2e	carboxylesterase 2E [Source:RGD Symbol;Acc:621563]	1.60214	0.037	0.56	32.26	20.02
UST4r	integral membrane transport protein UST4r [Source:RGD Symbol;Acc:620976]	1.60214	0.042	0.61	24.36	15.17
Ifi27l2b	interferon, alpha-inducible protein 27 like 2B [Source:RGD Symbol;Acc:1559721]	1.60214	0.036	0.56	623.34	389.75
Cxcl11	C-X-C motif chemokine ligand 11 [Source:RGD Symbol;Acc:727827]	1.60214	0.047	0.65	16.38	10.15
Nr1d2	nuclear receptor subfamily 1, group D, member 2 [Source:RGD Symbol;Acc:628828]	1.59107	0.04	0.6	17.06	10.68
Lpin2	lipin 2 [Source:RGD Symbol;Acc:1304588]	1.59107	0.04	0.59	13.41	8.57
LOC100362027	ribosomal protein L30-like [Source:RGD Symbol;Acc:2318953]	1.59107	0.042	0.61	257.74	162.27
Bhlhe40	basic helix-loop-helix family, member e40 [Source:RGD Symbol;Acc:68439]	1.59107	0.044	0.63	18.77	11.75
Me1	malic enzyme 1 [Source:RGD Symbol;Acc:3074]	1.58008	0.044	0.64	17.62	11.56
Mpdz	multiple PDZ domain crumbs cell polarity complex component [Source:RGD Symbol;Acc:3105]	1.58008	0.047	0.66	4.47	2.81
Hspa8	heat shock protein family A (Hsp70) member 8 [Source:RGD Symbol;Acc:621725]	1.58008	0.038	0.57	305.86	192.22
Fmo5	flavin containing dimethylaniline monoxygenase 5 [Source:RGD Symbol;Acc:628602]	1.58008	0.04	0.6	65.06	40.92
Rps6	ribosomal protein S6 [Source:RGD Symbol;Acc:3602]	1.58008	0.042	0.61	186.62	117.76
Oplah	5-oxoprolinase (ATP-hydrolysing) [Source:RGD Symbol;Acc:620956]	1.56917	0.043	0.62	29.75	18.8
Acacb	acetyl-CoA carboxylase beta [Source:RGD Symbol;Acc:620500]	1.55833	0.049	0.67	16.21	10.38
Hgd	homogentisate 1, 2-dioxygenase [Source:RGD Symbol;Acc:1308757]	-1.55833	0.046	0.65	166.58	258.12
Crybg2	crystallin beta-gamma domain containing 2 [Source:RGD Symbol;Acc:1308621]	-1.55833	0.047	0.65	13.81	21.44
Cabp2	calcium binding protein 2 [Source:RGD Symbol;Acc:1563670]	-1.55833	0.047	0.65	41.86	65.13
Lims2	LIM zinc finger domain containing 2 [Source:RGD Symbol;Acc:1305273]	-1.55833	0.049	0.67	24.14	37.36
Cyp4f4	cytochrome P450, family 4, subfamily f, polypeptide 4 [Source:RGD Symbol;Acc:708363]	-1.55833	0.045	0.64	86.07	133.68
LOC100365958	Rdh2 protein-like [Source:RGD Symbol;Acc:2318031]	-1.55833	0.046	0.65	187.75	281.38
Acsm3	acyl-CoA synthetase medium-chain family member 3 [Source:RGD Symbol;Acc:62086]	-1.55833	0.047	0.65	32.17	49.96
Cyp2f4	cytochrome P450, family 2, subfamily f, polypeptide 4 [Source:RGD Symbol;Acc:2476]	-1.55833	0.048	0.66	37.6	58.32
Rmdn2	regulator of microtubule dynamics 2 [Source:RGD Symbol;Acc:1559836]	-1.56917	0.048	0.67	22.23	34.6
Kmo	kynurenine 3-monooxygenase [Source:RGD Symbol;Acc:620610]	-1.56917	0.046	0.65	32.62	50.8
Slc19a2	solute carrier family 19 member 2 [Source:RGD Symbol;Acc:1308611]	-1.56917	0.044	0.63	44.07	69.95
Aldh1l1	aldehyde dehydrogenase 1 family, member L1 [Source:RGD Symbol;Acc:621294]	-1.56917	0.044	0.64	43.69	68.03
Lrp1	LDL receptor related protein 1 [Source:RGD Symbol;Acc:1307535]	-1.56917	0.041	0.6	24.63	38.54
Clpx	caseinolytic mitochondrial matrix peptidase chaperone subunit [Source:RGD Symbol;Acc:1304883]	-1.58008	0.039	0.58	50.12	78.97
Col3a1	collagen type III alpha 1 chain [Source:RGD Symbol;Acc:71029]	-1.58008	0.042	0.61	16.58	25.99
Cyp2j10	cytochrome P450, family 2, subfamily j, polypeptide 10 [Source:RGD Symbol;Acc:1563215]	-1.58008	0.048	0.66	18.21	28.54
Pex5	peroxisomal biogenesis factor 5 [Source:RGD Symbol;Acc:1307612]	-1.58008	0.044	0.64	11.84	18.6
Agt	angiotensinogen [Source:RGD Symbol;Acc:2069]	-1.58008	0.038	0.57	450.71	709.69
Plin2	perilipin 2 [Source:RGD Symbol;Acc:728889]	-1.59107	0.039	0.58	32.73	51.88
Olr59	olfactory receptor 59 [Source:RGD Symbol;Acc:628858]	-1.59107	0.039	0.58	18.01	28.57
AABR07004549.1	\N	-1.59107	0.036	0.56	769.85	1219.45
Inhbc	inhibin subunit beta C [Source:RGD Symbol;Acc:621194]	-1.59107	0.039	0.58	24.79	39.11
Clec4f	C-type lectin domain family 4, member F [Source:RGD Symbol;Acc:621062]	-1.59107	0.049	0.67	9.85	15.56
AABR07005588.1	\N	-1.59107	0.042	0.61	18.87	29.78
Rup2	urinary protein 2 [Source:RGD Symbol;Acc:1561250]	-1.60214	0.033	0.54	8710.48	13902.2
Phyh	phytanoyl-CoA 2-hydroxylase [Source:RGD Symbol;Acc:620317]	-1.60214	0.033	0.54	336.25	535.9
LOC100911854	mannose-binding protein C-like [Source:RGD Symbol;Acc:6490749]	-1.60214	0.035	0.55	73.35	116.79
Hacl1	2-hydroxyacyl-CoA lyase 1 [Source:RGD Symbol;Acc:619849]	-1.60214	0.033	0.54	27.86	44.54
Ivd	isovaleryl-CoA dehydrogenase [Source:RGD Symbol;Acc:2936]	-1.60214	0.035	0.55	39.67	63.34
Enpp2	ectonucleotide pyrophosphatase/phosphodiesterase 2 [Source:RGD Symbol;Acc:69298]	-1.60214	0.038	0.57	17.18	27.36
Llgl2	LLGL scribble cell polarity complex component 2 [Source:RGD Symbol;Acc:1560307]	-1.60214	0.036	0.56	14.69	23.39
Galt	galactose-1-phosphate uridylyltransferase [Source:RGD Symbol;Acc:1306483]	-1.61328	0.035	0.55	32.98	53.06
C1qa	complement C1q A chain [Source:RGD Symbol;Acc:1306716]	-1.61328	0.046	0.65	16.2	25.99
AABR07066188.1	\N	-1.61328	0.04	0.59	10.67	17.13
Wsb1	WD repeat and SOCS box-containing 1 [Source:RGD Symbol;Acc:1307835]	-1.61328	0.034	0.54	29.02	46.55
Mocs1	molybdenum cofactor synthesis 1 [Source:RGD Symbol;Acc:1308471]	-1.61328	0.049	0.67	7.75	12.41
Tsc22d1	TSC22 domain family, member 1 [Source:RGD Symbol;Acc:3850]	-1.6245	0.029	0.5	113.86	184.07
AABR07035343.1	\N	-1.6245	0.036	0.56	25.16	40.69
Psen2	presenilin 2 [Source:RGD Symbol;Acc:621060]	-1.6358	0.035	0.55	10.16	16.76
Atxn7l1	ataxin 7-like 1 [Source:RGD Symbol;Acc:1305730]	-1.6358	0.041	0.61	6.25	9.8
Gucy1b2	guanylate cyclase 1 soluble subunit beta 2 [Source:RGD Symbol;Acc:2770]	-1.6358	0.031	0.51	12.8	20.98
Tmem86b	transmembrane protein 86B [Source:RGD Symbol;Acc:1593455]	-1.6358	0.027	0.47	168.13	274.95
Ndrg2	NDRG family member 2 [Source:RGD Symbol;Acc:621874]	-1.6358	0.025	0.46	200.63	327.3
Cbs	cystathionine beta synthase [Source:RGD Symbol;Acc:2287]	-1.6358	0.027	0.49	90.04	146.04
Fgfr2	fibroblast growth factor receptor 2 [Source:RGD Symbol;Acc:2611]	-1.6358	0.033	0.54	5.79	9.42
Sod3	superoxide dismutase 3 [Source:RGD Symbol;Acc:3733]	-1.6358	0.036	0.56	10.72	17.46
Gjb1	gap junction protein, beta 1 [Source:RGD Symbol;Acc:61926]	-1.6358	0.028	0.49	186.21	303.38
Eepd1	endonuclease/exonuclease/phosphatase family domain containing 1 [Source:RGD Symbol;Acc:1307401]	-1.6358	0.047	0.65	4.23	6.87
Hamp	hepcidin antimicrobial peptide [Source:RGD Symbol;Acc:70971]	-1.64718	0.025	0.45	1432.34	2362.97
Nfil3	nuclear factor, interleukin 3 regulated [Source:RGD Symbol;Acc:620972]	-1.64718	0.031	0.52	12.65	20.71
Rtn4rl1	reticulon 4 receptor-like 1 [Source:RGD Symbol;Acc:727812]	-1.64718	0.044	0.64	2.53	4.14
Nectin3	nectin cell adhesion molecule 3 [Source:RGD Symbol;Acc:1309516]	-1.64718	0.043	0.62	6.58	10.77
Acox3	acyl-CoA oxidase 3, pristanoyl [Source:RGD Symbol;Acc:69245]	-1.64718	0.026	0.46	30.61	50.21
Prodh1	proline dehydrogenase 1 [Source:RGD Symbol;Acc:1590932]	-1.65864	0.024	0.44	34.93	57.54
Rab38	RAB38, member RAS oncogene family [Source:RGD Symbol;Acc:628752]	-1.65864	0.042	0.61	6.46	10.66
Tcp11l2	t-complex 11 like 2 [Source:RGD Symbol;Acc:1307494]	-1.65864	0.033	0.54	6.55	10.82
Retsat	retinol saturase [Source:RGD Symbol;Acc:628802]	-1.65864	0.022	0.42	182.05	300.31
Cyp3a18	cytochrome P450, family 3, subfamily a, polypeptide 18 [Source:RGD Symbol;Acc:628709]	-1.65864	0.022	0.41	210.72	348.78
Agmo	alkylglycerol monooxygenase [Source:RGD Symbol;Acc:1312038]	-1.65864	0.023	0.42	72.96	120.59
Trmt44	tRNA methyltransferase 44 [Source:RGD Symbol;Acc:1308380]	-1.65864	0.045	0.65	0.92	1.52
LOC100912405	urinary protein 3-like [Source:RGD Symbol;Acc:6487535]	-1.67018	0.02	0.4	1713.8	2861.79
Smad7	SMAD family member 7 [Source:RGD Symbol;Acc:69314]	-1.67018	0.034	0.54	2.64	4.38
Lipo1	lipase, member O1 [Source:RGD Symbol;Acc:1565682]	-1.67018	0.036	0.56	3.17	5.26
Hpd	4-hydroxyphenylpyruvate dioxygenase [Source:RGD Symbol;Acc:61974]	-1.68179	0.018	0.38	824.32	1383.44
LOC500124	similar to RIKEN cDNA 4921507P07 [Source:RGD Symbol;Acc:1563788]	-1.68179	0.046	0.65	3.06	5.11
Trhde	thyrotropin-releasing hormone degrading enzyme [Source:RGD Symbol;Acc:728895]	-1.68179	0.046	0.65	0.87	1.46
Cyp2c12	cytochrome P450, family 2, subfamily c, polypeptide 12 [Source:RGD Symbol;Acc:2470]	-1.69349	0.019	0.38	34.41	58.1
AABR07044404.1	\N	-1.69349	0.049	0.67	2.86	4.8
Cyp2c11	cytochrome P450, subfamily 2, polypeptide 11 [Source:RGD Symbol;Acc:2469]	-1.69349	0.017	0.36	1003.11	1688.64
Col14a1	collagen type XIV alpha 1 chain [Source:RGD Symbol;Acc:1305806]	-1.69349	0.034	0.55	1.49	2.51
Letm1	leucine zipper and EF-hand containing transmembrane protein 1 [Source:RGD Symbol;Acc:1359678]	-1.69349	0.031	0.52	3.86	6.48
St3gal3	ST3 beta-galactoside alpha-2,3-sialyltransferase 3 [Source:RGD Symbol;Acc:68414]	-1.69349	0.046	0.65	5.25	8.82
Rnd2	Rho family GTPase 2 [Source:RGD Symbol;Acc:1306172]	-1.69349	0.024	0.43	18.11	30.47
AABR07035348.1	\N	-1.69349	0.021	0.41	39.2	65.9
LOC688583	similar to High mobility group protein 4 (HMG-4) (High mobility group protein 2a) (HMG-2a) [Source:RGD Symbol;Acc:1587596]	-1.70527	0.04	0.59	4.62	9.2
Ppp1r3c	protein phosphatase 1, regulatory subunit 3C [Source:RGD Symbol;Acc:1309132]	-1.71713	0.016	0.34	48.19	82.06
Cmtm6	CKLF-like MARVEL transmembrane domain containing 6 [Source:RGD Symbol;Acc:1307765]	-1.71713	0.016	0.34	25.09	42.8
Axl	Axl receptor tyrosine kinase [Source:RGD Symbol;Acc:620028]	-1.71713	0.032	0.53	1.55	2.73
Cdh17	cadherin 17 [Source:RGD Symbol;Acc:619748]	-1.71713	0.016	0.35	21.39	36.41
Col4a1	collagen type IV alpha 1 chain [Source:RGD Symbol;Acc:1307148]	-1.71713	0.023	0.42	2.04	3.48
Dhtkd1	dehydrogenase E1 and transketolase domain containing 1 [Source:RGD Symbol;Acc:1308092]	-1.71713	0.015	0.33	42.26	72.36
Nt5e	5' nucleotidase, ecto [Source:RGD Symbol;Acc:61956]	-1.71713	0.018	0.38	8.42	14.42
Tmed5	transmembrane p24 trafficking protein 5 [Source:RGD Symbol;Acc:1359437]	-1.72907	0.045	0.64	5.99	10.29
Adgrv1	adhesion G protein-coupled receptor V1 [Source:RGD Symbol;Acc:1562101]	-1.72907	0.03	0.5	8.43	13.41
Tat	tyrosine aminotransferase [Source:RGD Symbol;Acc:3820]	-1.72907	0.014	0.31	336.43	577.73
Dock5	dedicator of cytokinesis 5 [Source:RGD Symbol;Acc:1306872]	-1.72907	0.035	0.55	0.94	1.62
Sema6d	semaphorin 6D [Source:RGD Symbol;Acc:1310910]	-1.72907	0.042	0.61	0.72	1.23
RGD1560795	similar to Sepiapterin reductase (SPR) [Source:RGD Symbol;Acc:1560795]	-1.72907	0.034	0.54	17.79	30.86
S1pr1	sphingosine-1-phosphate receptor 1 [Source:RGD Symbol;Acc:61958]	-1.72907	0.016	0.34	17.64	30.32
Psmd9	proteasome 26S subunit, non-ATPase 9 [Source:RGD Symbol;Acc:621110]	-1.72907	0.02	0.4	13.95	23.99
Actn1	actinin, alpha 1 [Source:RGD Symbol;Acc:70907]	-1.72907	0.03	0.5	2.22	3.77
Ypel2	yippee-like 2 [Source:RGD Symbol;Acc:1311564]	-1.7411	0.044	0.63	1.85	3.2
Cd5l	Cd5 molecule-like [Source:RGD Symbol;Acc:1308526]	-1.7411	0.035	0.55	2.69	4.67
Bhmt	betaine-homocysteine S-methyltransferase [Source:RGD Symbol;Acc:621496]	-1.75321	0.011	0.27	1078.33	1881.73
Slc28a2	solute carrier family 28 member 2 [Source:RGD Symbol;Acc:61840]	-1.75321	0.012	0.29	33.91	59.39
LOC103689961	selenoprotein W-like [Source:RGD Symbol;Acc:9418506]	-1.75321	0.049	0.67	9.98	20.41
LOC103690005	tubulin-folding cofactor B [Source:RGD Symbol;Acc:9365423]	-1.75321	0.02	0.4	13.73	23.93
Abcc2	ATP binding cassette subfamily C member 2 [Source:RGD Symbol;Acc:2366]	-1.75321	0.012	0.29	24.01	41.75
Chd3	chromodomain helicase DNA binding protein 3 [Source:RGD Symbol;Acc:1311923]	-1.75321	0.014	0.32	4.64	8.08
Sesn2	sestrin 2 [Source:RGD Symbol;Acc:1566319]	-1.75321	0.014	0.32	7.72	13.46
AABR07061950.1	\N	-1.75321	0.012	0.28	106.91	186.36
Apon	apolipoprotein N [Source:RGD Symbol;Acc:1311384]	-1.76541	0.01	0.27	122.42	215.82
Arhgap5	Rho GTPase activating protein 5 [Source:RGD Symbol;Acc:1308507]	-1.76541	0.027	0.48	1.18	2.07
Lrp6	LDL receptor related protein 6 [Source:RGD Symbol;Acc:1304749]	-1.76541	0.024	0.43	1.5	2.64
Cyp2t1	cytochrome P450, family 2, subfamily t, polypeptide 1 [Source:RGD Symbol;Acc:620086]	-1.76541	0.014	0.32	12.5	20.32
Pde4b	phosphodiesterase 4B [Source:RGD Symbol;Acc:3280]	-1.76541	0.032	0.53	2.21	3.85
Crym	crystallin, mu [Source:RGD Symbol;Acc:620943]	-1.76541	0.014	0.31	21.68	38.19
Adam15	ADAM metallopeptidase domain 15 [Source:RGD Symbol;Acc:620402]	-1.76541	0.02	0.39	3.58	6.28
Col5a1	collagen type V alpha 1 chain [Source:RGD Symbol;Acc:70920]	-1.76541	0.02	0.39	1.66	2.87
Fam117b	family with sequence similarity 117, member B [Source:RGD Symbol;Acc:1307676]	-1.76541	0.014	0.32	4.51	7.93
Otc	ornithine carbamoyltransferase [Source:RGD Symbol;Acc:3236]	-1.76541	0.01	0.26	180.01	317.21
Cldn1	claudin 1 [Source:RGD Symbol;Acc:68422]	-1.77769	0.011	0.28	10.45	18.51
Cry1	cryptochrome circadian regulator 1 [Source:RGD Symbol;Acc:735083]	-1.77769	0.048	0.66	1.03	1.82
AABR07048473.1	\N	-1.77769	0.012	0.28	31.88	56.31
S100pbp	S100P binding protein [Source:RGD Symbol;Acc:1564943]	-1.77769	0.041	0.61	1.28	2.25
Arhgap42	Rho GTPase activating protein 42 [Source:RGD Symbol;Acc:1564081]	-1.77769	0.017	0.35	3.08	5.45
Mapkapk2	MAPK activated protein kinase 2 [Source:RGD Symbol;Acc:631362]	-1.77769	0.011	0.27	14.88	26.37
Apoa2	apolipoprotein A2 [Source:RGD Symbol;Acc:2131]	-1.77769	0.0096	0.26	2254.54	4002.3
Dpp6	dipeptidyl peptidase like 6 [Source:RGD Symbol;Acc:68402]	-1.77769	0.03	0.51	1.08	1.9
Tsc22d3	TSC22 domain family, member 3 [Source:RGD Symbol;Acc:621654]	-1.77769	0.011	0.27	31.93	56.33
Mettl7b	methyltransferase like 7B [Source:RGD Symbol;Acc:1305205]	-1.77769	0.0095	0.25	277.72	491.58
Clic4	chloride intracellular channel 4 [Source:RGD Symbol;Acc:61857]	-1.77769	0.031	0.52	4.67	8.26
Fam50a	family with sequence similarity 50, member A [Source:RGD Symbol;Acc:1560964]	-1.79005	0.021	0.41	6.12	10.86
Etv3	ETS variant transcription factor 3 [Source:RGD Symbol;Acc:1311577]	-1.79005	0.015	0.33	2.94	5.29
Cldn2	claudin 2 [Source:RGD Symbol;Acc:1560247]	-1.79005	0.0097	0.26	21.76	38.75
Klf12	Kruppel-like factor 12 [Source:RGD Symbol;Acc:1309204]	-1.79005	0.042	0.61	1.48	2.79
Oaf	out at first homolog [Source:RGD Symbol;Acc:1305890]	-1.79005	0.0088	0.24	98.7	176.09
RGD1564865	similar to 20-alpha-hydroxysteroid dehydrogenase [Source:RGD Symbol;Acc:1564865]	-1.8025	0.012	0.28	19.39	34.82
Nnmt	nicotinamide N-methyltransferase [Source:RGD Symbol;Acc:1309606]	-1.8025	0.0098	0.26	39.13	70.22
Steap3	STEAP3 metalloreductase [Source:RGD Symbol;Acc:708552]	-1.8025	0.012	0.29	5.64	10.12
Serinc5	serine incorporator 5 [Source:RGD Symbol;Acc:621571]	-1.8025	0.012	0.28	3.64	6.51
Ccnd1	cyclin D1 [Source:RGD Symbol;Acc:68384]	-1.8025	0.0097	0.26	9.11	16.34
Egf	epidermal growth factor [Source:RGD Symbol;Acc:2542]	-1.8025	0.019	0.38	2.1	3.77
Adipor2	adiponectin receptor 2 [Source:RGD Symbol;Acc:1307891]	-1.8025	0.012	0.29	12.83	23.06
Atg13	autophagy related 13 [Source:RGD Symbol;Acc:1310685]	-1.81504	0.017	0.35	5.74	10.38
Zdhhc23	zinc finger, DHHC-type containing 23 [Source:RGD Symbol;Acc:1303254]	-1.81504	0.011	0.27	3.42	6.16
Notch2	notch receptor 2 [Source:RGD Symbol;Acc:3188]	-1.81504	0.011	0.27	1.83	3.48
Chchd6	coiled-coil-helix-coiled-coil-helix domain containing 6 [Source:RGD Symbol;Acc:1304561]	-1.81504	0.024	0.44	5.53	10
Stat5b	signal transducer and activator of transcription 5B [Source:RGD Symbol;Acc:3774]	-1.81504	0.013	0.3	4.38	8.1
Vps13c	vacuolar protein sorting 13 homolog C [Source:RGD Symbol;Acc:1560364]	-1.81504	0.017	0.35	0.69	1.24
Ccdc167	coiled-coil domain containing 167 [Source:RGD Symbol;Acc:1588733]	-1.81504	0.047	0.65	3.79	6.84
Paqr7	progestin and adipoQ receptor family member 7 [Source:RGD Symbol;Acc:1563621]	-1.81504	0.0078	0.22	26.67	48.3
Cers6	ceramide synthase 6 [Source:RGD Symbol;Acc:1561599]	-1.81504	0.036	0.56	1.62	2.93
Pld1	phospholipase D1 [Source:RGD Symbol;Acc:3349]	-1.82766	0.016	0.34	1.42	2.6
Mtf2	metal response element binding transcription factor 2 [Source:RGD Symbol;Acc:1304727]	-1.82766	0.045	0.65	1.03	1.87
AABR07024870.1	\N	-1.82766	0.0068	0.2	153.97	280.11
Samd11	sterile alpha motif domain containing 11 [Source:RGD Symbol;Acc:1310271]	-1.82766	0.014	0.31	6.65	12.06
Tnfrsf1b	TNF receptor superfamily member 1B [Source:RGD Symbol;Acc:621238]	-1.82766	0.013	0.31	3.29	5.98
St6galnac4	ST6 N-acetylgalactosaminide alpha-2,6-sialyltransferase 4 [Source:RGD Symbol;Acc:1303005]	-1.84038	0.0076	0.21	10.22	18.74
Rarres1	retinoic acid receptor responder 1 [Source:RGD Symbol;Acc:1309509]	-1.84038	0.0074	0.21	30.98	56.69
Pcdh1	protocadherin 1 [Source:RGD Symbol;Acc:1308490]	-1.84038	0.0093	0.25	3.36	6.16
Marchf6	membrane associated ring-CH-type finger 6 [Source:RGD Symbol;Acc:1565757]	-1.84038	0.01	0.26	4.06	7.45
5330417C22Rik	RIKEN cDNA 5330417C22 gene [Source:MGI Symbol;Acc:MGI:1923930]	-1.85318	0.0084	0.23	5.44	10.06
Rasgef1b	RasGEF domain family, member 1B [Source:RGD Symbol;Acc:1562220]	-1.85318	0.014	0.32	4.64	8.55
AC123346.1	\N	-1.85318	0.018	0.38	0.97	1.79
AABR07052458.1	\N	-1.85318	0.045	0.64	3.16	5.85
Scarf2	scavenger receptor class F, member 2 [Source:RGD Symbol;Acc:1306013]	-1.85318	0.04	0.59	0.74	1.37
LOC680406	similar to Urinary protein 2 precursor (RUP-2) [Source:RGD Symbol;Acc:1591793]	-1.86607	0.0048	0.15	1516.4	2822.7
Gls2	glutaminase 2 [Source:RGD Symbol;Acc:620359]	-1.86607	0.0051	0.16	49.93	92.73
Olr35	olfactory receptor 35 [Source:RGD Symbol;Acc:1333428]	-1.86607	0.014	0.31	5.3	9.23
Notum	NOTUM, palmitoleoyl-protein carboxylesterase [Source:RGD Symbol;Acc:1307119]	-1.86607	0.006	0.18	26.39	48.84
Hectd4	HECT domain E3 ubiquitin protein ligase 4 [Source:RGD Symbol;Acc:1309762]	-1.86607	0.013	0.31	0.52	0.97
C2cd2	C2 calcium-dependent domain containing 2 [Source:RGD Symbol;Acc:735112]	-1.86607	0.012	0.28	2.5	4.54
Onecut2	one cut homeobox 2 [Source:RGD Symbol;Acc:1564677]	-1.86607	0.027	0.47	3.19	5.91
Nectin2	nectin cell adhesion molecule 2 [Source:RGD Symbol;Acc:1309505]	-1.87905	0.0052	0.16	31.09	58.92
AABR07049821.2	\N	-1.87905	0.013	0.31	2.92	5.44
Rc3h1	ring finger and CCCH-type domains 1 [Source:RGD Symbol;Acc:1563512]	-1.87905	0.034	0.54	0.65	1.87
Septin9	septin 9 [Source:MGI Symbol;Acc:MGI:1858222]	-1.87905	0.014	0.32	3.87	7.23
Esr1	estrogen receptor 1 [Source:RGD Symbol;Acc:2581]	-1.89212	0.0078	0.22	2.24	4.28
Col4a2	collagen type IV alpha 2 chain [Source:RGD Symbol;Acc:1308085]	-1.89212	0.016	0.34	0.93	1.74
Acnat2	acyl-coenzyme A amino acid N-acyltransferase 2 [Source:RGD Symbol;Acc:1359532]	-1.89212	0.004	0.13	332.17	592.1
Adamts7	ADAM metallopeptidase with thrombospondin type 1 motif, 7 [Source:RGD Symbol;Acc:1306713]	-1.89212	0.0081	0.22	2.26	4.24
Arhgap24	Rho GTPase activating protein 24 [Source:RGD Symbol;Acc:1306669]	-1.89212	0.011	0.27	2.77	5.91
Tet3	tet methylcytosine dioxygenase 3 [Source:RGD Symbol;Acc:1590584]	-1.89212	0.025	0.46	0.48	0.89
RGD1565616	RGD1565616 [Source:RGD Symbol;Acc:1565616]	-1.90528	0.0091	0.24	1.62	3.08
Hipk3	homeodomain interacting protein kinase 3 [Source:RGD Symbol;Acc:619884]	-1.90528	0.024	0.43	0.82	1.52
LOC100912026	urinary protein 3-like [Source:RGD Symbol;Acc:6489452]	-1.90528	0.015	0.33	14.53	27.7
Ddx58	DEXD/H-box helicase 58 [Source:RGD Symbol;Acc:1309460]	-1.90528	0.017	0.36	2.46	4.67
Mreg	melanoregulin [Source:RGD Symbol;Acc:1562333]	-1.91853	0.0036	0.12	49.95	104.42
Pard6b	par-6 family cell polarity regulator beta [Source:RGD Symbol;Acc:1308205]	-1.91853	0.03	0.5	0.82	1.56
Egfr	epidermal growth factor receptor [Source:RGD Symbol;Acc:2543]	-1.91853	0.0044	0.14	7.8	14.88
Ptpdc1	protein tyrosine phosphatase domain containing 1 [Source:RGD Symbol;Acc:1307698]	-1.93187	0.042	0.62	0.67	1.26
Plekho2	pleckstrin homology domain containing O2 [Source:RGD Symbol;Acc:1305718]	-1.93187	0.021	0.41	1.99	3.82
Hsd3b7	hydroxy-delta-5-steroid dehydrogenase, 3 beta- and steroid delta-isomerase 7 [Source:RGD Symbol;Acc:628727]	-1.93187	0.0034	0.12	47.74	91.71
Tp53inp1	tumor protein p53 inducible nuclear protein 1 [Source:RGD Symbol;Acc:631423]	-1.93187	0.029	0.5	3.01	5.77
Mical3	microtubule associated monooxygenase, calponin and LIM domain containing 3 [Source:RGD Symbol;Acc:1359504]	-1.93187	0.01	0.26	0.96	1.85
Akr1c3	aldo-keto reductase family 1, member C3 [Source:RGD Symbol;Acc:708428]	-1.94531	0.0067	0.19	7.84	15.19
Pdgfra	platelet derived growth factor receptor alpha [Source:RGD Symbol;Acc:3284]	-1.94531	0.011	0.28	0.78	1.51
Dexi	Dexi homolog [Source:RGD Symbol;Acc:1564938]	-1.94531	0.0044	0.14	14.94	28.94
Sik1	salt-inducible kinase 1 [Source:RGD Symbol;Acc:69407]	-1.95884	0.0053	0.17	1.97	3.86
Als2cl	ALS2 C-terminal like [Source:RGD Symbol;Acc:1305208]	-1.95884	0.012	0.29	1.59	3.11
Adra2b	adrenoceptor alpha 2B [Source:RGD Symbol;Acc:2057]	-1.95884	0.016	0.35	0.84	1.64
Bco2	beta-carotene oxygenase 2 [Source:RGD Symbol;Acc:1309022]	-1.97247	0.0035	0.12	8.02	15.91
Mapk1ip1l	mitogen-activated protein kinase 1 interacting protein 1-like [Source:RGD Symbol;Acc:1311455]	-1.97247	0.011	0.27	3.39	6.68
Sytl2	synaptotagmin-like 2 [Source:RGD Symbol;Acc:1307647]	-1.97247	0.024	0.43	1.38	2.68
Krt10	keratin 10 [Source:RGD Symbol;Acc:1359092]	-1.98618	0.011	0.27	2.01	3.97
Loxl4	lysyl oxidase-like 4 [Source:RGD Symbol;Acc:1308588]	-1.98618	0.0064	0.19	2.46	4.85
Trim2	tripartite motif-containing 2 [Source:RGD Symbol;Acc:1310981]	-1.98618	0.0051	0.16	1.49	2.94
Glul	glutamate-ammonia ligase [Source:RGD Symbol;Acc:2710]	-1.98618	0.002	0.079	59.69	118.37
Invs	inversin [Source:RGD Symbol;Acc:1563359]	-1.98618	0.046	0.65	0.4	0.78
Dync2h1	dynein cytoplasmic 2 heavy chain 1 [Source:RGD Symbol;Acc:71042]	-1.98618	0.041	0.61	0.13	0.26
Adamts1	ADAM metallopeptidase with thrombospondin type 1 motif, 1 [Source:RGD Symbol;Acc:621241]	-2	0.0099	0.26	1.03	2.06
Cfd	complement factor D [Source:RGD Symbol;Acc:2498]	-2	0.04	0.59	2.46	4.91
Pdgfrb	platelet derived growth factor receptor beta [Source:RGD Symbol;Acc:3285]	-2	0.0034	0.12	2.63	5.22
Itsn1	intersectin 1 [Source:RGD Symbol;Acc:2935]	-2	0.0048	0.15	2.03	4.21
Tspan33	tetraspanin 33 [Source:RGD Symbol;Acc:1560915]	-2	0.0054	0.17	3.87	7.7
Traf1	TNF receptor-associated factor 1 [Source:RGD Symbol;Acc:1596290]	-2	0.034	0.54	1	1.99
Slc7a2	solute carrier family 7 member 2 [Source:RGD Symbol;Acc:68387]	-2.01391	0.0022	0.085	13.39	26.79
Extl1	exostosin-like glycosyltransferase 1 [Source:RGD Symbol;Acc:1309572]	-2.01391	0.0022	0.085	6.89	13.81
St8sia3	ST8 alpha-N-acetyl-neuraminide alpha-2,8-sialyltransferase 3 [Source:RGD Symbol;Acc:3680]	-2.01391	0.0052	0.16	4.42	8.88
Tob2	transducer of ERBB2, 2 [Source:RGD Symbol;Acc:1359722]	-2.01391	0.0032	0.11	5.86	11.78
Dmxl2	Dmx-like 2 [Source:RGD Symbol;Acc:1586163]	-2.01391	0.0031	0.11	1.32	2.64
Irx1	iroquois homeobox 1 [Source:RGD Symbol;Acc:1309060]	-2.02792	0.022	0.42	0.9	1.82
Srrd	SRR1 domain containing [Source:RGD Symbol;Acc:1562579]	-2.02792	0.038	0.57	2.72	5.49
Cd93	CD93 molecule [Source:RGD Symbol;Acc:621251]	-2.02792	0.041	0.61	0.27	0.54
Arnt	aryl hydrocarbon receptor nuclear translocator [Source:RGD Symbol;Acc:2153]	-2.04202	0.0062	0.18	2.01	4.06
Itpr2	inositol 1,4,5-trisphosphate receptor, type 2 [Source:RGD Symbol;Acc:69649]	-2.04202	0.017	0.36	0.41	0.84
Smoc2	SPARC related modular calcium binding 2 [Source:RGD Symbol;Acc:1306681]	-2.04202	0.026	0.47	0.73	1.39
Dab1	DAB adaptor protein 1 [Source:RGD Symbol;Acc:628770]	-2.04202	0.0037	0.13	1.36	3.12
Gpat4	glycerol-3-phosphate acyltransferase 4 [Source:RGD Symbol;Acc:1310520]	-2.04202	0.0017	0.068	11.92	24.28
Etv6	ETS variant transcription factor 6 [Source:RGD Symbol;Acc:1559537]	-2.04202	0.036	0.56	0.87	1.76
Slc25a25	solute carrier family 25 member 25 [Source:RGD Symbol;Acc:628666]	-2.04202	0.0014	0.057	44.07	89.65
Tymp	thymidine phosphorylase [Source:RGD Symbol;Acc:1305756]	-2.05623	0.0012	0.053	199.83	408.06
Gon7	GON7 subunit of KEOPS complex [Source:RGD Symbol;Acc:2302582]	-2.05623	0.0034	0.12	9.98	13.55
Larp4b	La ribonucleoprotein 4B [Source:RGD Symbol;Acc:1310713]	-2.05623	0.008	0.22	1.68	3.39
RGD1307603	glutathione S-transferase pi 3 [Source:MGI Symbol;Acc:MGI:2385078]	-2.05623	0.0013	0.055	348.75	713.7
Mrpl36	mitochondrial ribosomal protein L36 [Source:RGD Symbol;Acc:1306375]	-2.05623	0.016	0.35	28.58	58.66
E2f3	E2F transcription factor 3 [Source:RGD Symbol;Acc:1561600]	-2.07053	0.032	0.53	1.06	2.23
Chka	choline kinase alpha [Source:RGD Symbol;Acc:61944]	-2.08493	0.0011	0.047	36.58	75.75
Cpne3	copine 3 [Source:RGD Symbol;Acc:1310178]	-2.08493	0.0068	0.19	1.42	2.95
Atxn7	ataxin 7 [Source:RGD Symbol;Acc:1562692]	-2.08493	0.034	0.54	0.47	0.97
LOC108348145	zinc finger protein 7-like [Source:RGD Symbol;Acc:11394947]	-2.09943	0.027	0.49	0.92	1.05
Dipk2a	divergent protein kinase domain 2A [Source:RGD Symbol;Acc:1309079]	-2.09943	0.0015	0.06	4.77	9.97
Znf48	zinc finger protein 48 [Source:RGD Symbol;Acc:9115869]	-2.09943	0.03	0.51	0.67	1.41
Insyn1	inhibitory synaptic factor 1 [Source:RGD Symbol;Acc:1562618]	-2.09943	0.022	0.42	0.26	0.55
Asxl2	ASXL transcriptional regulator 2 [Source:RGD Symbol;Acc:1304710]	-2.09943	0.03	0.51	0.34	0.72
Gdpd1	glycerophosphodiester phosphodiesterase domain containing 1 [Source:RGD Symbol;Acc:1311813]	-2.09943	0.03	0.51	1.45	2.87
Calhm2	calcium homeostasis modulator family member 2 [Source:RGD Symbol;Acc:1308276]	-2.11404	0.039	0.58	0.68	1.43
Vsir	V-set immunoregulatory receptor [Source:RGD Symbol;Acc:1590938]	-2.11404	0.029	0.5	0.83	1.74
Aass	aminoadipate-semialdehyde synthase [Source:RGD Symbol;Acc:1310811]	-2.11404	0.0011	0.048	11.93	25.01
Reln	reelin [Source:RGD Symbol;Acc:3553]	-2.11404	0.0034	0.12	0.52	1.1
Vps37b	VPS37B subunit of ESCRT-I [Source:RGD Symbol;Acc:1304576]	-2.12874	0.0017	0.068	4.04	8.58
Akap2	A-kinase anchoring protein 2 [Source:RGD Symbol;Acc:1305135]	-2.12874	0.012	0.29	0.63	1.56
Gnmt	glycine N-methyltransferase [Source:RGD Symbol;Acc:2719]	-2.12874	0.00072	0.035	254.58	539.19
Cyp2d4	cytochrome P450, family 2, subfamily d, polypeptide 4 [Source:RGD Symbol;Acc:620640]	-2.12874	0.0011	0.049	12.66	26.84
Cep97	centrosomal protein 97 [Source:RGD Symbol;Acc:1307400]	-2.12874	0.03	0.51	0.38	0.81
Cd163	CD163 molecule [Source:RGD Symbol;Acc:1310382]	-2.14355	0.018	0.38	0.42	0.97
Gulo	gulonolactone (L-) oxidase [Source:RGD Symbol;Acc:620701]	-2.14355	0.00063	0.031	181.05	385.71
Lag3	lymphocyte activating 3 [Source:RGD Symbol;Acc:1302990]	-2.14355	0.025	0.46	0.8	1.7
Bcl6	BCL6, transcription repressor [Source:RGD Symbol;Acc:1309345]	-2.15846	0.0014	0.057	3.31	7.11
Meiob	meiosis specific with OB-fold [Source:RGD Symbol;Acc:1583204]	-2.17347	0.032	0.53	0.76	1.65
Ikbkg	inhibitor of nuclear factor kappa B kinase regulatory subunit gamma [Source:RGD Symbol;Acc:735223]	-2.17347	0.032	0.53	0.89	1.92
Mpzl2	myelin protein zero-like 2 [Source:RGD Symbol;Acc:1307196]	-2.17347	0.0099	0.26	0.68	1.48
Col27a1	collagen type XXVII alpha 1 chain [Source:RGD Symbol;Acc:735115]	-2.18859	0.00085	0.04	2.8	6.11
Zbtb38	zinc finger and BTB domain containing 38 [Source:RGD Symbol;Acc:1310136]	-2.20381	0.015	0.34	0.4	0.89
AABR07021544.1	\N	-2.20381	0.0014	0.059	2.06	4.93
Slco1b2	solute carrier organic anion transporter family, member 1B2 [Source:RGD Symbol;Acc:69300]	-2.20381	0.00038	0.021	84.79	186.15
MGC108823	similar to interferon-inducible GTPase [Source:RGD Symbol;Acc:1359421]	-2.21914	0.00056	0.028	16.24	35.89
LOC100362216	RIKEN cDNA 2810459M11 gene [Source:MGI Symbol;Acc:MGI:1920042]	-2.21914	0.0064	0.19	3.98	8.79
Cyp1a2	cytochrome P450, family 1, subfamily a, polypeptide 2 [Source:RGD Symbol;Acc:2459]	-2.23457	0.00033	0.018	126.99	281.82
Faahl	fatty-acid amide hydrolase-like [Source:RGD Symbol;Acc:6491947]	-2.23457	0.00084	0.04	6.35	14.18
Uhmk1	U2AF homology motif kinase 1 [Source:RGD Symbol;Acc:2968]	-2.23457	0.02	0.4	0.38	0.84
Ireb2	iron responsive element binding protein 2 [Source:RGD Symbol;Acc:621539]	-2.23457	0.00061	0.031	5.11	11.41
Oca2	OCA2 melanosomal transmembrane protein [Source:RGD Symbol;Acc:2318412]	-2.23457	0.0076	0.21	0.85	1.9
Pcp4l1	Purkinje cell protein 4-like 1 [Source:RGD Symbol;Acc:1593809]	-2.25012	0.0027	0.1	2.67	6
LOC100910057	sulfotransferase 1C2-like [Source:RGD Symbol;Acc:6500449]	-2.26577	0.001	0.045	6.24	14.94
Got1	glutamic-oxaloacetic transaminase 1 [Source:RGD Symbol;Acc:2721]	-2.26577	0.00027	0.016	71.35	160.78
Crem	cAMP responsive element modulator [Source:RGD Symbol;Acc:2402]	-2.26577	0.00033	0.018	25.85	55.64
Sez6	seizure related 6 homolog [Source:RGD Symbol;Acc:619780]	-2.26577	0.00036	0.02	7.93	17.83
Tspan12	tetraspanin 12 [Source:RGD Symbol;Acc:1311102]	-2.28153	0.00027	0.016	19.16	43.61
Slc25a13	solute carrier family 25 member 13 [Source:RGD Symbol;Acc:1565889]	-2.28153	0.00046	0.024	11.92	27.07
AABR07035374.1	\N	-2.28153	0.00024	0.014	212.78	483.71
Ccnj	cyclin J [Source:RGD Symbol;Acc:1306399]	-2.2974	0.015	0.34	0.32	0.71
Elovl5	ELOVL fatty acid elongase 5 [Source:RGD Symbol;Acc:620583]	-2.2974	0.00026	0.016	46.52	106.18
Ctdsp2	CTD small phosphatase 2 [Source:RGD Symbol;Acc:2319209]	-2.2974	0.0056	0.17	4.11	9.38
Pisd	phosphatidylserine decarboxylase [Source:RGD Symbol;Acc:1596729]	-2.2974	0.0056	0.17	2.19	5.5
Rb1	RB transcriptional corepressor 1 [Source:RGD Symbol;Acc:3540]	-2.2974	0.0047	0.15	0.81	1.84
Zfp770	zinc finger protein 770 [Source:RGD Symbol;Acc:1597283]	-2.2974	0.032	0.53	0.47	1.08
Rsph9	radial spoke head component 9 [Source:RGD Symbol;Acc:1310693]	-2.2974	0.045	0.64	1.03	2.36
Rnf125	ring finger protein 125 [Source:RGD Symbol;Acc:1306757]	-2.2974	0.0012	0.051	4.53	10.33
Fam210b	family with sequence similarity 210, member B [Source:RGD Symbol;Acc:1311378]	-2.31338	0.00045	0.024	6.68	15.44
Papss2	3'-phosphoadenosine 5'-phosphosulfate synthase 2 [Source:RGD Symbol;Acc:1307012]	-2.32947	0.00018	0.012	20.61	48.21
Hal	histidine ammonia lyase [Source:RGD Symbol;Acc:68363]	-2.32947	0.00016	0.011	45.47	105.61
Jade2	jade family PHD finger 2 [Source:RGD Symbol;Acc:1309152]	-2.34567	0.0043	0.14	0.74	1.74
RGD1309808	similar to apolipoprotein L2; apolipoprotein L-II [Source:RGD Symbol;Acc:1309808]	-2.34567	0.013	0.31	0.74	1.89
Tnks	tankyrase [Source:RGD Symbol;Acc:1308784]	-2.34567	0.012	0.29	0.3	0.7
Eml5	EMAP like 5 [Source:RGD Symbol;Acc:1303275]	-2.34567	0.0011	0.047	0.68	1.6
LOC100910790	spondin-2-like [Source:RGD Symbol;Acc:6496621]	-2.36199	0.00087	0.04	3	7.03
Chtopl1	chromatin target of PRMT1-like 1 [Source:RGD Symbol;Acc:1584868]	-2.36199	0.031	0.52	1.54	3.55
Mafb	MAF bZIP transcription factor B [Source:RGD Symbol;Acc:2982]	-2.36199	0.00017	0.011	22.2	52
LOC100910807	transcriptional regulator Kaiso-like [Source:RGD Symbol;Acc:6496755]	-2.36199	0.029	0.5	0.4	0.93
Fabp7	fatty acid binding protein 7 [Source:RGD Symbol;Acc:69312]	-2.37841	0.00019	0.012	37.68	89.05
Ranbp17	RAN binding protein 17 [Source:RGD Symbol;Acc:1562576]	-2.37841	0.0008	0.038	1.05	2.48
Sult1e1	sulfotransferase family 1E member 1 [Source:RGD Symbol;Acc:3776]	-2.39496	8.8e-05	0.0065	452.39	1082.4
LOC100910829	probable N-acetyltransferase CML2-like [Source:RGD Symbol;Acc:6496154]	-2.41162	0.0064	0.19	3.54	8.48
Nat8f2	N-acetyltransferase 8 (GCN5-related) family member 2 [Source:RGD Symbol;Acc:1561619]	-2.41162	0.0064	0.19	3.54	8.48
Tubb2a	tubulin, beta 2A class IIa [Source:RGD Symbol;Acc:1588452]	-2.42839	0.00011	0.008	19.49	46.81
Lect2	leukocyte cell-derived chemotaxin 2 [Source:RGD Symbol;Acc:1305404]	-2.42839	0.00011	0.0077	52.41	126.7
Pcsk5	proprotein convertase subtilisin/kexin type 5 [Source:RGD Symbol;Acc:620326]	-2.42839	0.0054	0.17	0.35	0.84
Smpd3	sphingomyelin phosphodiesterase 3 [Source:RGD Symbol;Acc:619754]	-2.44528	0.002	0.078	0.53	1.29
Prkce	protein kinase C, epsilon [Source:RGD Symbol;Acc:61925]	-2.44528	0.0088	0.24	0.73	1.78
Jcad	junctional cadherin 5 associated [Source:RGD Symbol;Acc:1562037]	-2.46229	0.00019	0.012	2.32	5.69
AABR07019392.1	\N	-2.46229	0.03	0.5	0.98	2.42
Ccdc127	coiled-coil domain containing 127 [Source:RGD Symbol;Acc:735106]	-2.46229	0.028	0.49	0.74	1.8
Slc16a4	solute carrier family 16, member 4 [Source:RGD Symbol;Acc:1359655]	-2.49666	6.5e-05	0.005	15.62	38.91
Vmac	vimentin-type intermediate filament associated coiled-coil protein [Source:RGD Symbol;Acc:1303340]	-2.49666	0.044	0.64	2.02	5.03
Kcnh1	potassium voltage-gated channel subfamily H member 1 [Source:RGD Symbol;Acc:68398]	-2.49666	0.044	0.64	0.14	0.35
RGD1560010	RGD1560010 [Source:RGD Symbol;Acc:1560010]	-2.49666	0.019	0.39	0.54	1.34
Cela1	chymotrypsin like elastase 1 [Source:RGD Symbol;Acc:2547]	-2.51403	0.00014	0.0095	11.15	27.9
Bach1	BTB domain and CNC homolog 1 [Source:RGD Symbol;Acc:1306693]	-2.51403	0.00088	0.041	1.04	2.57
LOC100911356	peroxisomal biogenesis factor 19-like [Source:RGD Symbol;Acc:6493558]	-2.51403	0.02	0.4	1.24	3.23
AABR07028902.1	\N	-2.51403	0.021	0.41	0.09	0.23
Insig2	insulin induced gene 2 [Source:RGD Symbol;Acc:631417]	-2.53151	4.2e-05	0.0034	61.17	154.64
Ltc4s	leukotriene C4 synthase [Source:RGD Symbol;Acc:620677]	-2.53151	0.0022	0.083	6.45	16.27
Asap2	ArfGAP with SH3 domain, ankyrin repeat and PH domain 2 [Source:RGD Symbol;Acc:1305263]	-2.53151	0.006	0.18	0.48	1.22
Ppard	peroxisome proliferator-activated receptor delta [Source:RGD Symbol;Acc:3370]	-2.53151	0.00024	0.015	1.78	4.63
Exph5	exophilin 5 [Source:RGD Symbol;Acc:1560308]	-2.54912	0.00089	0.041	0.31	0.78
Slc16a6	solute carrier family 16, member 6 [Source:RGD Symbol;Acc:735117]	-2.54912	0.012	0.29	0.54	1.32
Mpv17l	MPV17 mitochondrial inner membrane protein like [Source:RGD Symbol;Acc:2324483]	-2.54912	0.00089	0.041	5.05	12.9
Parp11	poly (ADP-ribose) polymerase family, member 11 [Source:RGD Symbol;Acc:1561791]	-2.54912	0.023	0.43	0.29	0.75
Kif5a	kinesin family member 5A [Source:RGD Symbol;Acc:1303035]	-2.54912	0.023	0.43	0.12	0.34
Csrp1	cysteine and glycine-rich protein 1 [Source:RGD Symbol;Acc:62053]	-2.56685	3.8e-05	0.0031	24.95	63.58
Abcg5	ATP binding cassette subfamily G member 5 [Source:RGD Symbol;Acc:620298]	-2.58471	0.00014	0.0098	2.96	7.61
Stx1b	syntaxin 1B [Source:RGD Symbol;Acc:3784]	-2.58471	0.0095	0.25	0.37	0.97
Kynu	kynureninase [Source:RGD Symbol;Acc:71061]	-2.60268	2.3e-05	0.0021	45.26	117.16
Akr1c1	aldo-keto reductase family 1, member C1 [Source:RGD Symbol;Acc:1306847]	-2.60268	3.2e-05	0.0027	29.94	77.5
RGD1309362	similar to interferon-inducible GTPase [Source:RGD Symbol;Acc:1309362]	-2.60268	0.00017	0.011	2.2	5.68
Klrg1	killer cell lectin like receptor G1 [Source:RGD Symbol;Acc:61978]	-2.62079	0.017	0.36	0.65	1.7
Top2a	DNA topoisomerase II alpha [Source:RGD Symbol;Acc:62048]	-2.62079	0.012	0.29	0.17	0.45
Srms	src-related kinase lacking C-terminal regulatory tyrosine and N-terminal myristylation sites [Source:RGD Symbol;Acc:1306602]	-2.63902	0.0051	0.16	0.55	1.44
Gimd1	GIMAP family P-loop NTPase domain containing 1 [Source:RGD Symbol;Acc:1563706]	-2.63902	0.00018	0.011	3.32	8.72
Lin7a	lin-7 homolog A, crumbs cell polarity complex component [Source:RGD Symbol;Acc:621256]	-2.63902	0.0029	0.1	3.17	8.38
Sarm1	sterile alpha and TIR motif containing 1 [Source:RGD Symbol;Acc:1310078]	-2.65737	0.0077	0.22	0.27	0.72
AABR07030861.1	\N	-2.67586	0.038	0.58	0.23	0.61
Nhlrc1	NHL repeat containing E3 ubiquitin protein ligase 1 [Source:RGD Symbol;Acc:735081]	-2.69447	0.008	0.22	0.96	2.56
Skil	SKI-like proto-oncogene [Source:RGD Symbol;Acc:621399]	-2.71321	0.041	0.61	0.19	0.51
Socs2	suppressor of cytokine signaling 2 [Source:RGD Symbol;Acc:69273]	-2.71321	3.9e-05	0.0032	7.04	19.07
Phc3	polyhomeotic homolog 3 [Source:RGD Symbol;Acc:1307998]	-2.71321	0.02	0.39	0.19	0.51
LOC102552166	helicase ARIP4-like [Source:RGD Symbol;Acc:7584316]	-2.73208	0.014	0.32	0.24	0.64
Lilrb3	leukocyte immunoglobulin like receptor B3 [Source:RGD Symbol;Acc:1566307]	-2.73208	0.0034	0.12	0.52	1.42
Bmf	Bcl2 modifying factor [Source:RGD Symbol;Acc:628658]	-2.75108	3.9e-05	0.0032	3.87	10.62
Cyp2u1	cytochrome P450, family 2, subfamily u, polypeptide 1 [Source:RGD Symbol;Acc:1309433]	-2.75108	0.0028	0.1	0.63	1.68
Adam11	ADAM metallopeptidase domain 11 [Source:RGD Symbol;Acc:1307515]	-2.75108	9.9e-06	0.00097	7.45	19.9
Cetn3	centrin 3 [Source:RGD Symbol;Acc:620249]	-2.77022	0.00055	0.028	2.92	8.03
AABR07006310.1	macrophage expressed 1 [Source:NCBI gene;Acc:64552]	-2.77022	1.5e-05	0.0014	7.02	19.34
Xiap	X-linked inhibitor of apoptosis [Source:RGD Symbol;Acc:620692]	-2.77022	0.00051	0.026	0.97	2.75
Slc46a1	solute carrier family 46 member 1 [Source:RGD Symbol;Acc:1309472]	-2.80889	8.5e-06	0.00085	11.09	30.96
Duoxa1	dual oxidase maturation factor 1 [Source:RGD Symbol;Acc:1306601]	-2.80889	0.029	0.5	0.34	0.95
Mcm10	minichromosome maintenance 10 replication initiation factor [Source:RGD Symbol;Acc:1311330]	-2.80889	2.5e-05	0.0022	1.6	4.45
Vsig10	V-set and immunoglobulin domain containing 10 [Source:RGD Symbol;Acc:1565800]	-2.80889	0.00044	0.023	0.78	2.34
Atp2b2	ATPase plasma membrane Ca2+ transporting 2 [Source:RGD Symbol;Acc:2176]	-2.82843	3.5e-05	0.0029	0.82	2.29
Brms1l	BRMS1 like transcriptional repressor [Source:RGD Symbol;Acc:1306006]	-2.82843	0.0013	0.054	0.76	1.94
Npas2	neuronal PAS domain protein 2 [Source:RGD Symbol;Acc:1309681]	-2.8481	1.2e-05	0.0011	2.64	7.51
Mt1	metallothionein 1 [Source:RGD Symbol;Acc:3117]	-2.86791	6.5e-06	0.00067	103.79	298.15
AABR07064257.1	\N	-2.86791	0.015	0.34	0.1	0.29
Jmy	junction mediating and regulatory protein, p53 cofactor [Source:RGD Symbol;Acc:1585601]	-2.86791	0.03	0.51	0.16	0.46
Layn	layilin [Source:RGD Symbol;Acc:1564444]	-2.86791	0.03	0.51	0.16	0.34
Lims1	LIM zinc finger domain containing 1 [Source:RGD Symbol;Acc:1560732]	-2.86791	0.015	0.34	0.44	1.3
AABR07067267.1	\N	-2.86791	0.015	0.34	0.23	0.62
Amhr2	anti-Mullerian hormone receptor type 2 [Source:RGD Symbol;Acc:70964]	-2.86791	0.03	0.51	0.26	0.75
AABR07005031.1	\N	-2.86791	0.047	0.65	0.96	2.81
Ppfia2	PTPRF interacting protein alpha 2 [Source:RGD Symbol;Acc:1305021]	-2.86791	0.047	0.65	0.1	0.29
AABR07012775.1	\N	-2.86791	0.047	0.65	1.24	3.54
Amacr	alpha-methylacyl-CoA racemase [Source:RGD Symbol;Acc:3048]	-2.88786	2.6e-06	0.0003	123.46	354.81
Cd200	Cd200 molecule [Source:RGD Symbol;Acc:3104]	-2.92817	0.021	0.41	0.26	0.9
Acmsd	aminocarboxymuconate semialdehyde decarboxylase [Source:RGD Symbol;Acc:620868]	-2.92817	0.0011	0.048	1.59	4.64
AABR07030091.1	\N	-2.94854	4.5e-05	0.0036	1.09	3.29
Fmod	fibromodulin [Source:RGD Symbol;Acc:619769]	-2.94854	0.032	0.53	0.11	0.34
Knstrn	kinetochore-localized astrin/SPAG5 binding protein [Source:RGD Symbol;Acc:1303240]	-2.94854	0.032	0.53	0.29	0.84
Rhbg	Rh family B glycoprotein [Source:RGD Symbol;Acc:727813]	-2.96905	0.00026	0.015	1.26	4.01
Ppm1k	protein phosphatase, Mg2+/Mn2+ dependent, 1K [Source:RGD Symbol;Acc:1308501]	-2.9897	3.1e-05	0.0026	2.15	7.39
Ca5b	carbonic anhydrase 5B [Source:RGD Symbol;Acc:1549783]	-2.9897	0.0027	0.1	0.38	1.12
LOC100910526	sulfotransferase 1C2-like [Source:RGD Symbol;Acc:6497849]	-3.01049	5.9e-06	0.00063	3.37	10.03
LOC689065	RIKEN cDNA 2010003K11 gene [Source:MGI Symbol;Acc:MGI:1917111]	-3.01049	0.022	0.42	0.44	1.32
Slc30a2	solute carrier family 30 member 2 [Source:RGD Symbol;Acc:3707]	-3.01049	6.7e-05	0.0051	0.93	2.8
Apol3	apolipoprotein L, 3 [Source:RGD Symbol;Acc:1306480]	-3.01049	1.8e-05	0.0016	3.95	11.98
LOC501233	LRRGT00080 [Source:RGD Symbol;Acc:1564453]	-3.03143	8.8e-07	0.00011	397.73	1170.53
Bace1	beta-secretase 1 [Source:RGD Symbol;Acc:2191]	-3.03143	0.00067	0.033	0.68	2.05
Olr1353	olfactory receptor 1353 [Source:RGD Symbol;Acc:1333848]	-3.05252	2.7e-05	0.0023	4.75	14.42
Atp11c	ATPase phospholipid transporting 11C [Source:RGD Symbol;Acc:1564481]	-3.05252	2.2e-05	0.002	1.23	3.73
Nxpe5	neurexophilin and PC-esterase domain family, member 5 [Source:RGD Symbol;Acc:1588255]	-3.05252	0.016	0.34	0.35	1.06
Mob1b	MOB kinase activator 1B [Source:RGD Symbol;Acc:1305114]	-3.05252	0.00083	0.039	0.46	1.4
Hsd3b3	hydroxy-delta-5-steroid dehydrogenase, 3 beta- and steroid delta-isomerase 3 [Source:RGD Symbol;Acc:1592771]	-3.05252	0.016	0.34	0.53	1.59
LOC100362999	hsc70-interacting protein-like [Source:RGD Symbol;Acc:2323695]	-3.05252	0.033	0.54	0.24	0.74
LOC685067	similar to guanylate binding protein family, member 6 [Source:RGD Symbol;Acc:1583235]	-3.09513	0.0001	0.0074	1.32	4.05
Uchl3	ubiquitin C-terminal hydrolase L3 [Source:RGD Symbol;Acc:1561196]	-3.09513	0.0021	0.083	1.98	5.98
Arntl	aryl hydrocarbon receptor nuclear translocator-like [Source:RGD Symbol;Acc:62003]	-3.11666	4.2e-06	0.00046	2.56	7.94
Ceacam4	CEA cell adhesion molecule 4 [Source:RGD Symbol;Acc:708435]	-3.11666	0.023	0.42	0.74	2.34
Naip2	NLR family, apoptosis inhibitory protein 2 [Source:MGI Symbol;Acc:MGI:1298226]	-3.11666	0.023	0.42	0.06	0.2
Lrrk2	leucine-rich repeat kinase 2 [Source:RGD Symbol;Acc:1561168]	-3.11666	0.023	0.42	0.05	0.15
LOC100362342	rCG47764-like [Source:RGD Symbol;Acc:2318344]	-3.11666	0.023	0.42	0.7	2.16
Akr1c2	aldo-keto reductase family 1, member C2 [Source:RGD Symbol;Acc:1311841]	-3.16017	8.9e-06	0.00088	3.93	12.46
LOC108349189	high mobility group protein B1 pseudogene [Source:RGD Symbol;Acc:11468204]	-3.16017	0.00022	0.014	3.93	12.22
Odf3b	outer dense fiber of sperm tails 3B [Source:RGD Symbol;Acc:1564322]	-3.16017	2.6e-05	0.0023	4.03	12.71
Itgb3	integrin subunit beta 3 [Source:RGD Symbol;Acc:628868]	-3.16017	0.0051	0.16	0.39	1.16
Abhd2	abhydrolase domain containing 2 [Source:RGD Symbol;Acc:1311389]	-3.20428	7.8e-07	0.0001	9.69	28.08
Stxbp4	syntaxin binding protein 4 [Source:RGD Symbol;Acc:1307903]	-3.22657	0.005	0.16	0.32	1
AABR07049503.1	\N	-3.24901	0.023	0.43	0.74	2.39
AABR07047899.1	\N	-3.27161	0.00042	0.023	3.46	11.27
Kif20a	kinesin family member 20A [Source:RGD Symbol;Acc:1307695]	-3.31728	0.0064	0.19	0.18	0.6
Fam169b	family with sequence similarity 169, member B [Source:RGD Symbol;Acc:1585883]	-3.34035	2.1e-06	0.00025	1.8	5.98
Cyp4f39	cytochrome P450, family 4, subfamily f, polypeptide 39 [Source:RGD Symbol;Acc:1308796]	-3.34035	2e-06	0.00024	2.14	7.07
MGC94199	similar to RIKEN cDNA 2610301B20; EST AI428449 [Source:RGD Symbol;Acc:1549749]	-3.34035	0.00014	0.0097	0.83	2.75
Car1	carbonic anhydrase 1 [Source:RGD Symbol;Acc:1309780]	-3.34035	2.5e-05	0.0022	2.53	8.39
Ncam2	neural cell adhesion molecule 2 [Source:RGD Symbol;Acc:1303131]	-3.34035	0.0038	0.13	0.16	0.63
Rnf144a	ring finger protein 144A [Source:RGD Symbol;Acc:1561737]	-3.34035	0.0024	0.09	0.14	0.48
Acnat1	acyl-coenzyme A amino acid N-acyltransferase 1 [Source:RGD Symbol;Acc:1584701]	-3.34035	0.0038	0.13	0.58	1.94
Aox3	aldehyde oxidase 3 [Source:RGD Symbol;Acc:1359328]	-3.38698	1.5e-07	2.4e-05	7.07	24.88
Dhrs7l1	dehydrogenase/reductase (SDR family) member 7-like 1 [Source:RGD Symbol;Acc:1308036]	-3.41054	6.5e-08	1.1e-05	151.06	479.53
Fmo1	flavin containing dimethylaniline monoxygenase 1 [Source:RGD Symbol;Acc:2622]	-3.41054	1.1e-07	1.8e-05	14.68	48.5
Noct	nocturnin [Source:RGD Symbol;Acc:1587344]	-3.43426	1.8e-06	0.00022	1.83	6.25
AABR07054400.1	cyclic nucleotide binding domain containing 2 [Source:NCBI gene;Acc:296311]	-3.43426	0.047	0.65	0.09	0.32
RGD1564053	RIKEN cDNA A830018L16 gene [Source:MGI Symbol;Acc:MGI:2444149]	-3.43426	0.047	0.65	0.08	0.26
Cend1	cell cycle exit and neuronal differentiation 1 [Source:RGD Symbol;Acc:1309401]	-3.43426	0.0047	0.15	0.34	1.13
Synpo2	synaptopodin 2 [Source:RGD Symbol;Acc:1564779]	-3.43426	0.047	0.65	0.07	0.24
Bmerb1	bMERB domain containing 1 [Source:RGD Symbol;Acc:1305733]	-3.43426	0.012	0.28	0.23	0.79
AABR07043822.1	\N	-3.43426	0.0018	0.073	2.54	8.73
Trim43a	tripartite motif-containing 43A [Source:RGD Symbol;Acc:1561074]	-3.43426	0.047	0.65	0.24	0.82
Mcc	MCC regulator of WNT signaling pathway [Source:RGD Symbol;Acc:1561988]	-3.5801	0.00061	0.031	0.32	1.16
Mup5	major urinary protein 5 [Source:RGD Symbol;Acc:735107]	-3.605	1.5e-08	3e-06	1154.58	4153.04
Lgsn	lengsin, lens protein with glutamine synthetase domain [Source:RGD Symbol;Acc:727925]	-3.605	0.00072	0.035	0.45	1.62
St6galnac3	ST6 N-acetylgalactosaminide alpha-2,6-sialyltransferase 3 [Source:RGD Symbol;Acc:3677]	-3.605	0.0083	0.23	0.19	0.58
RT1-M2	RT1 class Ib, locus M2 [Source:RGD Symbol;Acc:3493]	-3.65533	0.033	0.54	0.3	1.1
Fli1	Fli-1 proto-oncogene, ETS transcription factor [Source:RGD Symbol;Acc:1309837]	-3.65533	0.033	0.54	0.17	0.62
LOC298111	alpha2u globulin [Source:RGD Symbol;Acc:1593272]	-3.68075	1.3e-08	2.6e-06	176.16	647.64
St8sia1	ST8 alpha-N-acetyl-neuraminide alpha-2,8-sialyltransferase 1 [Source:RGD Symbol;Acc:3679]	-3.73213	0.00033	0.018	0.55	2.04
G6pc	glucose-6-phosphatase, catalytic subunit [Source:RGD Symbol;Acc:2644]	-3.73213	7.8e-09	1.7e-06	111.8	406.88
LOC102554283	A disintegrin and metalloproteinase with thrombospondin motifs 13-like [Source:RGD Symbol;Acc:7617739]	-3.73213	0.001	0.046	0.42	1.63
Tle3	TLE family member 3, transcriptional corepressor [Source:RGD Symbol;Acc:620292]	-3.73213	3.7e-06	0.00041	0.5	1.88
Nrep	neuronal regeneration related protein [Source:RGD Symbol;Acc:631411]	-3.75809	1.8e-06	0.00021	11.8	44.31
Fer1l5	fer-1-like family member 5 [Source:RGD Symbol;Acc:1583681]	-3.75809	5.9e-07	8.1e-05	0.58	2.16
Slc25a48	solute carrier family 25, member 48 [Source:RGD Symbol;Acc:1563703]	-3.78423	0.0015	0.062	0.78	2.94
Efna5	ephrin A5 [Source:RGD Symbol;Acc:620391]	-3.81055	0.0019	0.074	1.1	4.18
Ccdc146	coiled-coil domain containing 146 [Source:RGD Symbol;Acc:1559535]	-3.81055	0.0003	0.017	0.3	1.15
Slc17a4	solute carrier family 17, member 4 [Source:RGD Symbol;Acc:1584758]	-3.86375	2e-08	3.9e-06	3.58	13.97
Pygb	glycogen phosphorylase B [Source:RGD Symbol;Acc:3460]	-3.89062	0.023	0.43	0.07	0.27
Prph	peripherin [Source:RGD Symbol;Acc:3414]	-3.89062	0.023	0.43	0.18	0.69
Slc13a5	solute carrier family 13 member 5 [Source:RGD Symbol;Acc:631374]	-3.91768	4.8e-08	8.8e-06	1.86	7.25
Igf2bp3	insulin-like growth factor 2 mRNA binding protein 3 [Source:RGD Symbol;Acc:1306512]	-3.97237	0.00031	0.017	0.39	1.53
Nox4	NADPH oxidase 4 [Source:RGD Symbol;Acc:620600]	-3.97237	8.8e-09	1.9e-06	3.08	12.2
Togaram2	TOG array regulator of axonemal microtubules 2 [Source:RGD Symbol;Acc:1310677]	-3.97237	1.1e-05	0.001	0.49	1.95
Ptk6	protein tyrosine kinase 6 [Source:RGD Symbol;Acc:1309098]	-4	0.0055	0.17	0.17	0.68
Cib2	calcium and integrin binding family member 2 [Source:RGD Symbol;Acc:1308718]	-4	0.00013	0.0091	0.74	2.93
AABR07026377.1	\N	-4	0.00035	0.019	0.48	1.91
AC114845.1	\N	-4.05584	0.00015	0.0099	0.77	3.15
Hao2	hydroxyacid oxidase 2 [Source:RGD Symbol;Acc:70972]	-4.08405	8.2e-10	2.2e-07	97.31	394.36
Slc22a8	solute carrier family 22 member 8 [Source:RGD Symbol;Acc:632286]	-4.11246	7.9e-10	2.1e-07	34.63	141.61
LOC500473	similar to alpha-2u globulin PGCL2 [Source:RGD Symbol;Acc:1583727]	-4.14106	5.5e-10	1.5e-07	163.58	676.55
Slc1a2	solute carrier family 1 member 2 [Source:RGD Symbol;Acc:3697]	-4.19887	9.2e-05	0.0067	1.23	5.17
Mup4	major urinary protein 4 [Source:RGD Symbol;Acc:735211]	-4.19887	5e-10	1.4e-07	72.67	304.68
LOC108348108	heat shock 70 kDa protein 1A [Source:RGD Symbol;Acc:11425585]	-4.19887	8.4e-07	0.00011	1.09	4.13
Rgn	regucalcin [Source:RGD Symbol;Acc:3560]	-4.19887	4e-10	1.2e-07	126.41	527.45
Spock1	sparc/osteonectin, cwcv and kazal like domains proteoglycan 1 [Source:RGD Symbol;Acc:1311496]	-4.28709	0.023	0.43	0.17	0.73
Prtg	protogenin [Source:RGD Symbol;Acc:1307157]	-4.28709	0.023	0.43	0.04	0.18
AABR07014855.1	\N	-4.34694	0.011	0.28	0.64	2.77
Acpp	acid phosphatase, prostate [Source:RGD Symbol;Acc:2023]	-4.40762	2.3e-08	4.4e-06	0.8	3.6
LOC259244	alpha-2u globulin PGCL3 [Source:RGD Symbol;Acc:708501]	-4.40762	1.1e-10	3.5e-08	2586.85	11318
Gnat2	G protein subunit alpha transducin 2 [Source:RGD Symbol;Acc:1309514]	-4.40762	0.0011	0.047	0.29	1.29
RGD1559960	similar to Sulfotransferase K1 (rSULT1C2) [Source:RGD Symbol;Acc:1559960]	-4.43828	5e-10	1.4e-07	6.09	25.89
RGD1566134	similar to alpha-2u-globulin [Source:RGD Symbol;Acc:1566134]	-4.43828	1e-10	3.5e-08	163.58	720.91
Marveld1	MARVEL domain containing 1 [Source:RGD Symbol;Acc:1309811]	-4.46915	2.2e-10	7e-08	7.79	34.59
Slc13a4	solute carrier family 13 member 4 [Source:RGD Symbol;Acc:1359715]	-4.46915	6.8e-10	1.9e-07	5.31	23.69
NEWGENE_1582994	DCN1, defective in cullin neddylation 1, domain containing 2 [Source:RGD Symbol;Acc:9432541]	-4.53154	2.5e-07	3.7e-05	0.7	3.21
Cyp7b1	cytochrome P450 family 7 subfamily B member 1 [Source:RGD Symbol;Acc:2483]	-4.53154	1.4e-09	3.5e-07	3.15	14.06
Il17re	interleukin 17 receptor E [Source:RGD Symbol;Acc:735148]	-4.59479	0.034	0.55	0.06	0.26
RGD1306474	similar to RIKEN cDNA 9530003J23 [Source:RGD Symbol;Acc:1306474]	-4.59479	0.016	0.34	0.21	0.95
Kif22	kinesin family member 22 [Source:RGD Symbol;Acc:1311886]	-4.59479	0.016	0.34	0.1	0.47
Parpbp	PARP1 binding protein [Source:RGD Symbol;Acc:2314264]	-4.59479	0.0033	0.12	0.07	0.32
Abhd10	abhydrolase domain containing 10 [Source:RGD Symbol;Acc:1308084]	-4.59479	0.016	0.34	0.17	0.82
Oat	ornithine aminotransferase [Source:RGD Symbol;Acc:621724]	-4.78991	1.5e-11	5.6e-09	30.03	142.89
Sox12	SRY-box transcription factor 12 [Source:RGD Symbol;Acc:1586313]	-4.82323	0.0023	0.086	0.34	1.63
Ly6al	lymphocyte antigen 6 complex, locus A-like [Source:RGD Symbol;Acc:1307571]	-4.85678	0.011	0.27	0.47	1.98
Ms4a6bl	membrane-spanning 4-domains, subfamily A, member 6B-like [Source:RGD Symbol;Acc:1359381]	-4.85678	0.00025	0.015	0.39	1.86
AABR07037995.1	\N	-4.95883	0.023	0.42	0.12	0.62
Ror2	receptor tyrosine kinase-like orphan receptor 2 [Source:RGD Symbol;Acc:1305275]	-4.95883	0.023	0.42	0.04	0.22
C1qtnf3	C1q and TNF related 3 [Source:RGD Symbol;Acc:1305010]	-4.95883	0.023	0.42	0.1	0.48
Kcnj3	potassium inwardly-rectifying channel, subfamily J, member 3 [Source:RGD Symbol;Acc:2958]	-4.95883	0.023	0.42	0.1	0.5
LOC108348055	B9 domain-containing protein 1 [Source:RGD Symbol;Acc:11475921]	-5.16941	2.9e-06	0.00033	1.63	8.17
AABR07069371.1	\N	-5.16941	0.0073	0.21	0.05	0.23
Arntl2	aryl hydrocarbon receptor nuclear translocator-like 2 [Source:RGD Symbol;Acc:620230]	-5.35171	0.0003	0.017	0.25	1.33
Atrnl1	attractin like 1 [Source:RGD Symbol;Acc:1563485]	-5.35171	0.015	0.33	0.02	0.13
Il10ra	interleukin 10 receptor subunit alpha [Source:RGD Symbol;Acc:620138]	-5.35171	0.015	0.33	0.09	0.49
Adora2b	adenosine A2B receptor [Source:RGD Symbol;Acc:2050]	-5.35171	0.015	0.33	0.1	0.53
Ttc24	tetratricopeptide repeat domain 24 [Source:RGD Symbol;Acc:2319887]	-5.35171	0.015	0.33	0.21	1.13
Cers3	ceramide synthase 3 [Source:RGD Symbol;Acc:1564356]	-5.35171	0.015	0.33	0.06	0.34
LOC108348276	ankyrin repeat family A protein 2 [Source:RGD Symbol;Acc:11492057]	-5.46416	2.2e-06	0.00026	0.43	2.41
Cytip	cytohesin 1 interacting protein [Source:RGD Symbol;Acc:1307990]	-5.57897	3.8e-08	7e-06	0.87	4.83
Pla2g4c	phospholipase A2 group IVC [Source:RGD Symbol;Acc:1594658]	-5.57897	5.1e-05	0.004	0.12	0.72
Ca3	carbonic anhydrase 3 [Source:RGD Symbol;Acc:2241]	-5.6962	7.5e-14	3.9e-11	372.62	2109.78
Cdkl4	cyclin-dependent kinase-like 4 [Source:RGD Symbol;Acc:1583704]	-5.73582	0.033	0.54	0.17	0.96
Atp10a	ATPase phospholipid transporting 10A (putative) [Source:RGD Symbol;Acc:1306150]	-5.73582	0.033	0.54	0.02	0.13
AABR07024542.1	\N	-5.73582	0.033	0.54	0.03	0.17
Irf5	interferon regulatory factor 5 [Source:RGD Symbol;Acc:1310447]	-5.93809	0.00023	0.014	0.15	0.88
LOC100910275	integral membrane protein DGCR2/IDD-like [Source:RGD Symbol;Acc:6499160]	-5.93809	0.00023	0.014	0.15	0.88
Rlim	ring finger protein, LIM domain interacting [Source:RGD Symbol;Acc:1559832]	-6.10504	9.4e-07	0.00012	0.44	2.08
Adcy10	adenylate cyclase 10 [Source:RGD Symbol;Acc:708450]	-6.10504	0.0064	0.19	0.03	0.21
Ppp4r4	protein phosphatase 4, regulatory subunit 4 [Source:RGD Symbol;Acc:1560932]	-6.10504	0.0064	0.19	0.05	0.3
Dennd1b	DENN domain containing 1B [Source:RGD Symbol;Acc:1308441]	-6.32033	0.021	0.41	0.11	0.71
Slc1a7	solute carrier family 1 member 7 [Source:RGD Symbol;Acc:1311928]	-6.32033	0.021	0.41	0.04	0.27
Tgm4	transglutaminase 4 [Source:RGD Symbol;Acc:620785]	-6.32033	0.021	0.41	0.04	0.26
Mest	mesoderm specific transcript [Source:RGD Symbol;Acc:1594589]	-6.32033	0.021	0.41	0.14	0.88
LOC100912427	nuclease-sensitive element-binding protein 1-like [Source:RGD Symbol;Acc:6486912]	-6.49802	0.0042	0.14	0.21	1.43
Sult1c2	sulfotransferase family 1C member 2 [Source:RGD Symbol;Acc:621064]	-6.86852	0.00071	0.035	0.07	0.53
AABR07044049.1	\N	-6.86852	0.037	0.56	0	0.06
Lrrc4c	leucine rich repeat containing 4C [Source:RGD Symbol;Acc:1311013]	-6.86852	0.0028	0.1	0.08	0.55
Mastl	microtubule associated serine/threonine kinase-like [Source:RGD Symbol;Acc:1309186]	-6.86852	0.037	0.56	0	0.07
Bbx	BBX high mobility group box domain containing [Source:RGD Symbol;Acc:1309769]	-6.86852	0.037	0.56	0	0.13
LOC103690020	platelet glycoprotein 4-like [Source:RGD Symbol;Acc:9322705]	-6.86852	0.037	0.56	0	0.3
Cgas	cyclic GMP-AMP synthase [Source:RGD Symbol;Acc:1586939]	-6.86852	0.037	0.56	0	0.28
Abcg8	ATP binding cassette subfamily G member 8 [Source:RGD Symbol;Acc:620300]	-6.9163	8.9e-10	2.3e-07	0.28	1.63
Nim1k	NIM1 serine/threonine protein kinase [Source:RGD Symbol;Acc:1308116]	-6.9644	3.8e-10	1.2e-07	0.58	4.03
Amdhd1	amidohydrolase domain containing 1 [Source:RGD Symbol;Acc:1308879]	-7.26015	1.9e-15	1.2e-12	3.81	27.43
Inmt	indolethylamine N-methyltransferase [Source:RGD Symbol;Acc:1597087]	-7.31065	7.7e-15	4.4e-12	5.47	39.86
Aldh1b1	aldehyde dehydrogenase 1 family, member B1 [Source:RGD Symbol;Acc:1306737]	-7.3615	6.2e-11	2.2e-08	0.66	4.85
AABR07048427.1	\N	-7.46426	0.0083	0.23	0.34	2.47
Gpr37	G protein-coupled receptor 37 [Source:RGD Symbol;Acc:619848]	-8	0.0052	0.16	0.04	0.29
LOC100911109	sperm-associated antigen 4 protein-like [Source:RGD Symbol;Acc:6495088]	-8	0.02	0.39	0	0.39
AABR07065602.2	\N	-8	0.02	0.39	0	0.17
LOC100359539	ribonucleotide reductase M2 polypeptide [Source:RGD Symbol;Acc:2323655]	-8	0.00011	0.0076	0.09	0.75
LOC100911402	cell cycle exit and neuronal differentiation protein 1-like [Source:RGD Symbol;Acc:6493217]	-8	0.02	0.39	0	1.99
AABR07060678.1	\N	-8	0.02	0.39	0	0.08
Sytl2	synaptotagmin-like 2 [Source:RGD Symbol;Acc:1307647]	-8	0.02	0.39	0	0.5
AABR07004530.1	\N	-8	0.02	0.39	0	0.41
Gzmc	granzyme C [Source:RGD Symbol;Acc:620019]	-9.18959	0.011	0.27	0	0.76
Unc5d	unc-5 netrin receptor D [Source:RGD Symbol;Acc:1309245]	-9.18959	0.049	0.67	0.02	0.18
Nkx1-2	NK1 homeobox 2 [Source:RGD Symbol;Acc:1306744]	-9.18959	0.011	0.27	0	0.71
Tmem170b	transmembrane protein 170B [Source:RGD Symbol;Acc:1561506]	-9.18959	0.049	0.67	0.08	0.69
LOC108348173	protein arginine N-methyltransferase 6 [Source:RGD Symbol;Acc:11469917]	-9.18959	0.011	0.27	0	0.37
AABR07068044.2	\N	-9.18959	0.011	0.27	0	2.4
Mroh9	maestro heat-like repeat family member 9 [Source:RGD Symbol;Acc:1564745]	-9.18959	0.049	0.67	0.02	0.19
Slc1a3	solute carrier family 1 member 3 [Source:RGD Symbol;Acc:3698]	-9.64646	6.7e-07	9.1e-05	0.08	0.72
AABR07068043.1	\N	-9.84916	3.4e-07	4.9e-05	0.33	3.19
Adam33	ADAM metallopeptidase domain 33 [Source:RGD Symbol;Acc:1305278]	-10.3388	0.029	0.5	0.03	0.26
Mpped1	metallophosphoesterase domain containing 1 [Source:RGD Symbol;Acc:1308244]	-10.3388	0.029	0.5	0.02	0.15
Plppr1	phospholipid phosphatase related 1 [Source:RGD Symbol;Acc:1303116]	-10.3388	0.029	0.5	0.07	0.38
AABR07035780.2	\N	-10.3388	0.029	0.5	0.04	0.38
Cenpt	centromere protein T [Source:RGD Symbol;Acc:1309383]	-10.3388	0.029	0.5	0.03	0.27
Pbsn	probasin [Source:RGD Symbol;Acc:708571]	-10.3388	0.029	0.5	0.1	1.05
Spock2	SPARC/osteonectin, cwcv and kazal like domains proteoglycan 2 [Source:RGD Symbol;Acc:1308568]	-10.3388	0.029	0.5	0.05	0.53
AABR07028009.1	proteasome (prosome, macropain) activator subunit 1 (PA28 alpha), pseudo 1 [Source:NCBI gene;Acc:685197]	-10.5561	1.2e-07	2e-05	0.52	5.43
Slc6a6	solute carrier family 6 member 6 [Source:RGD Symbol;Acc:61912]	-10.6295	4.1e-09	9.4e-07	0.17	1.81
Pde8b	phosphodiesterase 8B [Source:RGD Symbol;Acc:735041]	-10.8528	0.00053	0.028	0.05	0.51
LOC103694381	lymphotoxin-beta [Source:RGD Symbol;Acc:9083628]	-11.4716	0.0018	0.07	0	0.58
Prss12	serine protease 12 [Source:RGD Symbol;Acc:69238]	-11.4716	0.0018	0.07	0	0.27
AABR07037302.1	\N	-11.4716	0.0018	0.07	0	0.79
AABR07027088.1	\N	-11.4716	0.0018	0.07	0	2.61
LOC100360095	urinary protein 1-like [Source:RGD Symbol;Acc:2322852]	-12.1257	1.2e-24	2.1e-21	502.94	6105.55
Aldh18a1	aldehyde dehydrogenase 18 family, member A1 [Source:RGD Symbol;Acc:1311431]	-12.6407	0.00098	0.044	0	0.22
LOC691254	hypothetical protein LOC691254 [Source:RGD Symbol;Acc:1586256]	-12.6407	0.00098	0.044	0	0.4
Fat4	FAT atypical cadherin 4 [Source:RGD Symbol;Acc:1564291]	-12.6407	0.0061	0.18	0	0.04
AABR07035782.1	\N	-12.6407	0.0061	0.18	0.04	0.45
AABR07035780.1	\N	-12.6407	0.00098	0.044	0	0.57
Nudt11	nudix hydrolase 11 [Source:RGD Symbol;Acc:1594183]	-12.6407	0.00098	0.044	0	2.41
Cyb5d1	cytochrome b5 domain containing 1 [Source:RGD Symbol;Acc:1559567]	-13.737	0.0037	0.12	0.12	1.6
LOC103690044	glutathione S-transferase omega-2 [Source:RGD Symbol;Acc:9449876]	-13.737	0.00055	0.028	0	0.93
Napepld	N-acyl phosphatidylethanolamine phospholipase D [Source:RGD Symbol;Acc:735197]	-13.737	0.0037	0.12	0.06	0.73
AABR07048421.1	\N	-14.9285	0.0022	0.084	0.05	0.53
Map2k3	mitogen activated protein kinase kinase 3 [Source:RGD Symbol;Acc:1306620]	-15.1369	2.9e-20	2.7e-17	0.69	10.62
Sds	serine dehydratase [Source:RGD Symbol;Acc:67376]	-15.8895	9.1e-28	2.9e-24	14.98	232.73
Wdr86	WD repeat domain 86 [Source:RGD Symbol;Acc:1566180]	-16	0.00018	0.011	0	0.66
AABR07037307.1	\N	-16.4498	1.8e-16	1.4e-13	1.34	21.9
Slc29a4	solute carrier family 29 member 4 [Source:RGD Symbol;Acc:1310545]	-19.4271	0.00029	0.017	0.03	0.49
Cyp3a9	cytochrome P450, family 3, subfamily a, polypeptide 9 [Source:RGD Symbol;Acc:708392]	-19.6983	3e-20	2.7e-17	0.59	11.56
Slc22a6	solute carrier family 22 member 6 [Source:RGD Symbol;Acc:69338]	-21.7057	0.00011	0.0078	0.03	0.59
LOC685767	similar to OX-2 membrane glycoprotein precursor (MRC OX-2 antigen) (CD200 antigen) [Source:RGD Symbol;Acc:1590201]	-21.7057	0.00011	0.0078	0.03	0.63
AABR07003056.1	\N	-21.7057	1.2e-05	0.0011	0	0.83
NEWGENE_621351	collagen, type I, alpha 2 [Source:RGD Symbol;Acc:9452897]	-27.4741	2.3e-09	5.5e-07	0.03	0.71
Yme1l1	YME1-like 1 ATPase [Source:RGD Symbol;Acc:620764]	-30.91	2.3e-07	3.6e-05	0	0.87
Mmd2	monocyte to macrophage differentiation-associated 2 [Source:RGD Symbol;Acc:1306506]	-32	9.2e-08	1.5e-05	0	0.9
LOC100911994	coiled-coil domain-containing protein 132-like [Source:RGD Symbol;Acc:6489220]	-32	9.2e-08	1.5e-05	0	2.14
Lox	lysyl oxidase [Source:RGD Symbol;Acc:3015]	-35.0174	2.4e-37	1.3e-33	0.79	27.54
RT1-DMa	RT1 class II, locus DMa [Source:RGD Symbol;Acc:735053]	-35.5062	1.6e-11	5.8e-09	0.4	4.64
AABR07004572.1	\N	-37.2715	2.5e-20	2.5e-17	0.11	4.25
Tenm2	teneurin transmembrane protein 2 [Source:RGD Symbol;Acc:727907]	-40.2244	5.7e-08	1e-05	0.01	0.24
Miip	migration and invasion inhibitory protein [Source:RGD Symbol;Acc:1587376]	-40.2244	4.1e-09	9.4e-07	0	2.32
Stac3	SH3 and cysteine rich domain 3 [Source:RGD Symbol;Acc:1308964]	-47.1766	2.2e-43	1.8e-39	3.54	166.32
Rfxapl1	regulatory factor X-associated protein-like 1 [Source:RGD Symbol;Acc:9303218]	-147.033	9.4e-22	1.2e-18	0	5.56
Sccpdh	saccharopine dehydrogenase (putative) [Source:RGD Symbol;Acc:1311440]	-1360.57	3e-56	4.8e-52	0	44.8

## Sheet: Old-CR vs Old
Gene	Desc	FC	p-value	q-value	Old_CR TPM	Old TPM
Sccpdh	saccharopine dehydrogenase (putative) [Source:RGD Symbol;Acc:1311440]	786.88	1.4e-49	1.1e-45	28.05	0
Ascl1	achaete-scute family bHLH transcription factor 1 [Source:RGD Symbol;Acc:71010]	385.343	2.2e-37	8.9e-34	17.56	0
LOC108348081	CD99 antigen-like protein 2 [Source:RGD Symbol;Acc:11437172]	137.187	4.6e-22	8.3e-19	3.66	0
Snip1	Smad nuclear interacting protein 1 [Source:RGD Symbol;Acc:1359268]	114.563	8.2e-20	1.1e-16	2.98	0
AABR07058124.2	\N	110.661	2.2e-19	2.6e-16	6.5	0
A1bg	alpha-1-B glycoprotein [Source:RGD Symbol;Acc:69417]	107.635	8.3e-50	1.1e-45	64.76	0.56
Cracr2b	calcium release activated channel regulator 2B [Source:RGD Symbol;Acc:1560911]	88.647	9.2e-17	7e-14	3.79	0
Nrg4	neuregulin 4 [Source:RGD Symbol;Acc:1589860]	36.5044	1.9e-20	2.8e-17	19.63	0.51
5_8S_rRNA	5.8S ribosomal RNA [Source:RFAM;Acc:RF00002]	36.5044	5.1e-09	1.5e-06	956.95	0
RT1-DMa	RT1 class II, locus DMa [Source:RGD Symbol;Acc:735053]	32.2226	2.7e-11	1.1e-08	4.53	0.4
Gstm3	glutathione S-transferase mu 3 [Source:RGD Symbol;Acc:11402080]	32.2226	4.9e-08	1.1e-05	2.52	0
Spsb2	splA/ryanodine receptor domain and SOCS box containing 2 [Source:RGD Symbol;Acc:1310854]	22.9433	4e-06	0.00054	1.31	0
AABR07034273.1	N-alpha-acetyltransferase 50-like [Source:NCBI gene;Acc:102553099]	22.9433	4e-06	0.00054	4.7	0
Rasd2	RASD family, member 2 [Source:RGD Symbol;Acc:628594]	19.8353	1.9e-05	0.0022	0.36	0
LOC100912399	mitogen-activated protein kinase kinase kinase 1-like [Source:RGD Symbol;Acc:6487511]	19.8353	1.9e-05	0.0022	0.3	0
Cyp2c12	cytochrome P450, family 2, subfamily c, polypeptide 12 [Source:RGD Symbol;Acc:2470]	19.0273	2.3e-33	7.3e-30	700.55	34.41
NEWGENE_621351	collagen, type I, alpha 2 [Source:RGD Symbol;Acc:9452897]	17.1484	1.1e-06	0.00019	0.47	0.03
Fras1	Fraser extracellular matrix complex subunit 1 [Source:RGD Symbol;Acc:1306516]	16	7.2e-15	4.8e-12	0.74	0.04
AABR07070810.1	ribosomal protein L12, pseudo 1 [Source:NCBI gene;Acc:296644]	14.6213	1.4e-05	0.0017	6.24	0.4
Krt23	keratin 23 [Source:RGD Symbol;Acc:1308838]	13.5479	3.4e-05	0.0037	1.51	0.1
Lifr	LIF receptor subunit alpha [Source:RGD Symbol;Acc:621431]	13.3614	3.4e-19	3.4e-16	3.79	0.26
LOC103694863	ras-like protein family member 10B [Source:RGD Symbol;Acc:9359312]	12.4666	0.00095	0.051	0.94	0
LOC100910308	multifunctional protein ADE2-like [Source:RGD Symbol;Acc:6499293]	12.4666	0.00095	0.051	0.82	0
AABR07028989.1	\N	12.4666	0.00095	0.051	0.44	0
Snph	syntaphilin [Source:RGD Symbol;Acc:1305867]	12.4666	0.006	0.2	0.16	0.01
Nat8f3	N-acetyltransferase 8 (GCN5-related) family member 3 [Source:RGD Symbol;Acc:621607]	11.7942	3.7e-06	0.00051	4.44	0.35
Vdr	vitamin D receptor [Source:RGD Symbol;Acc:3959]	11.4716	3.8e-07	7.2e-05	0.63	0.05
Entpd7	ectonucleoside triphosphate diphosphohydrolase 7 [Source:RGD Symbol;Acc:1310638]	11.4716	0.0002	0.015	0.61	0.04
Abl1	ABL proto-oncogene 1, non-receptor tyrosine kinase [Source:RGD Symbol;Acc:1584969]	11.4716	0.0017	0.08	0.22	0
LOC100909732	protein FAM122B-like [Source:RGD Symbol;Acc:6501955]	11.4716	0.0017	0.08	0.21	0
Cers1	ceramide synthase 1 [Source:RGD Symbol;Acc:1305974]	11.4716	0.0017	0.08	0.27	0
Ntrk1	neurotrophic receptor tyrosine kinase 1 [Source:RGD Symbol;Acc:620144]	11.0809	8.1e-06	0.001	0.81	0.07
Mmd2	monocyte to macrophage differentiation-associated 2 [Source:RGD Symbol;Acc:1306506]	10.4107	0.0031	0.12	0.32	0
LOC100911994	coiled-coil domain-containing protein 132-like [Source:RGD Symbol;Acc:6489220]	10.4107	0.0031	0.12	0.76	0
Aldh18a1	aldehyde dehydrogenase 18 family, member A1 [Source:RGD Symbol;Acc:1311431]	10.4107	0.0031	0.12	0.19	0
AABR07044049.1	\N	10.4107	0.0031	0.12	0.1	0
Mesp2	mesoderm posterior bHLH transcription factor 2 [Source:RGD Symbol;Acc:1305959]	10.4107	0.0031	0.12	0.37	0
Ighg1	immunoglobulin heavy constant gamma 1 [Source:RGD Symbol;Acc:1359539]	10.4107	0.0031	0.12	0.81	0
LOC100911625	gamma-enolase-like [Source:RGD Symbol;Acc:6491529]	10.4107	0.0031	0.12	0.29	0
AC098547.2	\N	10.4107	0.0031	0.12	0.95	0
Cyb5d1	cytochrome b5 domain containing 1 [Source:RGD Symbol;Acc:1559567]	10.4107	0.017	0.41	1.31	0.12
Zfp366	zinc finger protein 366 [Source:RGD Symbol;Acc:2322904]	10.4107	0.017	0.41	0.18	0.02
Ttc30a1	tetratricopeptide repeat domain 30A1 [Source:RGD Symbol;Acc:1560121]	10.4107	0.017	0.41	0.28	0.02
AC127189.1	\N	10.4107	0.017	0.41	1.55	0.14
Akr1b7	aldo-keto reductase family 1, member B7 [Source:RGD Symbol;Acc:620257]	9.44794	1.6e-20	2.6e-17	93.33	9.23
LOC103694381	lymphotoxin-beta [Source:RGD Symbol;Acc:9083628]	9.38268	0.0057	0.2	0.51	0
LOC100911361	heterogeneous nuclear ribonucleoprotein A3-like [Source:RGD Symbol;Acc:6493616]	9.38268	0.0057	0.2	0.62	0
LOC100912228	pro-neuropeptide Y-like [Source:RGD Symbol;Acc:6487865]	9.38268	0.0057	0.2	1.44	0
AC123471.1	SWI/SNF related, matrix associated, actin dependent regulator of chromatin, subfamily e, member 1 [Source:NCBI gene;Acc:103694314]	9.38268	0.029	0.54	0.61	0.06
AABR07013202.1	\N	9.38268	0.029	0.54	0.85	0.09
Cux2	cut-like homeobox 2 [Source:RGD Symbol;Acc:1305967]	9.31787	1.2e-19	1.5e-16	14.52	1.46
Adcy10	adenylate cyclase 10 [Source:RGD Symbol;Acc:708450]	8.69388	0.00021	0.016	0.32	0.03
RGD1560242	similar to RIKEN cDNA 1700028P14 [Source:RGD Symbol;Acc:1560242]	8.33973	8.9e-08	2e-05	6.05	0.67
AABR07032255.2	\N	8.33973	0.0032	0.12	4.5	0.5
Nup214	nucleoporin 214 [Source:RGD Symbol;Acc:1304977]	8.33973	0.049	0.7	0.79	0.09
Nptx2	neuronal pentraxin 2 [Source:RGD Symbol;Acc:1309447]	7.4127	6.5e-07	0.00011	1.74	0.23
Ppp2r2b	protein phosphatase 2, regulatory subunit B, beta [Source:RGD Symbol;Acc:631441]	7.31065	0.008	0.24	0.57	0.07
Dnah8	dynein, axonemal, heavy chain 8 [Source:RGD Symbol;Acc:619986]	7.31065	0.02	0.43	0.03	0
Lrrc43	leucine rich repeat containing 43 [Source:RGD Symbol;Acc:1561461]	7.31065	0.02	0.43	0.18	0
NEWGENE_2724	glycoprotein V platelet [Source:RGD Symbol;Acc:11377642]	7.31065	0.02	0.43	0.21	0
AABR07072639.1	\N	7.31065	0.02	0.43	0.77	0
AABR07027272.1	\N	7.31065	0.02	0.43	0.25	0
AABR07066144.1	\N	7.31065	0.02	0.43	0.66	0
AABR07028997.1	\N	7.31065	0.02	0.43	1.11	0.03
LOC100365062	eukaryotic translation initiation factor 3, subunit 6 48kDa-like [Source:RGD Symbol;Acc:2319808]	7.31065	0.02	0.43	0.32	0
Prlr	prolactin receptor [Source:RGD Symbol;Acc:3407]	7.1602	1.1e-16	7.9e-14	70.35	9.23
Sult1c2	sulfotransferase family 1C member 2 [Source:RGD Symbol;Acc:621064]	7.01285	0.0003	0.021	0.59	0.07
LOC100912427	nuclease-sensitive element-binding protein 1-like [Source:RGD Symbol;Acc:6486912]	6.9163	0.0017	0.08	1.66	0.21
Osmr	oncostatin M receptor [Source:RGD Symbol;Acc:1302983]	6.82108	3.9e-08	9.1e-06	1.94	0.27
Daam2	dishevelled associated activator of morphogenesis 2 [Source:RGD Symbol;Acc:1306128]	6.77396	0.013	0.34	0.25	0.03
Abcg8	ATP binding cassette subfamily G member 8 [Source:RGD Symbol;Acc:620300]	6.58873	1e-09	3.3e-07	1.68	0.28
AABR07014550.1	\N	6.58873	0.0026	0.11	4.91	0.69
AABR07003187.1	\N	6.23332	0.02	0.44	0.84	0.14
Gzmc	granzyme C [Source:RGD Symbol;Acc:620019]	6.23332	0.037	0.6	0.56	0
Mapk13	mitogen activated protein kinase 13 [Source:RGD Symbol;Acc:3045]	6.23332	0.037	0.6	0.22	0
Lhx4	LIM homeobox 4 [Source:RGD Symbol;Acc:1308044]	6.23332	0.037	0.6	0.4	0
LOC501297	hypothetical LOC501297 [Source:RGD Symbol;Acc:1589596]	6.23332	0.037	0.6	0.93	0
Rlim	ring finger protein, LIM domain interacting [Source:RGD Symbol;Acc:1559832]	6.1475	5.8e-07	0.00011	2.49	0.44
Irx1	iroquois homeobox 1 [Source:RGD Symbol;Acc:1309060]	5.89708	2.2e-10	8.1e-08	5.68	0.9
Otogl	otogelin-like [Source:RGD Symbol;Acc:1589018]	5.89708	0.0062	0.2	0.17	0.03
Spsb4	splA/ryanodine receptor domain and SOCS box containing 4 [Source:RGD Symbol;Acc:1562307]	5.77572	1.1e-11	5e-09	8.6	1.39
Trim36	tripartite motif-containing 36 [Source:RGD Symbol;Acc:1308714]	5.73582	0.0021	0.094	0.57	0.09
Hk2	hexokinase 2 [Source:RGD Symbol;Acc:2797]	5.73582	0.033	0.57	0.13	0.02
NEWGENE_1582994	DCN1, defective in cullin neddylation 1, domain containing 2 [Source:RGD Symbol;Acc:9432541]	5.57897	1.5e-09	4.8e-07	4.28	0.7
Slc1a2	solute carrier family 1 member 2 [Source:RGD Symbol;Acc:3697]	5.46416	8.8e-07	0.00015	7.28	1.23
Igfbp2	insulin-like growth factor binding protein 2 [Source:RGD Symbol;Acc:2873]	5.42642	3.1e-13	2e-10	97.73	16.78
Mthfd1l	methylenetetrahydrofolate dehydrogenase (NADP+ dependent) 1-like [Source:RGD Symbol;Acc:1307311]	5.42642	0.0012	0.061	0.45	0.08
Sds	serine dehydratase [Source:RGD Symbol;Acc:67376]	5.35171	6.1e-13	3.8e-10	81.22	14.98
Ppp4r4	protein phosphatase 4, regulatory subunit 4 [Source:RGD Symbol;Acc:1560932]	4.85678	0.022	0.46	0.26	0.05
Socs1	suppressor of cytokine signaling 1 [Source:RGD Symbol;Acc:69272]	4.85678	0.022	0.46	0.93	0.18
Ccne2	cyclin E2 [Source:RGD Symbol;Acc:1307783]	4.85678	0.022	0.46	0.3	0.06
Pdzk1ip1	PDZK1 interacting protein 1 [Source:RGD Symbol;Acc:620952]	4.85678	0.022	0.46	1.57	0.3
RGD1561648	RGD1561648 [Source:RGD Symbol;Acc:1561648]	4.85678	0.022	0.46	0.46	0.1
Wee1	WEE1 G2 checkpoint kinase [Source:RGD Symbol;Acc:1307895]	4.75683	3.9e-09	1.2e-06	4.75	0.93
Cry1	cryptochrome circadian regulator 1 [Source:RGD Symbol;Acc:735083]	4.75683	4.9e-09	1.4e-06	5.25	1.03
Mmp11	matrix metallopeptidase 11 [Source:RGD Symbol;Acc:3099]	4.69134	0.01	0.29	0.53	0.11
Rasl10b	RAS-like, family 10, member B [Source:RGD Symbol;Acc:1310873]	4.65893	3.6e-08	8.8e-06	4.42	0.88
AABR07028009.1	proteasome (prosome, macropain) activator subunit 1 (PA28 alpha), pseudo 1 [Source:NCBI gene;Acc:685197]	4.59479	0.0052	0.19	2.55	0.52
Syt12	synaptotagmin 12 [Source:RGD Symbol;Acc:621876]	4.50023	0.00031	0.022	0.72	0.15
Runx1t1	RUNX1 partner transcriptional co-repressor 1 [Source:RGD Symbol;Acc:1305490]	4.50023	0.034	0.58	0.13	0.03
Tmod1	tropomodulin 1 [Source:RGD Symbol;Acc:3874]	4.46915	1.1e-06	0.00018	2.61	0.54
Abcd2	ATP binding cassette subfamily D member 2 [Source:RGD Symbol;Acc:69244]	4.46915	0.0011	0.058	0.35	0.07
Abcg5	ATP binding cassette subfamily G member 5 [Source:RGD Symbol;Acc:620298]	4.43828	6.3e-10	2.2e-07	14.15	2.96
Slc37a2	solute carrier family 37 member 2 [Source:RGD Symbol;Acc:1564160]	4.34694	0.00018	0.014	0.69	0.15
Prss32	protease, serine, 32 [Source:RGD Symbol;Acc:1311905]	4.31691	5.9e-05	0.0056	4.51	0.97
Per2	period circadian regulator 2 [Source:RGD Symbol;Acc:61945]	4.22807	2e-10	7.4e-08	23.95	5.28
LOC108348055	B9 domain-containing protein 1 [Source:RGD Symbol;Acc:11475921]	4.22807	3.9e-05	0.0041	7.24	1.63
LOC100912282	calcium-binding and coiled-coil domain-containing protein 1-like [Source:RGD Symbol;Acc:6488185]	4.22807	5.4e-05	0.0053	1.32	0.28
Dok1	docking protein 1 [Source:RGD Symbol;Acc:1309499]	4.16986	0.023	0.46	0.65	0.14
Gcnt2	glucosaminyl (N-acetyl) transferase 2 (I blood group) [Source:RGD Symbol;Acc:1303198]	4.14106	1.5e-09	5e-07	12.85	2.9
AABR07061378.1	similar to 40S ribosomal protein S25 [Source:NCBI gene;Acc:685085]	4.05584	5.2e-09	1.5e-06	126.53	28.8
Noct	nocturnin [Source:RGD Symbol;Acc:1587344]	3.97237	3.8e-08	8.9e-06	7.81	1.83
Neu2	neuraminidase 2 [Source:RGD Symbol;Acc:3164]	3.94493	7.8e-06	0.00099	4.04	0.9
Prex2	phosphatidylinositol-3,4,5-trisphosphate-dependent Rac exchange factor 2 [Source:RGD Symbol;Acc:1307865]	3.94493	0.0014	0.068	0.41	0.1
AABR07054400.1	cyclic nucleotide binding domain containing 2 [Source:NCBI gene;Acc:296311]	3.94493	0.016	0.39	0.4	0.09
Trim24	tripartite motif-containing 24 [Source:RGD Symbol;Acc:1560596]	3.91768	3.1e-07	6.1e-05	5.12	1.22
Aldoc	aldolase, fructose-bisphosphate C [Source:RGD Symbol;Acc:2091]	3.89062	0.033	0.57	0.67	0.16
Fam76a	family with sequence similarity 76, member A [Source:RGD Symbol;Acc:1305162]	3.86375	0.0058	0.2	1.82	0.44
Cbr1	carbonyl reductase 1 [Source:RGD Symbol;Acc:2286]	3.78423	0.00091	0.05	2.25	0.55
RGD1564053	RIKEN cDNA A830018L16 gene [Source:MGI Symbol;Acc:MGI:2444149]	3.75809	0.022	0.46	0.3	0.08
AABR07031193.1	laminin subunit alpha 3 [Source:NCBI gene;Acc:307582]	3.65533	6.4e-07	0.00011	5.51	1.4
Sult2a1	sulfotransferase family 2A member 1 [Source:RGD Symbol;Acc:621337]	3.63008	5.5e-09	1.5e-06	2395.51	613.73
Nat8b	N-acetyltransferase 8B [Source:RGD Symbol;Acc:621605]	3.63008	4.5e-05	0.0046	7.13	1.8
Mindy4	MINDY lysine 48 deubiquitinase 4 [Source:RGD Symbol;Acc:1562590]	3.5801	0.00038	0.026	1.29	0.34
Cetn3	centrin 3 [Source:RGD Symbol;Acc:620249]	3.55537	7.4e-06	0.00095	11.06	2.92
Mt1	metallothionein 1 [Source:RGD Symbol;Acc:3117]	3.50642	3.8e-08	8.9e-06	396.15	103.79
Rgma	repulsive guidance molecule BMP co-receptor a [Source:RGD Symbol;Acc:1311983]	3.45815	0.0045	0.17	0.62	0.16
AC109891.1	\N	3.43426	1.4e-07	2.9e-05	8.35	2.27
Qpct	glutaminyl-peptide cyclotransferase [Source:RGD Symbol;Acc:1562284]	3.38698	0.011	0.3	1.21	0.33
Rnf186	ring finger protein 186 [Source:RGD Symbol;Acc:1596075]	3.38698	0.011	0.3	1.58	0.43
Derl3	derlin 3 [Source:RGD Symbol;Acc:1597373]	3.34035	0.046	0.68	2.03	0.58
LOC103694875	derlin-3 [Source:RGD Symbol;Acc:9125074]	3.34035	0.046	0.68	2.03	0.58
Sik1	salt-inducible kinase 1 [Source:RGD Symbol;Acc:69407]	3.31728	3.2e-07	6.3e-05	7.03	1.97
LOC108349189	high mobility group protein B1 pseudogene [Source:RGD Symbol;Acc:11468204]	3.29436	6e-05	0.0056	13.78	3.93
Erich5	glutamate-rich 5 [Source:RGD Symbol;Acc:1590540]	3.29436	0.031	0.56	1.32	0.37
AC099450.1	\N	3.29436	0.031	0.56	0.94	0.26
Gda	guanine deaminase [Source:RGD Symbol;Acc:621617]	3.24901	0.00011	0.0091	3.51	1.01
Rad18	RAD18 E3 ubiquitin protein ligase [Source:RGD Symbol;Acc:1306993]	3.24901	0.015	0.38	0.68	0.19
Etnppl	ethanolamine-phosphate phospho-lyase [Source:RGD Symbol;Acc:1590098]	3.20428	1.4e-07	3e-05	47.6	13.84
LOC103693999	transmembrane and coiled-coil domain-containing protein 3 [Source:RGD Symbol;Acc:9333008]	3.18215	3.8e-05	0.0041	3.82	1.34
A2m	alpha-2-macroglobulin [Source:RGD Symbol;Acc:2004]	3.16017	1.3e-06	0.00021	6.38	1.88
Slc30a3	solute carrier family 30 member 3 [Source:RGD Symbol;Acc:1359689]	3.13834	5.1e-06	0.00068	8.59	2.54
LOC100910057	sulfotransferase 1C2-like [Source:RGD Symbol;Acc:6500449]	3.11666	2.1e-06	0.00031	21.11	6.24
Ceacam4	CEA cell adhesion molecule 4 [Source:RGD Symbol;Acc:708435]	3.11666	0.029	0.54	2.55	0.74
Svop	SV2 related protein [Source:RGD Symbol;Acc:620277]	3.11666	0.043	0.66	0.52	0.17
Fut1	fucosyltransferase 1 [Source:RGD Symbol;Acc:2638]	3.11666	0.043	0.66	0.44	0.13
Cd86	CD86 molecule [Source:RGD Symbol;Acc:628714]	3.11666	0.043	0.66	0.71	0.23
Ldb3	LIM domain binding 3 [Source:RGD Symbol;Acc:1564875]	3.11666	0.043	0.66	0.24	0.07
Cytip	cytohesin 1 interacting protein [Source:RGD Symbol;Acc:1307990]	3.07375	0.00044	0.029	2.87	0.87
Por	cytochrome p450 oxidoreductase [Source:RGD Symbol;Acc:68335]	3.03143	4.7e-07	8.7e-05	273.1	84.18
Hic1	HIC ZBTB transcriptional repressor 1 [Source:RGD Symbol;Acc:1307527]	3.01049	0.011	0.3	0.8	0.24
Mt2A	metallothionein 2A [Source:RGD Symbol;Acc:1592345]	2.96905	1.5e-06	0.00024	436.71	135.53
Sybu	syntabulin [Source:RGD Symbol;Acc:1564335]	2.94854	1.9e-05	0.0021	4.82	1.52
Kif26b	kinesin family member 26B [Source:RGD Symbol;Acc:1560022]	2.94854	0.003	0.12	0.41	0.13
Dusp10	dual specificity phosphatase 10 [Source:RGD Symbol;Acc:1310844]	2.94854	0.0079	0.24	0.83	0.26
Usp2	ubiquitin specific peptidase 2 [Source:RGD Symbol;Acc:621073]	2.92817	3.6e-06	0.0005	32.71	9.98
Plaat1	phospholipase A and acyltransferase 1 [Source:RGD Symbol;Acc:1309485]	2.90795	0.00016	0.013	2.59	0.83
Pcgf5	polycomb group ring finger 5 [Source:RGD Symbol;Acc:1583513]	2.90795	0.0002	0.015	5.12	1.62
Otud3	OTU deubiquitinase 3 [Source:RGD Symbol;Acc:1560468]	2.90795	0.019	0.43	1.32	0.42
Gjc3	gap junction protein, gamma 3 [Source:RGD Symbol;Acc:727930]	2.90795	0.019	0.43	3.07	0.98
Nampt	nicotinamide phosphoribosyltransferase [Source:RGD Symbol;Acc:631365]	2.88786	1.7e-06	0.00026	76	24.69
Tlk1	tousled-like kinase 1 [Source:RGD Symbol;Acc:1310370]	2.86791	0.037	0.6	0.49	0.15
Ciart	circadian associated repressor of transcription [Source:RGD Symbol;Acc:1566380]	2.8481	4.5e-05	0.0046	9.63	3.15
LOC100361492	cytochrome P450, family 2, subfamily c, polypeptide 55-like [Source:RGD Symbol;Acc:2320073]	2.80889	2.5e-05	0.0028	13.89	4.6
Per3	period circadian regulator 3 [Source:RGD Symbol;Acc:621581]	2.78949	4.5e-06	0.0006	22.52	7.25
Sorbs3	sorbin and SH3 domain containing 3 [Source:RGD Symbol;Acc:628900]	2.78949	7.3e-06	0.00094	19.04	6.37
Dnase2b	deoxyribonuclease 2 beta [Source:RGD Symbol;Acc:70901]	2.75108	1.1e-05	0.0014	25.6	8.68
Lmo7	LIM domain 7 [Source:RGD Symbol;Acc:1302984]	2.75108	4.8e-05	0.0049	3.78	1.28
LOC108348145	zinc finger protein 7-like [Source:RGD Symbol;Acc:11394947]	2.73208	0.0011	0.057	1.48	0.92
Lonrf3	LON peptidase N-terminal domain and ring finger 3 [Source:RGD Symbol;Acc:1565451]	2.71321	0.0057	0.2	1.1	0.39
Epop	elongin BC and polycomb repressive complex 2 associated protein [Source:RGD Symbol;Acc:1587434]	2.71321	0.0057	0.2	2.2	0.76
Slc25a40	solute carrier family 25, member 40 [Source:RGD Symbol;Acc:1308774]	2.71321	0.032	0.57	1.3	0.47
LOC100910526	sulfotransferase 1C2-like [Source:RGD Symbol;Acc:6497849]	2.69447	2.7e-05	0.003	9.73	3.37
Map2k6	mitogen-activated protein kinase kinase 6 [Source:RGD Symbol;Acc:620666]	2.69447	0.00041	0.028	3.65	1.26
Cyp3a9	cytochrome P450, family 3, subfamily a, polypeptide 9 [Source:RGD Symbol;Acc:708392]	2.67586	0.012	0.33	1.7	0.59
Klrg1	killer cell lectin like receptor G1 [Source:RGD Symbol;Acc:61978]	2.67586	0.012	0.33	1.87	0.65
Nxpe5	neurexophilin and PC-esterase domain family, member 5 [Source:RGD Symbol;Acc:1588255]	2.65737	0.046	0.68	1	0.35
Epb41	erythrocyte membrane protein band 4.1 [Source:RGD Symbol;Acc:1564762]	2.63902	7.4e-05	0.0067	8.3	3.01
Paqr4	progestin and adipoQ receptor family member 4 [Source:RGD Symbol;Acc:1309533]	2.63902	0.0089	0.27	0.68	0.24
Tnfrsf21	TNF receptor superfamily member 21 [Source:RGD Symbol;Acc:1307308]	2.62079	0.00048	0.031	1.89	0.67
Zfp516	zinc finger protein 516 [Source:RGD Symbol;Acc:1306817]	2.60268	0.042	0.66	0.41	0.14
Slc13a2	solute carrier family 13 member 2 [Source:RGD Symbol;Acc:61920]	2.58471	0.00085	0.048	2.82	1.01
Fam50a	family with sequence similarity 50, member A [Source:RGD Symbol;Acc:1560964]	2.56685	9.3e-05	0.008	16.85	6.12
AABR07011057.2	\N	2.56685	0.0012	0.061	2.91	1.05
Zfp275	zinc finger protein 275 [Source:RGD Symbol;Acc:1564630]	2.56685	0.0025	0.11	0.7	0.26
Vmac	vimentin-type intermediate filament associated coiled-coil protein [Source:RGD Symbol;Acc:1303340]	2.54912	0.039	0.62	5.57	2.02
Adamts1	ADAM metallopeptidase with thrombospondin type 1 motif, 1 [Source:RGD Symbol;Acc:621241]	2.53151	0.00025	0.019	2.8	1.03
Fam160b1	family with sequence similarity 160, member B1 [Source:RGD Symbol;Acc:1306116]	2.53151	0.0011	0.058	2.81	1.04
Ino80b	INO80 complex subunit B [Source:RGD Symbol;Acc:1562258]	2.51403	0.0005	0.032	10.52	3.92
Slc7a5	solute carrier family 7 member 5 [Source:RGD Symbol;Acc:620639]	2.51403	0.014	0.35	0.77	0.29
Ngef	neuronal guanine nucleotide exchange factor [Source:RGD Symbol;Acc:1309055]	2.49666	4.8e-05	0.0049	26.09	9.77
Exph5	exophilin 5 [Source:RGD Symbol;Acc:1560308]	2.47942	0.001	0.055	0.82	0.31
Rusc2	RUN and SH3 domain containing 2 [Source:RGD Symbol;Acc:1592688]	2.44528	7.3e-05	0.0066	12.58	4.78
Atp11c	ATPase phospholipid transporting 11C [Source:RGD Symbol;Acc:1564481]	2.44528	0.00051	0.032	3.22	1.23
Srpx	sushi-repeat-containing protein, X-linked [Source:RGD Symbol;Acc:70950]	2.44528	0.0064	0.21	2.05	0.78
Prodh1	proline dehydrogenase 1 [Source:RGD Symbol;Acc:1590932]	2.42839	5.3e-05	0.0052	90.95	34.93
LOC103689961	selenoprotein W-like [Source:RGD Symbol;Acc:9418506]	2.42839	0.0012	0.062	24.77	9.98
Sfxn2	sideroflexin 2 [Source:RGD Symbol;Acc:1306131]	2.41162	0.022	0.46	1.22	0.49
LOC100360791	tumor protein, translationally-controlled 1 [Source:RGD Symbol;Acc:2321467]	2.41162	0.022	0.46	7.55	2.9
Pcdh18	protocadherin 18 [Source:RGD Symbol;Acc:1305870]	2.39496	0.00058	0.035	2.26	0.88
Cyp1a2	cytochrome P450, family 1, subfamily a, polypeptide 2 [Source:RGD Symbol;Acc:2459]	2.37841	6.8e-05	0.0063	324.27	126.99
Homer2	homer scaffold protein 2 [Source:RGD Symbol;Acc:620705]	2.37841	0.0019	0.085	3.8	1.49
Ccdc127	coiled-coil domain containing 127 [Source:RGD Symbol;Acc:735106]	2.37841	0.031	0.56	1.89	0.74
Rin2	Ras and Rab interactor 2 [Source:RGD Symbol;Acc:1305873]	2.36199	0.00047	0.031	3.7	1.46
Prickle1	prickle planar cell polarity protein 1 [Source:RGD Symbol;Acc:735090]	2.36199	0.0021	0.094	1.53	0.6
Mtmr11	myotubularin related protein 11 [Source:RGD Symbol;Acc:1589965]	2.36199	0.0032	0.13	2.1	0.83
Gon7	GON7 subunit of KEOPS complex [Source:RGD Symbol;Acc:2302582]	2.34567	0.00035	0.024	16.11	9.98
Inmt	indolethylamine N-methyltransferase [Source:RGD Symbol;Acc:1597087]	2.34567	0.00067	0.04	13.81	5.47
Krt10	keratin 10 [Source:RGD Symbol;Acc:1359092]	2.34567	0.0013	0.064	5.05	2.01
Zbtb38	zinc finger and BTB domain containing 38 [Source:RGD Symbol;Acc:1310136]	2.34567	0.0069	0.22	1.02	0.4
Trmt11	tRNA methyltransferase 11 homolog [Source:RGD Symbol;Acc:727798]	2.32947	0.002	0.092	5.58	2.29
Pde6c	phosphodiesterase 6C [Source:RGD Symbol;Acc:1309844]	2.32947	0.017	0.41	1.21	0.48
Igf2bp3	insulin-like growth factor 2 mRNA binding protein 3 [Source:RGD Symbol;Acc:1306512]	2.32947	0.043	0.66	0.97	0.39
Prrt1	proline-rich transmembrane protein 1 [Source:RGD Symbol;Acc:1359348]	2.32947	0.043	0.66	1.2	0.52
Dpf3	double PHD fingers 3 [Source:RGD Symbol;Acc:1309052]	2.32947	0.043	0.66	1.73	0.7
Atp6ap1l	ATPase H+ transporting accessory protein 1 like [Source:RGD Symbol;Acc:1564936]	2.31338	0.0083	0.25	4.01	1.61
Zyg11b	zyg-11 family member B, cell cycle regulator [Source:RGD Symbol;Acc:1307814]	2.31338	0.011	0.31	1.27	0.51
Lcp2	lymphocyte cytosolic protein 2 [Source:RGD Symbol;Acc:619743]	2.31338	0.011	0.31	0.98	0.4
Rgs16	regulator of G-protein signaling 16 [Source:RGD Symbol;Acc:1589741]	2.2974	0.00015	0.012	72.75	29.58
Depp1	DEPP1, autophagy regulator [Source:RGD Symbol;Acc:1565700]	2.2974	0.0002	0.015	57.39	23.23
Slc26a8	solute carrier family 26 member 8 [Source:RGD Symbol;Acc:1308898]	2.2974	0.00023	0.017	15.78	6.37
Nceh1	neutral cholesterol ester hydrolase 1 [Source:RGD Symbol;Acc:1311104]	2.2974	0.00037	0.025	7.21	2.41
Pdxp	pyridoxal phosphatase [Source:RGD Symbol;Acc:1586212]	2.2974	0.0042	0.16	2.9	1.17
Maff	MAF bZIP transcription factor F [Source:RGD Symbol;Acc:1309531]	2.2974	0.0061	0.2	2.59	1.05
Slc7a7	solute carrier family 7 member 7 [Source:RGD Symbol;Acc:619902]	2.2974	0.023	0.47	1.64	0.67
AABR07034750.1	\N	2.2974	0.04	0.63	0.36	0.15
Cyp7a1	cytochrome P450 family 7 subfamily A member 1 [Source:RGD Symbol;Acc:2482]	2.28153	0.00017	0.013	51.49	21.06
Per1	period circadian regulator 1 [Source:RGD Symbol;Acc:727863]	2.28153	0.00022	0.016	17.51	7.15
Mcrip2	MAPK regulated co-repressor interacting protein 2 [Source:RGD Symbol;Acc:1592603]	2.28153	0.00052	0.033	36.92	15.07
MGC94199	similar to RIKEN cDNA 2610301B20; EST AI428449 [Source:RGD Symbol;Acc:1549749]	2.28153	0.01	0.29	2.01	0.83
LOC100911422	nuclear migration protein nudC-like [Source:RGD Symbol;Acc:6493297]	2.28153	0.021	0.44	2.76	1.13
Chtopl1	chromatin target of PRMT1-like 1 [Source:RGD Symbol;Acc:1584868]	2.28153	0.034	0.58	3.69	1.54
Glyatl2	glycine-N-acyltransferase-like 2 [Source:RGD Symbol;Acc:621231]	2.26577	0.00021	0.016	78.26	32.28
LOC103694903	serine/threonine-protein phosphatase 2A catalytic subunit alpha isoform [Source:RGD Symbol;Acc:9257421]	2.26577	0.0004	0.026	44.1	18.09
Esr1	estrogen receptor 1 [Source:RGD Symbol;Acc:2581]	2.26577	0.00045	0.029	5.41	2.24
Rps18l1	ribosomal protein S18-like 1 [Source:RGD Symbol;Acc:2321678]	2.26577	0.014	0.35	9.48	3.83
Hmg1l1	high-mobility group (nonhistone chromosomal) protein 1-like 1 [Source:RGD Symbol;Acc:1587112]	2.26577	0.032	0.57	2.15	0.91
Rhbdd2	rhomboid domain containing 2 [Source:RGD Symbol;Acc:1308231]	2.25012	0.00063	0.038	19.04	7.87
Tlr6	toll-like receptor 6 [Source:RGD Symbol;Acc:1303030]	2.25012	0.03	0.55	0.92	0.4
Smad6	SMAD family member 6 [Source:RGD Symbol;Acc:1305069]	2.23457	0.025	0.49	2.39	1
Zfp354a	zinc finger protein 354A [Source:RGD Symbol;Acc:2967]	2.21914	0.00027	0.02	90.35	36.49
Bcl6	BCL6, transcription repressor [Source:RGD Symbol;Acc:1309345]	2.21914	0.00066	0.039	7.87	3.31
LOC102556148	probable N-acetyltransferase CML2-like [Source:RGD Symbol;Acc:7567030]	2.21914	0.017	0.41	6.19	2.66
Nat8f4	N-acetyltransferase 8 (GCN5-related) family member 4 [Source:RGD Symbol;Acc:7636572]	2.21914	0.017	0.41	6.19	2.66
LOC100911356	peroxisomal biogenesis factor 19-like [Source:RGD Symbol;Acc:6493558]	2.21914	0.042	0.66	3.06	1.24
Pcdha13	protocadherin alpha 13 [Source:RGD Symbol;Acc:620751]	2.21914	0.042	0.66	0.4	0.17
Acsf2	acyl-CoA synthetase family member 2 [Source:RGD Symbol;Acc:1562656]	2.20381	0.0009	0.05	7.2	3.05
Ralgps1	Ral GEF with PH domain and SH3 binding motif 1 [Source:RGD Symbol;Acc:2319500]	2.20381	0.0045	0.17	1.06	0.45
Tom1l1	target of myb1 like 1 membrane trafficking protein [Source:RGD Symbol;Acc:1562626]	2.18859	0.00079	0.046	11.96	5.09
Hmgb3	high mobility group box 3 [Source:RGD Symbol;Acc:1564407]	2.18859	0.0031	0.12	6.81	2.89
Riox2	ribosomal oxygenase 2 [Source:RGD Symbol;Acc:708521]	2.18859	0.034	0.58	2.08	0.88
Prelid2	PRELI domain containing 2 [Source:RGD Symbol;Acc:1584707]	2.17347	0.00062	0.038	8.6	3.68
Fnip2	folliculin interacting protein 2 [Source:RGD Symbol;Acc:1562174]	2.17347	0.0012	0.06	4.57	1.96
Tgm1	transglutaminase 1 [Source:RGD Symbol;Acc:61838]	2.17347	0.03	0.55	0.85	0.36
Arnt	aryl hydrocarbon receptor nuclear translocator [Source:RGD Symbol;Acc:2153]	2.15846	0.0026	0.11	4.63	2.01
Znf750	zinc finger protein 750 [Source:RGD Symbol;Acc:1590044]	2.15846	0.0054	0.19	3.51	1.51
Cfd	complement factor D [Source:RGD Symbol;Acc:2498]	2.15846	0.016	0.39	5.71	2.46
Srd5a1	steroid 5 alpha-reductase 1 [Source:RGD Symbol;Acc:3757]	2.14355	0.00049	0.031	67.54	29.38
Cyp2c7	cytochrome P450, family 2, subfamily c, polypeptide 7 [Source:RGD Symbol;Acc:620379]	2.11404	0.00057	0.035	903.95	399.55
Anapc15	anaphase promoting complex subunit 15 [Source:RGD Symbol;Acc:1311634]	2.11404	0.018	0.43	19.35	8.41
Fmo1	flavin containing dimethylaniline monoxygenase 1 [Source:RGD Symbol;Acc:2622]	2.09943	0.00091	0.05	32.62	14.68
Hspb1	heat shock protein family B (small) member 1 [Source:RGD Symbol;Acc:61306]	2.09943	0.001	0.054	60.28	26.63
Cry2	cryptochrome circadian regulator 2 [Source:RGD Symbol;Acc:620935]	2.09943	0.001	0.054	11.91	5.29
Nqo1	NAD(P)H quinone dehydrogenase 1 [Source:RGD Symbol;Acc:2503]	2.09943	0.0014	0.069	19.3	8.56
Pla1a	phospholipase A1 member A [Source:RGD Symbol;Acc:621261]	2.09943	0.0014	0.071	17.15	7.6
Pcdhgc3	protocadherin gamma subfamily C, 3 [Source:RGD Symbol;Acc:620746]	2.09943	0.0073	0.23	2.57	1.14
Dock4	dedicator of cytokinesis 4 [Source:RGD Symbol;Acc:1561724]	2.09943	0.0082	0.25	1.06	0.47
Ces2e	carboxylesterase 2E [Source:RGD Symbol;Acc:621563]	2.08493	0.0008	0.046	72.04	32.26
Lzts1	leucine zipper tumor suppressor 1 [Source:RGD Symbol;Acc:708565]	2.08493	0.043	0.66	0.53	0.24
Ccne1	cyclin E1 [Source:RGD Symbol;Acc:2294]	2.08493	0.047	0.68	1.41	0.63
Gpd1l	glycerol-3-phosphate dehydrogenase 1-like [Source:RGD Symbol;Acc:1560123]	2.05623	0.0017	0.08	8.11	3.67
Tuba3a	tubulin, alpha 3A [Source:RGD Symbol;Acc:1565719]	2.05623	0.01	0.29	4.31	1.95
Cyp2c24	cytochrome P450, family 2, subfamily c, polypeptide 24 [Source:RGD Symbol;Acc:1563697]	2.05623	0.012	0.32	2.94	1.33
NEWGENE_620180	solute carrier family 40 member 1 [Source:RGD Symbol;Acc:11441106]	2.04202	0.0011	0.057	55.5	25.38
Ablim3	actin binding LIM protein family, member 3 [Source:RGD Symbol;Acc:1565118]	2.04202	0.0043	0.16	5.76	2.61
Fcna	ficolin A [Source:RGD Symbol;Acc:621221]	2.04202	0.0057	0.2	7.96	3.63
AABR07011951.1	\N	2.02792	0.0026	0.11	12.47	5.74
Ces2i	carboxylesterase 2I [Source:RGD Symbol;Acc:1565045]	2.02792	0.021	0.45	2.85	1.31
Rorc	RAR-related orphan receptor C [Source:RGD Symbol;Acc:1595785]	2.01391	0.0015	0.072	35.91	16.62
Cobll1	cordon-bleu WH2 repeat protein-like 1 [Source:RGD Symbol;Acc:1308954]	2.01391	0.0019	0.085	8.9	4.11
Cyp2b1	cytochrome P450, family 2, subfamily b, polypeptide 1 [Source:RGD Symbol;Acc:2466]	2.01391	0.0062	0.2	6.27	3.13
Ago4	argonaute RISC component 4 [Source:RGD Symbol;Acc:1304583]	2.01391	0.022	0.46	1.14	0.53
RGD1559459	similar to Expressed sequence AI788959 [Source:RGD Symbol;Acc:1559459]	1.98618	0.0059	0.2	8.58	4
Ect2l	epithelial cell transforming 2 like [Source:RGD Symbol;Acc:9246970]	1.98618	0.025	0.5	1.71	0.8
Mettl7a	methyltransferase like 7A [Source:RGD Symbol;Acc:1308407]	1.97247	0.0021	0.094	66.61	31.56
Susd2	sushi domain containing 2 [Source:RGD Symbol;Acc:1308595]	1.97247	0.0064	0.21	4.27	2.79
Ctdsp2	CTD small phosphatase 2 [Source:RGD Symbol;Acc:2319209]	1.97247	0.022	0.46	8.75	4.11
Il33	interleukin 33 [Source:RGD Symbol;Acc:1311155]	1.95884	0.0023	0.099	35.21	16.74
Dbp	D-box binding PAR bZIP transcription factor [Source:RGD Symbol;Acc:2491]	1.94531	0.0021	0.094	170.7	80.81
Plaat3	phospholipase A and acyltransferase 3 [Source:RGD Symbol;Acc:2829]	1.94531	0.0034	0.13	73.39	37.57
Znf48	zinc finger protein 48 [Source:RGD Symbol;Acc:9115869]	1.94531	0.045	0.68	1.41	0.67
Cyp2e1	cytochrome P450, family 2, subfamily e, polypeptide 1 [Source:RGD Symbol;Acc:2475]	1.93187	0.0022	0.095	2367.04	1139.23
LOC108348082	dual specificity mitogen-activated protein kinase kinase 3-like [Source:RGD Symbol;Acc:11389050]	1.93187	0.003	0.12	27.18	13.09
Ifrd2	interferon-related developmental regulator 2 [Source:RGD Symbol;Acc:1310222]	1.93187	0.0039	0.15	20.24	9.78
Bhlha15	basic helix-loop-helix family, member a15 [Source:RGD Symbol;Acc:3091]	1.93187	0.0083	0.25	3.69	1.79
Zfp503	zinc finger protein 503 [Source:RGD Symbol;Acc:1312018]	1.93187	0.043	0.66	1.06	0.51
Rhobtb1	Rho-related BTB domain containing 1 [Source:RGD Symbol;Acc:1306871]	1.91853	0.0031	0.12	23.9	11.66
AABR07031521.1	\N	1.91853	0.0094	0.28	6.49	3.17
Ptpdc1	protein tyrosine phosphatase domain containing 1 [Source:RGD Symbol;Acc:1307698]	1.91853	0.037	0.6	1.31	0.67
Abcg2	ATP binding cassette subfamily G member 2 [Source:RGD Symbol;Acc:631345]	1.89212	0.018	0.43	3.4	1.72
Cyp17a1	cytochrome P450, family 17, subfamily a, polypeptide 1 [Source:RGD Symbol;Acc:2456]	1.87905	0.0051	0.18	23.1	11.42
Tmem218	transmembrane protein 218 [Source:RGD Symbol;Acc:1311364]	1.87905	0.0069	0.22	22.08	10.95
Chmp4c	charged multivesicular body protein 4C [Source:RGD Symbol;Acc:1564543]	1.87905	0.011	0.3	9.26	4.58
LOC299312	similar to G protein-binding protein CRFG [Source:RGD Symbol;Acc:1594558]	1.87905	0.024	0.47	3.5	1.72
Dnaja4	DnaJ heat shock protein family (Hsp40) member A4 [Source:RGD Symbol;Acc:1310035]	1.87905	0.026	0.51	3.42	1.7
Peg3	paternally expressed 3 [Source:RGD Symbol;Acc:2323590]	1.86607	0.0049	0.18	8.26	4.13
Stk35	serine/threonine kinase 35 [Source:RGD Symbol;Acc:1310247]	1.86607	0.025	0.5	1.86	0.93
Coa8	cytochrome c oxidase assembly factor 8 [Source:RGD Symbol;Acc:1304719]	1.86607	0.04	0.64	11.5	5.73
LOC100911766	tetraspanin-4-like [Source:RGD Symbol;Acc:6490894]	1.85318	0.0048	0.17	86.47	43.4
Ces2a	carboxylesterase 2A [Source:RGD Symbol;Acc:708353]	1.85318	0.0062	0.2	43.74	21.99
Ppm1k	protein phosphatase, Mg2+/Mn2+ dependent, 1K [Source:RGD Symbol;Acc:1308501]	1.85318	0.017	0.41	4.77	2.15
Rrp12	ribosomal RNA processing 12 homolog [Source:RGD Symbol;Acc:1591867]	1.85318	0.022	0.46	1.81	0.91
Rab32	RAB32, member RAS oncogene family [Source:RGD Symbol;Acc:1559997]	1.85318	0.039	0.62	1.48	0.74
Pisd	phosphatidylserine decarboxylase [Source:RGD Symbol;Acc:1596729]	1.85318	0.041	0.64	4.34	2.19
Ppif	peptidylprolyl isomerase F [Source:RGD Symbol;Acc:628670]	1.84038	0.0058	0.2	47.85	24.15
Lpar6	lysophosphatidic acid receptor 6 [Source:RGD Symbol;Acc:1595950]	1.84038	0.0067	0.22	25.45	12.89
Cdc14a	cell division cycle 14A [Source:RGD Symbol;Acc:1304649]	1.84038	0.046	0.68	0.96	0.49
Snx25	sorting nexin 25 [Source:RGD Symbol;Acc:1310150]	1.82766	0.0084	0.25	12.1	6.18
Bach1	BTB domain and CNC homolog 1 [Source:RGD Symbol;Acc:1306693]	1.82766	0.03	0.55	2.03	1.04
Aox3	aldehyde oxidase 3 [Source:RGD Symbol;Acc:1359328]	1.81504	0.0079	0.24	16.92	7.07
Arhgef26	Rho guanine nucleotide exchange factor 26 [Source:RGD Symbol;Acc:1562559]	1.81504	0.0079	0.24	11.74	6.05
Irs2	insulin receptor substrate 2 [Source:RGD Symbol;Acc:69316]	1.81504	0.0099	0.29	4.27	2.2
Tctn1	tectonic family member 1 [Source:RGD Symbol;Acc:1566266]	1.81504	0.013	0.33	4.3	2.21
Hlf	HLF transcription factor, PAR bZIP family member [Source:RGD Symbol;Acc:1582828]	1.81504	0.034	0.58	8.59	4.41
Cacna1h	calcium voltage-gated channel subunit alpha1 H [Source:RGD Symbol;Acc:68943]	1.81504	0.045	0.68	0.6	0.31
Polg2	DNA polymerase gamma 2, accessory subunit [Source:RGD Symbol;Acc:1305128]	1.8025	0.0095	0.28	18.72	9.65
AABR07006310.1	macrophage expressed 1 [Source:NCBI gene;Acc:64552]	1.8025	0.01	0.29	13.58	7.02
Id1	inhibitor of DNA binding 1, HLH protein [Source:RGD Symbol;Acc:2858]	1.8025	0.017	0.41	16.37	8.42
Mtr	5-methyltetrahydrofolate-homocysteine methyltransferase [Source:RGD Symbol;Acc:621283]	1.8025	0.018	0.43	2.73	1.42
Zfp217	zinc finger protein 217 [Source:RGD Symbol;Acc:1308451]	1.8025	0.032	0.57	2.1	1.09
Slc9a3r1	SLC9A3 regulator 1 [Source:RGD Symbol;Acc:708538]	1.79005	0.0071	0.23	127.87	66.3
Disp1	dispatched RND transporter family member 1 [Source:RGD Symbol;Acc:1307675]	1.79005	0.021	0.45	2.12	1.1
Syde2	synapse defective Rho GTPase homolog 2 [Source:RGD Symbol;Acc:1564206]	1.79005	0.033	0.57	2.07	1.08
Helq	helicase, POLQ-like [Source:RGD Symbol;Acc:1560216]	1.79005	0.038	0.61	1.47	0.76
Rpl10l	ribosomal protein L10-like [Source:RGD Symbol;Acc:1305913]	1.79005	0.043	0.66	11.43	5.93
Pnpla7	patatin-like phospholipase domain containing 7 [Source:RGD Symbol;Acc:708466]	1.77769	0.0078	0.24	93.07	48.85
AABR07031491.2	\N	1.77769	0.01	0.29	23.26	12.19
Cped1	cadherin-like and PC-esterase domain containing 1 [Source:RGD Symbol;Acc:1563491]	1.77769	0.014	0.36	4.38	2.3
Itga9	integrin subunit alpha 9 [Source:RGD Symbol;Acc:1311191]	1.77769	0.044	0.67	1.73	0.91
Hpd	4-hydroxyphenylpyruvate dioxygenase [Source:RGD Symbol;Acc:61974]	1.76541	0.0085	0.26	1558.77	824.32
Zfp395	zinc finger protein 395 [Source:RGD Symbol;Acc:1307849]	1.76541	0.014	0.35	6.12	3.23
Tcp11l2	t-complex 11 like 2 [Source:RGD Symbol;Acc:1307494]	1.76541	0.014	0.35	12.42	6.55
Itpr1	inositol 1,4,5-trisphosphate receptor, type 1 [Source:RGD Symbol;Acc:2933]	1.76541	0.015	0.37	2.2	1.16
Slc25a33	solute carrier family 25 member 33 [Source:RGD Symbol;Acc:1583942]	1.76541	0.018	0.43	13.32	7.04
Tmem30b	transmembrane protein 30B [Source:RGD Symbol;Acc:1308732]	1.76541	0.023	0.46	4.23	2.24
Cbx1	chromobox 1 [Source:RGD Symbol;Acc:1310714]	1.76541	0.041	0.64	18.06	9.48
Adh6	alcohol dehydrogenase 6 (class V) [Source:RGD Symbol;Acc:1306313]	1.75321	0.0089	0.27	2216.97	1190.28
Apof	apolipoprotein F [Source:RGD Symbol;Acc:1560713]	1.75321	0.0095	0.28	397.83	211.51
Inf2	inverted formin, FH2 and WH2 domain containing [Source:NCBI gene;Acc:362790]	1.75321	0.017	0.41	5.68	3.03
Tmem131	transmembrane protein 131 [Source:RGD Symbol;Acc:1309266]	1.75321	0.02	0.44	3	1.6
Atg13	autophagy related 13 [Source:RGD Symbol;Acc:1310685]	1.75321	0.022	0.46	10.78	5.74
Flvcr2	feline leukemia virus subgroup C cellular receptor family, member 2 [Source:RGD Symbol;Acc:735098]	1.75321	0.03	0.55	2.67	1.39
Ddo	D-aspartate oxidase [Source:RGD Symbol;Acc:1595123]	1.75321	0.041	0.64	6	3.18
Tef	TEF transcription factor, PAR bZIP family member [Source:RGD Symbol;Acc:3841]	1.7411	0.012	0.31	25.18	13.51
Zfp385b	zinc finger protein 385B [Source:RGD Symbol;Acc:1311181]	1.7411	0.02	0.44	5	2.62
Faap20	FA core complex associated protein 20 [Source:RGD Symbol;Acc:1308923]	1.7411	0.047	0.68	5.65	3.02
Zfp36l1	zinc finger protein 36, C3H type-like 1 [Source:RGD Symbol;Acc:62009]	1.72907	0.012	0.32	77.64	41.95
Got1	glutamic-oxaloacetic transaminase 1 [Source:RGD Symbol;Acc:2721]	1.72907	0.012	0.32	131.96	71.35
Ndel1	nudE neurodevelopment protein 1-like 1 [Source:RGD Symbol;Acc:621235]	1.72907	0.014	0.36	25.52	13.68
Usp39	ubiquitin specific peptidase 39 [Source:RGD Symbol;Acc:1308103]	1.72907	0.017	0.41	10.35	5.56
Setd1b	SET domain containing 1B, histone lysine methyltransferase [Source:RGD Symbol;Acc:2323325]	1.72907	0.024	0.47	2.34	1.26
Tifa	TRAF-interacting protein with forkhead-associated domain [Source:RGD Symbol;Acc:1359151]	1.72907	0.026	0.5	8.92	4.82
Zrsr1	zinc finger (CCCH type), RNA binding motif and serine/arginine rich 1 [Source:RGD Symbol;Acc:1561824]	1.72907	0.031	0.56	6.5	3.51
Adh5	alcohol dehydrogenase 5 (class III), chi polypeptide [Source:RGD Symbol;Acc:2292706]	1.71713	0.012	0.33	138.59	84.91
Gclm	glutamate cysteine ligase, modifier subunit [Source:RGD Symbol;Acc:619871]	1.71713	0.013	0.35	66.89	36.17
Cttn	cortactin [Source:RGD Symbol;Acc:619839]	1.71713	0.018	0.42	12.24	7.74
H1f2	H1.2 linker histone, cluster member [Source:RGD Symbol;Acc:1587893]	1.71713	0.029	0.54	28.41	15.31
Malt1	MALT1 paracaspase [Source:RGD Symbol;Acc:1309195]	1.71713	0.032	0.57	2.2	1.2
LOC108348069	HEAT repeat-containing protein 1 [Source:RGD Symbol;Acc:11474378]	1.71713	0.033	0.57	1.59	0.86
Slc16a10	solute carrier family 16 member 10 [Source:RGD Symbol;Acc:69197]	1.71713	0.034	0.58	3.97	2.15
Cnnm2	cyclin and CBS domain divalent metal cation transport mediator 2 [Source:RGD Symbol;Acc:1308162]	1.71713	0.034	0.58	2.94	1.59
As3mt	arsenite methyltransferase [Source:RGD Symbol;Acc:621325]	1.70527	0.013	0.35	207.87	113.43
Phyh	phytanoyl-CoA 2-hydroxylase [Source:RGD Symbol;Acc:620317]	1.70527	0.014	0.35	613.79	336.25
Pink1	PTEN induced kinase 1 [Source:RGD Symbol;Acc:1305769]	1.70527	0.014	0.36	106.96	57.81
Tp53i13	tumor protein p53 inducible protein 13 [Source:RGD Symbol;Acc:1559818]	1.70527	0.017	0.41	35.55	19.41
Grb7	growth factor receptor bound protein 7 [Source:RGD Symbol;Acc:619759]	1.70527	0.017	0.41	15.88	8.67
N6amt1	N-6 adenine-specific DNA methyltransferase 1 [Source:RGD Symbol;Acc:1311843]	1.70527	0.049	0.7	7.26	3.95
Naa60	N(alpha)-acetyltransferase 60, NatF catalytic subunit [Source:RGD Symbol;Acc:1308915]	1.69349	0.016	0.4	51.63	28.22
RGD1565355	similar to fatty acid translocase/CD36 [Source:RGD Symbol;Acc:1565355]	1.69349	0.02	0.44	16.1	6.98
Arhgap21	Rho GTPase activating protein 21 [Source:RGD Symbol;Acc:1311028]	1.69349	0.02	0.44	5.2	2.86
Klhl21	kelch-like family member 21 [Source:RGD Symbol;Acc:1305863]	1.69349	0.021	0.45	7.55	4.16
Sstr3	somatostatin receptor 3 [Source:RGD Symbol;Acc:620308]	1.69349	0.023	0.46	6.89	3.79
Atf6	activating transcription factor 6 [Source:RGD Symbol;Acc:1305471]	1.69349	0.025	0.5	3.94	2.17
Cyp7b1	cytochrome P450 family 7 subfamily B member 1 [Source:RGD Symbol;Acc:2483]	1.69349	0.035	0.59	5.47	3.15
Nr0b2	nuclear receptor subfamily 0, group B, member 2 [Source:RGD Symbol;Acc:621032]	1.68179	0.02	0.44	47.32	26.2
Chd1l	chromodomain helicase DNA binding protein 1-like [Source:RGD Symbol;Acc:1311935]	1.68179	0.024	0.49	10.16	5.63
Armc10	armadillo repeat containing 10 [Source:RGD Symbol;Acc:1305915]	1.68179	0.038	0.61	6.5	3.61
Pus3	pseudouridine synthase 3 [Source:RGD Symbol;Acc:1310757]	1.68179	0.041	0.64	6.66	3.69
Phgdh	phosphoglycerate dehydrogenase [Source:RGD Symbol;Acc:61987]	1.68179	0.043	0.66	5.47	3.04
Apon	apolipoprotein N [Source:RGD Symbol;Acc:1311384]	1.67018	0.018	0.42	219.45	122.42
Ndst2	N-deacetylase and N-sulfotransferase 2 [Source:RGD Symbol;Acc:1304700]	1.67018	0.024	0.48	9.55	5.33
Osbpl3	oxysterol binding protein-like 3 [Source:RGD Symbol;Acc:1564287]	1.67018	0.029	0.54	2.67	1.49
Rab30	RAB30, member RAS oncogene family [Source:RGD Symbol;Acc:1309507]	1.67018	0.036	0.6	12.68	7.24
Nol8	nucleolar protein 8 [Source:RGD Symbol;Acc:1309551]	1.67018	0.044	0.67	1.94	1.08
Gys2	glycogen synthase 2 [Source:RGD Symbol;Acc:2773]	1.65864	0.02	0.43	62.08	34.87
Slc22a23	solute carrier family 22, member 23 [Source:RGD Symbol;Acc:620302]	1.65864	0.02	0.43	25.27	14.22
Zfp622	zinc finger protein 622 [Source:RGD Symbol;Acc:1309146]	1.65864	0.021	0.44	35.16	20.87
Dnajb9	DnaJ heat shock protein family (Hsp40) member B9 [Source:RGD Symbol;Acc:3070]	1.65864	0.022	0.46	34.68	19.71
Snrnp25	small nuclear ribonucleoprotein U11/U12 subunit 25 [Source:RGD Symbol;Acc:1310922]	1.65864	0.022	0.46	113.36	63.41
Abhd13	abhydrolase domain containing 13 [Source:RGD Symbol;Acc:1308317]	1.65864	0.025	0.49	6.53	3.66
Cxcl14	C-X-C motif chemokine ligand 14 [Source:RGD Symbol;Acc:1307406]	1.65864	0.031	0.56	13.28	7.45
N4bp2l1	NEDD4 binding protein 2-like 1 [Source:RGD Symbol;Acc:1595713]	1.65864	0.037	0.6	6.75	3.78
Nmrk1	nicotinamide riboside kinase 1 [Source:RGD Symbol;Acc:1564687]	1.65864	0.046	0.68	6.44	3.61
Slc27a5	solute carrier family 27 member 5 [Source:RGD Symbol;Acc:708535]	1.64718	0.02	0.43	377.17	212.79
LOC501233	LRRGT00080 [Source:RGD Symbol;Acc:1564453]	1.64718	0.02	0.44	693.19	397.73
Hamp	hepcidin antimicrobial peptide [Source:RGD Symbol;Acc:70971]	1.64718	0.02	0.44	2574.82	1432.34
Eif4ebp2	eukaryotic translation initiation factor 4E binding protein 2 [Source:RGD Symbol;Acc:1310824]	1.64718	0.027	0.52	22.06	12.46
LOC100909849	frizzled-8-like [Source:RGD Symbol;Acc:6501129]	1.64718	0.029	0.55	9.17	5.19
Fzd8	frizzled class receptor 8 [Source:RGD Symbol;Acc:1560525]	1.64718	0.029	0.55	9.17	5.19
LOC686087	similar to motile sperm domain containing 1 [Source:RGD Symbol;Acc:1586609]	1.64718	0.037	0.6	7.77	4.38
Dock11	dedicator of cytokinesis 11 [Source:RGD Symbol;Acc:1564707]	1.64718	0.047	0.69	1.67	0.94
Cpn2	carboxypeptidase N subunit 2 [Source:RGD Symbol;Acc:1305170]	1.6245	0.025	0.5	52.89	30.25
Sall1	spalt-like transcription factor 1 [Source:RGD Symbol;Acc:1309916]	1.6245	0.026	0.5	37.83	21.76
Igfbp1	insulin-like growth factor binding protein 1 [Source:RGD Symbol;Acc:2872]	1.6245	0.028	0.53	63.29	36.35
Smarca2	SWI/SNF related, matrix associated, actin dependent regulator of chromatin, subfamily a, member 2 [Source:RGD Symbol;Acc:1302988]	1.6245	0.04	0.63	4.28	2.46
Sat2	spermidine/spermine N1-acetyltransferase family member 2 [Source:RGD Symbol;Acc:1307869]	1.6245	0.045	0.68	20.32	11.6
Mpp5	membrane palmitoylated protein 5 [Source:RGD Symbol;Acc:1308071]	1.6245	0.046	0.68	3.05	1.75
Rasgef1b	RasGEF domain family, member 1B [Source:RGD Symbol;Acc:1562220]	1.6245	0.047	0.69	8.08	4.64
Akr1c14	aldo-keto reductase family 1, member C14 [Source:RGD Symbol;Acc:708361]	1.61328	0.026	0.5	554.47	319.98
Hspa8	heat shock protein family A (Hsp70) member 8 [Source:RGD Symbol;Acc:621725]	1.61328	0.027	0.51	528.62	305.86
Ces1d	carboxylesterase 1D [Source:RGD Symbol;Acc:70896]	1.61328	0.027	0.52	453.11	261
Gls2	glutaminase 2 [Source:RGD Symbol;Acc:620359]	1.61328	0.028	0.53	86.25	49.93
Edem1	ER degradation enhancing alpha-mannosidase like protein 1 [Source:RGD Symbol;Acc:1563633]	1.61328	0.028	0.53	57.69	33.35
Cnn3	calponin 3 [Source:RGD Symbol;Acc:71044]	1.61328	0.028	0.53	70	40.42
Tspan12	tetraspanin 12 [Source:RGD Symbol;Acc:1311102]	1.61328	0.03	0.55	33.08	19.16
Upp2	uridine phosphorylase 2 [Source:RGD Symbol;Acc:1308188]	1.61328	0.031	0.56	28.05	16.24
C1qa	complement C1q A chain [Source:RGD Symbol;Acc:1306716]	1.61328	0.037	0.6	28.15	16.2
Uap1	UDP-N-acetylglucosamine pyrophosphorylase 1 [Source:RGD Symbol;Acc:1561967]	1.61328	0.042	0.65	9.94	5.77
Adamtsl4	ADAMTS-like 4 [Source:RGD Symbol;Acc:1561012]	1.60214	0.032	0.57	15.23	8.84
Tpmt	thiopurine S-methyltransferase [Source:RGD Symbol;Acc:1585162]	1.60214	0.036	0.6	42.72	24.84
Crebrf	CREB3 regulatory factor [Source:RGD Symbol;Acc:1310862]	1.60214	0.041	0.64	4.1	2.38
Zcchc17	zinc finger CCHC-type containing 17 [Source:RGD Symbol;Acc:1565267]	1.60214	0.048	0.7	10.71	6.25
Igfbp4	insulin-like growth factor binding protein 4 [Source:RGD Symbol;Acc:2875]	1.59107	0.03	0.55	657.05	384.23
LOC103694872	coiled-coil-helix-coiled-coil-helix domain-containing protein 10, mitochondrial [Source:RGD Symbol;Acc:9377836]	1.59107	0.032	0.57	729.97	427.08
Ahctf1	AT hook containing transcription factor 1 [Source:RGD Symbol;Acc:1561291]	1.59107	0.036	0.6	6.26	3.67
LOC314140	ribose-phosphate pyrophosphokinase I -like [Source:RGD Symbol;Acc:1359636]	1.59107	0.044	0.67	16.07	9.42
Osbpl2	oxysterol binding protein-like 2 [Source:RGD Symbol;Acc:1311312]	1.59107	0.045	0.68	8.84	5.19
Faahl	fatty-acid amide hydrolase-like [Source:RGD Symbol;Acc:6491947]	1.59107	0.049	0.7	10.86	6.35
Eef2	eukaryotic translation elongation factor 2 [Source:RGD Symbol;Acc:61979]	1.58008	0.034	0.58	579.64	342.93
Gpt2	glutamic--pyruvic transaminase 2 [Source:RGD Symbol;Acc:1305462]	1.58008	0.038	0.61	36.26	21.42
Entpd4	ectonucleoside triphosphate diphosphohydrolase 4 [Source:RGD Symbol;Acc:1309511]	1.58008	0.041	0.64	14.46	8.92
Hsdl2	hydroxysteroid dehydrogenase like 2 [Source:RGD Symbol;Acc:1305387]	1.58008	0.044	0.67	18.46	10.9
LOC680121	similar to heat shock protein 8 [Source:RGD Symbol;Acc:1595502]	1.56917	0.036	0.59	139.75	82.7
Mat1a	methionine adenosyltransferase 1A [Source:RGD Symbol;Acc:3050]	1.56917	0.036	0.59	1287.12	765.08
Nnmt	nicotinamide N-methyltransferase [Source:RGD Symbol;Acc:1309606]	1.56917	0.043	0.66	65.88	39.13
LOC306766	hypothetical LOC306766 [Source:RGD Symbol;Acc:1359256]	1.56917	0.045	0.68	17.12	10.16
Nfil3	nuclear factor, interleukin 3 regulated [Source:RGD Symbol;Acc:620972]	1.56917	0.047	0.68	21.25	12.65
Ak3	adenylate kinase 3 [Source:RGD Symbol;Acc:619885]	1.55833	0.042	0.66	89.88	53.49
Gne	glucosamine (UDP-N-acetyl)-2-epimerase/N-acetylmannosamine kinase [Source:RGD Symbol;Acc:69239]	1.55833	0.043	0.66	50.15	30.09
Fchsd2	FCH and double SH3 domains 2 [Source:RGD Symbol;Acc:1304812]	1.55833	0.045	0.68	14.84	9.04
Ctif	cap binding complex dependent translation initiation factor [Source:RGD Symbol;Acc:1311887]	1.55833	0.046	0.68	9.54	5.79
AABR07004549.1	\N	1.54756	0.043	0.66	1277.01	769.85
Slc16a12	solute carrier family 16, member 12 [Source:RGD Symbol;Acc:1311468]	1.54756	0.044	0.66	34.82	20.92
Fbxo31	F-box protein 31 [Source:RGD Symbol;Acc:1561069]	1.54756	0.045	0.68	54.02	32.17
RT1-N2	RT1 class Ib, locus N2 [Source:RGD Symbol;Acc:1595850]	1.54756	0.048	0.7	90.99	56.2
Coq10b	coenzyme Q10B [Source:RGD Symbol;Acc:1359509]	1.54756	0.049	0.7	35.88	21.59
Ahcy	adenosylhomocysteinase [Source:RGD Symbol;Acc:69260]	1.53688	0.044	0.67	678.91	410.92
Retsat	retinol saturase [Source:RGD Symbol;Acc:628802]	1.53688	0.047	0.68	299.62	182.05
Alas1	5'-aminolevulinate synthase 1 [Source:RGD Symbol;Acc:68392]	1.53688	0.048	0.69	78.48	47.53
Ei24	EI24, autophagy associated transmembrane protein [Source:RGD Symbol;Acc:1309868]	-1.53688	0.047	0.68	68.81	98.64
Gm2a	GM2 ganglioside activator [Source:RGD Symbol;Acc:628651]	-1.53688	0.047	0.68	109.4	156.54
Tmsb4x	thymosin beta 4, X-linked [Source:RGD Symbol;Acc:621622]	-1.53688	0.047	0.69	589.53	837.36
Dusp1	dual specificity phosphatase 1 [Source:RGD Symbol;Acc:620897]	-1.55833	0.042	0.66	64.45	93.27
Dbi	diazepam binding inhibitor, acyl-CoA binding protein [Source:RGD Symbol;Acc:2490]	-1.56917	0.036	0.6	669.36	972.89
Aox1	aldehyde oxidase 1 [Source:RGD Symbol;Acc:620528]	-1.56917	0.037	0.6	260.31	386.53
Dpt	dermatopontin [Source:RGD Symbol;Acc:1307176]	-1.56917	0.037	0.6	240.32	355.55
Tcim	transcriptional and immune response regulator [Source:RGD Symbol;Acc:6499724]	-1.56917	0.041	0.64	41.36	60.33
LOC298111	alpha2u globulin [Source:RGD Symbol;Acc:1593272]	-1.56917	0.043	0.66	121.73	176.16
Gldc	glycine decarboxylase [Source:RGD Symbol;Acc:1308660]	-1.58008	0.037	0.6	22.17	32.51
Oaz1	ornithine decarboxylase antizyme 1 [Source:RGD Symbol;Acc:3219]	-1.58008	0.037	0.6	108.7	159.33
Rassf6	Ras association domain family member 6 [Source:RGD Symbol;Acc:1566082]	-1.58008	0.046	0.68	4.11	6.06
Slc25a47	solute carrier family 25, member 47 [Source:RGD Symbol;Acc:1303247]	-1.59107	0.031	0.56	238.74	353.69
Ust5r	integral membrane transport protein UST5r [Source:RGD Symbol;Acc:620985]	-1.59107	0.033	0.57	50.76	75.15
Gna12	G protein subunit alpha 12 [Source:RGD Symbol;Acc:71018]	-1.59107	0.033	0.58	30.04	44.86
Parp14	poly (ADP-ribose) polymerase family, member 14 [Source:RGD Symbol;Acc:1310490]	-1.59107	0.034	0.58	5.88	8.74
Nrbf2	nuclear receptor binding factor 2 [Source:RGD Symbol;Acc:61937]	-1.59107	0.037	0.6	20.33	30.02
Jam3	junctional adhesion molecule 3 [Source:RGD Symbol;Acc:1303248]	-1.59107	0.043	0.66	10.8	15.98
Kcnk5	potassium two pore domain channel subfamily K member 5 [Source:RGD Symbol;Acc:1564985]	-1.59107	0.046	0.68	4.42	6.55
Akr1c12	aldo-keto reductase family 1, member C12 [Source:RGD Symbol;Acc:1359406]	-1.60214	0.029	0.54	208.09	310.5
Bmp1	bone morphogenetic protein 1 [Source:RGD Symbol;Acc:620739]	-1.60214	0.03	0.55	19.56	29.24
Col3a1	collagen type III alpha 1 chain [Source:RGD Symbol;Acc:71029]	-1.60214	0.031	0.56	11.07	16.58
Trim5	tripartite motif-containing 5 [Source:RGD Symbol;Acc:1304579]	-1.60214	0.034	0.58	11.27	16.86
Dcakd	dephospho-CoA kinase domain containing [Source:RGD Symbol;Acc:1359211]	-1.60214	0.048	0.7	7.17	10.64
Steap3	STEAP3 metalloreductase [Source:RGD Symbol;Acc:708552]	-1.60214	0.049	0.7	3.77	5.64
Cyp4a2	cytochrome P450, family 4, subfamily a, polypeptide 2 [Source:RGD Symbol;Acc:2479]	-1.61328	0.025	0.5	252.13	380.84
Ldha	lactate dehydrogenase A [Source:RGD Symbol;Acc:2996]	-1.61328	0.027	0.52	322.02	482.27
Anxa4	annexin A4 [Source:RGD Symbol;Acc:621171]	-1.61328	0.032	0.57	18.84	28.78
St3gal4	ST3 beta-galactoside alpha-2,3-sialyltransferase 4 [Source:RGD Symbol;Acc:1303068]	-1.61328	0.039	0.62	7.99	12
Casp12	caspase 12 [Source:RGD Symbol;Acc:621758]	-1.61328	0.046	0.68	8.83	13.27
Mup5	major urinary protein 5 [Source:RGD Symbol;Acc:735107]	-1.6245	0.024	0.48	765.76	1154.58
Angptl4	angiopoietin-like 4 [Source:RGD Symbol;Acc:735058]	-1.6245	0.027	0.51	40.19	60.73
Polg	DNA polymerase gamma, catalytic subunit [Source:RGD Symbol;Acc:620057]	-1.6245	0.029	0.54	8.54	12.95
Calm2	calmodulin 2 [Source:RGD Symbol;Acc:2258]	-1.6245	0.03	0.55	35.14	52.98
AABR07018078.1	PHD finger protein 11 [Source:NCBI gene;Acc:361051]	-1.6245	0.033	0.57	17.87	27
Tbc1d8	TBC1 domain family, member 8 [Source:RGD Symbol;Acc:1595491]	-1.6245	0.035	0.59	3.28	4.96
Pgrmc2	progesterone receptor membrane component 2 [Source:RGD Symbol;Acc:1308804]	-1.6358	0.024	0.48	40.54	61.81
Fbxo6	F-box protein 6 [Source:RGD Symbol;Acc:620418]	-1.6358	0.032	0.57	21.83	33.14
Cd99l2	CD99 molecule-like 2 [Source:RGD Symbol;Acc:620896]	-1.6358	0.037	0.6	3.39	6.53
Ptprn	protein tyrosine phosphatase, receptor type, N [Source:RGD Symbol;Acc:620777]	-1.6358	0.037	0.6	2.91	4.44
RGD1309730	similar to RIKEN cDNA B230118H07 [Source:RGD Symbol;Acc:1309730]	-1.6358	0.038	0.61	13.1	19.93
5330417C22Rik	RIKEN cDNA 5330417C22 gene [Source:MGI Symbol;Acc:MGI:1923930]	-1.6358	0.038	0.61	3.58	5.44
Cyp4f17	cytochrome P450, family 4, subfamily f, polypeptide 17 [Source:RGD Symbol;Acc:1561655]	-1.6358	0.038	0.61	7.43	11.93
RGD1559960	similar to Sulfotransferase K1 (rSULT1C2) [Source:RGD Symbol;Acc:1559960]	-1.6358	0.043	0.66	3.82	6.09
Tmem106a	transmembrane protein 106A [Source:RGD Symbol;Acc:1309043]	-1.6358	0.048	0.7	2.89	4.41
Lss	lanosterol synthase [Source:RGD Symbol;Acc:620955]	-1.64718	0.021	0.45	36.4	46.68
Ighm	immunoglobulin heavy constant mu [Source:MGI Symbol;Acc:MGI:96448]	-1.64718	0.023	0.46	37.5	57.3
Arhgap8	Rho GTPase activating protein 8 [Source:RGD Symbol;Acc:1303143]	-1.64718	0.029	0.54	7.54	11.57
Atg16l2	autophagy related 16-like 2 [Source:RGD Symbol;Acc:1311400]	-1.64718	0.031	0.56	7.99	12.25
Btg2	BTG anti-proliferation factor 2 [Source:RGD Symbol;Acc:2225]	-1.64718	0.031	0.56	5.96	9.17
Dusp6	dual specificity phosphatase 6 [Source:RGD Symbol;Acc:70978]	-1.64718	0.034	0.58	4.33	6.66
Mocos	molybdenum cofactor sulfurase [Source:RGD Symbol;Acc:1308496]	-1.64718	0.035	0.58	3.89	6.54
Jam2	junctional adhesion molecule 2 [Source:RGD Symbol;Acc:1561692]	-1.64718	0.041	0.65	1.96	3.01
Tnfrsf12a	TNF receptor superfamily member 12A [Source:RGD Symbol;Acc:631329]	-1.64718	0.042	0.66	9.69	14.82
Comt	catechol-O-methyltransferase [Source:RGD Symbol;Acc:2379]	-1.65864	0.019	0.43	463.15	715.19
LOC100911854	mannose-binding protein C-like [Source:RGD Symbol;Acc:6490749]	-1.65864	0.021	0.45	47.62	73.35
Gjb2	gap junction protein, beta 2 [Source:RGD Symbol;Acc:728891]	-1.65864	0.021	0.45	19.93	30.89
Rgs3	regulator of G-protein signaling 3 [Source:RGD Symbol;Acc:3566]	-1.65864	0.024	0.48	8.03	12.12
Entpd8	ectonucleoside triphosphate diphosphohydrolase 8 [Source:RGD Symbol;Acc:1561793]	-1.67018	0.02	0.43	8.52	13.28
Stx2	syntaxin 2 [Source:RGD Symbol;Acc:2558]	-1.67018	0.023	0.46	10.08	15.68
Pdcd5	programmed cell death 5 [Source:RGD Symbol;Acc:1310561]	-1.67018	0.049	0.7	11.49	17.81
AC134224.2	\N	-1.67018	0.049	0.7	8.74	13.58
St6galnac4	ST6 N-acetylgalactosaminide alpha-2,6-sialyltransferase 4 [Source:RGD Symbol;Acc:1303005]	-1.68179	0.023	0.46	6.53	10.22
Tjp3	tight junction protein 3 [Source:RGD Symbol;Acc:1309247]	-1.68179	0.024	0.47	5.2	8.25
Trim2	tripartite motif-containing 2 [Source:RGD Symbol;Acc:1310981]	-1.68179	0.04	0.64	0.95	1.49
Plp2	proteolipid protein 2 [Source:RGD Symbol;Acc:1587363]	-1.68179	0.041	0.64	6.48	10.17
Maged2	MAGE family member D2 [Source:RGD Symbol;Acc:70899]	-1.68179	0.049	0.7	2.2	3.45
Ca8	carbonic anhydrase 8 [Source:RGD Symbol;Acc:1304709]	-1.69349	0.017	0.41	35.9	56.66
Pkdcc	protein kinase domain containing, cytoplasmic [Source:RGD Symbol;Acc:1311939]	-1.69349	0.017	0.41	25.97	40.91
Cavin3	caveolae associated protein 3 [Source:RGD Symbol;Acc:628755]	-1.69349	0.018	0.43	29.93	47.06
Tspan14	tetraspanin 14 [Source:RGD Symbol;Acc:1305714]	-1.69349	0.026	0.51	8.57	13.5
Ift122	intraflagellar transport 122 [Source:RGD Symbol;Acc:1311302]	-1.69349	0.047	0.68	1.15	1.84
Ccng1	cyclin G1 [Source:RGD Symbol;Acc:2295]	-1.70527	0.015	0.38	16.86	27.33
Tpst2	tyrosylprotein sulfotransferase 2 [Source:RGD Symbol;Acc:1305331]	-1.70527	0.017	0.41	15.65	24.9
Lhx8	LIM homeobox 8 [Source:RGD Symbol;Acc:1308749]	-1.70527	0.032	0.57	4.05	6.43
Snx7	sorting nexin 7 [Source:RGD Symbol;Acc:1305480]	-1.70527	0.044	0.66	3.15	4.99
Camk2g	calcium/calmodulin-dependent protein kinase II gamma [Source:RGD Symbol;Acc:621802]	-1.70527	0.045	0.68	1.19	1.65
Myef2	myelin expression factor 2 [Source:RGD Symbol;Acc:1306547]	-1.70527	0.046	0.68	2.29	3.53
G0s2	G0/G1switch 2 [Source:RGD Symbol;Acc:1311675]	-1.71713	0.013	0.34	123.62	197.52
Sdr9c7	short chain dehydrogenase/reductase family 9C, member 7 [Source:RGD Symbol;Acc:628716]	-1.71713	0.015	0.38	14.6	23.29
Ier2	immediate early response 2 [Source:RGD Symbol;Acc:1359581]	-1.71713	0.019	0.43	13.71	21.88
Rhob	ras homolog family member B [Source:RGD Symbol;Acc:621309]	-1.71713	0.019	0.43	7.55	12.07
Gskip	GSK3B interacting protein [Source:RGD Symbol;Acc:1308470]	-1.71713	0.026	0.51	4.4	7.03
Hyal1	hyaluronidase 1 [Source:RGD Symbol;Acc:1303060]	-1.71713	0.035	0.59	3.73	5.96
Prss36	serine protease 36 [Source:RGD Symbol;Acc:1593186]	-1.71713	0.036	0.6	2.06	3.32
Zfp329	zinc finger protein 329 [Source:RGD Symbol;Acc:1565029]	-1.71713	0.04	0.63	0.48	0.77
Col5a2	collagen type V alpha 2 chain [Source:RGD Symbol;Acc:70921]	-1.71713	0.041	0.64	1.13	1.81
S1pr2	sphingosine-1-phosphate receptor 2 [Source:RGD Symbol;Acc:68334]	-1.71713	0.043	0.66	1.81	2.9
Acly	ATP citrate lyase [Source:RGD Symbol;Acc:2018]	-1.72907	0.011	0.3	51.51	83.13
Sult1e1	sulfotransferase family 1E member 1 [Source:RGD Symbol;Acc:3776]	-1.72907	0.011	0.31	281.32	452.39
Mgmt	O-6-methylguanine-DNA methyltransferase [Source:RGD Symbol;Acc:3087]	-1.72907	0.013	0.34	67.48	108.68
Tmem94	transmembrane protein 94 [Source:MGI Symbol;Acc:MGI:1919197]	-1.72907	0.016	0.39	4.76	7.66
Isyna1	inositol-3-phosphate synthase 1 [Source:RGD Symbol;Acc:1359423]	-1.72907	0.018	0.42	7.83	12.63
Lgalsl	galectin-like [Source:RGD Symbol;Acc:1307414]	-1.72907	0.022	0.46	2.67	4.32
Naa80	N(alpha)-acetyltransferase 80, NatH catalytic subunit [Source:RGD Symbol;Acc:6496422]	-1.7411	0.012	0.32	40.98	66.37
Ppdpf	pancreatic progenitor cell differentiation and proliferation factor [Source:RGD Symbol;Acc:1310660]	-1.7411	0.012	0.32	89.34	144.39
Elovl5	ELOVL fatty acid elongase 5 [Source:RGD Symbol;Acc:620583]	-1.7411	0.014	0.36	28.78	46.52
Slc2a5	solute carrier family 2 member 5 [Source:RGD Symbol;Acc:68328]	-1.7411	0.02	0.44	4.91	7.91
MGC95210	hypothetical LOC287798 [Source:RGD Symbol;Acc:1359207]	-1.7411	0.034	0.58	1.39	2.25
Il11ra1	interleukin 11 receptor subunit alpha 1 [Source:RGD Symbol;Acc:621332]	-1.75321	0.013	0.34	15.81	25.74
Slc16a4	solute carrier family 16, member 4 [Source:RGD Symbol;Acc:1359655]	-1.75321	0.014	0.35	9.54	15.62
Irf7	interferon regulatory factor 7 [Source:RGD Symbol;Acc:1307828]	-1.75321	0.014	0.36	11.34	18.47
Htatip2	HIV-1 Tat interactive protein 2 [Source:RGD Symbol;Acc:1309941]	-1.75321	0.018	0.42	8.33	13.64
LOC103690068	immortalization up-regulated protein-like [Source:RGD Symbol;Acc:9176702]	-1.75321	0.02	0.43	25.86	42.11
Dmap1	DNA methyltransferase 1-associated protein 1 [Source:RGD Symbol;Acc:1311295]	-1.75321	0.022	0.46	5.08	8.33
NEWGENE_1359268	Smad nuclear interacting protein 1 [Source:RGD Symbol;Acc:11378778]	-1.75321	0.022	0.46	3.41	5.54
Lzts3	leucine zipper tumor suppressor family member 3 [Source:RGD Symbol;Acc:631327]	-1.75321	0.024	0.48	2.65	4.34
Nme6	NME/NM23 nucleoside diphosphate kinase 6 [Source:RGD Symbol;Acc:61896]	-1.75321	0.025	0.49	4.46	7.28
AABR07069733.1	\N	-1.75321	0.028	0.54	1.5	2.46
Faim	Fas apoptotic inhibitory molecule [Source:RGD Symbol;Acc:620572]	-1.75321	0.036	0.59	5.99	9.69
Lpin1	lipin 1 [Source:RGD Symbol;Acc:1307646]	-1.76541	0.01	0.29	14.66	24.14
Trim26	tripartite motif-containing 26 [Source:RGD Symbol;Acc:1359126]	-1.76541	0.011	0.31	8.16	13.24
Cav2	caveolin 2 [Source:RGD Symbol;Acc:620348]	-1.76541	0.011	0.31	11.01	18.07
Akr1c1	aldo-keto reductase family 1, member C1 [Source:RGD Symbol;Acc:1306847]	-1.76541	0.012	0.32	18.2	29.94
Vill	villin-like [Source:RGD Symbol;Acc:1304843]	-1.76541	0.013	0.34	6.71	11.02
Mdp1	magnesium-dependent phosphatase 1 [Source:RGD Symbol;Acc:1311147]	-1.76541	0.019	0.43	4.88	8.05
Evc	EvC ciliary complex subunit 1 [Source:RGD Symbol;Acc:735186]	-1.76541	0.021	0.44	1.71	2.82
B3gnt2	UDP-GlcNAc:betaGal beta-1,3-N-acetylglucosaminyltransferase 2 [Source:RGD Symbol;Acc:1310077]	-1.76541	0.023	0.46	2.4	3.95
RGD1565616	RGD1565616 [Source:RGD Symbol;Acc:1565616]	-1.76541	0.033	0.57	0.98	1.62
Anxa7	annexin A7 [Source:RGD Symbol;Acc:621173]	-1.76541	0.034	0.58	2.31	3.8
LOC100912405	urinary protein 3-like [Source:RGD Symbol;Acc:6487535]	-1.77769	0.0079	0.24	1044.75	1713.8
RT1-A2	RT1 class Ia, locus A2 [Source:RGD Symbol;Acc:1595923]	-1.77769	0.0081	0.25	196.05	308.3
Dipk2a	divergent protein kinase domain 2A [Source:RGD Symbol;Acc:1309079]	-1.77769	0.015	0.38	2.89	4.77
Zbtb16	zinc finger and BTB domain containing 16 [Source:RGD Symbol;Acc:727921]	-1.77769	0.025	0.5	2.18	3.61
Aldh1a1	aldehyde dehydrogenase 1 family, member A1 [Source:RGD Symbol;Acc:2087]	-1.79005	0.0068	0.22	140.18	234.36
Mvd	mevalonate diphosphate decarboxylase [Source:RGD Symbol;Acc:621292]	-1.79005	0.0097	0.28	13.59	22.73
Hmox1	heme oxygenase 1 [Source:RGD Symbol;Acc:2806]	-1.79005	0.0098	0.29	14.05	23.48
Hbb-bs	hemoglobin, beta adult s chain [Source:RGD Symbol;Acc:1597422]	-1.79005	0.012	0.32	32.71	54.27
Thyn1	thymocyte nuclear protein 1 [Source:RGD Symbol;Acc:1359525]	-1.79005	0.018	0.43	9.28	15.41
Pip4p2	phosphatidylinositol-4,5-bisphosphate 4-phosphatase 2 [Source:RGD Symbol;Acc:1306225]	-1.79005	0.021	0.44	2.53	4.23
Vwce	von Willebrand factor C and EGF domains [Source:RGD Symbol;Acc:1309910]	-1.79005	0.027	0.51	2.64	4.38
Ppp1r14a	protein phosphatase 1, regulatory (inhibitor) subunit 14A [Source:RGD Symbol;Acc:620536]	-1.79005	0.028	0.54	8.6	14.31
Tyro3	TYRO3 protein tyrosine kinase [Source:RGD Symbol;Acc:3923]	-1.79005	0.03	0.55	1.1	1.82
AABR07035309.1	\N	-1.79005	0.031	0.56	3.6	6
Tspan18	tetraspanin 18 [Source:RGD Symbol;Acc:1560411]	-1.79005	0.048	0.7	0.73	1.22
Rmdn2	regulator of microtubule dynamics 2 [Source:RGD Symbol;Acc:1559836]	-1.8025	0.0088	0.26	13.27	22.23
Zfp958	zinc finger protein 958 [Source:RGD Symbol;Acc:2311392]	-1.8025	0.0088	0.26	19.09	32.13
Tap1	transporter 1, ATP binding cassette subfamily B member [Source:RGD Symbol;Acc:3817]	-1.8025	0.0091	0.27	8.36	13.96
Ccn2	cellular communication network factor 2 [Source:RGD Symbol;Acc:621392]	-1.8025	0.027	0.52	2.04	3.47
Sphk2	sphingosine kinase 2 [Source:RGD Symbol;Acc:1307757]	-1.81504	0.0078	0.24	10.92	18.49
Zfp385a	zinc finger protein 385A [Source:RGD Symbol;Acc:1593784]	-1.81504	0.0087	0.26	9.4	15.89
Insc	INSC, spindle orientation adaptor protein [Source:RGD Symbol;Acc:1311379]	-1.81504	0.01	0.29	3.74	6.62
Lgals3	galectin 3 [Source:RGD Symbol;Acc:69356]	-1.81504	0.027	0.52	5.11	8.61
Faap100	FA core complex associated protein 100 [Source:RGD Symbol;Acc:1306926]	-1.81504	0.033	0.57	0.64	1.08
Lrp5	LDL receptor related protein 5 [Source:RGD Symbol;Acc:1309329]	-1.82766	0.0063	0.21	9.23	15.72
Unc5b	unc-5 netrin receptor B [Source:RGD Symbol;Acc:621756]	-1.82766	0.011	0.29	1.82	3.11
Pak1	p21 (RAC1) activated kinase 1 [Source:RGD Symbol;Acc:3250]	-1.82766	0.014	0.36	2.72	4.6
Dcn	decorin [Source:RGD Symbol;Acc:61895]	-1.82766	0.017	0.41	3.57	6.09
Il7	interleukin 7 [Source:RGD Symbol;Acc:2904]	-1.82766	0.044	0.67	2.74	4.65
Arap1	ArfGAP with RhoGAP domain, ankyrin repeat and PH domain 1 [Source:RGD Symbol;Acc:1310385]	-1.84038	0.0053	0.19	13.83	23.7
Cxcl9	C-X-C motif chemokine ligand 9 [Source:RGD Symbol;Acc:628798]	-1.84038	0.0072	0.23	15.12	25.95
Uba7	ubiquitin-like modifier activating enzyme 7 [Source:RGD Symbol;Acc:1308323]	-1.84038	0.013	0.35	2.44	3.97
Atat1	alpha tubulin acetyltransferase 1 [Source:RGD Symbol;Acc:1303066]	-1.84038	0.016	0.39	10.07	15.72
Lrrk1	leucine-rich repeat kinase 1 [Source:RGD Symbol;Acc:1308000]	-1.84038	0.02	0.43	0.64	1.09
Kctd13	potassium channel tetramerization domain containing 13 [Source:RGD Symbol;Acc:735189]	-1.84038	0.029	0.54	2.11	3.62
Rup2	urinary protein 2 [Source:RGD Symbol;Acc:1561250]	-1.85318	0.0043	0.16	5079.38	8710.48
Spink1l	serine peptidase inhibitor, Kazal type 1-like [Source:RGD Symbol;Acc:708468]	-1.85318	0.0045	0.17	887.18	1508.27
Plgrkt	plasminogen receptor with a C-terminal lysine [Source:RGD Symbol;Acc:1306839]	-1.85318	0.033	0.57	3.42	5.9
Gas6	growth arrest specific 6 [Source:RGD Symbol;Acc:61913]	-1.86607	0.004	0.15	54.89	101.02
Clpx	caseinolytic mitochondrial matrix peptidase chaperone subunit [Source:RGD Symbol;Acc:1304883]	-1.86607	0.0042	0.16	28.73	50.12
Mpdz	multiple PDZ domain crumbs cell polarity complex component [Source:RGD Symbol;Acc:3105]	-1.86607	0.0059	0.2	2.56	4.47
Nek6	NIMA-related kinase 6 [Source:RGD Symbol;Acc:727779]	-1.86607	0.0073	0.23	6.61	11.3
Tp53bp1	tumor protein p53 binding protein 1 [Source:RGD Symbol;Acc:1308039]	-1.86607	0.013	0.34	0.95	1.66
Fbxl4	F-box and leucine-rich repeat protein 4 [Source:RGD Symbol;Acc:1305724]	-1.86607	0.017	0.41	2.05	3.56
Cchcr1	coiled-coil alpha-helical rod protein 1 [Source:RGD Symbol;Acc:1302992]	-1.86607	0.025	0.5	2.58	3.45
Hipk2	homeodomain interacting protein kinase 2 [Source:RGD Symbol;Acc:1309349]	-1.86607	0.048	0.7	0.43	0.76
Clock	clock circadian regulator [Source:RGD Symbol;Acc:620271]	-1.87905	0.0054	0.19	2.14	3.65
Ajuba	ajuba LIM protein [Source:RGD Symbol;Acc:620407]	-1.87905	0.0058	0.2	5.43	9.54
Lama5	laminin subunit alpha 5 [Source:RGD Symbol;Acc:621023]	-1.87905	0.011	0.31	0.57	1
NEWGENE_621351	collagen, type I, alpha 2 [Source:RGD Symbol;Acc:9452897]	-1.87905	0.013	0.34	1.37	2.41
Prcp	prolylcarboxypeptidase [Source:RGD Symbol;Acc:1307842]	-1.87905	0.024	0.49	1.42	2.5
Tmem177	transmembrane protein 177 [Source:RGD Symbol;Acc:1310320]	-1.87905	0.03	0.55	2.24	3.92
Lamc2	laminin subunit gamma 2 [Source:RGD Symbol;Acc:621053]	-1.87905	0.031	0.56	1.09	0.95
Lyrm9	LYR motif containing 9 [Source:RGD Symbol;Acc:1562012]	-1.87905	0.036	0.59	1.85	3.22
Ethe1	ETHE1, persulfide dioxygenase [Source:RGD Symbol;Acc:1311034]	-1.89212	0.0037	0.14	61.17	107.63
Gpm6a	glycoprotein m6a [Source:RGD Symbol;Acc:631368]	-1.89212	0.006	0.2	4.97	8.81
Mdfic	MyoD family inhibitor domain containing [Source:RGD Symbol;Acc:1309532]	-1.89212	0.0073	0.23	2.9	5.12
AC115255.1	\N	-1.89212	0.014	0.36	3.62	6.39
Smc4	structural maintenance of chromosomes 4 [Source:RGD Symbol;Acc:1306680]	-1.89212	0.015	0.38	1.12	1.98
Col4a5	collagen type IV alpha 5 chain [Source:RGD Symbol;Acc:1565499]	-1.89212	0.019	0.43	0.56	0.98
Cacna2d4	calcium voltage-gated channel auxiliary subunit alpha2delta 4 [Source:RGD Symbol;Acc:1562038]	-1.89212	0.036	0.59	0.68	1.2
AABR07000398.1	\N	-1.90528	0.0029	0.12	199.62	354.37
Acacb	acetyl-CoA carboxylase beta [Source:RGD Symbol;Acc:620500]	-1.90528	0.003	0.12	9.1	16.21
Coq8a	coenzyme Q8A [Source:RGD Symbol;Acc:1308245]	-1.90528	0.0031	0.12	50.31	88.7
AABR07048473.1	\N	-1.90528	0.0042	0.16	17.93	31.88
Ttc25	tetratricopeptide repeat domain 25 [Source:RGD Symbol;Acc:1311859]	-1.90528	0.018	0.42	1.71	3.04
Atf5	activating transcription factor 5 [Source:RGD Symbol;Acc:628902]	-1.91853	0.0028	0.12	97.78	174.42
Svil	supervillin [Source:RGD Symbol;Acc:1306354]	-1.91853	0.005	0.18	1.68	3.02
RGD1562690	similar to L-lactate dehydrogenase A chain (LDH-A) (LDH muscle subunit) (LDH-M) [Source:RGD Symbol;Acc:1562690]	-1.91853	0.0052	0.19	14.85	26.54
Tpd52l1	TPD52 like 1 [Source:RGD Symbol;Acc:1594796]	-1.91853	0.0054	0.19	12.18	22.1
Gsta6	glutathione S-transferase alpha 6 [Source:RGD Symbol;Acc:1565402]	-1.91853	0.0056	0.2	5.69	10.15
RGD1564865	similar to 20-alpha-hydroxysteroid dehydrogenase [Source:RGD Symbol;Acc:1564865]	-1.91853	0.006	0.2	10.88	19.39
Leo1	LEO1 homolog, Paf1/RNA polymerase II complex component [Source:RGD Symbol;Acc:1549772]	-1.91853	0.008	0.24	3.03	5.43
Psph	phosphoserine phosphatase [Source:RGD Symbol;Acc:1308764]	-1.91853	0.016	0.39	3.8	6.81
Myh7b	myosin heavy chain 7B [Source:RGD Symbol;Acc:1307994]	-1.91853	0.017	0.41	0.57	1.02
Nek8	NIMA-related kinase 8 [Source:RGD Symbol;Acc:1306897]	-1.91853	0.035	0.58	0.86	1.55
Ephx1	epoxide hydrolase 1 [Source:RGD Symbol;Acc:2557]	-1.93187	0.0023	0.099	1011.71	1818.93
Cnp	2',3'-cyclic nucleotide 3' phosphodiesterase [Source:RGD Symbol;Acc:2368]	-1.93187	0.0046	0.17	5.83	10.53
Coro1c	coronin 1C [Source:RGD Symbol;Acc:1564490]	-1.93187	0.0055	0.2	3.02	5.43
Tcirg1	T-cell immune regulator 1, ATPase H+ transporting V0 subunit A3 [Source:RGD Symbol;Acc:735136]	-1.94531	0.0026	0.11	12.12	21.94
Catsperg	cation channel sperm associated auxiliary subunit gamma [Source:RGD Symbol;Acc:1310942]	-1.94531	0.0087	0.26	1.38	2.5
Mnat1	MNAT1 component of CDK activating kinase [Source:RGD Symbol;Acc:628874]	-1.94531	0.02	0.43	2.65	4.8
Cdc14b	cell division cycle 14B [Source:RGD Symbol;Acc:1311163]	-1.94531	0.026	0.51	0.84	1.48
Ncald	neurocalcin delta [Source:RGD Symbol;Acc:1560287]	-1.94531	0.03	0.55	0.69	1.25
Tmem237	transmembrane protein 237 [Source:RGD Symbol;Acc:1306705]	-1.94531	0.033	0.58	0.92	1.54
Hgd	homogentisate 1, 2-dioxygenase [Source:RGD Symbol;Acc:1308757]	-1.95884	0.002	0.09	91.34	166.58
AABR07069728.1	\N	-1.95884	0.0027	0.11	18.99	34.61
Mt-nd6	mitochondrially encoded NADH dehydrogenase 6 [Source:RGD Symbol;Acc:620561]	-1.95884	0.0032	0.12	56.14	101.96
Pdk4	pyruvate dehydrogenase kinase 4 [Source:RGD Symbol;Acc:69061]	-1.95884	0.0057	0.2	5.23	9.56
Cela1	chymotrypsin like elastase 1 [Source:RGD Symbol;Acc:2547]	-1.95884	0.008	0.24	6.14	11.15
Vps45	vacuolar protein sorting 45 homolog [Source:RGD Symbol;Acc:621267]	-1.95884	0.011	0.3	2.51	4.58
LOC103689999	saccharopine dehydrogenase-like oxidoreductase [Source:RGD Symbol;Acc:9250610]	-1.97247	0.002	0.092	31.24	57.34
Adamdec1	ADAM-like, decysin 1 [Source:RGD Symbol;Acc:1309861]	-1.97247	0.0039	0.15	4.91	9.05
Tas1r1	taste 1 receptor member 1 [Source:RGD Symbol;Acc:61891]	-1.97247	0.0039	0.15	4.05	7.46
Cotl1	coactosin-like F-actin binding protein 1 [Source:RGD Symbol;Acc:1305498]	-1.97247	0.02	0.44	1.89	3.47
Mreg	melanoregulin [Source:RGD Symbol;Acc:1562333]	-1.98618	0.0017	0.08	27.78	49.95
Gtf2ird1	GTF2I repeat domain containing 1 [Source:RGD Symbol;Acc:620856]	-1.98618	0.0049	0.18	2.07	3.81
C5ar2	complement component 5a receptor 2 [Source:RGD Symbol;Acc:1303027]	-1.98618	0.015	0.39	2.78	5.12
Mical2	microtubule associated monooxygenase, calponin and LIM domain containing 2 [Source:RGD Symbol;Acc:1311773]	-1.98618	0.018	0.42	0.94	1.78
Thbs4	thrombospondin 4 [Source:RGD Symbol;Acc:62046]	-1.98618	0.019	0.43	0.91	1.69
Ryr1	ryanodine receptor 1 [Source:RGD Symbol;Acc:1586637]	-1.98618	0.02	0.43	0.17	0.31
Perp	PERP, TP53 apoptosis effector [Source:RGD Symbol;Acc:1310294]	-2	0.0017	0.08	23.9	44.57
Plcl2	phospholipase C-like 2 [Source:RGD Symbol;Acc:1305941]	-2	0.0045	0.17	2.02	3.76
Mfap4	microfibril associated protein 4 [Source:RGD Symbol;Acc:1307841]	-2	0.0062	0.2	4.25	7.91
Sectm1b	secreted and transmembrane 1B [Source:RGD Symbol;Acc:735132]	-2	0.0063	0.21	5.58	10.39
Pgpep1	pyroglutamyl-peptidase I [Source:RGD Symbol;Acc:1303133]	-2.01391	0.0022	0.095	10.58	19.88
Mmp2	matrix metallopeptidase 2 [Source:RGD Symbol;Acc:621316]	-2.01391	0.015	0.38	0.96	1.8
Tnfaip8l1	TNF alpha induced protein 8 like 1 [Source:RGD Symbol;Acc:1588574]	-2.01391	0.019	0.43	6.98	13.06
Tmbim1	transmembrane BAX inhibitor motif containing 1 [Source:RGD Symbol;Acc:1359409]	-2.01391	0.028	0.53	0.99	1.93
Aacs	acetoacetyl-CoA synthetase [Source:RGD Symbol;Acc:708522]	-2.02792	0.002	0.092	4.93	9.34
Rhoc	ras homolog family member C [Source:RGD Symbol;Acc:1304965]	-2.02792	0.0022	0.095	13.31	25.26
Chrdl1	chordin-like 1 [Source:RGD Symbol;Acc:735215]	-2.02792	0.0079	0.24	0.99	1.87
B9d1	B9 domain containing 1 [Source:RGD Symbol;Acc:1305522]	-2.02792	0.0096	0.28	5.38	10.16
RGD1306227	similar to 4833420G17Rik protein [Source:RGD Symbol;Acc:1306227]	-2.02792	0.019	0.43	1.06	2
LOC100911548	SPRY domain-containing SOCS box protein 2-like [Source:RGD Symbol;Acc:6492498]	-2.04202	0.0038	0.15	6.4	12.14
Cyp2c11	cytochrome P450, subfamily 2, polypeptide 11 [Source:RGD Symbol;Acc:2469]	-2.05623	0.00089	0.049	525.16	1003.11
Fasn	fatty acid synthase [Source:RGD Symbol;Acc:620665]	-2.05623	0.00089	0.049	28.52	54.65
LOC108348072	class II histocompatibility antigen, M alpha chain [Source:RGD Symbol;Acc:11505944]	-2.05623	0.0099	0.29	3.49	6.66
Gpsm1	G-protein signaling modulator 1 [Source:RGD Symbol;Acc:628682]	-2.05623	0.017	0.41	0.97	1.96
Papss1	3'-phosphoadenosine 5'-phosphosulfate synthase 1 [Source:RGD Symbol;Acc:1308081]	-2.05623	0.024	0.48	1.07	1.94
AC120486.11	\N	-2.05623	0.025	0.5	4.23	8.07
Src	SRC proto-oncogene, non-receptor tyrosine kinase [Source:RGD Symbol;Acc:620795]	-2.07053	0.0041	0.15	1.63	3.23
RGD1311739	similar to RIKEN cDNA 1700037H04 [Source:RGD Symbol;Acc:1311739]	-2.07053	0.0061	0.2	3.55	6.87
MGC94199	similar to RIKEN cDNA 2610301B20; EST AI428449 [Source:RGD Symbol;Acc:1549749]	-2.07053	0.031	0.56	0.86	1.64
Cxcl10	C-X-C motif chemokine ligand 10 [Source:RGD Symbol;Acc:620209]	-2.08493	0.033	0.58	1.6	3.1
Mki67	marker of proliferation Ki-67 [Source:RGD Symbol;Acc:1305476]	-2.08493	0.048	0.7	0.11	0.21
Sult1c3	sulfotransferase family 1C member 3 [Source:RGD Symbol;Acc:3768]	-2.09943	0.00066	0.039	145.22	282.87
Litaf	lipopolysaccharide-induced TNF factor [Source:RGD Symbol;Acc:69294]	-2.09943	0.0008	0.046	19.92	38.92
Scd2	stearoyl-Coenzyme A desaturase 2 [Source:RGD Symbol;Acc:621177]	-2.09943	0.0029	0.12	1.19	2.33
Tbc1d31	TBC1 domain family, member 31 [Source:RGD Symbol;Acc:1587370]	-2.09943	0.0032	0.13	1.72	3.37
Aebp1	AE binding protein 1 [Source:RGD Symbol;Acc:1306922]	-2.09943	0.01	0.29	0.71	1.39
Paqr9	progestin and adipoQ receptor family member 9 [Source:RGD Symbol;Acc:1311515]	-2.11404	0.00085	0.048	10.37	20.49
Helz2	helicase with zinc finger 2 [Source:RGD Symbol;Acc:1306056]	-2.11404	0.0012	0.061	1.66	3.28
Foxa1	forkhead box A1 [Source:RGD Symbol;Acc:2807]	-2.11404	0.0019	0.087	5.92	11.66
Jcad	junctional cadherin 5 associated [Source:RGD Symbol;Acc:1562037]	-2.11404	0.0034	0.13	1.18	2.32
Tdrd15	tudor domain containing 15 [Source:RGD Symbol;Acc:7716193]	-2.11404	0.0067	0.22	0.44	0.87
Bin2	bridging integrator 2 [Source:RGD Symbol;Acc:1306789]	-2.11404	0.011	0.3	1.43	2.82
Ccl27	C-C motif chemokine ligand 27 [Source:RGD Symbol;Acc:1304660]	-2.11404	0.012	0.33	3.58	7.01
Trim45	tripartite motif-containing 45 [Source:RGD Symbol;Acc:1309168]	-2.11404	0.019	0.43	0.84	1.67
Slc28a2	solute carrier family 28 member 2 [Source:RGD Symbol;Acc:61840]	-2.12874	0.00065	0.039	15.68	33.91
Me1	malic enzyme 1 [Source:RGD Symbol;Acc:3074]	-2.12874	0.00079	0.046	9.31	17.62
Fgf21	fibroblast growth factor 21 [Source:RGD Symbol;Acc:620175]	-2.12874	0.0042	0.16	10.35	20.44
Gpd2	glycerol-3-phosphate dehydrogenase 2 [Source:RGD Symbol;Acc:2726]	-2.12874	0.0073	0.23	1.07	1.95
LOC100910790	spondin-2-like [Source:RGD Symbol;Acc:6496621]	-2.12874	0.0095	0.28	1.51	3
Limk1	LIM domain kinase 1 [Source:RGD Symbol;Acc:62055]	-2.12874	0.03	0.55	0.46	0.91
Grk5	G protein-coupled receptor kinase 5 [Source:RGD Symbol;Acc:61985]	-2.12874	0.034	0.58	0.54	1.08
Aspa	aspartoacylase [Source:RGD Symbol;Acc:621693]	-2.12874	0.037	0.6	0.83	1.7
Tsc22d1	TSC22 domain family, member 1 [Source:RGD Symbol;Acc:3850]	-2.14355	0.00051	0.032	56.99	113.86
Cryl1	crystallin, lambda 1 [Source:RGD Symbol;Acc:631427]	-2.14355	0.00074	0.044	16.32	32.61
Clic2	chloride intracellular channel 2 [Source:RGD Symbol;Acc:1306580]	-2.14355	0.001	0.054	11.81	23.49
Caps2	calcyphosine 2 [Source:RGD Symbol;Acc:1309826]	-2.14355	0.032	0.57	0.55	1.24
Aqp8	aquaporin 8 [Source:RGD Symbol;Acc:2146]	-2.15846	0.00042	0.028	71.51	143.75
Tcea3	transcription elongation factor A3 [Source:RGD Symbol;Acc:1311369]	-2.15846	0.00071	0.042	15.83	31.91
Zfp964	zinc finger protein 964 [Source:RGD Symbol;Acc:2318713]	-2.15846	0.011	0.3	1.71	3.43
Cd9	CD9 molecule [Source:RGD Symbol;Acc:2318]	-2.15846	0.024	0.48	1.46	2.94
Trpv4	transient receptor potential cation channel, subfamily V, member 4 [Source:RGD Symbol;Acc:69337]	-2.15846	0.026	0.51	0.41	0.82
Hmgcs1	3-hydroxy-3-methylglutaryl-CoA synthase 1 [Source:RGD Symbol;Acc:70970]	-2.17347	0.00033	0.023	136.15	276.57
Arhgap18	Rho GTPase activating protein 18 [Source:RGD Symbol;Acc:1305053]	-2.17347	0.0016	0.078	2.95	6
Ccl21	C-C motif chemokine ligand 21 [Source:RGD Symbol;Acc:1311996]	-2.17347	0.0024	0.1	7.83	15.83
Homez	homeobox and leucine zipper encoding [Source:RGD Symbol;Acc:628904]	-2.17347	0.025	0.5	0.91	1.84
Slc15a3	solute carrier family 15 member 3 [Source:RGD Symbol;Acc:628663]	-2.17347	0.028	0.53	0.57	1.16
Slc39a4	solute carrier family 39 member 4 [Source:RGD Symbol;Acc:1306701]	-2.18859	0.00045	0.029	14.75	30.02
Mov10	Mov10 RISC complex RNA helicase [Source:RGD Symbol;Acc:1598327]	-2.18859	0.00085	0.048	3.19	6.49
Zfp90	zinc finger protein 90 [Source:RGD Symbol;Acc:1563077]	-2.18859	0.021	0.44	0.73	1.47
Zranb3	zinc finger RANBP2-type containing 3 [Source:RGD Symbol;Acc:1564952]	-2.18859	0.03	0.55	0.28	0.58
Cdpf1	cysteine rich, DPF motif domain containing 1 [Source:RGD Symbol;Acc:1306001]	-2.18859	0.03	0.55	1.59	3.23
Trim80	tripartite motif protein 80 [Source:RGD Symbol;Acc:1311352]	-2.20381	0.0034	0.13	1.7	3.5
Smyd4	SET and MYND domain containing 4 [Source:RGD Symbol;Acc:1307369]	-2.20381	0.032	0.57	0.32	0.66
Avpr1a	arginine vasopressin receptor 1A [Source:RGD Symbol;Acc:2185]	-2.21914	0.00033	0.023	20.84	43.13
LOC100910130	protein FAM50A-like [Source:RGD Symbol;Acc:6500228]	-2.21914	0.00086	0.048	7.5	15.56
Pld1	phospholipase D1 [Source:RGD Symbol;Acc:3349]	-2.21914	0.003	0.12	0.69	1.42
Ttc8	tetratricopeptide repeat domain 8 [Source:RGD Symbol;Acc:1307769]	-2.21914	0.009	0.27	0.97	2
Clca2	chloride channel accessory 2 [Source:RGD Symbol;Acc:1304894]	-2.21914	0.021	0.45	0.36	0.74
Col1a1	collagen type I alpha 1 chain [Source:RGD Symbol;Acc:61817]	-2.23457	0.0073	0.23	0.39	0.82
Myo7b	myosin VIIb [Source:RGD Symbol;Acc:1561153]	-2.25012	0.00028	0.02	4.37	9.17
G6pd	glucose-6-phosphate dehydrogenase [Source:RGD Symbol;Acc:2645]	-2.25012	0.00055	0.034	4.52	9.51
Il3ra	interleukin 3 receptor subunit alpha [Source:RGD Symbol;Acc:628728]	-2.25012	0.0016	0.079	3.87	8.12
Rab38	RAB38, member RAS oncogene family [Source:RGD Symbol;Acc:628752]	-2.25012	0.0022	0.096	3.09	6.46
Dok2	docking protein 2 [Source:RGD Symbol;Acc:1310966]	-2.25012	0.018	0.42	0.54	1.14
AABR07034739.1	Ig lambda-2 chain C region [Source:UniProtKB/Swiss-Prot;Acc:P20767]	-2.25012	0.018	0.42	12.64	26.08
Gins4	GINS complex subunit 4 [Source:RGD Symbol;Acc:1307397]	-2.25012	0.018	0.42	1.46	3.07
Dhcr7	7-dehydrocholesterol reductase [Source:RGD Symbol;Acc:621769]	-2.26577	0.0002	0.015	27.92	59.12
Cfb	complement factor B [Source:RGD Symbol;Acc:2204]	-2.26577	0.00037	0.025	4.88	10.29
Loxl4	lysyl oxidase-like 4 [Source:RGD Symbol;Acc:1308588]	-2.26577	0.0025	0.11	1.16	2.46
Map4k4	mitogen-activated protein kinase kinase kinase kinase 4 [Source:RGD Symbol;Acc:1305322]	-2.26577	0.0038	0.15	0.56	1.17
Slc22a8	solute carrier family 22 member 8 [Source:RGD Symbol;Acc:632286]	-2.28153	0.00022	0.017	16.31	34.63
Wfdc21	WAP four-disulfide core domain 21 [Source:RGD Symbol;Acc:1303147]	-2.28153	0.00028	0.02	126.5	264.94
Slc45a3	solute carrier family 45, member 3 [Source:RGD Symbol;Acc:1309764]	-2.28153	0.00064	0.039	2.33	4.97
Cyp2c13	cytochrome P450, family 2, subfamily c, polypeptide 13 [Source:RGD Symbol;Acc:620363]	-2.2974	0.00013	0.011	658.64	1349.92
Hao2	hydroxyacid oxidase 2 [Source:RGD Symbol;Acc:70972]	-2.2974	0.00015	0.012	45.13	97.31
Pnkd	PNKD metallo-beta-lactamase domain containing [Source:RGD Symbol;Acc:2300155]	-2.2974	0.00016	0.013	61.95	87.18
Cks2	CDC28 protein kinase regulatory subunit 2 [Source:RGD Symbol;Acc:1562047]	-2.31338	0.0018	0.085	8.34	17.89
Emc9	ER membrane protein complex subunit 9 [Source:RGD Symbol;Acc:1308113]	-2.31338	0.016	0.39	0.42	0.9
Cd276	Cd276 molecule [Source:RGD Symbol;Acc:727815]	-2.32947	0.0018	0.085	0.67	1.46
Nrcam	neuronal cell adhesion molecule [Source:RGD Symbol;Acc:3209]	-2.32947	0.015	0.39	0.26	1.34
Ppm1j	protein phosphatase, Mg2+/Mn2+ dependent, 1J [Source:RGD Symbol;Acc:1359104]	-2.32947	0.046	0.68	0.38	0.82
Mef2c	myocyte enhancer factor 2C [Source:RGD Symbol;Acc:1563119]	-2.32947	0.046	0.68	0.12	0.31
Cdkn1a	cyclin-dependent kinase inhibitor 1A [Source:RGD Symbol;Acc:69328]	-2.34567	0.00013	0.011	26.6	59.4
Adora1	adenosine A1 receptor [Source:RGD Symbol;Acc:2048]	-2.34567	0.0014	0.068	1.72	3.2
Slc25a30	solute carrier family 25, member 30 [Source:RGD Symbol;Acc:1359702]	-2.34567	0.0023	0.1	1.77	3.85
Fhl1	four and a half LIM domains 1 [Source:RGD Symbol;Acc:2615]	-2.34567	0.013	0.33	0.69	1.49
Galt	galactose-1-phosphate uridylyltransferase [Source:RGD Symbol;Acc:1306483]	-2.36199	0.00018	0.014	15.04	32.98
Popdc2	popeye domain containing 2 [Source:RGD Symbol;Acc:735226]	-2.36199	0.001	0.055	1.95	4.28
Nipal2	NIPA-like domain containing 2 [Source:RGD Symbol;Acc:1564315]	-2.36199	0.0015	0.073	1.63	3.59
Slc43a2	solute carrier family 43 member 2 [Source:RGD Symbol;Acc:1305819]	-2.36199	0.0031	0.12	0.57	1.25
Tbx19	T-box transcription factor 19 [Source:RGD Symbol;Acc:1310145]	-2.36199	0.039	0.62	0.29	0.64
LOC100911558	serine protease inhibitor Kazal-type 3-like [Source:RGD Symbol;Acc:6491835]	-2.37841	0.0005	0.032	33.38	73.47
Ror1	receptor tyrosine kinase-like orphan receptor 1 [Source:RGD Symbol;Acc:1559469]	-2.37841	0.0012	0.062	0.7	1.54
LOC680406	similar to Urinary protein 2 precursor (RUP-2) [Source:RGD Symbol;Acc:1591793]	-2.39496	5.7e-05	0.0054	679.91	1516.4
Gck	glucokinase [Source:RGD Symbol;Acc:2670]	-2.39496	9.8e-05	0.0082	10.56	25.09
Epha3	Eph receptor A3 [Source:RGD Symbol;Acc:68389]	-2.39496	0.00032	0.022	1.31	2.92
Resp18	regulated endocrine-specific protein 18 [Source:RGD Symbol;Acc:3555]	-2.39496	0.0044	0.16	4.04	8.94
Ky	kyphoscoliosis peptidase [Source:RGD Symbol;Acc:1305407]	-2.39496	0.0069	0.22	0.3	0.68
Odf3b	outer dense fiber of sperm tails 3B [Source:RGD Symbol;Acc:1564322]	-2.39496	0.011	0.3	1.8	4.03
Tubb6	tubulin, beta 6 class V [Source:RGD Symbol;Acc:1305887]	-2.39496	0.011	0.3	0.88	1.96
AABR07058158.1	\N	-2.39496	0.018	0.42	1.96	3.57
Arhgap30	Rho GTPase activating protein 30 [Source:RGD Symbol;Acc:1561419]	-2.39496	0.025	0.49	0.25	0.55
Ttll1	tubulin tyrosine ligase like 1 [Source:RGD Symbol;Acc:1309124]	-2.39496	0.036	0.6	0.43	0.97
Slco1a2	solute carrier organic anion transporter family, member 1A2 [Source:RGD Symbol;Acc:70985]	-2.39496	0.042	0.66	0.21	0.47
Cyp8b1	cytochrome P450 family 8 subfamily B member 1 [Source:RGD Symbol;Acc:71016]	-2.41162	5e-05	0.005	104.87	236.44
LOC100911186	enoyl-CoA hydratase, mitochondrial-like [Source:RGD Symbol;Acc:6494098]	-2.41162	6.9e-05	0.0064	30.75	69.23
Kynu	kynureninase [Source:RGD Symbol;Acc:71061]	-2.42839	7.2e-05	0.0065	20.03	45.26
Psmb9	proteasome 20S subunit beta 9 [Source:RGD Symbol;Acc:3427]	-2.42839	8.7e-05	0.0076	28.34	64.1
Insig2	insulin induced gene 2 [Source:RGD Symbol;Acc:631417]	-2.42839	9.1e-05	0.0078	27.15	61.17
Cish	cytokine inducible SH2-containing protein [Source:RGD Symbol;Acc:69261]	-2.42839	0.00011	0.0091	5.17	11.69
Ttc21b	tetratricopeptide repeat domain 21B [Source:RGD Symbol;Acc:1565122]	-2.42839	0.01	0.29	0.31	0.7
Akr1c3	aldo-keto reductase family 1, member C3 [Source:RGD Symbol;Acc:708428]	-2.44528	0.00081	0.046	3.43	7.84
Zbtb25	zinc finger and BTB domain containing 25 [Source:RGD Symbol;Acc:735076]	-2.44528	0.026	0.51	0.52	1.15
Gpat2	glycerol-3-phosphate acyltransferase 2, mitochondrial [Source:RGD Symbol;Acc:1304904]	-2.44528	0.026	0.51	0.33	0.75
Loxl1	lysyl oxidase-like 1 [Source:RGD Symbol;Acc:1308752]	-2.44528	0.03	0.55	0.26	0.59
Ppp1r3c	protein phosphatase 1, regulatory subunit 3C [Source:RGD Symbol;Acc:1309132]	-2.46229	4.3e-05	0.0044	20.95	48.19
Myh9l1	myosin heavy chain 9-like 1 [Source:RGD Symbol;Acc:6492022]	-2.46229	7.7e-05	0.0068	2.98	6.83
Il17rb	interleukin 17 receptor B [Source:RGD Symbol;Acc:1311392]	-2.46229	7.9e-05	0.007	7.23	16.67
Mab21l3	mab-21 like 3 [Source:RGD Symbol;Acc:1308694]	-2.46229	0.00015	0.012	2.17	4.99
LOC100363268	rCG31129-like [Source:RGD Symbol;Acc:2323372]	-2.46229	0.00088	0.049	30.79	69.37
LOC103691744	cystathionine gamma-lyase [Source:RGD Symbol;Acc:9153842]	-2.46229	0.014	0.36	0.65	1.55
Ankef1	ankyrin repeat and EF-hand domain containing 1 [Source:RGD Symbol;Acc:1304809]	-2.46229	0.02	0.43	0.3	0.68
Ogn	osteoglycin [Source:RGD Symbol;Acc:1308171]	-2.46229	0.046	0.68	0.55	1.26
Cmtm6	CKLF-like MARVEL transmembrane domain containing 6 [Source:RGD Symbol;Acc:1307765]	-2.47942	4.8e-05	0.0049	10.88	25.09
Rfc3	replication factor C subunit 3 [Source:RGD Symbol;Acc:1306832]	-2.49666	0.0041	0.16	1.53	3.54
Pdgfb	platelet derived growth factor subunit B [Source:RGD Symbol;Acc:3283]	-2.49666	0.032	0.57	0.31	0.72
Lcor	ligand dependent nuclear receptor corepressor [Source:RGD Symbol;Acc:1311704]	-2.49666	0.032	0.57	0.13	0.31
Tor3a	torsin family 3, member A [Source:RGD Symbol;Acc:1310101]	-2.51403	0.0029	0.12	1.11	2.61
AABR07030091.1	\N	-2.51403	0.0042	0.16	0.48	1.09
Olr59	olfactory receptor 59 [Source:RGD Symbol;Acc:628858]	-2.53151	4.1e-05	0.0042	7.62	18.01
Elf3	E74 like ETS transcription factor 3 [Source:RGD Symbol;Acc:1310687]	-2.53151	0.016	0.39	0.47	1.1
Akr7a3	aldo-keto reductase family 7 member A3 [Source:RGD Symbol;Acc:628635]	-2.56685	1.7e-05	0.002	87.44	208.74
Plin2	perilipin 2 [Source:RGD Symbol;Acc:728889]	-2.56685	3.2e-05	0.0034	13.73	32.73
Asap2	ArfGAP with SH3 domain, ankyrin repeat and PH domain 2 [Source:RGD Symbol;Acc:1305263]	-2.56685	0.035	0.58	0.2	0.48
AC125920.1	\N	-2.56685	0.035	0.58	1.14	2.71
Hhex	hematopoietically expressed homeobox [Source:RGD Symbol;Acc:619932]	-2.58471	1.5e-05	0.0018	44.97	108.42
MGC108823	similar to interferon-inducible GTPase [Source:RGD Symbol;Acc:1359421]	-2.58471	6e-05	0.0056	6.75	16.24
Tspo	translocator protein [Source:RGD Symbol;Acc:2228]	-2.58471	0.0002	0.015	7.49	18.04
Micalcl	MICAL C-terminal like [Source:RGD Symbol;Acc:735042]	-2.58471	0.016	0.4	0.35	0.85
Reg4	regenerating family member 4 [Source:RGD Symbol;Acc:1303341]	-2.58471	0.016	0.4	3.12	7.46
Vwa5a	von Willebrand factor A domain containing 5A [Source:RGD Symbol;Acc:735145]	-2.60268	9e-05	0.0078	2	4.84
Thra	thyroid hormone receptor alpha [Source:RGD Symbol;Acc:3857]	-2.60268	0.00047	0.031	1.45	3.5
Sh3pxd2a	SH3 and PX domains 2A [Source:RGD Symbol;Acc:1311185]	-2.62079	0.023	0.47	0.2	0.48
Gimd1	GIMAP family P-loop NTPase domain containing 1 [Source:RGD Symbol;Acc:1563706]	-2.63902	0.0016	0.077	1.35	3.32
Cd274	CD274 molecule [Source:RGD Symbol;Acc:1566211]	-2.63902	0.0073	0.23	0.57	1.4
Aurka	aurora kinase A [Source:RGD Symbol;Acc:628895]	-2.63902	0.017	0.41	0.34	0.84
Themis2	thymocyte selection associated family member 2 [Source:RGD Symbol;Acc:1561016]	-2.63902	0.037	0.6	0.13	0.32
Ppp2ca	protein phosphatase 2 catalytic subunit alpha [Source:RGD Symbol;Acc:3380]	-2.65737	5e-05	0.005	11.02	27.14
Dusp26	dual specificity phosphatase 26 [Source:RGD Symbol;Acc:1310090]	-2.65737	0.00092	0.05	1.54	3.81
LOC102550314	uncharacterized LOC102550314 [Source:RGD Symbol;Acc:7600849]	-2.65737	0.0044	0.16	0.96	2.53
Gk	glycerol kinase [Source:RGD Symbol;Acc:70893]	-2.67586	7e-06	0.00092	26.64	66.58
Fam49a	family with sequence similarity 49, member A [Source:RGD Symbol;Acc:1305961]	-2.67586	2.9e-05	0.0032	2.17	5.4
Dcst1	DC-STAMP domain containing 1 [Source:RGD Symbol;Acc:1307756]	-2.67586	0.0018	0.084	0.63	1.56
Lilrb4	leukocyte immunoglobulin like receptor B4 [Source:RGD Symbol;Acc:1359090]	-2.67586	0.026	0.51	0.37	0.92
Cyp4f39	cytochrome P450, family 4, subfamily f, polypeptide 39 [Source:RGD Symbol;Acc:1308796]	-2.69447	0.00079	0.046	0.85	2.14
LOC102549408	uncharacterized LOC102549408 [Source:RGD Symbol;Acc:7563702]	-2.69447	0.0075	0.24	0.44	1.1
AABR07044001.4	\N	-2.71321	0.018	0.42	0.27	0.68
Phlda3	pleckstrin homology-like domain, family A, member 3 [Source:RGD Symbol;Acc:1310502]	-2.73208	9e-06	0.0011	17.9	45.5
Fchsd1	FCH and double SH3 domains 1 [Source:RGD Symbol;Acc:1308240]	-2.73208	0.0013	0.065	0.31	0.8
Csmd1	CUB and Sushi multiple domains 1 [Source:RGD Symbol;Acc:1305103]	-2.75108	6.5e-05	0.0061	0.44	1.14
Spink1	serine peptidase inhibitor, Kazal type 1 [Source:RGD Symbol;Acc:3749]	-2.75108	8.5e-05	0.0075	10.27	26.29
Procr	protein C receptor [Source:RGD Symbol;Acc:1305991]	-2.75108	0.0025	0.11	1.07	2.75
Tcp11x2	t-complex 11 family, X-linked 2 [Source:RGD Symbol;Acc:1598081]	-2.75108	0.04	0.63	0.41	1.04
Tceal1	transcription elongation factor A like 1 [Source:RGD Symbol;Acc:1549724]	-2.75108	0.04	0.63	0.45	1.14
Lamb3	laminin subunit beta 3 [Source:RGD Symbol;Acc:1562668]	-2.75108	0.04	0.63	0.11	0.28
Rab7b	Rab7b, member RAS oncogene family [Source:RGD Symbol;Acc:1562617]	-2.77022	0.028	0.53	0.21	0.53
Crot	carnitine O-octanoyltransferase [Source:RGD Symbol;Acc:70908]	-2.78949	3.2e-06	0.00045	23.39	61.01
Dhrs7l1	dehydrogenase/reductase (SDR family) member 7-like 1 [Source:RGD Symbol;Acc:1308036]	-2.78949	3.3e-06	0.00046	57.4	151.06
Fabp4	fatty acid binding protein 4 [Source:RGD Symbol;Acc:69309]	-2.78949	0.019	0.43	1.37	3.53
Gdf15	growth differentiation factor 15 [Source:RGD Symbol;Acc:2674]	-2.80889	0.00029	0.021	3.44	8.98
Smtnl2	smoothelin-like 2 [Source:RGD Symbol;Acc:1585960]	-2.80889	0.0078	0.24	0.36	0.93
Pdzrn3	PDZ domain containing RING finger 3 [Source:RGD Symbol;Acc:1305250]	-2.82843	6.6e-05	0.0061	0.97	2.56
Abca4	ATP binding cassette subfamily A member 4 [Source:RGD Symbol;Acc:1309445]	-2.82843	0.0021	0.093	0.18	0.49
Cdkn1c	cyclin-dependent kinase inhibitor 1C [Source:RGD Symbol;Acc:727892]	-2.8481	0.00091	0.05	0.94	2.47
Tubb2a	tubulin, beta 2A class IIa [Source:RGD Symbol;Acc:1588452]	-2.86791	7.7e-06	0.00098	7.22	19.49
Aldh1a7	aldehyde dehydrogenase family 1, subfamily A7 [Source:RGD Symbol;Acc:620252]	-2.86791	1.8e-05	0.0021	4.75	12.75
Pnpla3	patatin-like phospholipase domain containing 3 [Source:RGD Symbol;Acc:1595843]	-2.88786	1.8e-06	0.00027	14.64	39.5
Trpm6	transient receptor potential cation channel, subfamily M, member 6 [Source:RGD Symbol;Acc:1309942]	-2.88786	0.0024	0.1	0.18	0.48
Slc25a43	solute carrier family 25, member 43 [Source:RGD Symbol;Acc:1559928]	-2.88786	0.0061	0.2	0.41	1.09
Slc22a25	solute carrier family 22, member 25 [Source:RGD Symbol;Acc:621104]	-2.88786	0.01	0.29	0.28	0.76
Nipal3	NIPA-like domain containing 3 [Source:RGD Symbol;Acc:1563439]	-2.88786	0.01	0.29	0.34	0.91
Tspoap1	TSPO associated protein 1 [Source:RGD Symbol;Acc:708563]	-2.88786	0.02	0.44	0.09	0.25
Usp27x	ubiquitin specific peptidase 27, X-linked [Source:RGD Symbol;Acc:1564628]	-2.88786	0.043	0.66	0.22	0.59
Cmya5	cardiomyopathy associated 5 [Source:RGD Symbol;Acc:1582992]	-2.92817	1.6e-05	0.0019	0.44	1.21
Ca6	carbonic anhydrase 6 [Source:RGD Symbol;Acc:70516]	-2.92817	0.00065	0.039	1.37	3.73
Mok	MOK protein kinase [Source:RGD Symbol;Acc:1309274]	-2.92817	0.001	0.054	1.09	2.72
LOC685067	similar to guanylate binding protein family, member 6 [Source:RGD Symbol;Acc:1583235]	-2.94854	0.0047	0.17	0.48	1.32
LOC103690002	histone H2A.J [Source:RGD Symbol;Acc:9140761]	-2.96905	0.00033	0.023	10.55	29.21
Prmt2	protein arginine methyltransferase 2 [Source:RGD Symbol;Acc:1565519]	-2.96905	0.0061	0.2	0.42	1.15
LOC684871	similar to Protein C8orf4 (Thyroid cancer protein 1) (TC-1) [Source:RGD Symbol;Acc:1585525]	-2.96905	0.008	0.24	6.17	17.22
Tymp	thymidine phosphorylase [Source:RGD Symbol;Acc:1305756]	-2.9897	6e-07	0.00011	71.62	199.83
Brms1l	BRMS1 like transcriptional repressor [Source:RGD Symbol;Acc:1306006]	-2.9897	0.011	0.3	0.24	0.76
Nim1k	NIM1 serine/threonine protein kinase [Source:RGD Symbol;Acc:1308116]	-3.01049	0.021	0.45	0.21	0.58
Fbln2	fibulin 2 [Source:RGD Symbol;Acc:628685]	-3.05252	0.0047	0.17	0.18	0.51
RGD1563354	RIKEN cDNA D630003M21 gene [Source:MGI Symbol;Acc:MGI:3606579]	-3.07375	0.046	0.68	0.08	0.23
Dcaf17	DDB1 and CUL4 associated factor 17 [Source:RGD Symbol;Acc:1565551]	-3.07375	0.046	0.68	0.17	0.49
Krtcap3	keratinocyte associated protein 3 [Source:RGD Symbol;Acc:1596516]	-3.07375	0.046	0.68	0.41	1.17
Syt15	synaptotagmin 15 [Source:RGD Symbol;Acc:727964]	-3.11666	0.00076	0.044	0.32	0.93
LOC103691744	cystathionine gamma-lyase [Source:RGD Symbol;Acc:9153842]	-3.16017	1.7e-07	3.4e-05	203.52	597.68
Gsn	gelsolin [Source:RGD Symbol;Acc:1303089]	-3.16017	2.5e-06	0.00037	2.72	8.05
Cxcl1	C-X-C motif chemokine ligand 1 [Source:RGD Symbol;Acc:619869]	-3.18215	1e-05	0.0013	5.01	14.82
Pask	PAS domain containing serine/threonine kinase [Source:RGD Symbol;Acc:1306146]	-3.20428	0.0028	0.12	0.17	0.5
Dusp13	dual specificity phosphatase 13 [Source:RGD Symbol;Acc:1359712]	-3.20428	0.022	0.46	0.19	0.55
Spc24	SPC24 component of NDC80 kinetochore complex [Source:RGD Symbol;Acc:1307631]	-3.20428	0.022	0.46	0.57	1.69
Nupr1l1	nuclear protein, transcriptional regulator, 1-like 1 [Source:RGD Symbol;Acc:9125019]	-3.22657	0.00038	0.025	2.54	7.77
Kctd15	potassium channel tetramerization domain containing 15 [Source:RGD Symbol;Acc:1583737]	-3.22657	0.00038	0.025	0.53	1.6
Dtx4	deltex E3 ubiquitin ligase 4 [Source:RGD Symbol;Acc:1311767]	-3.22657	0.00051	0.032	1.03	2.14
Ccdc141	coiled-coil domain containing 141 [Source:RGD Symbol;Acc:1593250]	-3.22657	0.00064	0.039	0.14	0.42
Rhpn1	rhophilin, Rho GTPase binding protein 1 [Source:RGD Symbol;Acc:1305688]	-3.24901	0.0017	0.08	0.42	3.16
Zdhhc2	zinc finger DHHC-type palmitoyltransferase 2 [Source:RGD Symbol;Acc:628681]	-3.27161	0.00013	0.01	1.09	3.32
Ankrd6	ankyrin repeat domain 6 [Source:RGD Symbol;Acc:1583731]	-3.27161	0.032	0.57	0.07	0.21
Prc1	protein regulator of cytokinesis 1 [Source:RGD Symbol;Acc:1311754]	-3.27161	0.032	0.57	0.11	0.34
Hsh2d	hematopoietic SH2 domain containing [Source:RGD Symbol;Acc:2321939]	-3.27161	0.032	0.57	0.14	0.43
Insig1	insulin induced gene 1 [Source:RGD Symbol;Acc:708457]	-3.29436	6.3e-08	1.4e-05	48.08	148.11
Olr1353	olfactory receptor 1353 [Source:RGD Symbol;Acc:1333848]	-3.29436	0.00031	0.022	1.55	4.75
Gale	UDP-galactose-4-epimerase [Source:RGD Symbol;Acc:621493]	-3.34035	1.5e-06	0.00024	4.25	13.2
Filip1l	filamin A interacting protein 1-like [Source:RGD Symbol;Acc:1565927]	-3.34035	0.00025	0.018	0.31	0.96
Tp73	tumor protein p73 [Source:RGD Symbol;Acc:1307083]	-3.36359	0.006	0.2	0.11	0.34
Ankrd13b	ankyrin repeat domain 13B [Source:RGD Symbol;Acc:1564005]	-3.36359	0.049	0.7	0.15	0.46
Lum	lumican [Source:RGD Symbol;Acc:620984]	-3.41054	0.0045	0.17	0.31	0.97
Cldn5	claudin 5 [Source:RGD Symbol;Acc:68431]	-3.43426	0.008	0.24	0.35	1.13
Fgr	FGR proto-oncogene, Src family tyrosine kinase [Source:RGD Symbol;Acc:621319]	-3.45815	0.00019	0.014	0.48	1.74
Gem	GTP binding protein overexpressed in skeletal muscle [Source:RGD Symbol;Acc:1307386]	-3.45815	0.022	0.46	0.22	0.7
Chka	choline kinase alpha [Source:RGD Symbol;Acc:61944]	-3.4822	3.5e-08	8.7e-06	11.33	36.58
Arhgef19	Rho guanine nucleotide exchange factor 19 [Source:RGD Symbol;Acc:1304766]	-3.4822	4.9e-08	1.1e-05	5.87	19
Gria3	glutamate ionotropic receptor AMPA type subunit 3 [Source:RGD Symbol;Acc:70958]	-3.4822	7e-07	0.00012	1	3.26
AABR07004397.2	\N	-3.4822	0.006	0.2	1.93	6.21
Vxn	vexin [Source:RGD Symbol;Acc:1561849]	-3.50642	1.1e-07	2.4e-05	3.1	10.13
Fam169b	family with sequence similarity 169, member B [Source:RGD Symbol;Acc:1585883]	-3.53081	5.5e-05	0.0053	0.55	1.8
Unc5c	unc-5 netrin receptor C [Source:RGD Symbol;Acc:735109]	-3.53081	0.011	0.3	0.04	0.14
Dkk2	dickkopf WNT signaling pathway inhibitor 2 [Source:RGD Symbol;Acc:1308639]	-3.5801	0.0058	0.2	0.13	0.43
AABR07029596.1	\N	-3.5801	0.0058	0.2	0.31	1.04
Ednra	endothelin receptor type A [Source:RGD Symbol;Acc:2535]	-3.605	0.00075	0.044	0.17	0.56
Ctsw	cathepsin W [Source:RGD Symbol;Acc:1309354]	-3.605	0.033	0.57	0.2	0.66
Cit	citron rho-interacting serine/threonine kinase [Source:RGD Symbol;Acc:70878]	-3.605	0.033	0.57	0.04	0.14
Rps6ka6	ribosomal protein S6 kinase A6 [Source:RGD Symbol;Acc:1560817]	-3.605	0.033	0.57	0.07	0.24
Cdkn3	cyclin-dependent kinase inhibitor 3 [Source:RGD Symbol;Acc:1307781]	-3.605	0.033	0.57	0.37	1.24
Slc14a1	solute carrier family 14 member 1 (Kidd blood group) [Source:RGD Symbol;Acc:3688]	-3.605	0.033	0.57	0.08	0.26
AABR07068316.2	\N	-3.605	0.033	0.57	0.41	1.36
LOC103690139	probable N-acetyltransferase CML6 [Source:RGD Symbol;Acc:9150396]	-3.63008	7.2e-05	0.0065	1.8	6.09
Bhmt	betaine-homocysteine S-methyltransferase [Source:RGD Symbol;Acc:621496]	-3.65533	4.7e-09	1.4e-06	317.35	1078.33
Ocstamp	osteoclast stimulatory transmembrane protein [Source:RGD Symbol;Acc:1308620]	-3.65533	0.016	0.39	0.17	0.58
St6galnac2	ST6 N-acetylgalactosaminide alpha-2,6-sialyltransferase 2 [Source:RGD Symbol;Acc:1560747]	-3.68075	0.0078	0.24	0.2	0.7
Ntng1	netrin G1 [Source:RGD Symbol;Acc:1563465]	-3.68075	0.0078	0.24	0.1	0.33
Nkg7	natural killer cell granule protein 7 [Source:RGD Symbol;Acc:621523]	-3.70635	0.0042	0.16	0.65	2.23
Sigmar1	sigma non-opioid intracellular receptor 1 [Source:RGD Symbol;Acc:68364]	-3.81055	2.1e-09	6.7e-07	44.7	158.3
Gadd45g	growth arrest and DNA-damage-inducible, gamma [Source:RGD Symbol;Acc:1311796]	-3.81055	8.2e-09	2.2e-06	15.85	56.29
Pla2g7	phospholipase A2 group VII [Source:RGD Symbol;Acc:1310734]	-3.83706	0.023	0.46	0.16	0.57
St8sia1	ST8 alpha-N-acetyl-neuraminide alpha-2,8-sialyltransferase 1 [Source:RGD Symbol;Acc:3679]	-3.83706	0.023	0.46	0.15	0.55
Nlrc4	NLR family, CARD domain containing 4 [Source:RGD Symbol;Acc:1309831]	-3.83706	0.023	0.46	0.08	0.27
Hbegf	heparin-binding EGF-like growth factor [Source:RGD Symbol;Acc:2526]	-3.83706	0.023	0.46	0.12	0.42
Niban3	niban apoptosis regulator 3 [Source:RGD Symbol;Acc:1566103]	-3.83706	0.023	0.46	0.11	0.4
Lpl	lipoprotein lipase [Source:RGD Symbol;Acc:3017]	-4	1.7e-06	0.00026	0.58	2.17
Marco	macrophage receptor with collagenous structure [Source:RGD Symbol;Acc:1589662]	-4	7e-06	0.00092	1.11	4.14
Mybl1	MYB proto-oncogene like 1 [Source:RGD Symbol;Acc:1306940]	-4.02782	3.9e-09	1.2e-06	2.16	8.09
Kcnj15	potassium inwardly-rectifying channel, subfamily J, member 15 [Source:RGD Symbol;Acc:621662]	-4.02782	0.0075	0.24	0.24	0.91
Cd46	CD46 molecule [Source:RGD Symbol;Acc:3061]	-4.02782	0.0075	0.24	0.31	1.18
Inhba	inhibin subunit beta A [Source:RGD Symbol;Acc:62074]	-4.08405	1.1e-06	0.00019	0.86	3.28
Akr1c2	aldo-keto reductase family 1, member C2 [Source:RGD Symbol;Acc:1311841]	-4.08405	1.9e-05	0.0022	1.02	3.93
Dusp8	dual specificity phosphatase 8 [Source:RGD Symbol;Acc:1306425]	-4.11246	0.0022	0.095	0.25	0.94
Anxa8	annexin A8 [Source:RGD Symbol;Acc:1307719]	-4.14106	3e-06	0.00043	0.93	3.58
Begain	brain-enriched guanylate kinase-associated [Source:RGD Symbol;Acc:708347]	-4.16986	0.034	0.58	0.09	0.28
Gas2l3	growth arrest-specific 2 like 3 [Source:RGD Symbol;Acc:1594151]	-4.16986	0.034	0.58	0.03	0.11
Tmie	transmembrane inner ear [Source:RGD Symbol;Acc:1562523]	-4.16986	0.034	0.58	0.08	0.3
Ccnf	cyclin F [Source:RGD Symbol;Acc:67401]	-4.19887	3e-06	0.00043	0.49	1.93
Ubd	ubiquitin D [Source:RGD Symbol;Acc:69418]	-4.25748	3.1e-10	1.1e-07	41.81	165.25
Lox	lysyl oxidase [Source:RGD Symbol;Acc:3015]	-4.25748	3.6e-05	0.0039	0.2	0.79
Optc	opticin [Source:RGD Symbol;Acc:1304916]	-4.25748	0.0016	0.076	0.37	1.51
Ddx11	DEAD/H-box helicase 11 [Source:RGD Symbol;Acc:1306675]	-4.40762	0.0036	0.14	0.16	0.67
Gstm3l	glutathione S-transferase mu 3-like [Source:RGD Symbol;Acc:620381]	-4.43828	2.2e-08	5.7e-06	6.84	28.13
Scd	stearoyl-CoA desaturase [Source:RGD Symbol;Acc:621176]	-4.46915	1.7e-11	7.3e-09	196.32	820.65
Efemp1	EGF containing fibulin extracellular matrix protein 1 [Source:RGD Symbol;Acc:1308528]	-4.46915	0.0014	0.069	0.2	0.83
Zbp1	Z-DNA binding protein 1 [Source:RGD Symbol;Acc:619956]	-4.46915	0.022	0.46	0.12	0.52
Zfp449	zinc finger protein 449 [Source:RGD Symbol;Acc:1584453]	-4.46915	0.022	0.46	0.06	0.21
Acpp	acid phosphatase, prostate [Source:RGD Symbol;Acc:2023]	-4.50023	2.4e-05	0.0027	0.3	0.8
Gckr	glucokinase regulator [Source:RGD Symbol;Acc:2671]	-4.56305	1.9e-11	8e-09	26.34	111.58
AABR07021930.1	\N	-4.75683	6.3e-07	0.00011	1.18	5.21
LOC100912068	hypermethylated in cancer 1 protein-like [Source:RGD Symbol;Acc:6488990]	-4.78991	0.014	0.37	0.09	0.42
Col8a1	collagen type VIII alpha 1 chain [Source:RGD Symbol;Acc:1309361]	-4.78991	0.014	0.37	0.04	0.2
Pnpla5	patatin-like phospholipase domain containing 5 [Source:RGD Symbol;Acc:1307495]	-4.92458	1.8e-10	6.7e-08	2.6	11.9
Atp2b2	ATPase plasma membrane Ca2+ transporting 2 [Source:RGD Symbol;Acc:2176]	-4.92458	4.3e-07	8.1e-05	0.17	0.82
Klhdc8a	kelch domain containing 8A [Source:RGD Symbol;Acc:1305132]	-4.99332	1.1e-06	0.00019	0.33	1.52
Rbbp8nl	RBBP8 N-terminal like [Source:RGD Symbol;Acc:1596090]	-5.02805	4.3e-06	0.00058	0.16	0.76
Arhgef16	Rho guanine nucleotide exchange factor 16 [Source:RGD Symbol;Acc:1588981]	-5.02805	0.0001	0.0087	0.12	0.55
Slit3	slit guidance ligand 3 [Source:RGD Symbol;Acc:69311]	-5.1337	0.0094	0.28	0.03	0.16
Rbp7	retinol binding protein 7 [Source:RGD Symbol;Acc:1562168]	-5.1337	0.0094	0.28	0.44	2.08
AABR07044404.1	\N	-5.24157	7.1e-07	0.00012	0.6	2.86
Sdr16c6	short chain dehydrogenase/reductase family 16C, member 6 [Source:RGD Symbol;Acc:1562060]	-5.27803	5.6e-05	0.0054	0.34	1.67
Cdk6	cyclin-dependent kinase 6 [Source:RGD Symbol;Acc:621121]	-5.27803	0.0021	0.094	0.19	0.94
Tspo2	translocator protein 2 [Source:RGD Symbol;Acc:1594018]	-5.27803	0.033	0.57	0.45	2.22
Rspo1	R-spondin 1 [Source:RGD Symbol;Acc:1565558]	-5.27803	0.033	0.57	0.08	0.4
Kntc1	kinetochore associated 1 [Source:RGD Symbol;Acc:1307905]	-5.27803	0.033	0.57	0.02	0.1
Terc	telomerase RNA component [Source:RGD Symbol;Acc:727802]	-5.27803	0.033	0.57	0.61	2.97
Adam8	ADAM metallopeptidase domain 8 [Source:RGD Symbol;Acc:1566394]	-5.31474	2.4e-12	1.3e-09	3.63	18.04
Kcnn4	potassium calcium-activated channel subfamily N member 4 [Source:RGD Symbol;Acc:621476]	-5.42642	0.0062	0.2	0.12	0.48
Cdh13	cadherin 13 [Source:RGD Symbol;Acc:619745]	-5.54044	1.2e-11	5.1e-09	1.34	6.87
Abcb9	ATP binding cassette subfamily B member 9 [Source:RGD Symbol;Acc:620254]	-5.54044	0.0014	0.071	0.05	0.24
Slc34a2	solute carrier family 34 member 2 [Source:RGD Symbol;Acc:620889]	-5.6962	4e-12	2.1e-09	1.24	6.55
Cttn	cortactin [Source:RGD Symbol;Acc:619839]	-5.77572	1e-11	4.9e-09	1.46	7.79
Adgrg2	adhesion G protein-coupled receptor G2 [Source:RGD Symbol;Acc:628618]	-5.77572	1.5e-07	3.1e-05	0.21	1.14
Col20a1	collagen type XX alpha 1 chain [Source:RGD Symbol;Acc:1563901]	-5.77572	0.02	0.44	0.03	0.16
Msantd1	Myb/SANT DNA binding domain containing 1 [Source:RGD Symbol;Acc:1565796]	-5.77572	0.02	0.44	0.03	0.14
LOC685048	similar to paired immunoglobin-like type 2 receptor beta [Source:RGD Symbol;Acc:1583253]	-5.77572	0.02	0.44	0.12	0.73
Arntl2	aryl hydrocarbon receptor nuclear translocator-like 2 [Source:RGD Symbol;Acc:620230]	-5.77572	0.037	0.6	0	0.25
Rassf10	Ras association domain family member 10 [Source:RGD Symbol;Acc:1309847]	-5.77572	0.037	0.6	0	0.25
Thap2	THAP domain containing 2 [Source:RGD Symbol;Acc:1593643]	-5.77572	0.037	0.6	0	0.75
RGD1564463	similar to Mdes protein [Source:RGD Symbol;Acc:1564463]	-5.77572	0.037	0.6	0	0.22
Misp	mitotic spindle positioning [Source:RGD Symbol;Acc:1595680]	-5.77572	0.037	0.6	0	0.14
Crabp2	cellular retinoic acid binding protein 2 [Source:RGD Symbol;Acc:62070]	-5.77572	0.037	0.6	0	0.56
AABR07029661.1	fatty acid hydroxylase domain containing 2 [Source:NCBI gene;Acc:691221]	-5.77572	0.037	0.6	0	0.44
Pcdhga8	protocadherin gamma subfamily A, 8 [Source:RGD Symbol;Acc:1310676]	-5.77572	0.037	0.6	0	0.15
AABR07045487.1	\N	-5.77572	0.037	0.6	0	1.01
LOC103690050	katanin p60 ATPase-containing subunit A-like 1 [Source:RGD Symbol;Acc:9405013]	-5.77572	0.037	0.6	0	0.26
Vav1	vav guanine nucleotide exchange factor 1 [Source:RGD Symbol;Acc:3951]	-5.77572	0.037	0.6	0	0.14
Ebi3	Epstein-Barr virus induced 3 [Source:RGD Symbol;Acc:1589467]	-5.77572	0.037	0.6	0	0.33
Ccnt1	cyclin T1 [Source:RGD Symbol;Acc:1311151]	-5.77572	0.037	0.6	0	0.18
Ripply1	ripply transcriptional repressor 1 [Source:RGD Symbol;Acc:1588264]	-5.77572	0.037	0.6	0	1
LOC103690156	galanin receptor type 2 [Source:RGD Symbol;Acc:9251670]	-5.77572	0.037	0.6	0	0.25
Cldn1	claudin 1 [Source:RGD Symbol;Acc:68422]	-5.89708	6.6e-13	4e-10	1.9	10.45
LOC102556085	sodium/nucleoside cotransporter 2-like [Source:RGD Symbol;Acc:7516973]	-6.23332	0.00044	0.029	0.55	3.06
AABR07019392.1	\N	-6.23332	0.013	0.34	0.17	0.98
Dusp13	dual specificity phosphatase 13 [Source:RGD Symbol;Acc:1359712]	-6.23332	0.013	0.34	0.08	0.48
LOC367975	similar to B-cell translocation gene 1 [Source:RGD Symbol;Acc:1598239]	-6.23332	0.013	0.34	0.1	0.59
Ltc4s	leukotriene C4 synthase [Source:RGD Symbol;Acc:620677]	-6.54322	9.2e-05	0.0079	1.07	6.45
Pcdh7	protocadherin 7 [Source:RGD Symbol;Acc:1303209]	-6.72717	0.008	0.24	0.04	0.23
Podnl1	podocan-like 1 [Source:RGD Symbol;Acc:1307753]	-6.72717	0.02	0.43	0	0.17
Lca5	lebercilin LCA5 [Source:RGD Symbol;Acc:1308555]	-6.72717	0.02	0.43	0	0.13
Aqp7	aquaporin 7 [Source:RGD Symbol;Acc:2145]	-6.72717	0.02	0.43	0	0.36
Clstn3	calsyntenin 3 [Source:RGD Symbol;Acc:621153]	-6.72717	0.02	0.43	0	0.1
Kif6	kinesin family member 6 [Source:RGD Symbol;Acc:621070]	-6.72717	0.02	0.43	0	0.18
Minar1	membrane integral NOTCH2 associated receptor 1 [Source:RGD Symbol;Acc:1591930]	-6.72717	0.02	0.43	0	0.14
Morn4	MORN repeat containing 4 [Source:RGD Symbol;Acc:1307336]	-6.72717	0.02	0.43	0	0.26
LOC100911027	protein MAL2-like [Source:RGD Symbol;Acc:6495253]	-6.72717	0.02	0.43	0	0.7
Ly49s7	Ly49 stimulatory receptor 7 [Source:RGD Symbol;Acc:1359503]	-6.72717	0.02	0.43	0	0.39
Cdkl2	cyclin dependent kinase like 2 [Source:RGD Symbol;Acc:1309625]	-6.86852	1.2e-05	0.0014	0.11	0.74
Pdlim4	PDZ and LIM domain 4 [Source:RGD Symbol;Acc:3575]	-7.1602	9.7e-10	3.3e-07	1.08	7.25
MGC105649	hypothetical LOC302884 [Source:RGD Symbol;Acc:1359583]	-7.21	0.005	0.18	0.13	0.88
Tmem252	transmembrane protein 252 [Source:RGD Symbol;Acc:1359349]	-7.51618	1.3e-08	3.6e-06	0.36	2.53
Sult4a1	sulfotransferase family 4A, member 1 [Source:RGD Symbol;Acc:69292]	-7.56846	2.2e-08	5.7e-06	0.31	2.16
Arhgap22	Rho GTPase activating protein 22 [Source:RGD Symbol;Acc:1307237]	-7.67411	0.0032	0.12	0.07	0.43
LOC103689983	hypoxanthine-guanine phosphoribosyltransferase [Source:RGD Symbol;Acc:9163824]	-7.67411	0.01	0.29	0	0.96
Cyp1b1	cytochrome P450, family 1, subfamily b, polypeptide 1 [Source:RGD Symbol;Acc:2460]	-7.67411	0.01	0.29	0	0.12
AC114233.1	\N	-7.67411	0.01	0.29	0	1.04
Gdf1	growth differentiation factor 1 [Source:RGD Symbol;Acc:1304678]	-7.67411	0.01	0.29	0	0.18
Fndc1	fibronectin type III domain containing 1 [Source:RGD Symbol;Acc:1310640]	-7.67411	0.01	0.29	0	0.07
Cenpw	centromere protein W [Source:RGD Symbol;Acc:1593465]	-7.67411	0.01	0.29	0	0.32
AABR07025140.1	\N	-7.67411	0.01	0.29	0	0.11
LOC103694878	glutathione S-transferase theta-2-like [Source:RGD Symbol;Acc:9417129]	-7.67411	0.01	0.29	0.24	25.83
Rnf150	ring finger protein 150 [Source:RGD Symbol;Acc:1304572]	-7.67411	0.049	0.7	0.02	0.17
Fignl1	fidgetin-like 1 [Source:RGD Symbol;Acc:1307112]	-7.67411	0.049	0.7	0.02	0.16
Gpr176	G protein-coupled receptor 176 [Source:RGD Symbol;Acc:621718]	-7.67411	0.049	0.7	0.02	0.12
Epb41l3	erythrocyte membrane protein band 4.1-like 3 [Source:RGD Symbol;Acc:71089]	-7.67411	0.049	0.7	0.03	0.13
Il17rd	interleukin 17 receptor D [Source:RGD Symbol;Acc:1565237]	-7.67411	0.049	0.7	0.03	0.19
Stard6	StAR-related lipid transfer domain containing 6 [Source:RGD Symbol;Acc:1359639]	-7.67411	0.049	0.7	0.07	0.48
Vldlr	very low density lipoprotein receptor [Source:RGD Symbol;Acc:3963]	-7.67411	0.049	0.7	0.02	0.14
AABR07031666.1	\N	-7.67411	0.049	0.7	0.41	2.86
Tmco3	transmembrane and coiled-coil domains 3 [Source:RGD Symbol;Acc:1306586]	-7.88986	2.9e-08	7.4e-06	0.18	1.6
AC134224.3	\N	-8	2.9e-18	2.7e-15	26.98	200.94
Kcnk2	potassium two pore domain channel subfamily K member 2 [Source:RGD Symbol;Acc:621448]	-8.1681	0.002	0.09	0.06	0.28
LOC100912538	centrin-3-like [Source:RGD Symbol;Acc:6486167]	-8.51496	1.5e-10	5.8e-08	1.02	7.96
LOC691695	similar to granzyme C [Source:RGD Symbol;Acc:1597199]	-8.63383	0.0057	0.2	0	0.64
Ptgs2	prostaglandin-endoperoxide synthase 2 [Source:RGD Symbol;Acc:620349]	-8.63383	0.0057	0.2	0	0.12
Scrn1	secernin 1 [Source:RGD Symbol;Acc:1560999]	-8.63383	0.0057	0.2	0	0.1
Rtl6	retrotransposon Gag like 6 [Source:RGD Symbol;Acc:1306472]	-8.63383	0.0057	0.2	0	0.96
AABR07044820.1	\N	-8.63383	0.029	0.54	0.19	1.52
Dusp2	dual specificity phosphatase 2 [Source:RGD Symbol;Acc:1305804]	-8.63383	0.029	0.54	0.04	0.35
RGD1560730	similar to MrgB3 G protein-coupled receptor [Source:RGD Symbol;Acc:1560730]	-8.63383	0.029	0.54	0.05	0.44
Cfap53	cilia and flagella associated protein 53 [Source:RGD Symbol;Acc:1306734]	-8.63383	0.029	0.54	0.03	0.27
Tmem8b	transmembrane protein 8B [Source:RGD Symbol;Acc:1310012]	-8.63383	0.029	0.54	0.05	0.41
Peg12	paternally expressed 12 [Source:RGD Symbol;Acc:1307664]	-8.63383	0.029	0.54	0.03	0.21
Ckap2	cytoskeleton associated protein 2 [Source:RGD Symbol;Acc:1311631]	-8.63383	0.029	0.54	0.03	0.21
AABR07063279.1	\N	-8.81524	1.1e-11	5e-09	0.76	6.28
Arntl	aryl hydrocarbon receptor nuclear translocator-like [Source:RGD Symbol;Acc:62003]	-9.51366	9.2e-12	4.5e-09	0.29	2.56
Srms	src-related kinase lacking C-terminal regulatory tyrosine and N-terminal myristylation sites [Source:RGD Symbol;Acc:1306602]	-9.57983	0.0005	0.032	0.06	0.55
Entpd7	ectonucleoside triphosphate diphosphohydrolase 7 [Source:RGD Symbol;Acc:1310638]	-9.57983	0.0031	0.12	0	0.7
Mmp12	matrix metallopeptidase 12 [Source:RGD Symbol;Acc:620195]	-9.57983	0.0031	0.12	0	0.35
LOC685203	RIKEN cDNA 1700019D03 gene [Source:MGI Symbol;Acc:MGI:1914330]	-9.57983	0.0031	0.12	0	4.99
Ackr2	atypical chemokine receptor 2 [Source:RGD Symbol;Acc:620323]	-9.57983	0.0031	0.12	0	0.48
Dync2li1	dynein cytoplasmic 2 light intermediate chain 1 [Source:RGD Symbol;Acc:1310286]	-9.57983	0.017	0.41	0.05	0.46
AABR07021704.1	\N	-9.57983	0.017	0.41	0.03	0.22
Jph4	junctophilin 4 [Source:RGD Symbol;Acc:1303170]	-10.0561	1.6e-06	0.00024	0.15	1.37
LOC100911104	lymphocyte antigen 6B-like [Source:RGD Symbol;Acc:6495044]	-10.5561	0.0017	0.08	0	0.89
Col6a5	collagen type VI alpha 5 chain [Source:RGD Symbol;Acc:1565804]	-10.5561	0.0017	0.08	0	0.08
Rp1	RP1, axonemal microtubule associated [Source:RGD Symbol;Acc:1596713]	-10.5561	0.0017	0.08	0	0.09
LOC100910875	protein FAM100A-like [Source:RGD Symbol;Acc:6496445]	-10.5561	0.0017	0.08	0	2
LOC100909474	protein FAM43A-like [Source:RGD Symbol;Acc:6503176]	-10.5561	0.0017	0.08	0	0.55
Srcin1	SRC kinase signaling inhibitor 1 [Source:RGD Symbol;Acc:708439]	-10.5561	0.01	0.29	0.01	0.13
Igfn1	immunoglobulin-like and fibronectin type III domain containing 1 [Source:RGD Symbol;Acc:1565384]	-11.1579	2.2e-17	1.9e-14	0.21	2.21
Mrpl53	mitochondrial ribosomal protein L53 [Source:RGD Symbol;Acc:1306709]	-11.5514	8.3e-05	0.0073	0.76	9.19
Rtkn	rhotekin [Source:RGD Symbol;Acc:727874]	-11.5514	0.00095	0.051	0	0.29
Pcare	photoreceptor cilium actin regulator [Source:RGD Symbol;Acc:1304963]	-11.5514	0.00095	0.051	0	0.14
LOC108348130	carbonyl reductase [NADPH] 1-like [Source:RGD Symbol;Acc:11442152]	-11.5514	0.00095	0.051	0	0.9
Zp2	zona pellucida glycoprotein 2 [Source:RGD Symbol;Acc:620605]	-11.5514	0.006	0.2	0.03	0.34
Ccdc113	coiled-coil domain containing 113 [Source:RGD Symbol;Acc:1565763]	-11.5514	0.006	0.2	0.07	0.72
LOC103689977	caspase-6 [Source:RGD Symbol;Acc:9205219]	-12.042	9.4e-08	2e-05	0.16	2.26
Mup4	major urinary protein 4 [Source:RGD Symbol;Acc:735211]	-12.4666	0.00053	0.033	0	1.06
7SK	7SK RNA [Source:RFAM;Acc:RF00100]	-12.4666	0.00053	0.033	0	6.99
Zfp260	zinc finger protein 260 [Source:RGD Symbol;Acc:621205]	-13.4543	0.0003	0.021	0	0.56
P2rx5	purinergic receptor P2X 5 [Source:RGD Symbol;Acc:620256]	-13.4543	0.0003	0.021	0	0.33
Eno2	enolase 2 [Source:RGD Symbol;Acc:2554]	-13.4543	0.0003	0.021	0	0.38
Tle6	TLE family member 6, subcortical maternal complex member [Source:RGD Symbol;Acc:1561530]	-13.4543	0.0021	0.094	0.03	0.43
Gdf10	growth differentiation factor 10 [Source:RGD Symbol;Acc:621512]	-14.42	0.0013	0.064	0.03	0.38
Apba2	amyloid beta precursor protein binding family A member 2 [Source:RGD Symbol;Acc:620845]	-14.42	0.0013	0.064	0.02	0.23
AABR07060610.1	\N	-15.3482	9.8e-05	0.0082	0	3.31
LOC100909548	cation-dependent mannose-6-phosphate receptor-like [Source:RGD Symbol;Acc:6502964]	-15.3482	9.8e-05	0.0082	0	1.07
LOC108348047	low affinity immunoglobulin gamma Fc region receptor III [Source:RGD Symbol;Acc:11390928]	-15.3482	9.8e-05	0.0082	0	0.8
LOC108351063	uncharacterized LOC108351063 [Source:RGD Symbol;Acc:11477874]	-15.3482	0.00076	0.044	0.03	0.45
LOC100911692	EF-hand calcium-binding domain-containing protein 4A-like [Source:RGD Symbol;Acc:6491207]	-15.7797	6.5e-16	4.5e-13	0.46	6.5
Lmntd2	lamin tail domain containing 2 [Source:RGD Symbol;Acc:1307439]	-16.3362	5.6e-05	0.0054	0	0.35
Rprm	reprimo, TP53 dependent G2 arrest mediator homolog [Source:RGD Symbol;Acc:1595512]	-16.5642	8e-12	4e-09	0.25	3.92
LOC108348098	breast cancer metastasis-suppressor 1 homolog [Source:RGD Symbol;Acc:11501278]	-17.2677	3.3e-05	0.0035	0	1.87
Syne4	spectrin repeat containing nuclear envelope family member 4 [Source:RGD Symbol;Acc:1304580]	-18.2522	1.9e-05	0.0022	0	1.3
LOC108348083	delta-1-pyrroline-5-carboxylate synthase [Source:RGD Symbol;Acc:11512751]	-19.1597	1.1e-05	0.0014	0	0.34
LOC100911730	CD151 antigen-like [Source:RGD Symbol;Acc:6491394]	-20.8215	6.4e-26	1.5e-22	0.89	21.89
Zfp7	zinc finger protein 7 [Source:RGD Symbol;Acc:1310636]	-22.1618	2.4e-06	0.00035	0	0.85
Ccnj	cyclin J [Source:RGD Symbol;Acc:1306399]	-22.1618	2.4e-06	0.00035	0	0.32
Npas2	neuronal PAS domain protein 2 [Source:RGD Symbol;Acc:1309681]	-23.5883	2.5e-19	2.6e-16	0.12	2.64
Gstm5	glutathione S-transferase, mu 5 [Source:RGD Symbol;Acc:61964]	-24.0839	8.7e-07	0.00015	0	1.85
Map2k3	mitogen activated protein kinase kinase 3 [Source:RGD Symbol;Acc:1306620]	-25.9921	3.3e-07	6.3e-05	0	0.69
LOC103690163	zinc finger protein 420 [Source:RGD Symbol;Acc:9421075]	-27.8576	1.3e-07	2.6e-05	0	0.61
LOC108348189	COMM domain-containing protein 5 [Source:RGD Symbol;Acc:11356734]	-31.779	3.1e-08	7.7e-06	0	3.95
Sbk1	SH3 domain binding kinase 1 [Source:RGD Symbol;Acc:628713]	-52.7098	3.5e-12	1.9e-09	0	0.77
NEWGENE_1559832	ring finger protein, LIM domain interacting [Source:RGD Symbol;Acc:11393862]	-54.9482	1.7e-12	9.5e-10	0	1.58
NEWGENE_1562258	INO80 complex subunit B [Source:RGD Symbol;Acc:9421107]	-83.8652	9.2e-17	7e-14	0	5.52
LOC688583	similar to High mobility group protein 4 (HMG-4) (High mobility group protein 2a) (HMG-2a) [Source:RGD Symbol;Acc:1587596]	-97.6806	4.4e-17	3.8e-14	0.15	4.62
Dcun1d2	defective in cullin neddylation 1 domain containing 2 [Source:RGD Symbol;Acc:1582994]	-146.018	1.9e-23	3.8e-20	0	3.36
Moap1	modulator of apoptosis 1 [Source:RGD Symbol;Acc:1307230]	-229.126	6.4e-30	1.7e-26	0	8.22
AABR07073045.1	40S ribosomal protein S25-like [Source:NCBI gene;Acc:100911371]	-407.315	6.5e-39	3.5e-35	0	93.03
