# Supplementary material for: Co-regulation of Nr1d1 and Pparα in age-related changes of lipid metabolism and its modulation by calorie restriction
Source: Aging (Albany NY). 2025 Jul 28;17(7):1810–33. doi: 10.18632/aging.206289 (PMC12339034; doi:10.18632/aging.206289)
Supplement: Supplementary Table 2 [file aging-17-206289-s003.xlsx]

## Sheet: BP (Old vs Young)
Supplementary Table 2. GO terms and pathways of the DEGs from the Old vs. Young and Old-CR vs. Old datasets.
Category	ID	Term	Count	%	Fold Enrichment	pvalue	Genes
BP	GO:0007568	aging	49	4.86111	2.96248	2.87661e-11	CDKN1C, TOP2A, HSPB1, SERPINA7, CLDN1, SMPD3, CASP12, KYNU, NAMPT, TSPO, PDGFRB, PDGFRA, IL15, IGFBP2, PRKCA, TNFRSF1B, KMO, DCN, COL4A2, KCNMA1, RGN, CRYAB, CFTR, C1QA, BCL2A1, CNP, LRP1, IREB2, HMGCR, PTGS2, RTN4, ACMSD, SOCS2, SOCS3, HSPA8, NTRK2, JUN, CDKN2B, GSN, GSS, CP, AGT, GSTA3, APEX1, NAPEPLD, CYP1A1, NOX4, IFI27L2B, HAMP
BP	GO:0009410	response to xenobiotic stimulus	59	5.85317	2.26816	8.82382e-09	TOP2A, CYP4A2, TENT4A, SERPINA7, AACS, SLC22A12, CASP12, CCND1, MYC, TSPO, PRSS8, JUNB, ABCG8, ABCG5, ABCC2, IGFBP2, APOA2, CYP7B1, POR, LOX, CCNE1, MAP1B, ALDH1A1, MVD, PLIN2, CFTR, NNMT, SRC, SLC1A2, PDGFB, SLC1A3, PTN, LTC4S, PTGS2, HSD17B7, ADIPOR2, ACACB, ACACA, NPAS2, CYP17A1, SOCS3, RELN, SLCO1B2, HMOX1, SLITRK5, CYP2C6V1, EGR1, HSPA8, JUN, AKR1C1, GSS, DAB1, GSTA3, APEX1, CYP1A2, LCN2, CY…
BP	GO:0032355	response to estradiol	33	3.27381	3.1483	1.70983e-08	GPI, RAMP2, GSTP1, PDGFB, CXCL1, PTN, PTGS2, HSD17B7, EGFR, SOCS2, CYP3A9, SOCS3, CCND1, MYC, CYP1B1, PDGFRB, ABCC3, HSPA8, STAT5B, PDGFRA, ABCC2, IGFBP2, WNT7A, PRKCA, BMP7, ESR1, AGT, CCNE1, MMP15, MAP1B, CYP1A2, ALDH1A1, CRYAB
BP	GO:0006805	xenobiotic metabolic process	19	1.88492	4.29521	3.1931e-07	GSTP1, LOC100361547, FMO1, CYP46A1, FMO5, CYP26A1, CYP2J10, CYP2C12, CYP2U1, CYP2C11, GSTA3, CYP2T1, CYP2D4, CYP1A2, AOX3, CYP1A1, CYP2F4, CYP1B1, CYP2C6V1
BP	GO:0008202	steroid metabolic process	15	1.4881	5.37875	4.42837e-07	AKR1C1, AKR1C3, AKR1C2, CYP3A18, CYP17A1, CYP3A9, CYP2C11, AKR1C15, CYP2D4, HSD17B2, CYP1A1, CYP1B1, RGD1559459, CYP2C6V1, SULT4A1
BP	GO:0043065	positive regulation of apoptotic process	45	4.46429	2.24977	8.1086e-07	NOTCH2, TOP2A, APP, STEAP3, BCL2A1, SRC, PDCD5, PSEN2, PTN, PTGS2, LRP6, PPP2CA, CALHM2, CASP12, BCL2L11, UBD, TP53INP1, HMOX1, CYP1B1, TSPO, BMF, PHLDA2, MAP3K5, BOK, PDGFRB, MOAP1, JUN, GADD45B, TNFRSF12A, TSC22D1, GADD45A, ZBTB16, RPS6, BMP7, NR4A1, ADCY10, BCL6, JMY, KCNMA1, ALDH1A1, LCN2, FAS, NOX4, IRF5, NUPR1
BP	GO:0001525	angiogenesis	30	2.97619	2.68938	2.41681e-06	CLIC4, RAMP2, NRP2, TSPAN12, PTGS2, MEOX2, FGF1, RTN4, S1PR1, HOXA3, HMOX1, CYP1B1, GLUL, PDGFRB, JUN, ANGPT2, COL27A1, ANXA2, IL15, EGF, EIF2AK3, WNT7A, PRKCA, ADRA2B, ARHGAP24, EMCN, ADAM15, OPTC, ADAM8, FGFR2
BP	GO:0048661	positive regulation of smooth muscle cell proliferation	17	1.68651	3.97262	4.59429e-06	PDGFRB, STAT5B, EGR1, JUN, ITGB3, PDGFB, PRKCA, HMGCR, PTGS2, EGFR, SMPD3, MYC, NAMPT, S1PR1, HMOX1, CDH13, FGFR2
BP	GO:2000379	positive regulation of reactive oxygen species metabolic process	11	1.09127	6.18314	6.62706e-06	PDGFRB, GADD45A, AKR1C1, DUOXA1, LCN2, PDGFB, AKR1C3, CYP1B1, NOX4, TSPO, ROMO1
BP	GO:0014070	response to organic cyclic compound	35	3.47222	2.24668	1.67837e-05	SLC22A6, TAT, PDGFB, PTGS2, HSD17B7, ACACB, AACS, EGFR, ACACA, CYP17A1, SOCS3, RELN, CCND1, NAMPT, ACP5, CYP1B1, JUNB, PDGFRB, ABCC3, JUN, CDKN2B, G6PD, ANGPT2, ABCC2, LUM, IGFBP2, PRKCA, CCNE1, CYP1A2, ALDH1A1, CYP1A1, FAS, ALPL, PLIN2, SLC22A8
BP	GO:0007623	circadian rhythm	20	1.98413	3.12749	1.99286e-05	KLF10, EGR1, NTRK2, JUN, BHLHE41, CREM, NR1D1, CYP7B1, EGFR, NPAS2, PER2, PER3, DBP, NFIL3, NOCT, NAMPT, BHLHE40, KCNMA1, CRY1, FAS
BP	GO:0042060	wound healing	21	2.08333	2.9117	3.39283e-05	NOTCH2, PDGFRB, JAG2, EGR1, PDGFRA, GSN, TPM1, PDGFB, WNT7A, NRG1, FGF1, PPL, EGFR, DCN, COL3A1, KLF6, LOX, FMOD, FGFR2, MAP3K5, PPARD
BP	GO:0031667	response to nutrient levels	24	2.38095	2.641	3.98913e-05	EGR1, ABCG8, ABCG5, SPINK1, SDS, IL15, SRC, GSTP1, GSS, SCTR, HMGCR, ACACB, SERPINA7, ADIPOR2, ACACA, CYP17A1, GSTA3, CBS, FASN, MAP1B, LCN2, FAS, OTC, FGF21
BP	GO:0070374	positive regulation of ERK1 and ERK2 cascade	28	2.77778	2.3769	5.22539e-05	NOTCH2, APP, LRP1, SRC, C5AR2, ITGB3, PDGFB, OLR35, HMGCR, FGF1, EGFR, C1QTNF3, GCNT2, CCL19, FGF21, PDGFRB, PDGFRA, JUN, CCL21, RGD1565355, EGF, NRG1, PRKCA, ESR1, TRPV4, NOX4, GAS6, FGFR2
BP	GO:0008210	estrogen metabolic process	9	0.892857	6.23935	6.25043e-05	PDGFRA, CYP3A9, SULT1E1, CYP2C11, CYP2D4, CYP1A2, CYP1A1, CYP1B1, RGD1559459
BP	GO:0030199	collagen fibril organization	12	1.19048	4.303	8.45907e-05	COL3A1, COL27A1, LOX, ANXA2, COL5A1, COL14A1, LUM, OPTC, LOXL4, CYP1B1, FMOD, ADAMTS7
BP	GO:0048545	response to steroid hormone	12	1.19048	4.15957	0.000116637	ABCA2, JUN, ABCC2, PAQR7, LOX, CCND1, CCNE1, IGFBP2, SPP1, CYP1B1, SERPINA7, CYP17A1
BP	GO:0045471	response to ethanol	26	2.57937	2.35106	0.000121945	GSTP1, HMGCR, ADIPOR2, CLDN1, AACS, ADH6, CYP3A9, RELN, CASP12, CCND1, MYC, EIF4EBP1, ACP5, EGR1, HSPA8, STAT5B, JUN, G6PD, SPINK1, GSN, PRKCA, CCNE1, ALDH1A1, FAS, HAMP, FGFR2
BP	GO:0034097	response to cytokine	16	1.5873	3.19967	0.000130111	PDGFRA, JUN, CDKN2B, PTGS2, CYP17A1, SOCS3, COL3A1, CCNE1, SLCO1B2, MAPKAPK2, ACP5, FAS, SKIL, JUNB, EPHA3, CFTR
BP	GO:0006695	cholesterol biosynthetic process	10	0.992063	4.95187	0.000139277	IDI1, G6PD, INSIG2, MSMO1, MVD, HMGCR, HSD17B7, LSS, ACAT2, CFTR
BP	GO:0018108	peptidyl-tyrosine phosphorylation	14	1.38889	3.50807	0.000155127	PDGFRB, PDGFRA, SPINK1, SRMS, EGF, SRC, PDGFB, EGFR, WEE1, EFEMP1, RELN, JAK3, EPHA3, FGFR2
BP	GO:2000573	positive regulation of DNA biosynthetic process	8	0.793651	6.39933	0.000169736	PDGFRB, SMOC2, EGF, SRC, MYC, PDGFB, CYP1B1, NOX4
BP	GO:0032922	circadian regulation of gene expression	13	1.28968	3.60496	0.000224175	EGR1, USP2, BHLHE41, CREM, NR1D1, NPAS2, CIART, PER2, PER3, NOCT, NAMPT, BHLHE40, CRY1
BP	GO:0042448	progesterone metabolic process	6	0.595238	9.599	0.000235542	STAT5B, AKR1C1, AKR1C3, AKR1C2, CYP46A1, CYP17A1
BP	GO:0014911	positive regulation of smooth muscle cell migration	10	0.992063	4.62174	0.000243248	PDGFRB, STAT5B, EGR1, SRC, MYC, ITGB3, SEMA6D, PDGFB, CYP1B1, NOX4
BP	GO:0032570	response to progesterone	12	1.19048	3.8396	0.000244783	GPI, SOCS3, HSPA8, RAMP2, RELN, CCNE1, ABHD2, TSPO, NRG1, DSG2, PTN, JUNB
BP	GO:0032496	response to lipopolysaccharide	29	2.87698	2.13123	0.00024667	CNP, CXCL1, PTGS2, LTC4S, ADIPOR2, CLDN1, SOCS3, SLCO1B2, NOCT, ACP5, LBP, ABCC3, STAT5B, JUN, ABCC2, IL10RA, FMO1, TNFRSF1B, KMO, DCN, NR4A1, CYP1A2, MAPKAPK2, LCN2, CYP1A1, FAS, ALPL, EPHA3, FGFR2
BP	GO:0001889	liver development	20	1.98413	2.58358	0.000271391	NOTCH2, STAT5B, JUN, CDKN2B, PTCD2, ONECUT2, PTN, CP, ACAT2, AACS, EGFR, DBP, CCND1, CCNE1, SLCO1B2, ALDH1A1, CYP1A1, RGN, LBP, OTC
BP	GO:0042752	regulation of circadian rhythm	12	1.19048	3.78143	0.000281181	PER2, KLF10, TOP2A, NOCT, BHLHE40, SRRD, CREM, CRY1, NR1D2, NR1D1, NPAS2, SPSB4
BP	GO:0046330	positive regulation of JNK cascade	15	1.4881	3.08879	0.000329275	APP, UNC5CL, GADD45B, CCL21, GADD45A, WNT7A, XIAP, TRAF1, TPD52L1, SH3RF1, MAPK8IP1, TRPV4, CCL19, MAP3K5, ANKRD6
BP	GO:0006631	fatty acid metabolic process	14	1.38889	3.23522	0.00035375	ASAH1, CREM, ACNAT2, ACNAT1, AACS, PER2, PLA2G15, AMACR, GPAT4, CYP1A1, CRYL1, HACL1, ACOT4, PPARD
BP	GO:0050680	negative regulation of epithelial cell proliferation	14	1.38889	3.19967	0.000394894	RB1, CDKN1C, CDKN2B, PTN, MCC, MTSS1, LRP6, RGN, TRIM24, NUPR1, LIMS2, FGFR2, PPARD, LIMS1
BP	GO:0048146	positive regulation of fibroblast proliferation	13	1.28968	3.33792	0.000466303	PDGFRB, PDGFRA, JUN, ANXA2, EGF, ITGB3, PDGFB, FBLN1, ESR1, EGFR, AGT, MYC, GAS6
BP	GO:0006082	organic acid metabolic process	10	0.992063	4.24446	0.00047485	CYP2J10, CYP2C12, CYP2U1, CYP2C11, CYP2T1, CYP2D4, CYP2F4, FMO1, CYP2C6V1, CYP17A1
BP	GO:0043627	response to estrogen	16	1.5873	2.84415	0.000482731	PDGFRB, PDGFRA, ABCC2, AKR1C1, IGFBP2, APOA2, PDGFB, WNT7A, ESR1, CYP3A9, KRT19, CCND1, KCNMA1, HMOX1, FAS, CFTR
BP	GO:0001822	kidney development	22	2.18254	2.33445	0.000500618	INVS, CDKN1C, PDGFRB, DYNC2H1, HSPA8, PTCD2, EGF, PRDM1, CYP4A2, PCSK5, BMP7, POU3F3, DCN, AGT, CYP26A1, BCL2L11, SALL1, ADAMTS1, ALDH1A1, RGN, RHPN1, FAT4
BP	GO:0070989	oxidative demethylation	6	0.595238	8.31914	0.000507122	CYP3A9, CYP2C11, CYP2D4, CYP1A2, TET3, CYP3A18
BP	GO:0030282	bone mineralization	11	1.09127	3.81294	0.000527145	SMPD3, KLF10, LOX, EIF2AK3, SPP1, ALPL, ROR2, PTN, PTGS2, MTSS1, FGFR2
BP	GO:1900020	positive regulation of protein kinase C activity	5	0.496032	11.5544	0.000548641	CEMIP, ROR2, DIPK2A, AGT, EGFR
BP	GO:0030335	positive regulation of cell migration	28	2.77778	2.0433	0.000619924	CEMIP, SEMA3C, ONECUT2, SYNPO2, ITGB3, PDGFB, ARHGAP5, PLD1, FGF1, CLDN1, EGFR, VSIR, S1PR1, GCNT2, ACP5, CPNE3, PDGFRB, PDGFRA, EGF, SEMA6D, PRKCA, SEMA4F, RHOC, TRIP6, MYADM, CDH13, ROR2, SMIM22
BP	GO:0071276	cellular response to cadmium ion	9	0.892857	4.56538	0.000638683	HSPA8, JUN, GSN, CYP1A2, ENPP2, AKR1C3, HMOX1, MT1, EGFR
BP	GO:0050919	negative chemotaxis	9	0.892857	4.56538	0.000638683	NRP2, SEMA3C, RTN4RL1, ITGB3, SEMA6D, SEMA4F, SLIT3, EFNA5, PLXNA3
BP	GO:0051897	positive regulation of protein kinase B signaling	17	1.68651	2.65837	0.000649741	CCL21, EGF, GDF15, SRC, ITSN1, AKR1C3, AKR1C2, NRG1, EGFR, RTN4, C1QTNF3, AXL, GCNT2, NOX4, ADAM8, CCL19, GAS6
BP	GO:0034614	cellular response to reactive oxygen species	10	0.992063	3.99958	0.000747656	SMPD3, PDGFRA, JUN, SRC, TPM1, MPV17L, PEX5, AKR1C3, ROMO1, EGFR
BP	GO:0008610	lipid biosynthetic process	7	0.694444	6.06604	0.000771467	ACLY, ACSS2, SCD, GPAT4, AGMO, FASN, ACACA
BP	GO:0098609	cell-cell adhesion	21	2.08333	2.31087	0.000788517	TENM2, CD93, SRC, LOC685767, CLDN2, EGFR, LRP6, PRTG, EMCN, VNN1, ADAM15, BOC, CDH13, DSG2, ADAM8, FAT4, NECTIN3, CD200, LIMS2, MPZL2, LIMS1
BP	GO:0009636	response to toxic substance	16	1.5873	2.70541	0.000821253	PDGFRB, CHKA, CNP, GSTP1, ARNT, PRKCA, CLDN1, CYP17A1, RELN, LCN2, CYP1A1, CYP2F4, FAS, CYP1B1, NUPR1, SLC22A8
BP	GO:0061098	positive regulation of protein tyrosine kinase activity	8	0.793651	4.89361	0.000992573	APP, RELN, EGF, TRPV4, PDGFB, NOX4, GAS6, AGT
BP	GO:0042572	retinol metabolic process	10	0.992063	3.7139	0.00129725	CES2C, CES2E, RETSAT, CYP2D4, CYP1A2, ALDH1A1, CYP1A1, CYP1B1, AKR1B8, ADH6
BP	GO:0010033	response to organic substance	20	1.98413	2.27299	0.00132188	ABCC3, STAT5B, PDGFRA, JUN, ASAH1, PDGFB, PTGS2, CYP17A1, SQLE, CCND1, CCNE1, CYP2D4, CYP1A2, CYP1A1, SPP1, CYP1B1, CDH13, MAPT, ATF3, PPARD
BP	GO:0006633	fatty acid biosynthetic process	9	0.892857	3.98256	0.0016303	ACLY, ACSM3, SCD, ELOVL5, FASN, SCD2, ACSM5, ACACB, ACACA
BP	GO:0038183	bile acid signaling pathway	6	0.595238	6.56774	0.00167288	ABCG8, ABCG5, ALDH1L1, ABCC2, HMGCR, ACAT2
BP	GO:0045087	innate immune response	36	3.57143	1.73717	0.00176137	C1QA, IGHM, APP, SRC, LRRK2, HMGB3, OAS1A, CGAS, INAVA, OASL, LGALS3, TIFA, LBP, JAK3, KLRG1, OASL2, TRIM43A, WFDC21, SRMS, LOC108349189, MX2, ISG15, PTK6, VNN1, ADAM15, IGH-6, NEURL3, LCN2, SARM1, PLIN3, TLR11, IRF5, ALPK1, SERINC5, TMEM106A
BP	GO:0043410	positive regulation of MAPK cascade	21	2.08333	2.16215	0.00178284	MAP2K3, APP, NTRK2, GPR37, GADD45B, EGF, GDF15, PRKCE, PDGFB, LPAR3, ADRA2B, EGFR, INAVA, AGT, KISS1, ADORA1, ROR2, JCAD, TMEM106A, FGFR2, MAP3K5
BP	GO:0045860	positive regulation of protein kinase activity	11	1.09127	3.26823	0.00180105	MAP2K3, DAB1, RELN, CCL21, MMD, LRRK2, NRG1, MMD2, CCL19, GAS6, MAP3K5
BP	GO:0045780	positive regulation of bone resorption	7	0.694444	5.19946	0.00183264	SRC, ITGB3, SPP1, ADAM8, PRKCA, EGFR, LRP6
BP	GO:0031670	cellular response to nutrient	5	0.496032	8.66577	0.00191956	CDKN2B, CCNE1, TNKS, HMOX1, ACAT2
BP	GO:0010041	response to iron(III) ion	4	0.396825	13.8652	0.00198013	G6PD, CASP12, IREB2, CYP1A1
BP	GO:0016098	monoterpenoid metabolic process	4	0.396825	13.8652	0.00198013	CYP2C11, CYP2D4, CYP1A2, CYP2C6V1
BP	GO:0046483	heterocycle metabolic process	4	0.396825	13.8652	0.00198013	CYP2D4, CYP1A2, CYP1A1, CYP2C6V1
BP	GO:0007411	axon guidance	20	1.98413	2.18925	0.0020457	NRP2, TENM2, UNC5A, SEMA3C, UNC5B, SEMA6D, SEMA4F, UNC5D, EFNA5, BMP7, PRTG, RELN, LHX2, RTN4RL1, BOC, KIF5A, SLIT3, CCDC141, EPHA3, PLXNA3
BP	GO:0010243	response to organonitrogen compound	11	1.09127	3.17745	0.00223361	ABCC3, BHMT, CASP12, NNMT, CCND1, CCNE1, UBD, APEX1, CCNG1, PTGS2, AACS
BP	GO:0007155	cell adhesion	32	3.1746	1.77949	0.00228639	LGALS3BP, APP, SRC, ITGB3, CLDN2, CLDN1, THBS4, PRTG, RELN, CLDN23, SPP1, CYP1B1, SVEP1, NCAM2, CCDC141, PCDH1, MPDZ, CGREF1, TNFRSF12A, RGD1565355, PRKCE, PRKCA, PARVB, GRHL2, CLDN6, BCAN, DAB1, COL5A1, CERCAM, CD9, DSG2, NECTIN3
BP	GO:0030198	extracellular matrix organization	19	1.88492	2.21999	0.00234256	APP, PDGFRA, COL27A1, FBLN1, AGT, LGALS3, SMOC2, COL3A1, COL4A2, SPINT1, ELF3, COL5A1, MMP15, ADAMTS1, COL4A1, SPOCK2, ADAMTSL2, COL9A3, ADAMTS7
BP	GO:0032148	activation of protein kinase B activity	7	0.694444	4.85283	0.0026616	NOTCH2, SRC, PDGFB, NRG1, FGF1, GAS6, ADRA2B
BP	GO:0042127	regulation of cell proliferation	21	2.08333	2.08973	0.00266281	JAG2, STAT5B, CXCL9, JUN, EGLN3, PDGFB, WNT7A, CELA1, PRDM1, PTGS2, EGFR, LRP6, SQLE, CXCL11, BCL6, FAS, JUNB, FGFR2, KCNH1, PPARD, SMIM22
BP	GO:0035556	intracellular signal transduction	35	3.47222	1.70874	0.00271979	NOTCH2, NIM1K, GUCY1B2, RGS14, CCDC68, SRC, LRRK2, ITSN1, PSEN2, HSPB1, EGFR, SOCS2, SOCS3, MCF2L, MKNK2, HMOX1, PLEK2, JAK3, MPDZ, PDGFRB, WSB1, CISH, EGF, PRKCE, STAC3, MOK, NRG1, PRKCA, MASTL, SMAD7, ADCY10, MAPKAPK2, ARHGEF3, SIK1, SPSB4
BP	GO:0008285	negative regulation of cell proliferation	37	3.67063	1.67651	0.00272234	RB1, IFITM3, APP, BTG3, PDCD5, TOB2, PTGS2, TP53INP1, ADORA1, TRIM24, HMOX1, CYP1B1, SLIT3, JUN, CDKN2B, AGTPBP1, ZBTB16, RARRES1, P3H2, PRKCA, ETV3, BMP7, ATG13, AGT, KISS1, CACNB4, BCL6, DDAH1, ADORA2B, CD9, NOX4, CDH13, TAX1BP3, ROR2, NUPR1, CD200, FGFR2
BP	GO:0042981	regulation of apoptotic process	19	1.88492	2.1712	0.00298361	EGR1, MOAP1, GLS2, CIDEA, XIAP, ESR1, AGT, ACER2, TOX3, POR, BCL2L11, CASP12, LOX, MYC, APEX1, TRIM24, SARM1, FAS, JAK3
BP	GO:0045944	positive regulation of transcription from RNA polymerase II promoter	84	8.33333	1.36593	0.00302626	RB1, TOP2A, APP, ZFP605, ONECUT2, MEOX2, FGF1, BACH1, ZNF48, PSMD9, SALL1, DBP, MYC, MCF2L, NAMPT, MYBL2, IKBKG, MYBL1, JUNB, JAK3, HTATIP2, SAMD11, KLF10, KLF12, ANXA2, TSC22D1, ZBTB38, ARNT, SOX12, POU3F1, DCN, POU3F3, ETV6, TOX3, LOC100360380, ELF3, MTF1, TET3, MTF2, IRF7, CDH13, IRF5, ATF3, ZFP770, PPARD, NOTCH2, TNKS, CREM, EGFR, NPAS2, LRP6, GALR3, ATXN7, EPCAM, HLTF, S1PR1, HSF4, E2F3, EGR…
BP	GO:0019373	epoxygenase P450 pathway	7	0.694444	4.69629	0.00316836	CYP2J10, CYP2C12, CYP2C11, CYP2T1, LOC100361547, CYP2F4, CYP2C6V1
BP	GO:0050730	regulation of peptidyl-tyrosine phosphorylation	7	0.694444	4.69629	0.00316836	PDGFRB, APP, EGF, PRKCE, PDGFB, PRKCA, EGFR
BP	GO:0055085	transmembrane transport	25	2.48016	1.90456	0.00322561	UST4R, OCA2, SLC46A1, SLC44A4, BCL2A1, SLC22A12, SLC25A48, SLC16A6, SLC25A25, SLC16A4, SLC19A2, SLC17A4, ABCC3, ABCA2, ABCG8, ABCG5, ABCC2, SVOP, SPNS3, LETM1, SLC6A6, GJB1, SLC22A8, CFTR, SLC25A13
BP	GO:0007167	enzyme linked receptor protein signaling pathway	4	0.396825	11.8845	0.0033417	LRP1, AXL, GAS6, JAK3
BP	GO:2000669	negative regulation of dendritic cell apoptotic process	4	0.396825	11.8845	0.0033417	CCL21, AXL, CCL19, GAS6
BP	GO:0010043	response to zinc ion	9	0.892857	3.53171	0.00356789	CYP3A9, P2RX5, SLC30A3, SLC30A2, IREB2, ACP5, MT1, HAMP, OTC
BP	GO:0000122	negative regulation of transcription from RNA polymerase II promoter	66	6.54762	1.42097	0.00376401	RB1, CDKN1C, APP, TENM2, PRDM6, BHLHE41, CHD3, PRDM1, BACH1, FOXQ1, SALL1, CCND1, MYC, SAMD11, KLF12, RGD1565355, TSC22D3, USP2, SOX12, ETV3, DUSP26, POU3F1, ZFP90, KLF16, FOXP2, POU3F3, TLE6, ETV6, CCNE1, MTF2, CRY1, SIK1, ATF3, PPARD, NOTCH2, CREM, PSEN2, PPP2CA, CUX2, PCBP3, NFIL3, HSF4, CRYM, SKIL, IRX1, EGR1, JUN, CBX3, GADD45A, ZBTB16, CELA1, NR1D2, NR1D1, ESR1, SMAD7, PER2, PER3, BCL6, BRM…
BP	GO:0007420	brain development	32	3.1746	1.70649	0.00427042	TOP2A, ITSN1, IREB2, PTN, EFNA5, HSD17B7, ACAT2, RTN4, NT5E, RELN, BCL2L11, SVBP, S1PR1, SLIT3, BOK, JAG2, PDGFRA, SCTR, NRG1, ATP2B2, SYNJ2, POU3F1, GRHL2, BCAN, DAB1, SBK1, LHX2, COL4A1, DMXL2, CCNG1, CD9, MAPT
BP	GO:0070301	cellular response to hydrogen peroxide	14	1.38889	2.46754	0.00437908	PDGFRB, HSPA8, SRC, XIAP, HSPB1, SMPD3, KLF6, CASP12, AXL, APEX1, LCN2, FAS, CYP1B1, MAP3K5
BP	GO:0006629	lipid metabolic process	17	1.68651	2.20977	0.0044441	SDS, ACSM3, GDPD1, CIDEA, SLC16A11, ACSM5, FMO5, ADIPOR2, ACACA, PLA2G15, ACLY, SULT1D1, FABP5, HACL1, THRSP, LPIN2, PPARD
BP	GO:0009615	response to virus	12	1.19048	2.71276	0.00454887	ISG20, IFITM3, SRC, MX2, LCN2, CYP1A1, HSPB1, OAS1A, ISG15, IFI27L2B, OASL2, OASL
BP	GO:0010595	positive regulation of endothelial cell migration	10	0.992063	3.10415	0.00458146	GPI, SMOC2, EGF, ADORA2B, ITGB3, LCN2, WNT7A, PRKCA, FGF1, AGT
BP	GO:0008284	positive regulation of cell proliferation	45	4.46429	1.53176	0.0049369	NOTCH2, PDGFB, HMGCR, PTN, PTGS2, FGF1, EGFR, LGALS3, EFEMP1, HMGN5, CCND1, EPCAM, MYC, ENPP2, S1PR1, GCNT2, HOXA3, HSF4, ROMO1, E2F3, TRPM4, FGF21, PDGFRB, NTRK2, STAT5B, PDGFRA, JUN, TSC22D1, ST8SIA1, IL15, EGF, RPS6, AKR1C3, AKR1C2, WNT7A, NRG1, PRLR, POU3F3, AGT, ACER2, ADORA2B, MVD, ATF3, FGFR2, PPARD
BP	GO:0071456	cellular response to hypoxia	19	1.88492	2.06889	0.004971	EGR1, JUN, EGLN3, SRC, PRKCE, IREB2, ITPR2, PTN, PTGS2, RTN4, CBS, MYC, EIF4EBP1, HMOX1, FAS, ADAM8, JUNB, FGFR2, PPARD
BP	GO:1990646	cellular response to prolactin	4	0.396825	10.3989	0.00515661	JUN, SRC, MYC, AKR1C3
BP	GO:0007565	female pregnancy	16	1.5873	2.23332	0.00542516	STAT5B, RAMP2, ABCC2, IGFBP2, AKR1C3, HSPB1, CP, ADRA2B, ADIPOR2, AGT, CYP3A9, SULT1E1, NAMPT, CYP2D4, MAPT, JUNB
BP	GO:0006468	protein phosphorylation	46	4.56349	1.51138	0.005722	INVS, APP, NIM1K, RAMP2, AMHR2, SRC, LRRK2, PDGFB, PKMYT1, AURKC, CCND1, MKNK2, TRIM24, MAP3K6, JAK3, MAP3K5, CDKL2, MAP2K3, PDGFRB, NEK8, NTRK2, PDGFRA, CDKL4, SRMS, LIMK2, PRKCE, EIF2AK3, MATK, MOK, PTK6, PRKCA, MASTL, ATG13, HIPK3, UHMK1, WEE1, SBK1, CCNE1, AXL, MAPKAPK2, TAF4B, SIK1, ROR2, ALPK1, GAS6, EPHA3
BP	GO:0050679	positive regulation of epithelial cell proliferation	12	1.19048	2.6271	0.0058059	SPINK1, ST8SIA1, EGF, MYC, C5AR2, FGF1, CYP7B1, ESR1, GLUL, FOXP2, EGFR, FGFR2
BP	GO:0006694	steroid biosynthetic process	7	0.694444	4.15957	0.00593513	HSD3B7, HSD3B3, CYP1A1, TSPO, HSD17B7, LSS, CYP17A1
BP	GO:0010634	positive regulation of epithelial cell migration	8	0.793651	3.61702	0.00599636	DOCK5, JUN, SRC, PRKCE, ENPP2, ARHGAP5, JAK3, RTN4
BP	GO:0010035	response to inorganic substance	8	0.793651	3.61702	0.00599636	PDGFRA, NT5E, CASP12, MAP1B, ADORA1, FAS, SLC1A3, LTC4S
BP	GO:0045071	negative regulation of viral genome replication	8	0.793651	3.61702	0.00599636	ISG20, IFITM3, FAM111A, MX2, OAS1A, ISG15, OASL2, OASL
BP	GO:0042178	xenobiotic catabolic process	6	0.595238	4.99148	0.00601999	CYP3A9, ABCC2, CYP2C11, CYP2D4, CYP1A2, CYP2C6V1
BP	GO:0032930	positive regulation of superoxide anion generation	6	0.595238	4.99148	0.00601999	APP, GSTP1, CXCL1, MAPT, AGT, EGFR
BP	GO:0009311	oligosaccharide metabolic process	5	0.496032	6.49932	0.00605326	ST8SIA1, ST8SIA3, ST6GALNAC3, ST6GALNAC4, FUT4
BP	GO:0008283	cell proliferation	29	2.87698	1.71834	0.00612561	RB1, NOTCH2, OCA2, LRP1, SRC, SLC20A1, MCM10, EGFR, CCND1, MYC, S1PR1, HOXA3, GLUL, STAT5B, JUN, ST8SIA1, EGF, ZBTB16, NRG1, PRKCA, GRHL2, BMP7, AGT, BCL6, CYP1A1, CD9, YME1L1, FGFR2, PPARD
BP	GO:0010942	positive regulation of cell death	10	0.992063	2.97112	0.0061355	ACER2, EGR1, BCL2L11, CASP12, LRP1, RGD1565355, AKR1C3, FAS, PTGS2, BMP7
BP	GO:0046777	protein autophosphorylation	19	1.88492	2.02646	0.00615	PDGFRB, PDGFRA, HSPA8, NTRK2, SRC, LRRK2, EIF2AK3, PTK6, PRKCA, AURKC, ATG13, EGFR, UHMK1, MKNK2, MAPKAPK2, TRIM24, SIK1, FGFR2, HTATIP2
BP	GO:0043406	positive regulation of MAP kinase activity	11	1.09127	2.75634	0.00632109	PDGFRB, APP, EGF, SRC, LRRK2, PDGFB, NOX4, ADAM8, TPD52L1, FGF1, EGFR
BP	GO:0000278	mitotic cell cycle	15	1.4881	2.26063	0.00662363	CENPT, STAT5B, APP, RGS14, RPS6, MASTL, GEM, PPP2CA, WEE1, TUBB2A, PPP2R2D, CDH13, MYBL2, MYBL1, LOC100360828
BP	GO:0071395	cellular response to jasmonic acid stimulus	3	0.297619	20.7978	0.00669258	AKR1C1, AKR1C3, AKR1C2
BP	GO:0007015	actin filament organization	17	1.68651	2.11715	0.00669336	TMOD1, GSN, ACTN1, TPM1, MYO7B, RHOF, RND2, RHOC, RND3, MTSS1, AKAP2, TLE6, RHOBTB1, STX1B, TRPV4, CORO6, CAP2
BP	GO:0007204	positive regulation of cytosolic calcium ion concentration	18	1.78571	2.05693	0.00679229	RIC3, PDGFRA, CD52, SPINK1, LRP1, RGD1565355, C5AR2, CIB2, CXCL1, ESR1, KNG1, AGT, LRP6, KISS1, GNAT2, TRPV4, JAK3, TRPM4
BP	GO:0006084	acetyl-CoA metabolic process	4	0.396825	9.24348	0.0074606	ACLY, FASN, ACACB, ACACA
BP	GO:2001046	positive regulation of integrin-mediated signaling pathway	4	0.396825	9.24348	0.0074606	CD63, PCSK5, LIMS2, LIMS1
BP	GO:0038007	netrin-activated signaling pathway	4	0.396825	9.24348	0.0074606	UNC5CL, UNC5A, UNC5B, UNC5D
BP	GO:1904373	response to kainic acid	4	0.396825	9.24348	0.0074606	CASP12, IREB2, LCN2, PTN
BP	GO:0006094	gluconeogenesis	8	0.793651	3.46631	0.00759444	PER2, GPI, SDS, GOT1, CRY1, ATF3, FBP2, SLC25A13
BP	GO:0071277	cellular response to calcium ion	12	1.19048	2.52095	0.00788971	PPP2CA, JUN, CLIC4, ADGRV1, SYT2, CPNE4, AKR1C3, SYT15, CPNE3, KRT10, JUNB, KCNH1
BP	GO:0007275	multicellular organism development	10	0.992063	2.84902	0.00806651	PDGFRB, PDGFRA, NTRK2, PTCD2, AXL, CDH13, ROR2, CDH17, EGFR, FGFR2
BP	GO:0014068	positive regulation of phosphatidylinositol 3-kinase signaling	11	1.09127	2.66019	0.00809516	PDGFRB, NTRK2, RELN, EGF, UNC5B, PDGFB, NRG1, ROR2, DCN, AGT, PPARD
BP	GO:0006693	prostaglandin metabolic process	6	0.595238	4.62174	0.00845112	GSTA3, AKR1C1, GSTP1, AKR1C3, AKR1C2, AKR1B7
BP	GO:0006637	acyl-CoA metabolic process	6	0.595238	4.62174	0.00845112	ACSM3, GPAT4, ACSM5, ACNAT2, ACNAT1, ACOT4
BP	GO:0030855	epithelial cell differentiation	13	1.28968	2.37168	0.00864496	CD63, AKR1C1, AKR1C2, KRT10, BMP7, LGALS3, KRT19, BDH2, ELF3, PTER, GSTA3, COL4A1, FGFR2
BP	GO:0045475	locomotor rhythm	5	0.496032	5.77718	0.00942939	EGR1, KCNMA1, USP2, NPAS2, CIART
BP	GO:0042574	retinal metabolic process	5	0.496032	5.77718	0.00942939	AKR1C1, AKR1C3, CYP1B1, BCO2, AKR1B8
BP	GO:0030593	neutrophil chemotaxis	10	0.992063	2.77305	0.00958976	LGALS3, CXCL11, CXCL9, CCL21, PDE4B, SPP1, PRKCA, CXCL1, LBP, CCL19
BP	GO:0043066	negative regulation of apoptotic process	44	4.36508	1.48075	0.00975269	LRP1, BCL2A1, SRC, PSEN2, XIAP, HSPB1, HMGCR, PTGS2, EGFR, SH3RF1, LGALS3, SOCS3, HMGN5, CBS, EPCAM, MYC, ADORA1, PDGFRB, STAT5B, JUN, TSC22D1, PRKCE, RPS6, EIF2AK3, WNT7A, PRLR, HIPK3, POU3F3, MAPK8IP1, POR, BCL6, AXL, IL2RB, CCNG1, RGN, FAS, YME1L1, NUPR1, GAS6, CRYAB, CARD14, LIMS2, PPARD, LIMS1
BP	GO:0006836	neurotransmitter transport	7	0.694444	3.73295	0.0101444	SLC6A6, SLC6A8, SLC6A9, SLC1A2, SLC29A4, SLC1A3, SLC28A2
BP	GO:0050996	positive regulation of lipid catabolic process	4	0.396825	8.31914	0.010281	PRKCE, APOA2, SCTR, ADORA1
BP	GO:0009404	toxin metabolic process	4	0.396825	8.31914	0.010281	CYP1A2, CYP1A1, CYP1B1, FMO1
BP	GO:0060087	relaxation of vascular smooth muscle	4	0.396825	8.31914	0.010281	ADORA2B, TRPV4, KCNMA1, ADORA1
BP	GO:0097421	liver regeneration	10	0.992063	2.70102	0.0113205	HSD3B7, CCND1, MYC, RGN, FAS, HMOX1, CLDN1, HAMP, EGFR, CFTR
BP	GO:0030325	adrenal gland development	7	0.694444	3.63962	0.0114619	PDGFRB, CDKN1C, PDGFRA, SALL1, CYP1B1, TSPO, CYP17A1
BP	GO:0007259	JAK-STAT cascade	7	0.694444	3.63962	0.0114619	SOCS2, SOCS3, STAT5B, DAB1, PRLR, HAMP, JAK3
BP	GO:0007494	midgut development	5	0.496032	5.47312	0.0114978	DAB1, RELN, ALDH1A1, EGFR, OTC
BP	GO:0021702	cerebellar Purkinje cell differentiation	5	0.496032	5.47312	0.0114978	TOP2A, AGTPBP1, CEND1, ATP2B2, FOXP2
BP	GO:0071287	cellular response to manganese ion	5	0.496032	5.47312	0.0114978	BACE1, APP, CASP12, LRRK2, IREB2
BP	GO:0060749	mammary gland alveolus development	5	0.496032	5.47312	0.0114978	SOCS2, CCND1, EGF, ESR1, PRLR
BP	GO:0043434	response to peptide hormone	14	1.38889	2.18925	0.0116966	STAT5B, PRKCA, PLD1, SERPINA7, BMP7, LRP6, SOCS2, SOCS3, SLCO1B2, TRIM24, FAS, PRSS8, JUNB, CFTR
BP	GO:0007163	establishment or maintenance of cell polarity	8	0.793651	3.19967	0.0117026	PARD6B, PARVB, RHOF, RND2, RHOC, RND3, RHOBTB1, LIMS1
BP	GO:1901216	positive regulation of neuron death	8	0.793651	3.19967	0.0117026	C1QA, EGR1, LCN2, ADORA1, SARM1, MAPT, KMO, MAP3K5
BP	GO:0009314	response to radiation	8	0.793651	3.19967	0.0117026	BACE1, APP, COL3A1, JUN, ANGPT2, MYC, ITGB3, PTGS2
BP	GO:0050731	positive regulation of peptidyl-tyrosine phosphorylation	13	1.28968	2.2531	0.0127349	PDGFRA, EGF, IL15, RGD1565355, SRC, ITGB3, PDGFB, NRG1, EFNA5, THBS4, AGT, RELN, ENPP2
BP	GO:0071363	cellular response to growth factor stimulus	12	1.19048	2.35447	0.012884	PDGFRB, PDGFRA, STAT5B, EGR1, ANGPT2, AMHR2, MAP1B, PDGFB, CPNE3, GAS6, TNFRSF1B, EGFR
BP	GO:0002376	immune system process	7	0.694444	3.55085	0.0128956	IGHM, IGH-6, IRF7, IRF5, AABR07060872.1
BP	GO:0006725	cellular aromatic compound metabolic process	3	0.297619	15.5984	0.0129592	SQLE, CYP1A2, CYP1B1
BP	GO:0032387	negative regulation of intracellular transport	3	0.297619	15.5984	0.0129592	MAP1B, MAPT, CRYAB
BP	GO:1990705	cholangiocyte proliferation	3	0.297619	15.5984	0.0129592	NOTCH2, LIMS2, LIMS1
BP	GO:0070232	regulation of T cell apoptotic process	3	0.297619	15.5984	0.0129592	LGALS3, JAK3, GIMAP8
BP	GO:0051726	regulation of cell cycle	24	2.38095	1.7212	0.0129984	RB1, NOTCH2, CDKL2, HSPA8, CGREF1, JUN, CDKL4, CDKN2B, GADD45B, GADD45A, MX2, JADE1, XIAP, JADE2, MASTL, UHMK1, PER2, CCND1, CCNE1, MYC, JMY, SKIL, JUNB, SMIM22
BP	GO:0043552	positive regulation of phosphatidylinositol 3-kinase activity	6	0.595238	4.15957	0.0132535	PDGFRB, PDGFRA, CCL21, SRC, PDGFB, CCL19
BP	GO:0043153	entrainment of circadian clock by photoperiod	6	0.595238	4.15957	0.0132535	PER2, PER3, BHLHE40, USP2, CRY1, SIK1
BP	GO:0044598	doxorubicin metabolic process	4	0.396825	7.56285	0.0136376	AKR1C1, AKR1C3, AKR1C2, AKR1B8
BP	GO:0032825	positive regulation of natural killer cell differentiation	4	0.396825	7.56285	0.0136376	STAT5B, IL15, AXL, GAS6
BP	GO:0060670	branching involved in labyrinthine layer morphogenesis	4	0.396825	7.56285	0.0136376	SOCS3, SPINT1, FGFR2, LLGL2
BP	GO:0044597	daunorubicin metabolic process	4	0.396825	7.56285	0.0136376	AKR1C1, AKR1C3, AKR1C2, AKR1B8
BP	GO:0030865	cortical cytoskeleton organization	5	0.496032	5.19946	0.0138364	RHOF, RND2, RHOC, RND3, RHOBTB1
BP	GO:0097192	extrinsic apoptotic signaling pathway in absence of ligand	7	0.694444	3.46631	0.0144504	MOAP1, BCL2L11, BCL2A1, MKNK2, LCN2, FAS, BOK
BP	GO:0051412	response to corticosterone	7	0.694444	3.46631	0.0144504	RELN, CCND1, CCNE1, HSD3B3, PRKCA, JUNB, SERPINA7
BP	GO:0036120	cellular response to platelet-derived growth factor stimulus	7	0.694444	3.46631	0.0144504	SRC, MYC, ITGB3, PRKCE, PDGFB, PTN, PCSK5
BP	GO:0048863	stem cell differentiation	9	0.892857	2.75266	0.0158883	EPCAM, MTF2, PRKCA, KRT10, ESR1, ELL3, VSIR, FGFR2, PHF19
BP	GO:0014912	negative regulation of smooth muscle cell migration	5	0.496032	4.95187	0.0164561	LRP1, SEMA6D, APEX1, ABHD2, PPARD
BP	GO:0008630	intrinsic apoptotic signaling pathway in response to DNA damage	8	0.793651	2.97112	0.0172153	MOAP1, BCL2L11, BCL2A1, MYC, HMOX1, TNFRSF1B, SKIL, BOK
BP	GO:0061844	antimicrobial humoral immune response mediated by antimicrobial peptide	11	1.09127	2.35852	0.0180086	APP, LGALS3, CXCL11, CXCL9, CCL21, CXCL1, ROMO1, CCL19, RPL39, CXCL14, HAMP
BP	GO:0043154	negative regulation of cysteine-type endopeptidase activity involved in apoptotic process	9	0.892857	2.67401	0.0186734	GPI, NR4A1, POR, SRC, XIAP, PTGS2, GAS6, CRYAB, SH3RF1
BP	GO:0043401	steroid hormone mediated signaling pathway	5	0.496032	4.72678	0.019366	PAQR7, OLR59, ABHD2, BMP7, ESR1
BP	GO:0051923	sulfation	5	0.496032	4.72678	0.019366	SULT1C2, SULT1D1, SULT1E1, RGD1559960, SULT4A1
BP	GO:1904754	positive regulation of vascular associated smooth muscle cell migration	6	0.595238	3.78143	0.0196204	DOCK5, LRP1, ADAMTS1, PDGFB, PCSK5, AGT
BP	GO:0016477	cell migration	24	2.38095	1.65281	0.0201638	PDGFRB, CD63, DOCK5, PDGFRA, OLR59, ONECUT2, ATRNL1, SRC, ITGB3, PDGFB, PTK6, NRG1, RHOF, ARHGAP5, RND2, RHOC, RND3, KNSTRN, RELN, COL5A1, AXL, S1PR1, CORO6, EPHA3
BP	GO:0031427	response to methotrexate	3	0.297619	12.4787	0.0209142	SLC22A6, ABCC2, SLC22A8
BP	GO:0051902	negative regulation of mitochondrial depolarization	3	0.297619	12.4787	0.0209142	GOT1, SRC, BOK
BP	GO:0035754	B cell chemotaxis	3	0.297619	12.4787	0.0209142	HSD3B7, CYP7B1, GAS6
BP	GO:1902632	positive regulation of membrane hyperpolarization	3	0.297619	12.4787	0.0209142	TRPV4, KCNMA1, AGT
BP	GO:0006569	tryptophan catabolic process	3	0.297619	12.4787	0.0209142	KYNU, KMO, ACMSD
BP	GO:0032956	regulation of actin cytoskeleton organization	11	1.09127	2.28776	0.0218303	PDGFRB, LRP1, ITGB3, RHOF, RND2, RHOC, EFNA5, RND3, EPHA3, RHOBTB1, SMIM22
BP	GO:0010811	positive regulation of cell-substrate adhesion	7	0.694444	3.16489	0.02197	SMOC2, SPOCK2, PRKCE, PDGFB, SPP1, PTN, LIMS1
BP	GO:0071356	cellular response to tumor necrosis factor	17	1.68651	1.85112	0.0219999	NTRK2, ASAH1, ABCC2, CCL21, LRRK2, NR1D1, TNFRSF1B, CLDN1, SMPD3, LCN2, FAS, CYP1B1, CCL19, HAMP, TNFRSF21, ADAMTS7, MAP3K5
BP	GO:0097503	sialylation	4	0.396825	6.39933	0.0220063	ST8SIA1, ST6GALNAC3, ST6GALNAC4, ST3GAL3
BP	GO:0034101	erythrocyte homeostasis	4	0.396825	6.39933	0.0220063	GPI, AXL, IREB2, HMOX1
BP	GO:0021795	cerebral cortex cell migration	4	0.396825	6.39933	0.0220063	DAB1, PEX5, EGFR, LRP6
BP	GO:1990874	vascular smooth muscle cell proliferation	4	0.396825	6.39933	0.0220063	PDGFB, NDRG2, PCSK5, AGT
BP	GO:0032720	negative regulation of tumor necrosis factor production	10	0.992063	2.41835	0.022104	CLEC4A3, AXL, C5AR2, GSTP1, CIDEA, ACP5, TSPO, LBP, GAS6, VSIR
BP	GO:0071372	cellular response to follicle-stimulating hormone stimulus	6	0.595238	3.67021	0.0221202	PPP2CA, EGR1, POR, AKR1C3, EFNA5, EPHA3
BP	GO:0001890	placenta development	8	0.793651	2.82005	0.0223998	NOTCH2, CDKN1C, RPS6, HSD17B2, PHLDA2, DCN, LLGL2, PPARD
BP	GO:0045666	positive regulation of neuron differentiation	12	1.19048	2.17021	0.0224479	SOCS2, APP, SALL1, DAB1, BCL6, MMD, MAP1B, DUOXA1, MMD2, BMP7, ADRA2B, TLE6
BP	GO:0009887	animal organ morphogenesis	13	1.28968	2.07978	0.0226419	NOTCH2, NEK8, PDGFRA, ATRNL1, FGF1, BMP7, FLI1, ASXL2, HOXA3, SLIT3, PHLDA2, FGFR2, FGF21
BP	GO:0007264	small GTPase mediated signal transduction	11	1.09127	2.26511	0.023226	DOCK5, DAB1, ARHGAP30, RASGEF1B, ITSN1, HMOX1, RHOF, RND2, RHOC, RND3, RHOBTB1
BP	GO:0007169	transmembrane receptor protein tyrosine kinase signaling pathway	12	1.19048	2.1515	0.0237652	PDGFRB, PDGFRA, NTRK2, SRMS, AXL, SRC, NRG1, PTK6, ROR2, EGFR, EPHA3, FGFR2
BP	GO:0007628	adult walking behavior	7	0.694444	3.09755	0.0241958	DAB1, AGTPBP1, CACNB4, KCNMA1, CEND1, MAPT, UCHL3
BP	GO:0007229	integrin-mediated signaling pathway	11	1.09127	2.2429	0.0246852	COL3A1, ADAM15, ADAMTS1, SRC, ITGB3, ADAM11, ISG15, PTN, CDH17, LIMS2, LIMS1
BP	GO:0019915	lipid storage	6	0.595238	3.56534	0.0248177	STAT5B, RGD1565355, CIDEA, CRY1, PLIN3, PLIN2
BP	GO:0043123	positive regulation of I-kappaB kinase/NF-kappaB signaling	17	1.68651	1.82249	0.0250158	UNC5CL, CCL21, SLC20A1, RGD1565355, PRKCE, RHOC, INAVA, LURAP1L, UBD, TIFA, HMOX1, PLIN3, IKBKG, CCL19, ALPK1, APOL3, TMEM106A
BP	GO:0050872	white fat cell differentiation	5	0.496032	4.33288	0.0260867	PER2, PDGFRA, SCD, PNPLA3, AACS
BP	GO:0071280	cellular response to copper ion	5	0.496032	4.33288	0.0260867	BACE1, APP, CYP1A2, CYP1A1, MT1
BP	GO:0010226	response to lithium ion	5	0.496032	4.33288	0.0260867	RELN, IMPA2, IGFBP2, PTGS2, GRIA3
BP	GO:0043280	positive regulation of cysteine-type endopeptidase activity involved in apoptotic process	8	0.793651	2.72759	0.0264013	PPP2CA, APP, BCL2L11, CASP12, MYC, PDCD5, FAS, MAP3K5
BP	GO:0006644	phospholipid metabolic process	7	0.694444	3.03302	0.0265675	PLPP4, PLPPR1, NAPEPLD, ENPP2, GDPD1, HMOX1, PLPP2
BP	GO:0070327	thyroid hormone transport	4	0.396825	5.94224	0.0270277	ABCC2, CRYM, SERPINA7, SLC17A4
BP	GO:0006536	glutamate metabolic process	4	0.396825	5.94224	0.0270277	GOT1, TAT, ALDH18A1, GLUL
BP	GO:1990776	response to angiotensin	4	0.396825	5.94224	0.0270277	COL3A1, ADORA2B, HSPB1, PTGS2
BP	GO:0030324	lung development	14	1.38889	1.95416	0.0274203	PDGFRA, ASAH1, PTN, FGF1, CP, FOXP2, EGFR, SMPD3, COL3A1, LOX, CYP1A2, EIF4EBP1, FGFR2, CFTR
BP	GO:0042246	tissue regeneration	6	0.595238	3.46631	0.0277175	NOTCH2, GSN, ADAM15, AXL, PTN, GAS6
BP	GO:0001501	skeletal system development	12	1.19048	2.09726	0.0280543	SMPD3, NOTCH2, JAG2, CDKN1C, BCAN, LGALS3, COL3A1, COL27A1, ZBTB16, WFIKKN2, EIF2AK3, ROR2
BP	GO:0050673	epithelial cell proliferation	10	0.992063	2.31087	0.0287167	RB1, ST8SIA1, EGF, FABP7, TRIM24, FGF1, CYP7B1, EGFR, FGFR2, PPARD
BP	GO:0006635	fatty acid beta-oxidation	7	0.694444	2.97112	0.0290882	BDH2, SESN2, PEX5, ECHDC1, ACOX3, ACAT2, PPARD
BP	GO:0043277	apoptotic cell clearance	5	0.496032	4.15957	0.029909	LRP1, RGD1565355, AXL, ITGB3, GAS6
BP	GO:0035106	operant conditioning	3	0.297619	10.3989	0.0303812	PDE8B, ALDH1A7, AGT
BP	GO:0036005	response to macrophage colony-stimulating factor	3	0.297619	10.3989	0.0303812	SPP1, ALPL, ACP5
BP	GO:0002407	dendritic cell chemotaxis	3	0.297619	10.3989	0.0303812	CCL21, CCL19, TRPM4
BP	GO:0044849	estrous cycle	6	0.595238	3.37262	0.0308237	HSPA8, EGR1, ALDH1A1, ENPP2, CYP1B1, PTN
BP	GO:0009612	response to mechanical stimulus	12	1.19048	2.0626	0.0312063	COL3A1, JUN, ANGPT2, RELN, SRC, MAP1B, IGFBP2, ACP5, PRKCA, PPL, JUNB, DCN
BP	GO:0010628	positive regulation of gene expression	41	4.06746	1.38878	0.0315081	APP, RAMP2, SRC, ITGB3, PDCD5, PDGFB, FBLN1, PRDM1, FGF1, VSIR, CYP3A9, HMGN5, CUX2, NFIL3, MYC, TP53INP1, TRIM24, IKBKG, LGALS5, FGF21, EGR1, HSPA8, NTRK2, STAT5B, GSN, EGF, EIF2AK3, WNT7A, NRG1, POU3F1, BMP7, POU3F3, AGT, TRPV4, LCN2, GAS6, CLEC4F, ATF3, FGFR2, PPARD, LIMS1
BP	GO:0008584	male gonad development	15	1.4881	1.85695	0.0319663	PDGFRB, JAG2, PDGFRA, AMHR2, PDGFB, AKR1C3, ESR1, CYP17A1, BCL2L11, ADAM15, CYP1B1, COL9A3, NUPR1, CSMD1, BOK
BP	GO:0032868	response to insulin	13	1.28968	1.97352	0.0323614	EGR1, JUN, INSIG2, VPS13C, RPS6, PDGFB, SOCS3, TRPV4, SESN2, CRY1, ACP5, ALPL, OTC
BP	GO:0007588	excretion	4	0.396825	5.54609	0.0326053	ABCG8, ABCG5, AGT, POU3F3
BP	GO:0009395	phospholipid catabolic process	4	0.396825	5.54609	0.0326053	APOA2, NAPEPLD, ENPP2, PLD1
BP	GO:0030900	forebrain development	11	1.09127	2.1381	0.0329793	DYNC2H1, APP, HSPA8, RELN, CNP, SRC, PSEN2, POU3F1, SSTR3, FOXP2, LRP6
BP	GO:0030216	keratinocyte differentiation	8	0.793651	2.59973	0.0332741	CERS3, UGCG, CLIC4, ASAH1, MAFB, AKR1C3, KRT10, POU3F1
BP	GO:0055010	ventricular cardiac muscle tissue morphogenesis	5	0.496032	3.99958	0.0340444	PTCD2, TNNC1, TPM1, FGFR2, SMAD7
BP	GO:2000463	positive regulation of excitatory postsynaptic potential	6	0.595238	3.28387	0.0341397	APP, STX1B, CUX2, RELN, WNT7A, GRIP2
BP	GO:0048008	platelet-derived growth factor receptor signaling pathway	6	0.595238	3.28387	0.0341397	SMPD3, PDGFRB, PDGFRA, RGS14, ITGB3, PDGFB
BP	GO:0043523	regulation of neuron apoptotic process	6	0.595238	3.28387	0.0341397	EGR1, G6PD, EGLN3, TRIM2, SARM1, ESR1
BP	GO:0045931	positive regulation of mitotic cell cycle	6	0.595238	3.28387	0.0341397	APP, SMOC2, STAT5B, USP2, EIF4EBP1, PRKCA
BP	GO:0021987	cerebral cortex development	12	1.19048	2.02906	0.0346026	NTRK2, COL3A1, TUBB2A, DAB1, RELN, BCL2A1, LRP1, LHX2, KIF5A, FAT4, FOXP2, LRP6
BP	GO:0030326	embryonic limb morphogenesis	8	0.793651	2.55973	0.0358065	NOTCH2, DYNC2H1, JAG2, ZBTB16, PSEN2, WNT7A, BMP7, LRP6
BP	GO:0007595	lactation	8	0.793651	2.55973	0.0358065	SOCS2, STAT5B, CCND1, GPAT4, EIF2AK3, ATP2B2, PRLR, CP
BP	GO:0045892	negative regulation of transcription, DNA-templated	41	4.06746	1.37313	0.036662	RB1, CDKN1C, SRC, PRDM6, CREM, BHLHE41, PDGFB, TOB2, CIART, SALL1, CUX2, NFIL3, TRIM24, HSF4, SAMD11, KLF10, TLE3, HSPA8, JUN, CBX3, ZBTB16, ZBTB38, NRG1, NR1D2, NR1D1, POU3F1, BMP7, PHC3, FOXP2, ZFP90, POU3F3, SMAD7, PER2, BCL6, ELF3, BHLHE40, CRY1, GAS6, CRYAB, ATF3, LIMS1
BP	GO:0045597	positive regulation of cell differentiation	7	0.694444	2.79971	0.0375741	SOCS3, SLC6A6, CCNE1, HSF4, PTN, JUNB, BMP7
BP	GO:0019369	arachidonic acid metabolic process	6	0.595238	3.19967	0.0376684	CYP2D4, CYP1A2, CYP4F4, CYP1B1, CYP2C6V1, CYP4A2
BP	GO:0051968	positive regulation of synaptic transmission, glutamatergic	6	0.595238	3.19967	0.0376684	NTRK2, RELN, ROR2, PTGS2, GLUL, EGFR
BP	GO:0046697	decidualization	6	0.595238	3.19967	0.0376684	KISS1, PTN, PTGS2, JUNB, ESR1, PPARD
BP	GO:0006979	response to oxidative stress	14	1.38889	1.86647	0.0377905	APP, BTG3, G6PD, ABCC2, RGS14, LRRK2, TAT, PTGS2, SOD3, EGFR, MTF1, ALDH1A1, LCN2, HMOX1
BP	GO:0001938	positive regulation of endothelial cell proliferation	9	0.892857	2.33976	0.0379311	NR4A1, JUN, EGF, ADORA2B, ITGB3, PDGFB, CDH13, PRKCA, THBS4
BP	GO:0031397	negative regulation of protein ubiquitination	8	0.793651	2.52095	0.0384629	PER2, NXN, SVBP, PRKCE, CRY1, TSPO, ISG15, SMAD7
BP	GO:0042311	vasodilation	8	0.793651	2.52095	0.0384629	ADORA2B, KCNMA1, ADORA1, AGT, KNG1, EGFR, CFTR, PPARD
BP	GO:0006970	response to osmotic stress	5	0.496032	3.85145	0.0384955	TRPV4, TSC22D3, KCNMA1, FMO1, EGFR
BP	GO:0048771	tissue remodeling	4	0.396825	5.19946	0.0387328	AXL, CELA1, GAS6, THBS4
BP	GO:0022407	regulation of cell-cell adhesion	4	0.396825	5.19946	0.0387328	SRC, ADAM8, EFNA5, ZDHHC2
BP	GO:0006954	inflammatory response	26	2.57937	1.51046	0.0394208	CXCL9, C5AR2, CXCL1, PTGS2, KNG1, FUT4, SPP1, CCL19, MAP2K3, NTRK2, ABCC2, CCL21, IL15, CELA1, IL17RE, TNFRSF1B, CXCL11, VNN1, ELF3, AXL, FASN, MAPKAPK2, PLIN3, TLR11, ADAM8, HAMP
BP	GO:0030154	cell differentiation	36	3.57143	1.39948	0.0401966	RB1, NOTCH2, SRC, HSD17B7, FGF1, NDRG2, CHRDL1, EGFR, FOXQ1, SOCS3, UGCG, NKX1-2, SPP1, JUNB, SKIL, JAK3, FGF21, JAG2, SRMS, SYT2, ARNT, PTK6, NRG1, NR1D2, SOX12, NR1D1, ETV3, ARHGAP24, FLI1, ETV6, SMAD7, ELF3, AXL, SARM1, ROR2, PPARD
BP	GO:1905691	lipid particle disassembly	3	0.297619	8.91336	0.041197	CHKA, PLIN3, PLIN2
BP	GO:1902949	positive regulation of tau-protein kinase activity	3	0.297619	8.91336	0.041197	APP, EGR1, NAB2
BP	GO:0031346	positive regulation of cell projection organization	3	0.297619	8.91336	0.041197	EFEMP1, LCN2, PLEK2
BP	GO:0001561	fatty acid alpha-oxidation	3	0.297619	8.91336	0.041197	PHYH, HACL1, HAO2
BP	GO:0000082	G1/S transition of mitotic cell cycle	8	0.793651	2.48332	0.0412452	RB1, HSPA8, CCND1, CCNE1, MYC, RPS6, EIF4EBP1, E2F3
BP	GO:0043029	T cell homeostasis	6	0.595238	3.11968	0.0414122	PPP2CA, STAT5B, BCL2L11, RC3H1, FAS, JAK3
BP	GO:0009791	post-embryonic development	11	1.09127	2.04264	0.0430529	INVS, BCL2L11, SEMA3C, CYP1A2, IREB2, CELA1, PRDM1, SERPINA7, FOXP2, FGFR2, LLGL2
BP	GO:0010575	positive regulation of vascular endothelial growth factor production	5	0.496032	3.7139	0.043263	ADORA2B, EIF2AK3, CYP1B1, ARNT, PTGS2
BP	GO:0043524	negative regulation of neuron apoptotic process	17	1.68651	1.69982	0.0433064	GPI, NTRK2, JUN, LRP1, UNC5B, ITSN1, XIAP, MT1, ESR1, AGT, FOXQ1, TOX3, CCND1, AXL, HMOX1, ADAM8, BOK
BP	GO:0022008	neurogenesis	10	0.992063	2.14411	0.0434139	LHX2, FABP7, PRDM6, SPOCK1, NRG1, PHGDH, FAT4, VXN, EGFR, ETV6
BP	GO:0043525	positive regulation of neuron apoptotic process	10	0.992063	2.14411	0.0434139	BACE1, APP, EGR1, JUN, BCL2L11, KCNMA1, LCN2, FAS, MYBL2, NUPR1
BP	GO:0071560	cellular response to transforming growth factor beta stimulus	11	1.09127	2.02457	0.0452934	CDKN2B, COL4A2, SRC, PDCD5, AKR1C3, WNT7A, NOX4, CLDN1, FGFR2, LIMS1, SMAD7
BP	GO:0071361	cellular response to ethanol	6	0.595238	3.04359	0.0453728	PPP2CA, PRKCE, RPS6, TP53INP1, KIF5A, ITPR2
BP	GO:0009750	response to fructose	4	0.396825	4.89361	0.0454	LCN2, PTGS2, SLC2A5, ADIPOR2
BP	GO:0060253	negative regulation of glial cell proliferation	4	0.396825	4.89361	0.0454	RB1, CDKN2B, TSPO, PTN
BP	GO:0010917	negative regulation of mitochondrial membrane potential	4	0.396825	4.89361	0.0454	ADCY10, HEBP2, PRKCE, MAPT
BP	GO:0045893	positive regulation of transcription, DNA-templated	47	4.6627	1.31738	0.0464995	CDKN1C, SRC, JADE1, PDGFB, EGFR, NPAS2, LRP6, PSMD9, SALL1, NFIL3, MYC, TP53INP1, SPP1, TRIM24, E2F3, MAP3K5, LOC100361636, MAP2K3, EGR1, JUN, EGF, ZBTB16, ACTN1, ARNT, WNT7A, NR1D2, NR1D1, POU3F1, GRHL2, BMP7, ESR1, ZFP90, FLI1, POU3F3, AGT, PER2, TOX3, NR4A1, MAFB, LHX2, MTF1, JMY, RFXAP, IRF7, ROR2, NUPR1, PPARD
BP	GO:0050728	negative regulation of inflammatory response	13	1.28968	1.86463	0.0467612	RB1, IL10RA, ARNT, NR1D2, NR1D1, TNFRSF1B, SOCS3, C1QTNF3, NT5E, ADORA1, ACP5, HAMP, PPARD
BP	GO:1904646	cellular response to beta-amyloid	7	0.694444	2.647	0.0474942	BACE1, APP, BCL2L11, LRP1, RGD1565355, NAMPT, LCN2
BP	GO:0030155	regulation of cell adhesion	7	0.694444	2.647	0.0474942	JAG2, STAT5B, EMCN, GSN, S1PR1, CYTIP, PRLR
BP	GO:0045429	positive regulation of nitric oxide biosynthetic process	7	0.694444	2.647	0.0474942	SMPD3, APP, DDAH1, RGD1565355, PTGS2, ESR1, AGT
BP	GO:0014823	response to activity	11	1.09127	2.00681	0.0476116	HSPA8, ANGPT2, COL4A2, ITGB3, IREB2, CRY1, PTN, SLC25A25, RTN4, PPARD, FGF21
BP	GO:0071347	cellular response to interleukin-1	11	1.09127	2.00681	0.0476116	SMPD3, PDGFRA, ABCC2, CCL21, MYC, LCN2, FAS, NR1D1, CCL19, KMO, ADAMTS7
BP	GO:0043010	camera-type eye development	9	0.892857	2.22834	0.0484068	CDKN1C, EFEMP1, CYP1A1, HSF4, B9D1, CRYAB, GRHL2, SLC25A25, FOXP2
BP	GO:0030308	negative regulation of cell growth	12	1.19048	1.9198	0.0485264	RB1, TCHP, CGREF1, ADAM15, BCL6, SESN2, SLIT3, ADIPOR2, CRYAB, AGT, RTN4, PPARD
BP	GO:0009416	response to light stimulus	6	0.595238	2.97112	0.0495515	NTRK2, BHLHE40, SLC1A2, CRY1, SLC1A3, JUNB
BP	GO:0048662	negative regulation of smooth muscle cell proliferation	6	0.595238	2.97112	0.0495515	IL15, HMOX1, NDRG2, ESR1, AGT, PPARD

## Sheet: CC (Old vs Young)
Category	ID	Term	Count	%	Fold Enrichment	pvalue	Genes
CC	GO:0005737	cytoplasm	354	35.119	1.31807	5.33684e-10	IFITM3, APP, SLC46A1, CCNJ, ITSN1, CLDN1, PTPDC1, PSMD9, LGALS3, PPP2R1B, MYC, PPP4R4, CYP2D4, NAMPT, TRIM24, CPNE3, TRMT44, GLUL, HERC6, DYNC2H1, WSB1, SDS, PRKCE, ARRDC2, ACTN1, ARRDC3, MYO7B, RC3H1, PRKCA, KNSTRN, UHMK1, SYTL2, MAPK8IP1, EML5, STX1B, CYP2U1, AKR1C15, SIK1, CFTR, LLGL2, BEX3, PARPBP, PDGFB, DCUN1D2, LPAR3, PLA2G7, PPL, ACMSD, PCBP3, CYP2T1, CYP2C6V1, CDR2, STAT5B, EGR1, SRMS, T…
CC	GO:0016020	membrane	228	22.619	1.3461	7.13915e-07	APP, ADAMDEC1, LDLRAD3, ZDHHC2, CYP1B1, PRKCE, ENTPD7, PRKCA, TMEM170B, SYTL2, MAPK8IP1, BCAN, STX1B, POR, PLPP4, YME1L1, RT1-BA, PLPP2, CFTR, UST4R, PDGFB, CEND1, PPL, UGCG, CYP2T1, AGMO, HMOX1, CYP2C6V1, PLEK2, TRPM4, ST3GAL3, JAG2, ABCA2, TMEM86B, ST8SIA1, ST8SIA3, CYP4F4, IFI47, RMDN2, SQLE, CYP26A1, NOX4, SLC22A8, CD200, NRP2, CLIC4, SLC44A4, C2CD2, PCSK6, PCSK5, PCSK4, VSIG10, SMPD3, SLC22A…
CC	GO:0009986	cell surface	66	6.54762	1.89354	9.49873e-07	IFITM3, APP, CLIC4, ITGB3, PCSK6, LGALS3, LBP, KCNH1, ADAMTS7, PDGFRB, PDGFRA, GPR37, ABCC2, ADGRV1, ANXA2, CD93, TNFRSF12A, IL15, SEMA6D, UNC5D, PRLR, ADRA2B, IL17RB, BACE1, BCAN, ADAM15, ADORA2B, RTN4RL1, ADAM8, ROR2, CDH17, CRYAB, CFTR, NOTCH2, CD63, RAMP2, CD5L, SLC1A2, PDGFB, PSEN2, SLC1A3, PTN, TSPAN33, EGFR, FUT4, LRP6, NT5E, DPP6, EPCAM, PROM1, KCNJ3, HSPA8, NTRK2, CD163, RT1-DMA, WNT7A, …
CC	GO:0005789	endoplasmic reticulum membrane	70	6.94444	1.72406	1.13686e-05	MSMO1, CYP4A2, CYP46A1, ZDHHC2, CYP3A18, JPH3, DUOXA1, CYP2D4, SCD2, CYP1B1, TMED5, BOK, CERS3, GPR37, CERS6, ELOVL5, NCBP2, VPS13C, PLA2G4C, CYP7B1, LSS, MAPK8IP1, POR, CYP4F39, CYP2U1, KCNMA1, RGD1309362, HPD, PLPP2, CFTR, OCA2, RETSAT, INSIG2, GDPD1, PSEN2, ITPR2, HMGCR, PLD1, LTC4S, PTGS2, HSD17B7, RTN4, CYP17A1, GULO, CYP3A9, EXTL1, CYP2C12, CYP2C11, AGMO, HSD17B2, HMOX1, CYP2F4, METTL7B, CY…
CC	GO:0043231	intracellular membrane-bounded organelle	79	7.8373	1.54156	0.000129427	DENND1B, LRRK2, LOC100361547, MPV17L, LECT2, CYP4A2, CES2C, CASP12, CES2E, CYP2D4, TSPO, CYP1B1, GLUL, AASS, KCNH1, ANKRD6, PDGFRB, G6PD, AGTPBP1, LIPO1, SLC30A2, PRKCE, P3H2, ETV3, LSS, ADRA2B, IL17RB, UHMK1, RNF144A, PLA2G15, CYP2J10, POR, RNF125, PPP1R3C, CYP2U1, DSG2, TAX1BP3, LLGL2, CD63, SYNPO2, HMGCR, PLD1, LTC4S, CYP17A1, BCL2L11, CYP2C12, CYP2C11, CYP2T1, HSD17B2, S1PR1, RGD1559459, CYP2…
CC	GO:0016324	apical plasma membrane	39	3.86905	1.91665	0.000167673	SLC46A1, SLC44A4, ITGB3, PSEN2, PLD1, SLC2A5, CLDN1, EGFR, SLC22A12, PARD6B, ADGRG2, EPCAM, PROM1, MPDZ, SLC17A4, PDGFRB, ABCG8, ABCG5, ABCC2, RGD1565355, IL10RA, ANXA13, IGFBP2, NRG1, ATP2B2, KISS1, SLC6A6, ADCY10, SLC6A8, SLC6A9, TRPV4, KCNMA1, FAS, CD9, NOX4, SLC29A4, DSG2, SLC22A8, CFTR
CC	GO:0005615	extracellular space	109	10.8135	1.39827	0.000293228	APP, LOXL4, FGF1, CXCL14, LGALS3, PODNL1, EFEMP1, NAMPT, ENPP2, SVEP1, FAM3C, PRSS8, RPL39, AABR07060872.1, WFDC21, SPINK1, COL27A1, SEMA6D, IGFBP2, KMO, PLA2G15, PROCR, BCAN, LOX, COL4A2, ADAM15, COL4A1, PLA1A, CFD, CNP, RT1-M2, PDGFB, FBLN1, PLA2G7, KNG1, APON, LOC259244, PROM1, FGF21, LOC298111, RARRES1, CELA1, BMP7, INHBC, CP, CXCL11, COL5A1, LCN2, ALPL, COL9A3, HAMP, LGALS3BP, GPI, CXCL9, CO…
CC	GO:0045177	apical part of cell	18	1.78571	2.71029	0.000344184	SPECC1, IFITM3, DYNC2H1, APP, ABCG5, CLIC4, LRP1, RGD1565355, C5AR2, PRKCA, NRG1, ADCY10, PARD6B, DAB1, SVBP, SPP1, FAT4, MPDZ
CC	GO:0030424	axon	42	4.16667	1.77627	0.000446883	PYGB, APP, NRP2, LRRK2, IREB2, SLC1A2, ITPR2, HSPB1, LPAR3, RTN4, CYP17A1, RELN, MYC, BOC, KIF5A, NCAM2, KCNH1, PRPH, PPFIA2, HSPA8, NTRK2, PDGFRA, SYT2, AGTPBP1, NRG1, PRKCA, TNFRSF1B, PRSS12, MAPK8IP1, UHMK1, BACE1, STX1B, BCAN, ADCY10, MAP1B, ALDH1A1, SARM1, MAPT, CRYAB, NECTIN3, TNFRSF21, CD200
CC	GO:0042995	cell projection	21	2.08333	2.40996	0.000465015	TENM2, ANGPT2, CNP, ACTN1, ITSN1, SLC1A3, NRG1, RHOF, RND2, RHOC, RND3, ARHGAP24, RTN4, RHOBTB1, CYP17A1, RTN4RL1, FABP7, PITPNM3, SPP1, PROM1, GLUL
CC	GO:0048471	perinuclear region of cytoplasm	58	5.75397	1.59919	0.000486193	IFITM3, APP, CLIC4, SH3RF1, MYC, KIF5A, PDE4B, CALN1, KCNH1, ADGRV1, ANXA2, PRKCE, USP2, RPS6, MMD2, PRKCA, TNFRSF1B, MAPK8IP1, PROCR, MAP1B, KCNMA1, CDH13, NHLRC1, RAB38, NUPR1, JCAD, CNP, SRC, GDPD1, PSEN2, SEZ6, XIAP, PTN, PLD1, NDRG2, EGFR, NOCT, SPP1, HMOX1, PDLIM4, JAG2, HSPA8, NTRK2, GSN, LIMK2, EIF2AK3, SYNJ2, SEPTIN9, TPD52L1, ESR1, PER2, ADCY10, DAB1, APEX1, CCNG1, NOX4, FAS, LIMS1
CC	GO:0005811	lipid particle	15	1.4881	2.89508	0.000648369	HSD3B7, ANXA2, CHKA, VPS13C, PLA2G4C, CIDEA, LSS, GIMAP7, PISD, SCCPDH, PNPLA3, PLIN3, PNPLA5, METTL7B, PLIN2
CC	GO:0043235	receptor complex	23	2.28175	2.12306	0.00130411	NOTCH2, PDGFRB, APP, PDGFRA, ABCG8, NTRK2, ABCG5, RAMP2, GPR37, ADGRV1, LRP1, AMHR2, RGD1565355, ITGB3, LOXL4, ITPR2, PRLR, EGFR, AXL, SLITRK5, ROR2, EPHA3, FGFR2
CC	GO:0005887	integral component of plasma membrane	69	6.84524	1.45617	0.00173287	TENM2, AMHR2, SLC2A5, TSPAN12, ZDHHC2, CLDN1, BOC, SLC16A6, SLC16A4, KCNH1, PDGFRB, ABCC3, PDGFRA, ABCG8, ABCG5, ABCC2, SEMA6D, ATP11C, NRG1, SSTR3, ADRA2B, BACE1, MMP15, TLR11, ADAM8, ROR2, PLPP2, EPHA3, CFTR, TNFRSF21, NOTCH2, CD63, SLC22A6, PLPPR1, LRP1, SEMA3C, SLC20A1, SLC1A2, PSEN2, SLC1A3, ATP10A, TSPAN33, EGFR, CALHM2, ADGRG2, GALR3, SLCO1B2, TAS1R1, PCDH1, PROM1, RHBG, TRPM4, PLXNA3, SLC…
CC	GO:0005604	basement membrane	14	1.38889	2.56231	0.00317695	ANXA2, ATRNL1, P3H2, FBLN1, PTN, EFNA5, THBS4, SMOC2, EFEMP1, COL4A2, COL5A1, ADAMTS1, COL4A1, COL9A3
CC	GO:0031012	extracellular matrix	25	2.48016	1.88884	0.0036527	NOTCH2, FBLN1, FGF1, THBS4, LGALS3, RELN, ADAMTS1, ADAMTSL2, SVEP1, ADAMTS7, COL27A1, LUM, WNT7A, DCN, BCAN, SMOC2, COL3A1, COL4A2, LOX, COL5A1, MMP15, COL4A1, OPTC, ALPL, COL9A3
CC	GO:0005783	endoplasmic reticulum	73	7.24206	1.39248	0.00378211	IFITM3, APP, CLIC4, TENM2, LRRK2, ARHGAP5, ZDHHC2, GIMAP8, CES2C, JPH3, CASP12, CES2E, DUOXA1, RESP18, SCD2, ADORA1, TSPO, TMED5, BOK, CERS3, GPR37, CERS6, ELOVL5, PRKCE, RPS6, P3H2, ATP11C, PRKCA, GRIP2, BACE1, CYP2J10, KCNMA1, NHLRC1, ZP2, HPD, PLPP2, CEMIP, INSIG2, YTHDC2, ZDHHC23, GDPD1, PSEN2, SEZ6, ITPR2, OAS1A, ATP10A, HMGCR, PTN, LTC4S, PTGS2, HSD17B7, THBS4, RTN4, CYP17A1, GPAT4, AGMO, H…
CC	GO:0005829	cytosol	215	21.3294	1.17735	0.00478139	LGALS3, PPP4R4, BBX, CPNE3, CEP97, GLUL, LGALS5, HERC6, SDS, PRKCE, ACTN1, P3H2, PRKCA, ATG13, CLPX, MAPK8IP1, POR, PPP1R3C, AKR1C15, MAP1B, SIK1, ALPK1, EPHA3, CFTR, LLGL2, BEX3, ADH6, ACMSD, HMOX1, TRPM4, STAT5B, JUN, CHKA, EIF2AK3, MICAL3, PTK6, RMDN2, PARVB, FLI1, ELL3, PARP11, BHMT, HAL, FASN, TRIP6, ECHDC1, DENND1B, GPI, CLIC4, ARHGAP5, AKR1B8, SH3RF1, AACS, AKR1B7, GLT1D1, CASP12, TSPO, AN…
CC	GO:0031226	intrinsic component of plasma membrane	7	0.694444	4.24612	0.00537563	PDGFRB, CD63, PDGFRA, UNC5A, S1PR1, ADIPOR2, TNFRSF21
CC	GO:0045121	membrane raft	26	2.57937	1.76922	0.00686633	APP, LRRK2, RGS16, PSEN2, SLC1A2, EGFR, GNAI1, PPP2CA, PPP2R1B, S1PR1, PRSS8, HSPA8, UNC5A, ANXA2, RGD1565355, UNC5B, ANXA13, ATP2B2, PRKCA, SYNJ2, TNFRSF1B, BACE1, RTN4RL1, MYADM, FAS, MAPT
CC	GO:0090575	RNA polymerase II transcription factor complex	14	1.38889	2.3221	0.00731913	JUN, ANXA2, CBX3, ARNT, BACH1, DBP, MAFB, NFIL3, RFXAP, HLTF, MAFF, E2F3, JUNB, ATF3
CC	GO:0005739	mitochondrion	88	8.73016	1.31016	0.00741172	MT-ND6, APP, CLIC4, ACSM3, LRRK2, TAT, MPV17L, MRPL36, GIMAP8, AKR1B8, DHTKD1, AKR1B7, TCHP, HEBP2, SLC25A48, ABHD10, HMGN5, MYC, KYNU, CHCHD6, CYP2D4, SESN2, ME1, TSPO, CYP1B1, CPNE3, SULT4A1, GLUL, AASS, BOK, PHYH, AGTPBP1, SDS, PRKCE, PRKCA, KMO, ATG13, CLPX, PISD, FAM210B, POR, ARMCX1, IVD, SDHAF1, PEX5, CRY1, CMPK2, SLC25A51, YME1L1, RAB38, CRYAB, SLC25A13, OAT, GLS2, SRC, GSTP1, IREB2, OAS1…
CC	GO:0043025	neuronal cell body	46	4.56349	1.48873	0.00744776	LRP1, SRC, LRRK2, ITSN1, IREB2, PSEN2, PDGFB, SEZ6, SLC1A3, RTN4, LRP6, CYP17A1, DPP6, RELN, BOC, ENC1, KIF5A, ADORA1, GRIA3, TRPM4, KCNH1, PRPH, HSPA8, NTRK2, RIC3, ELOVL5, ATP2B2, PRKCA, NR1D1, TNFRSF1B, GRIP2, MAPK8IP1, BACE1, KISS1, SLC6A6, ADCY10, DAB1, FABP7, MAP1B, KCNMA1, CCNG1, FAS, ROR2, MAPT, CD200, CFTR
CC	GO:0016323	basolateral plasma membrane	24	2.38095	1.80686	0.00772046	ABCC3, SLC46A1, SLC22A6, ANXA2, LRP1, LRRK2, ANXA13, PDGFB, SLC1A3, LIN7A, ATP2B2, CLDN1, EGFR, SLC6A6, SLC6A9, EPCAM, SLCO1B2, ADORA1, SLC29A4, SLC22A8, SLC13A5, RHBG, CDH17, CFTR
CC	GO:0043197	dendritic spine	19	1.88492	1.93933	0.00956991	APP, HSPA8, NTRK2, TENM2, RGS14, ACTN1, ITSN1, SLC1A2, SEZ6, SLC1A3, NR1D1, GRIP2, MAP1B, ADORA1, PDE4B, CRYAB, PDLIM4, GRIA3, PPFIA2
CC	GO:0016605	PML body	11	1.09127	2.56634	0.0103835	RB1, ISG20, TENM2, RGS14, ZBTB16, MKNK2, TP53INP1, TOPBP1, CHD3, SKIL, HIPK3
CC	GO:0005764	lysosome	26	2.57937	1.70896	0.0104089	CD63, APP, ASAH1, SRC, LRRK2, CTSW, GLB1L2, SULT1C2, ACP5, SLC17A4, ABCA2, HSPA8, RT1-DMA, GOT1, VPS13C, RT1-DOB, ARRDC3, MT1, BACE1, PLA2G15, SIDT1, RT1-BA, DNASE2, RAB38, RAB7B, CRYAB
CC	GO:0005794	Golgi apparatus	69	6.84524	1.33416	0.0121124	APP, TENM2, CHPF, LRRK2, TENT4A, GIMAP7, ZDHHC2, CXCL14, PCSK5, GIMAP8, SH3RF1, CEP128, SMPD3, RESP18, ENPP2, FAM3C, TGM4, TMED5, BOK, PDGFRB, DYNC2H1, PDGFRA, RGD1565355, MMD, PRKCE, SEMA6D, ENTPD7, P3H2, DUSP26, UHMK1, RNF144A, BACE1, ELF3, PEX5, KIFC3, KIF20A, ST6GALNAC3, RAB7B, CRYAB, ST6GALNAC4, HPD, GALT, LRP1, TNKS, ZDHHC23, PSEN2, CABP2, PLD1, NDRG2, PKMYT1, LRP6, EXTL1, SPP1, GCNT2, TRPM…
CC	GO:0005938	cell cortex	17	1.68651	1.94043	0.0147842	ANXA2, PLA2G4C, USP2, PSEN2, ITPR2, TBCB, RHOF, RND2, FGF1, RHOC, RND3, TLE6, GNAI1, RHOBTB1, PARD6B, CYTIP, FGFR2
CC	GO:0005581	collagen trimer	8	0.793651	3.03294	0.0155407	C1QA, COL3A1, COL27A1, COL4A2, LOX, COL5A1, COL14A1, COL4A1
CC	GO:0031410	cytoplasmic vesicle	28	2.77778	1.598	0.0174338	IFITM3, APP, DENND1B, STXBP4, LRRK2, RND2, RND3, RHOBTB1, LRP6, ALS2CL, ADAMTS1, TP53INP1, FAM3C, MPDZ, PDGFRB, ABCA2, FER1L5, SLC30A3, CD93, SLC30A2, ARRDC2, IGFBP2, RHOF, RHOC, PRSS12, BACE1, TRPV4, JMY
CC	GO:0030673	axolemma	5	0.496032	4.82514	0.0180891	ADORA1, SLC1A2, NRG1, MAPT, KCNH1
CC	GO:0043204	perikaryon	18	1.78571	1.83726	0.0193689	APP, HSPA8, NTRK2, LRRK2, HSPB1, SEMA4F, PCSK5, ESR1, RELN, RTN4RL1, MAP1B, RESP18, KIF5A, CRYAB, GLUL, GRIA3, KCNH1, PRPH
CC	GO:0031902	late endosome membrane	12	1.19048	2.21537	0.0196302	IFITM3, CD63, MREG, ANXA2, RT1-DMA, SLC30A3, MMD, RT1-DOB, RT1-BA, ANXA8, VPS37B, PLD1
CC	GO:0071944	cell periphery	11	1.09127	2.24554	0.0245746	SMOC2, KRT19, FABP7, PRKCE, PDE4B, RHPN1, NOX4, SLC1A3, CIB2, EFNA5, FUT4
CC	GO:0005777	peroxisome	13	1.28968	2.04443	0.0255599	IDI1, PHYH, MPV17L, ACNAT2, ACNAT1, ACAT2, AMACR, PEX5, HACL1, MVD, ACOX3, HAO2, ACOT4
CC	GO:0045098	type III intermediate filament	3	0.297619	10.6153	0.029233	VMAC, UPP2, PRPH
CC	GO:0045202	synapse	48	4.7619	1.35335	0.0296681	C1QA, APP, TENM2, PARPBP, LRRK2, ITGB3, ITSN1, SLC1A2, HSPB1, SLC1A3, LIN7A, ASAP2, PLD1, CHRDL1, EGFR, ELAVL2, LRP6, PPP2CA, ARHGAP42, PPP2R1B, ADORA1, SLITRK5, MPDZ, KCNH1, PPFIA2, NTRK2, RIC3, GPR37, ADGRV1, PRKCE, STAC3, NRG1, SEMA4F, PRSS12, IGFN1, MAPK8IP1, BCAN, SLC6A8, CACNB4, FABP5, ADORA2B, MAP1B, ALDH1A1, SARM1, CDH13, CRYAB, NECTIN3, SNTB1
CC	GO:0005576	extracellular region	60	5.95238	1.29851	0.0308947	INVS, COL14A1, WFIKKN2, LOXL4, FGF1, CHRDL1, RGD1309808, SMPD3, C1QTNF3, LGALS3, ADAMTS1, ADAMTSL2, ENPP2, FAM3C, TGM4, ADAMTS7, WFDC21, LAG3, ANXA2, IGFBP2, MUP5, NRG1, DCN, BCAN, MMRN1, COL4A2, LOX, COL4A1, CEACAM4, MAPT, GAS6, DIPK2A, ZP2, CRYAB, NOTCH2, CD63, C1QA, RUP2, PDGFB, PTN, KNG1, THBS4, SVBP, SPOCK2, THEM6, APOL3, ST3GAL3, CGREF1, GSN, GDF15, PBSN, ISG15, PRSS36, CP, ADCY10, LCN2, FA…
CC	GO:0005901	caveola	10	0.992063	2.25857	0.0327397	SLC22A6, RGD1565355, SRC, KCNMA1, HMOX1, CDH13, PTGS2, EFNA5, PLPP2, LRP6
CC	GO:0031594	neuromuscular junction	11	1.09127	2.08515	0.0383077	APP, STX1B, NTRK2, SYT2, PRKCE, PSEN2, SPOCK1, CIB2, NRG1, PTN, THBS4
CC	GO:0043195	terminal bouton	12	1.19048	1.99037	0.0390797	PPP2CA, APP, HSPA8, NTRK2, SYT2, KCNMA1, ITSN1, ADORA1, PRSS12, ESR1, GRIA3, PRPH
CC	GO:0005856	cytoskeleton	29	2.87698	1.44189	0.0485698	LRP1, SRC, CCDC146, RND2, PPL, RND3, RHOBTB1, SVBP, PDLIM4, JAK3, TMOD1, GSN, PRKCE, ACTN1, TPM1, MICAL3, PARVB, RHOF, KRT10, FRMD4B, RHOC, ARHGAP24, GRIP2, STX1B, EML5, KRT19, MAP1B, TRIP6, SNTB1
CC	GO:0098839	postsynaptic density membrane	11	1.09127	1.99604	0.0491702	GRID1, HSPB1, SEMA4F, NRG1, ATP2B2, LIN7A, LRRC4C, NECTIN3, RTN4, GRIA3, KCNH1

## Sheet: MF (Old vs Young)
Category	ID	Term	Count	%	Fold Enrichment	pvalue	Genes
MF	GO:0004497	monooxygenase activity	20	1.98413	4.93756	1.31032e-08	CYP4F4, MICAL3, FMO1, CYP4A2, KMO, CYP7B1, FMO5, CYP17A1, CYP26A1, CYP3A9, CYP4F39, CYP2C12, CYP2U1, CYP2C11, CYP2D4, CYP1A2, CYP1A1, CYP2F4, CYP1B1, CYP2C6V1
MF	GO:0005506	iron ion binding	29	2.87698	3.19891	1.01171e-07	MSMO1, CYP4A2, CYP46A1, CYP3A18, CYP17A1, CYP3A9, CYP2C12, CYP2C11, CYP2T1, AGMO, CYP2D4, AOX3, SCD2, CYP1B1, CYP2F4, CYP2C6V1, EGLN3, P3H2, CYP4F4, CYP7B1, CYP2J10, CYP26A1, CYP4F39, CYP2U1, SCD, CYP1A2, LCN2, CYP1A1, HPD
MF	GO:0020037	heme binding	28	2.77778	3.15575	2.32193e-07	GUCY1B2, SRC, LOC100361547, CYP4A2, PTGS2, CYP46A1, CYP3A18, CYP17A1, CYP3A9, HEBP2, CYP2C12, CYP2C11, CYP2T1, CBS, CYP2D4, HMOX1, CYP1B1, CYP2F4, CYP2C6V1, CYP4F4, NR1D1, CYP7B1, CYP2J10, CYP26A1, CYP4F39, CYP2U1, CYP1A2, CYP1A1
MF	GO:0016712	oxidoreductase activity, acting on paired donors, with incorporation or reduction of molecular oxygen, reduced flavin or flavoprotein as one donor, and incorporation of one atom of oxygen	14	1.38889	5.92507	3.58681e-07	LOC100361547, CYP3A18, CYP2J10, CYP3A9, CYP2C12, CYP2U1, CYP2C11, CYP2T1, CYP2D4, CYP1A2, CYP1A1, CYP2F4, CYP1B1, CYP2C6V1
MF	GO:0016491	oxidoreductase activity	27	2.67857	3.16339	3.79132e-07	MSMO1, AKR1B7, ADH6, GULO, CYP3A9, CYP2C11, AGMO, CYP2D4, AOX3, CYP1B1, DHRS7L1, CYP2C6V1, HAO2, AASS, AKR1C3, AKR1C2, CP, CYP26A1, POR, BDH2, SCCPDH, SCD, APEX1, FASN, CYP1A2, CYP1A1, NOX4
MF	GO:0008395	steroid hydroxylase activity	13	1.28968	5.2861	4.03e-06	CYP7B1, CYP46A1, CYP3A18, CYP2J10, CYP3A9, CYP2C12, CYP2U1, CYP2C11, CYP2T1, CYP2D4, CYP1A1, CYP2F4, CYP2C6V1
MF	GO:0042803	protein homodimerization activity	63	6.25	1.7703	1.40049e-05	TOP2A, APP, TENM2, AMHR2, LRRK2, BHLHE41, HSPB1, CGAS, CIB2, GIMAP7, ZDHHC2, IMPA2, KYNU, AOX3, IKBKG, MAP3K5, BOK, PDGFRA, G6PD, SDS, TNNC1, ZBTB38, ACTN1, TPM1, APOA2, ARNT, KNSTRN, FOXP2, POU3F3, TOX3, CDH13, MVD, CRYAB, HPD, ATF3, BCL2A1, PDGFB, PTGS2, RTN4, LRP6, TYMP, SRM, CBS, HMOX1, CRYM, PDLIM4, STAT5B, NTRK2, JUN, CHKA, GDF15, GADD45A, ZBTB16, GSS, CIDEA, TPD52L1, BHLHE40, CRYL1, THRSP,…
MF	GO:0016705	oxidoreductase activity, acting on paired donors, with incorporation or reduction of molecular oxygen	13	1.28968	4.56934	1.99294e-05	EGLN3, P3H2, CYP4F4, CYP4A2, CYP7B1, CYP17A1, CYP26A1, CYP4F39, CYP2C12, CYP2U1, CYP2C11, CYP1B1, CYP2C6V1
MF	GO:0042802	identical protein binding	128	12.6984	1.4015	6.37086e-05	RB1, APP, STEAP3, PRDM6, NAB2, CLDN2, CLDN1, GIMAP7, NAMPT, GLUL, MAP3K5, KCNH1, G6PD, HGD, SLC30A2, TPM1, USP2, FOXP2, LZTFL1, MAPK8IP1, PLPP4, CERCAM, ATF3, KCTD15, BEX3, SLC22A6, PDGFB, FBLN1, ADIPOR2, ACACB, ACACA, HMOX1, HACL1, CD300LF, SKIL, HAO2, TRPM4, STAT5B, JUN, TMEM86B, CHKA, CBX3, ZBTB16, ST8SIA3, EIF2AK3, PTK6, ESR1, NR4A1, BHMT, GJB1, MAFB, HOOK2, BCL6, TRPV4, FASN, LCN2, NAPEPLD, …
MF	GO:0048407	platelet-derived growth factor binding	6	0.595238	11.3115	9.28196e-05	PDGFRB, PDGFRA, COL3A1, COL5A1, COL4A1, PDGFB
MF	GO:0004712	protein serine/threonine/tyrosine kinase activity	30	2.97619	1.96256	0.000730168	SRC, LRRK2, AURKC, EGFR, MKNK2, MAP3K6, JAK3, MAP3K5, CDKL2, PDGFRB, NEK8, NTRK2, PDGFRA, SRMS, LIMK2, PRKCE, EIF2AK3, MATK, PTK6, PRKCA, MASTL, HIPK3, UHMK1, WEE1, SBK1, AXL, MAPKAPK2, SIK1, EPHA3, FGFR2
MF	GO:0070330	aromatase activity	9	0.892857	4.44381	0.000769101	CYP3A9, CYP2C12, CYP2C11, CYP2D4, CYP1A2, CYP1A1, CYP1B1, CYP2C6V1, CYP3A18
MF	GO:0005178	integrin binding	18	1.78571	2.52216	0.000782435	APP, SRC, ACTN1, ITGB3, CIB2, ISG15, PRKCA, NRG1, FBLN1, PTN, FGF1, THBS4, EGFR, COL3A1, ADAM15, SPP1, CD9, CDH17
MF	GO:0005509	calcium ion binding	53	5.25794	1.56122	0.00144323	TENM2, CETN3, ITSN1, CIB2, EFEMP1, ENPP2, SVEP1, ANXA8, CALN1, ADGRV1, ANXA2, CD93, TNNC1, ACTN1, ANXA13, PLA2G4C, BCAN, MMRN1, PITPNM3, RGN, CDH13, ADAM8, DSG2, MCTP2, GAS6, CDH17, SLC25A13, NOTCH2, CLEC4A3, LRP1, CABP2, ITPR2, FBLN1, PKD1L2, THBS4, SPOCK2, SPOCK1, SLIT3, PCDH1, SLC25A25, TRPM4, JAG2, CGREF1, GSN, SYT2, EGF, SYT15, ATP2B2, MCC, CABCOCO1, SMOC2, ALPL, FAT4
MF	GO:0004032	alditol:NADP+ 1-oxidoreductase activity	6	0.595238	6.54877	0.00169281	AKR1C15, AKR1C1, AKR1C3, AKR1C2, AKR1B8, AKR1B7
MF	GO:0101020	estrogen 16-alpha-hydroxylase activity	4	0.396825	13.8252	0.00199582	CYP3A9, CYP1A2, CYP1A1, CYP1B1
MF	GO:0005042	netrin receptor activity	4	0.396825	13.8252	0.00199582	UNC5CL, UNC5A, UNC5B, UNC5D
MF	GO:1990837	sequence-specific double-stranded DNA binding	42	4.16667	1.61893	0.00256502	ONECUT2, CREM, BHLHE41, PRDM1, MEOX2, NPAS2, FOXQ1, CUX2, DBP, HSF4, BBX, MYBL2, E2F3, JUNB, KLF10, IRX1, EGR1, JUN, KLF12, IRX5, ARNT, NR1D2, SOX12, NR1D1, ETV3, POU3F1, ESR1, FLI1, KLF16, NR4A1, KLF6, MAFB, BCL6, ELF3, TEF, MTF1, BHLHE40, MAFF, IRF7, IRF5, ATF3, PPARD
MF	GO:0001227	transcriptional repressor activity, RNA polymerase II transcription regulatory region sequence-specific binding	28	2.77778	1.84336	0.00278297	CREM, BHLHE41, PRDM1, BACH1, FOXQ1, SALL1, CUX2, PCBP3, NFIL3, MYC, HSF4, SKIL, IRX1, JUN, KLF12, ZBTB16, NR1D2, NR1D1, ETV3, POU3F1, FOXP2, ZFP90, KLF16, ETV6, BCL6, BHLHE40, ATF3, PPARD
MF	GO:0008405	arachidonic acid 11,12-epoxygenase activity	4	0.396825	11.8501	0.00336787	CYP2J10, CYP2C11, CYP2C6V1, CYP4A2
MF	GO:0019899	enzyme binding	36	3.57143	1.65902	0.00369998	RB1, NOTCH2, TOP2A, APP, SRC, ITGB3, MCM10, PTGS2, TSPAN33, EGFR, VSIR, PPP2CA, CCND1, CBS, DUOXA1, HMOX1, CYP2C6V1, MARCHF6, PDGFRB, HSPA8, JUN, CBX3, PRKCE, EIF2AK3, APOA2, PRKCA, ESR1, UHMK1, BACE1, POR, PPP1R3C, CYP1A2, PEX5, CYP1A1, MAPT, CFTR
MF	GO:0047834	D-threo-aldose 1-dehydrogenase activity	6	0.595238	5.40985	0.00417519	AKR1C15, AKR1C1, AKR1C3, AKR1C2, AKR1B8, AKR1B7
MF	GO:0000978	RNA polymerase II core promoter proximal region sequence-specific DNA binding	70	6.94444	1.38913	0.00470083	APP, ZFP605, ONECUT2, BHLHE41, PRDM1, MEOX2, BACH1, ZNF48, FOXQ1, SALL1, DBP, MYC, HOXA3, NKX1-2, MYBL2, MYBL1, JUNB, SAMD11, KLF10, KLF12, TSC22D1, ZBTB38, ARNT, SOX12, POU3F1, KLF16, FOXP2, POU3F3, ETV6, LOC100360380, ELF3, MTF1, IRF7, ZFP7, IRF5, ATF3, ZFP770, PPARD, CREM, NPAS2, CIART, CUX2, NFIL3, HSF4, ZFP184, E2F3, ZFP260, SKIL, ZFP583, IRX1, EGR1, STAT5B, JUN, IRX5, ZBTB16, NR1D2, NR1D1, …
MF	GO:0001786	phosphatidylserine binding	10	0.992063	3.04967	0.00514644	SMPD3, HSPA8, SYT2, ANXA2, AXL, ANXA13, SYT15, GAS6, CD300LF, SYTL2
MF	GO:0004713	protein tyrosine kinase activity	12	1.19048	2.61951	0.00591598	PDGFRB, NTRK2, WEE1, SRMS, CHKA, AXL, SRC, MATK, PTK6, JAK3, HIPK3, EGFR
MF	GO:0005504	fatty acid binding	8	0.793651	3.60657	0.00608183	FABP5, GSTA3, RGD1565355, FABP7, GSTP1, CYP4A2, ACOX3, PPARD
MF	GO:0018636	phenanthrene 9,10-monooxygenase activity	3	0.297619	20.7378	0.00672915	AKR1C1, AKR1C3, AKR1C2
MF	GO:0004062	aryl sulfotransferase activity	4	0.396825	9.21678	0.00751762	SULT1C2, SULT1D1, SULT1E1, RGD1559960
MF	GO:0030371	translation repressor activity	5	0.496032	6.09934	0.00769163	IFRD2, TRIM2, IREB2, EIF4EBP1, NHLRC1
MF	GO:0008514	organic anion transmembrane transporter activity	6	0.595238	4.44381	0.009999	SLC22A6, ABCC2, SLCO1B2, SLC1A2, SLC1A3, SLC22A8
MF	GO:0001758	retinal dehydrogenase activity	4	0.396825	8.2951	0.0103586	AKR1C1, ALDH1A1, AKR1C3, AKR1B8
MF	GO:0005044	scavenger receptor activity	8	0.793651	3.25298	0.0106978	LGALS3BP, CD163, RGD1565355, CD5L, ENPP2, LOXL4, SCARF2, PRSS12
MF	GO:0004714	transmembrane receptor protein tyrosine kinase activity	8	0.793651	3.25298	0.0106978	PDGFRB, PDGFRA, NTRK2, AXL, ROR2, EGFR, EPHA3, FGFR2
MF	GO:0008392	arachidonic acid epoxygenase activity	6	0.595238	4.29057	0.0116138	CYP2C12, CYP2C11, CYP2T1, LOC100361547, CYP2F4, CYP2C6V1
MF	GO:0008083	growth factor activity	15	1.4881	2.1018	0.0121975	JAG2, GPI, EGF, GDF15, PDGFB, NRG1, CXCL1, PTN, FGF1, INHBC, BMP7, THBS4, EFEMP1, GAS6, FGF21
MF	GO:0003700	transcription factor activity, sequence-specific DNA binding	36	3.57143	1.52359	0.0130776	ONECUT2, CREM, PRDM1, MEOX2, BACH1, FOXQ1, DBP, NFIL3, MYC, HOXA3, HSF4, E2F3, JUNB, EGR1, STAT5B, JUN, KLF12, ZBTB16, ZBTB38, ARNT, NR1D2, NR1D1, POU3F1, GRHL2, ESR1, FOXP2, KLF16, POU3F3, ETV6, KLF6, BCL6, ELF3, TEF, MTF1, ATF3, PPARD
MF	GO:0047086	ketosteroid monooxygenase activity	4	0.396825	7.541	0.0137393	AKR1C15, AKR1C1, AKR1C3, AKR1C2
MF	GO:0008391	arachidonic acid monooxygenase activity	4	0.396825	7.541	0.0137393	CYP2D4, CYP1A1, CYP4F4, CYP4A2
MF	GO:0032052	bile acid binding	4	0.396825	7.541	0.0137393	AKR1C1, NAPEPLD, AKR1C3, AKR1C2
MF	GO:0030296	protein tyrosine kinase activator activity	5	0.496032	5.18444	0.0139642	CHKA, RGD1565355, NRG1, GAS6, EGFR
MF	GO:0001228	transcriptional activator activity, RNA polymerase II transcription regulatory region sequence-specific binding	37	3.67063	1.5045	0.0144271	ZFP605, ONECUT2, MEOX2, BACH1, ZNF48, DBP, MYC, HSF4, MYBL2, E2F3, JUNB, MYBL1, SAMD11, KLF10, EGR1, STAT5B, JUN, TSC22D1, ZBTB16, SOX12, GRHL2, ESR1, FLI1, ETV6, NR4A1, KLF6, LOC100360380, MAFB, ELF3, TEF, LHX2, MTF1, RFXAP, MAFF, IRF5, ATF3, ZFP770
MF	GO:0030170	pyridoxal phosphate binding	8	0.793651	3.07226	0.0144619	PYGB, SDS, OAT, GOT1, PSAT1, CBS, KYNU, TAT
MF	GO:0005544	calcium-dependent phospholipid binding	8	0.793651	3.07226	0.0144619	SYT2, ANXA2, CPNE4, ANXA13, PLA2G4C, SYT15, CPNE3, ANXA8
MF	GO:0071949	FAD binding	7	0.694444	3.29919	0.0181565	GULO, SQLE, AOX3, MICAL3, CRY1, ACOX3, KMO
MF	GO:0046872	metal ion binding	113	11.2103	1.21607	0.0194459	STEAP3, GUCY1B2, ZFP605, AMHR2, ACSM3, JADE1, ACSM5, JADE2, PRDM1, ENPP2, TRIM24, TRMT44, PDE8B, TGM4, SAMD11, ABCG8, ABCG5, COL27A1, HGD, SLC30A3, SLC30A2, ZBTB38, PRKCE, USP2, PRLR, FOXP2, ACLY, LOC100360380, ADAM15, YME1L1, NHLRC1, ZFP7, HPD, BEX3, IDI1, IREB2, SLC1A2, SLC1A3, ACACB, RTN4, ACACA, HMOX1, ZFP184, ZFP583, NEK8, MICAL3, CELA1, MT1, ESR1, SMAD7, LHX2, TRPV4, TRIP6, PHF19, TOP2A, NR…
MF	GO:0036094	small molecule binding	9	0.892857	2.62873	0.0204769	LOX, FASN, PBSN, LCN2, SPP1, MUP4, MUP5, LOC259244, LOC298111
MF	GO:0015501	glutamate:sodium symporter activity	3	0.297619	12.4427	0.0210248	SLC1A2, SLC1A3, SLC1A7
MF	GO:0044877	macromolecular complex binding	45	4.46429	1.397	0.0220958	CDKN1C, CD63, CLIC4, ALDH1L1, LRP1, BCL2A1, SRC, CIB2, FBLN1, LTC4S, EGFR, AKAP2, RTN4, PPP2CA, SALL1, CCND1, EPCAM, MYC, SESN2, KIF5A, ADORA1, IKBKG, SKIL, KCNH1, PRPH, PPFIA2, BOK, PDGFRA, JUN, ARNT, ESR1, LZTFL1, BHMT, KRT19, MAFB, TEF, CCNE1, APEX1, MAP1B, KCNMA1, FAS, RT1-BA, MAPT, CRYAB, LIMS1
MF	GO:0016504	peptidase activator activity	4	0.396825	6.38085	0.0221663	APP, SVBP, FBLN1, CLPX
MF	GO:0031406	carboxylic acid binding	4	0.396825	6.38085	0.0221663	PHYH, GOT1, AKR1C1, AKR1C2
MF	GO:0030020	extracellular matrix structural constituent conferring tensile strength	6	0.595238	3.65961	0.0223513	COL3A1, COL27A1, COL4A2, COL5A1, COL4A1, COL9A3
MF	GO:0042562	hormone binding	5	0.496032	4.50821	0.0227761	AMHR2, ABHD2, CRYM, ESR1, SERPINA7
MF	GO:0050661	NADP binding	7	0.694444	3.02426	0.0268755	POR, G6PD, ME1, FMO1, HMGCR, CRYM, FMO5
MF	GO:0008195	phosphatidate phosphatase activity	4	0.396825	5.92507	0.0272217	PLPP4, PLPPR1, PLPP2, LPIN2
MF	GO:0005313	L-glutamate transmembrane transporter activity	4	0.396825	5.92507	0.0272217	SLC1A2, SLC1A3, SLC1A7, SLC25A13
MF	GO:0038085	vascular endothelial growth factor binding	3	0.297619	10.3689	0.0305393	PDGFRB, PDGFRA, PTN
MF	GO:0005102	receptor binding	28	2.77778	1.52005	0.0307887	APP, BEX3, TENM2, LRP1, SRC, LRRK2, RT1-M2, PDGFB, EGFR, LRP6, LBP, BOK, PDGFRB, HSPA8, ANGPT2, SRMS, PRKCE, RT1-N3, APOA2, WNT7A, PTK6, NRG1, SSTR3, MTSS1, STX1B, AMACR, GAS6, HAMP
MF	GO:0008009	chemokine activity	6	0.595238	3.36288	0.0311368	CXCL11, CXCL9, CCL21, CXCL1, CCL19, CXCL14
MF	GO:0004303	estradiol 17-beta-dehydrogenase activity	4	0.396825	5.53007	0.0328364	AKR1C1, HSD17B2, HSD17B7, AKR1B8
MF	GO:0000287	magnesium ion binding	19	1.88492	1.67667	0.0355689	TOP2A, NIM1K, IDI1, LRRK2, GSS, CIB2, ATP11C, ATP10A, GEM, GNAI1, NT5C3B, ADCY10, WEE1, ME1, SIK1, HACL1, MAP3K6, GLUL, MAP3K5
MF	GO:0005550	pheromone binding	4	0.396825	5.18444	0.0390036	MUP4, MUP5, LOC259244, LOC298111
MF	GO:0016229	steroid dehydrogenase activity	4	0.396825	5.18444	0.0390036	AKR1C15, AKR1C1, AKR1C3, AKR1C2
MF	GO:0043426	MRF binding	3	0.297619	8.88761	0.0414078	TSC22D3, BHLHE40, BHLHE41
MF	GO:0043878	glyceraldehyde-3-phosphate dehydrogenase (NAD+) (non-phosphorylating) activity	3	0.297619	8.88761	0.0414078	ALDH1B1, ALDH1A1, ALDH1A7
MF	GO:0008404	arachidonic acid 14,15-epoxygenase activity	3	0.297619	8.88761	0.0414078	CYP2J10, CYP2C11, CYP2C6V1
MF	GO:0102033	cytochrome P450 fatty acid omega-hydroxylase activity	3	0.297619	8.88761	0.0414078	CYP2U1, CYP1A1, CYP4A2
MF	GO:0043565	sequence-specific DNA binding	31	3.0754	1.43819	0.0422577	TOP2A, PRDM1, MEOX2, FOXQ1, CUX2, MYC, TRIM24, HSF4, E2F3, JUNB, IRX1, EGR1, STAT5B, JUN, ARNT, NR1D2, NR1D1, POU3F1, GRHL2, ESR1, FOXP2, FLI1, POU3F3, NR4A1, MAFB, BCL6, ELF3, TEF, LHX2, MAFF, IRF5
MF	GO:0004029	aldehyde dehydrogenase (NAD) activity	4	0.396825	4.87947	0.0457134	ALDH1L1, ALDH1B1, ALDH1A1, ALDH1A7
MF	GO:0045499	chemorepellent activity	5	0.496032	3.57548	0.0487523	SEMA3C, SEMA6D, SEMA4F, NRG1, EFNA5

## Sheet: KEGG (Old vs Young)
Category	ID	Term	Count	%	Fold Enrichment	p-value	Genes
KEGG	rno01100	Metabolic pathways	149	14.7817	1.73612	8.11616e-13	MT-ND6, GUCY1B2, ALDH1L1, CHPF, ACSM3, PRDM6, MSMO1, ACSM5, CYP4A2, CYP3A18, NAMPT, ENPP2, PDE8B, GLUL, G6PD, SDS, HGD, KMO, PISD, ACLY, CYP2U1, AKR1C15, CMPK2, HPD, PLPP2, ACOT4, IDI1, NNMT, PLD1, PLA2G7, ACACB, ACAT2, ACACA, FUT4, ADH6, ACMSD, UGCG, CYP2C12, CYP2C11, AMDHD1, HMOX1, RGD1559459, CYP2C6V1, HAO2, ATP6V1D, ST3GAL3, TMEM86B, CHKA, GOT1, ST8SIA1, SYNJ2, ACER2, SQLE, CYP26A1, ADCY10, B…
KEGG	rno00140	Steroid hormone biosynthesis	19	1.88492	4.2353	3.15708e-07	HSD3B3, AKR1C1, AKR1C3, HSD17B7, CYP7B1, CYP3A18, CYP17A1, CYP3A9, CYP2C12, SULT1E1, CYP2C11, AKR1C15, CYP2D4, CYP1A2, HSD17B2, CYP1A1, CYP1B1, RGD1559459, CYP2C6V1
KEGG	rno04710	Circadian rhythm	10	0.992063	5.5072	5.10793e-05	PER2, PER3, DBP, NFIL3, BHLHE40, BHLHE41, CRY1, NR1D2, NR1D1, NPAS2
KEGG	rno00830	Retinol metabolism	15	1.4881	3.22836	0.000184704	RETSAT, CYP4A2, CYP3A18, ADH6, CYP26A1, CYP3A9, CYP2C12, CYP2C11, CYP1A2, AOX3, ALDH1A1, CYP1A1, RGD1559459, CYP2C6V1, ALDH1A7
KEGG	rno04936	Alcoholic liver disease	19	1.88492	2.6353	0.000280314	MAP2K3, C1QA, CXCL1, ACACB, ADIPOR2, ACACA, ADH6, CCND1, ALDH1B1, SCD, FASN, SCD2, FAS, NOX4, ACOX3, IKBKG, LBP, LPIN2, MAP3K5
KEGG	rno01521	EGFR tyrosine kinase inhibitor resistance	14	1.38889	3.27679	0.000282099	PDGFRB, PDGFRA, EGF, SRC, RPS6, PDGFB, PRKCA, NRG1, EGFR, BCL2L11, AXL, EIF4EBP1, GAS6, FGFR2
KEGG	rno00380	Tryptophan metabolism	11	1.09127	4.03862	0.000298536	ALDH1B1, KYNU, AOX3, CYP1A2, CYP1A1, CYP1B1, KMO, ACAT2, INMT, ACMSD, DHTKD1
KEGG	rno04010	MAPK signaling pathway	31	3.0754	1.92205	0.000709165	PDGFB, HSPB1, EFNA5, FGF1, EGFR, MYC, MKNK2, IKBKG, MAP3K6, MAP3K5, FGF21, MAP2K3, PDGFRB, HSPA8, NTRK2, PDGFRA, JUN, ANGPT2, GADD45B, GADD45A, EGF, PLA2G4C, PRKCA, MAPK8IP1, DUSP7, NR4A1, CACNB4, MAPKAPK2, FAS, MAPT, FGFR2
KEGG	rno05160	Hepatitis C	20	1.98413	2.37019	0.000718567	RB1, EGF, MX2, EIF2AK3, OAS1A, CLDN2, CLDN1, EGFR, PPP2CA, CLDN6, SOCS3, PPP2R1B, CCND1, MYC, CLDN23, PPP2R2D, IRF7, FAS, E2F3, IKBKG
KEGG	rno04151	PI3K-Akt signaling pathway	34	3.37302	1.84531	0.000762538	ITGB3, PDGFB, LPAR3, EFNA5, FGF1, EGFR, THBS4, PPP2CA, RELN, BCL2L11, PPP2R1B, CCND1, MYC, SPP1, EIF4EBP1, IKBKG, JAK3, FGF21, PDGFRB, NTRK2, PDGFRA, ANGPT2, EGF, RPS6, PRKCA, PRLR, NR4A1, COL4A2, CCNE1, COL4A1, IL2RB, PPP2R2D, COL9A3, FGFR2
KEGG	rno04913	Ovarian steroidogenesis	11	1.09127	3.5512	0.000872299	CYP2J10, HSD3B3, AKR1C15, PLA2G4C, HSD17B2, CYP1A1, CYP1B1, HSD17B7, PTGS2, ACOT4, CYP17A1
KEGG	rno05200	Pathways in cancer	47	4.6627	1.63578	0.000918788	RB1, NOTCH2, GSTP1, PDGFB, XIAP, LPAR3, PLD1, PTGS2, FGF1, KNG1, EGFR, GNAI1, LRP6, BCL2L11, CCND1, MYC, HMOX1, E2F3, IKBKG, JAK3, FGF21, JAG2, PDGFRB, STAT5B, PDGFRA, JUN, CDKN2B, EGLN3, GADD45B, IL15, GADD45A, EGF, ZBTB16, ARNT, WNT7A, PRKCA, TRAF1, ESR1, AGT, COL4A2, CCNE1, COL4A1, GSTA3, IL2RB, FAS, FGFR2, PPARD
KEGG	rno05222	Small cell lung cancer	14	1.38889	2.84938	0.0011155	RB1, CDKN2B, GADD45B, GADD45A, XIAP, TRAF1, PTGS2, COL4A2, CCND1, CCNE1, COL4A1, MYC, E2F3, IKBKG
KEGG	rno00270	Cysteine and methionine metabolism	10	0.992063	3.67147	0.0013211	BHMT, SDS, GOT1, PSAT1, CBS, GSS, TAT, PHGDH, SRM, GNMT
KEGG	rno05218	Melanoma	12	1.19048	3.078	0.00155526	RB1, PDGFRB, PDGFRA, CCND1, GADD45B, EGF, GADD45A, PDGFB, E2F3, FGF1, EGFR, FGF21
KEGG	rno00120	Primary bile acid biosynthesis	6	0.595238	6.2415	0.00202294	HSD3B7, AMACR, ACNAT2, CYP7B1, CYP46A1, ACNAT1
KEGG	rno05204	Chemical carcinogenesis - DNA adducts	12	1.19048	2.9565	0.00216795	CYP3A9, CYP2C12, CYP2C11, GSTA3, GSTP1, CYP1A2, CYP1A1, CYP1B1, RGD1559459, CYP2C6V1, PTGS2, CYP3A18
KEGG	rno05207	Chemical carcinogenesis - receptor activation	24	2.38095	1.971	0.00236878	RB1, NOTCH2, STAT5B, JUN, PAQR7, EGF, SRC, XIAP, ARNT, PRKCA, ESR1, EGFR, GNAI1, CYP3A18, CYP3A9, CCND1, BCL6, GSTA3, MYC, CYP1A2, CYP1A1, EIF4EBP1, CYP1B1, RGD1559459
KEGG	rno04152	AMPK signaling pathway	16	1.5873	2.39673	0.0025868	RGD1565355, CIDEA, HMGCR, ACACB, ADIPOR2, ACACA, PPP2CA, PPP2R1B, CCND1, SCD, FASN, PPP2R2D, SCD2, EIF4EBP1, FBP2, CFTR
KEGG	rno00591	Linoleic acid metabolism	8	0.793651	3.7449	0.00470954	CYP2J10, CYP3A9, CYP2C12, CYP2C11, PLA2G4C, CYP1A2, CYP2C6V1, CYP3A18
KEGG	rno05223	Non-small cell lung cancer	11	1.09127	2.8215	0.00509056	RB1, STAT5B, CCND1, GADD45B, EGF, GADD45A, KIF5A, E2F3, PRKCA, JAK3, EGFR
KEGG	rno05219	Bladder cancer	8	0.793651	3.65356	0.00542467	RB1, CCND1, EGF, SRC, MYC, E2F3, EGFR, TYMP
KEGG	rno05214	Glioma	11	1.09127	2.78337	0.00561388	RB1, PDGFRB, PDGFRA, CCND1, GADD45B, EGF, GADD45A, PDGFB, E2F3, PRKCA, EGFR
KEGG	rno05231	Choline metabolism in cancer	13	1.28968	2.48386	0.00570492	PDGFRB, PDGFRA, JUN, SLC44A4, CHKA, EGF, PLA2G4C, PDGFB, PRKCA, PLD1, EGFR, EIF4EBP1, PLPP2
KEGG	rno05215	Prostate cancer	13	1.28968	2.45877	0.00618811	RB1, PDGFRB, PDGFRA, EGF, GSTP1, PDGFB, EGFR, SPINT1, CCND1, CCNE1, E2F3, IKBKG, FGFR2
KEGG	rno04668	TNF signaling pathway	14	1.38889	2.31985	0.00695444	MAP2K3, JUN, IL15, XIAP, IFI47, CXCL1, TRAF1, PTGS2, TNFRSF1B, SOCS3, FAS, IKBKG, JUNB, MAP3K5
KEGG	rno04071	Sphingolipid signaling pathway	15	1.4881	2.22911	0.0070608	CERS3, ASAH1, CERS6, PRKCE, PRKCA, PLD1, KNG1, GNAI1, PPP2CA, ACER2, PPP2R1B, PPP2R2D, S1PR1, ADORA1, MAP3K5
KEGG	rno05165	Human papillomavirus infection	31	3.0754	1.64436	0.00750236	RB1, NOTCH2, ITGB3, RT1-M2, PTGS2, EGFR, THBS4, OASL, PPP2CA, PARD6B, RELN, PPP2R1B, CCND1, SPP1, EIF4EBP1, IKBKG, ATP6V1D, OASL2, PDGFRB, EGF, MX2, RT1-N3, WNT7A, ISG15, COL4A2, CCNE1, COL4A1, PPP2R2D, FAS, COL9A3, LLGL2
KEGG	rno01040	Biosynthesis of unsaturated fatty acids	7	0.694444	3.85504	0.00835513	SCD, ELOVL5, SCD2, ACOX3, ACNAT2, ACNAT1, ACOT4
KEGG	rno04976	Bile secretion	12	1.19048	2.39036	0.0110826	ABCC3, ABCG8, ABCG5, ABCC2, SLCO1B2, SCTR, RGD1559459, HMGCR, ACNAT2, SLC22A8, ACNAT1, CFTR
KEGG	rno04510	Focal adhesion	20	1.98413	1.85391	0.0113227	PDGFRB, PDGFRA, JUN, EGF, SRC, ACTN1, ITGB3, PDGFB, XIAP, PRKCA, PARVB, ARHGAP5, THBS4, EGFR, RELN, COL4A2, CCND1, COL4A1, SPP1, COL9A3
KEGG	rno04630	JAK-STAT signaling pathway	17	1.68651	1.97712	0.0118304	PDGFRB, STAT5B, PDGFRA, CISH, EGF, IL15, IL10RA, PDGFB, PRLR, EGFR, SOCS2, SOCS3, CCND1, MYC, AOX3, IL2RB, JAK3
KEGG	rno05224	Breast cancer	16	1.5873	2.02427	0.0122826	RB1, NOTCH2, JAG2, JUN, GADD45B, EGF, GADD45A, WNT7A, FGF1, ESR1, EGFR, LRP6, CCND1, MYC, E2F3, FGF21
KEGG	rno05226	Gastric cancer	16	1.5873	1.98405	0.0145753	RB1, CDKN2B, GADD45B, EGF, GADD45A, WNT7A, FGF1, EGFR, LRP6, CCND1, CCNE1, MYC, E2F3, CDH17, FGFR2, FGF21
KEGG	rno04064	NF-kappa B signaling pathway	12	1.19048	2.29279	0.0148804	CCL21, BCL2A1, GADD45B, GADD45A, XIAP, CXCL1, IKBKG, LBP, CCL19, TRAF1, PTGS2, CARD14
KEGG	rno03320	PPAR signaling pathway	11	1.09127	2.39499	0.0157163	FABP5, RGD1565355, SCD, FABP7, APOA2, SCD2, ME1, PLIN2, CYP4A2, ACOX3, PPARD
KEGG	rno04360	Axon guidance	18	1.78571	1.8621	0.0162732	UNC5A, SEMA3C, UNC5B, SRC, LIMK2, SEMA6D, PRKCA, SEMA4F, UNC5D, EFNA5, BMP7, GNAI1, PARD6B, BOC, SLIT3, LRRC4C, EPHA3, PLXNA3
KEGG	rno04530	Tight junction	17	1.68651	1.90609	0.0163441	JUN, SRC, ACTN1, PRKCE, CLDN2, CLDN1, PPP2CA, CLDN6, PARD6B, PPP2R1B, CCND1, CLDN23, PPP2R2D, MPDZ, CFTR, MAP3K5, LLGL2
KEGG	rno04540	Gap junction	11	1.09127	2.36746	0.0169432	PDGFRB, PDGFRA, GUCY1B2, TUBB2A, EGF, SRC, PDGFB, ITPR2, PRKCA, GNAI1, EGFR
KEGG	rno04917	Prolactin signaling pathway	10	0.992063	2.4966	0.0176979	SOCS2, SOCS3, STAT5B, GALT, CISH, CCND1, SRC, ESR1, PRLR, CYP17A1
KEGG	rno04115	p53 signaling pathway	10	0.992063	2.4966	0.0176979	STEAP3, CCND1, GADD45B, CCNE1, GADD45A, LOC100359539, SESN2, CCNG1, FAS, GTSE1
KEGG	rno05169	Epstein-Barr virus infection	21	2.08333	1.73989	0.0176985	MAP2K3, RB1, JUN, RT1-DMA, GADD45B, GADD45A, RT1-DOB, RT1-N3, RT1-M2, OAS1A, ISG15, BCL2L11, CCND1, CCNE1, MYC, IRF7, RT1-BA, FAS, E2F3, IKBKG, JAK3
KEGG	rno04750	Inflammatory mediator regulation of TRP channels	13	1.28968	2.11668	0.0192406	MAP2K3, SRC, PRKCE, PLA2G4C, ITPR2, PRKCA, CYP4A2, KNG1, CYP2J10, CYP2C12, CYP2C11, TRPV4, CYP2C6V1
KEGG	rno01200	Carbon metabolism	13	1.28968	2.04553	0.0244867	GPI, G6PD, SDS, ACSS2, GOT1, ACAT2, PSAT1, ME1, RGN, PHGDH, ACOX3, HAO2, FBP2
KEGG	rno05221	Acute myeloid leukemia	9	0.892857	2.47824	0.02739	PER2, STAT5B, BCL2A1, CCND1, MYC, ZBTB16, EIF4EBP1, IKBKG, PPARD
KEGG	rno00590	Arachidonic acid metabolism	10	0.992063	2.31167	0.0278327	CYP2J10, CYP2C12, CYP2U1, CYP2C11, AKR1C15, PLA2G4C, CYP2C6V1, CYP4A2, LTC4S, PTGS2
KEGG	rno04210	Apoptosis	14	1.38889	1.92752	0.0291477	JUN, GADD45B, BCL2A1, GADD45A, EIF2AK3, XIAP, ITPR2, CTSW, TRAF1, BCL2L11, CASP12, FAS, IKBKG, MAP3K5
KEGG	rno04350	TGF-beta signaling pathway	12	1.19048	2.04267	0.0321563	PPP2CA, CDKN2B, PPP2R1B, AMHR2, MYC, FMOD, SKIL, INHBC, BMP7, HAMP, DCN, SMAD7
KEGG	rno00620	Pyruvate metabolism	7	0.694444	2.84938	0.0340995	ACSS2, ALDH1B1, ME1, ACACB, ACAT2, ACACA, ADH6
KEGG	rno04015	Rap1 signaling pathway	19	1.88492	1.67026	0.0352935	MAP2K3, PDGFRB, PDGFRA, ANGPT2, RGS14, EGF, SRC, ITGB3, PDGFB, PRKCA, LPAR3, FGF1, EFNA5, EGFR, GNAI1, PARD6B, ADORA2B, FGFR2, FGF21
KEGG	rno00565	Ether lipid metabolism	7	0.694444	2.78875	0.0374014	TMEM86B, PLA2G4C, ENPP2, GDPD1, PLD1, PLPP2, PLA2G7
KEGG	rno04218	Cellular senescence	17	1.68651	1.72063	0.0379903	MAP2K3, RB1, CDKN2B, GADD45B, GADD45A, RT1-N3, RT1-M2, ITPR2, HIPK3, CCND1, CCNE1, MYC, TRPV4, MAPKAPK2, EIF4EBP1, E2F3, MYBL2
KEGG	rno04934	Cushing syndrome	15	1.4881	1.77764	0.0422501	RB1, CDKN2B, HSD3B3, WNT7A, ITPR2, ARNT, EGFR, AGT, GNAI1, CYP17A1, NR4A1, CCND1, CCNE1, E2F3, PDE8B
KEGG	rno04933	AGE-RAGE signaling pathway in diabetic complications	11	1.09127	2.0393	0.0423216	STAT5B, EGR1, COL3A1, JUN, COL4A2, CCND1, COL4A1, PRKCE, NOX4, PRKCA, AGT
KEGG	rno04724	Glutamatergic synapse	12	1.19048	1.95386	0.0424497	GLS2, PLA2G4C, SLC1A2, SLC1A3, ITPR2, PRKCA, PLD1, SLC1A7, GLUL, GNAI1, GRIA3, KCNJ3
KEGG	rno04730	Long-term depression	8	0.793651	2.45567	0.042501	PPP2CA, GUCY1B2, PPP2R1B, PLA2G4C, ITPR2, PRKCA, GNAI1, GRIA3
KEGG	rno05212	Pancreatic cancer	9	0.892857	2.24694	0.0454291	RB1, CCND1, GADD45B, EGF, GADD45A, E2F3, IKBKG, PLD1, EGFR
KEGG	rno04658	Th1 and Th2 cell differentiation	10	0.992063	2.10388	0.0468937	NOTCH2, JAG2, STAT5B, JUN, RT1-DMA, IL2RB, RT1-DOB, RT1-BA, IKBKG, JAK3
KEGG	rno00980	Metabolism of xenobiotics by cytochrome P450	9	0.892857	2.21737	0.0485192	GSTA3, AKR1C1, GSTP1, CYP1A2, CYP1A1, CYP1B1, RGD1559459, CYP2F4, ADH6
KEGG	rno00350	Tyrosine metabolism	6	0.595238	2.9565	0.0495921	GOT1, HGD, TAT, AOX3, HPD, ADH6

## Sheet: Reactome (Old vs Young)
Category	ID	Term	Count	%	Fold Enrichment	pvalue	Genes
Reactome	R-RNO-1430728	Metabolism	140	13.8889	1.5531	6.89144e-09	MT-ND6, ALDH1L1, SLC46A1, CHPF, MSMO1, ACSM5, CYP3A18, NUDT11, PSMD9, ABHD10, CYP2D4, NAMPT, CYP1B1, CPNE3, GLUL, PHYH, G6PD, SDS, KMO, PLA2G15, BCAN, ACLY, PPP1R3C, CYP2U1, HPD, PLPP2, ACOT4, PLA1A, IDI1, CEMIP, NNMT, ITPR2, PLD1, ADIPOR2, ACAT2, ACACA, ADH6, UGCG, SLCO1B2, AGMO, HMOX1, RGD1559459, HACL1, HAO2, ST3GAL3, TMEM86B, CHKA, GOT1, CYP4F4, SYNJ2, ACER2, SQLE, BHMT, HAL, SLC6A8, VNN1, FA…
Reactome	R-RNO-556833	Metabolism of lipids	62	6.15079	2.00384	1.14298e-07	SLC44A4, MSMO1, AACS, AKR1B7, SMPD3, CYP2D4, TSPO, CYP1B1, CPNE3, CERS3, ABCC3, PHYH, CERS6, ELOVL5, CYP7B1, LSS, PLA2G15, ACLY, BDH2, CYP2U1, MVD, ACOX3, PLPP2, ACOT4, PLA1A, PPARD, IDI1, ASAH1, HMGCR, PLD1, LTC4S, PTGS2, HSD17B7, ACAT2, ACACA, CYP17A1, UGCG, GPAT4, SLCO1B2, AGMO, HSD17B2, HACL1, HAO2, HSD3B7, TMEM86B, CHKA, HSD3B3, AKR1C1, CYP4F4, AKR1C3, SYNJ2, ACER2, SQLE, FABP5, SCD, FABP7, …
Reactome	R-RNO-8957322	Metabolism of steroids	19	1.88492	2.9199	6.39516e-05	ABCC3, HSD3B7, IDI1, HSD3B3, AKR1C1, AKR1C3, MSMO1, HMGCR, HSD17B7, CYP7B1, LSS, ACAT2, AKR1B7, CYP17A1, SQLE, SLCO1B2, HSD17B2, TSPO, MVD
Reactome	R-RNO-211859	Biological oxidations	24	2.38095	2.38105	0.000147252	NNMT, GSTP1, GSS, CYP4F4, FMO1, ARNT, ACSM5, OPLAH, CYP7B1, PAPSS2, CYP3A18, ADH6, ABHD10, CYP2U1, SULT1E1, ALDH1B1, CYP2D4, CYP1A2, ALDH1A1, CYP1A1, CYP2F4, CYP1B1, RGD1559459, SULT4A1
Reactome	R-RNO-2142816	Synthesis of (16-20)-hydroxyeicosatetraenoic acids (HETE)	5	0.496032	11.1966	0.000485388	CYP2U1, CYP1A2, CYP1A1, CYP4F4, CYP1B1
Reactome	R-RNO-211945	Phase I - Functionalization of compounds	14	1.38889	3.04796	0.000524642	CYP4F4, FMO1, ARNT, CYP7B1, CYP3A18, ADH6, CYP2U1, ALDH1B1, CYP2D4, CYP1A2, ALDH1A1, CYP1A1, CYP2F4, CYP1B1
Reactome	R-RNO-191273	Cholesterol biosynthesis	8	0.793651	4.82315	0.000917643	IDI1, SQLE, MSMO1, MVD, HMGCR, HSD17B7, LSS, ACAT2
Reactome	R-RNO-211897	Cytochrome P450 - arranged by substrate type	10	0.992063	3.7322	0.00106577	CYP2U1, CYP2D4, CYP1A2, CYP1A1, CYP4F4, CYP1B1, CYP2F4, ARNT, CYP7B1, CYP3A18
Reactome	R-RNO-71291	Metabolism of amino acids and derivatives	26	2.57937	1.95003	0.00157996	OCA2, OAT, GLS2, TAT, PPM1K, SRM, DHTKD1, PSMD9, CBS, KYNU, PHGDH, CRYM, GLUL, AASS, SDS, GOT1, FMO1, KMO, GNMT, BHMT, HAL, SLC6A8, IVD, HPD, SERINC5, OTC
Reactome	R-RNO-211981	Xenobiotics	6	0.595238	5.87821	0.00247835	CYP2D4, CYP1A2, CYP1A1, CYP2F4, ARNT, CYP3A18
Reactome	R-RNO-186797	Signaling by PDGF	9	0.892857	3.61736	0.00269495	PDGFRB, PDGFRA, STAT5B, COL3A1, COL5A1, SRC, COL4A1, PDGFB, SPP1
Reactome	R-RNO-8978868	Fatty acid metabolism	19	1.88492	2.15818	0.00272315	PHYH, ELOVL5, AKR1C1, CYP4F4, LTC4S, PTGS2, ACACA, ACLY, CYP2U1, SCD, FASN, CYP1A2, CYP1A1, CYP1B1, HACL1, ACOX3, HAO2, ACOT4, PPARD
Reactome	R-RNO-9006934	Signaling by Receptor Tyrosine Kinases	33	3.27381	1.61147	0.00691644	NRP2, SRC, ITGB3, NAB2, PSEN2, PDGFB, PTN, PCSK6, FGF1, PCSK5, PPP2CA, PPP2R1B, SPP1, ATP6V1D, JAK3, PDGFRB, NTRK2, STAT5B, PDGFRA, COL27A1, NCBP2, EGF, PRKCE, MATK, PTK6, NRG1, ESR1, DUSP7, COL3A1, SPINT1, COL5A1, COL4A1, FGFR2
Reactome	R-RNO-9018677	Biosynthesis of DHA-derived SPMs	5	0.496032	6.02894	0.00729497	CYP2D4, CYP1A2, CYP1A1, LTC4S, PTGS2
Reactome	R-RNO-69236	G1 Phase	8	0.793651	3.30005	0.00908916	PPP2CA, RB1, CDKN1C, CDKN2B, PPP2R1B, CCND1, SRC, PTK6
Reactome	R-RNO-69231	Cyclin D associated events in G1	8	0.793651	3.30005	0.00908916	PPP2CA, RB1, CDKN1C, CDKN2B, PPP2R1B, CCND1, SRC, PTK6
Reactome	R-RNO-9018678	Biosynthesis of specialized proresolving mediators (SPMs)	5	0.496032	5.5983	0.00970771	CYP2D4, CYP1A2, CYP1A1, LTC4S, PTGS2
Reactome	R-RNO-168164	Toll Like Receptor 3 (TLR3) Cascade	10	0.992063	2.70263	0.010332	PPP2CA, MAP2K3, APP, JUN, PPP2R1B, TIFA, IRF7, IKBKG, ALPK1, DUSP7
Reactome	R-RNO-975155	MyD88 dependent cascade initiated on endosome	10	0.992063	2.52826	0.0157401	PPP2CA, MAP2K3, APP, JUN, PPP2R1B, TIFA, IRF7, IKBKG, ALPK1, DUSP7
Reactome	R-RNO-168181	Toll Like Receptor 7/8 (TLR7/8) Cascade	10	0.992063	2.48813	0.0173675	PPP2CA, MAP2K3, APP, JUN, PPP2R1B, TIFA, IRF7, IKBKG, ALPK1, DUSP7
Reactome	R-RNO-166166	MyD88-independent TLR4 cascade	10	0.992063	2.44926	0.0191144	PPP2CA, MAP2K3, APP, JUN, PPP2R1B, TIFA, IRF7, IKBKG, ALPK1, DUSP7
Reactome	R-RNO-937061	TRIF(TICAM1)-mediated TLR4 signaling	10	0.992063	2.44926	0.0191144	PPP2CA, MAP2K3, APP, JUN, PPP2R1B, TIFA, IRF7, IKBKG, ALPK1, DUSP7
Reactome	R-RNO-168138	Toll Like Receptor 9 (TLR9) Cascade	10	0.992063	2.41157	0.0209853	PPP2CA, MAP2K3, APP, JUN, PPP2R1B, TIFA, IRF7, IKBKG, ALPK1, DUSP7
Reactome	R-RNO-211958	Miscellaneous substrates	3	0.297619	11.7564	0.0222511	CYP2U1, CYP2D4, CYP3A18
Reactome	R-RNO-112313	Neurotransmitter uptake and metabolism In glial cells	3	0.297619	11.7564	0.0222511	SLC1A2, SLC1A3, GLUL
Reactome	R-RNO-210455	Astrocytic Glutamate-Glutamine Uptake And Metabolism	3	0.297619	11.7564	0.0222511	SLC1A2, SLC1A3, GLUL
Reactome	R-RNO-561048	Organic anion transport	3	0.297619	11.7564	0.0222511	SLC22A12, SLC22A6, SLC22A8
Reactome	R-RNO-2142753	Arachidonic acid metabolism	8	0.793651	2.78671	0.0223193	CYP2U1, AKR1C1, CYP1A2, CYP1A1, CYP4F4, CYP1B1, LTC4S, PTGS2
Reactome	R-RNO-9748784	Drug ADME	11	1.09127	2.21061	0.025263	ABCC3, ABCC2, SULT1E1, AKR1C1, SLCO1B2, GSTP1, CYP2D4, AKR1C3, RGD1559459, ACSM5, SLC28A2
Reactome	R-RNO-196854	Metabolism of vitamins and cofactors	16	1.5873	1.81742	0.0286837	SLC46A1, ALDH1L1, NNMT, LRP1, AKR1C1, APOA2, AKR1C3, PTGS2, ACACA, VNN1, NMRK1, FASN, NAMPT, ACP5, BCO2, MOCS1
Reactome	R-RNO-8983432	Interleukin-15 signaling	4	0.396825	5.70008	0.0287823	STAT5B, IL15, IL2RB, JAK3
Reactome	R-RNO-156580	Phase II - Conjugation of compounds	11	1.09127	2.15534	0.0295555	ABHD10, NNMT, SULT1E1, GSS, GSTP1, CYP1A2, RGD1559459, ACSM5, OPLAH, SULT4A1, PAPSS2
Reactome	R-RNO-114608	Platelet degranulation	13	1.28968	1.9594	0.0318255	LGALS3BP, CFD, CD63, APP, EGF, ACTN1, ITGB3, PDGFB, CTSW, SCCPDH, MMRN1, CD9, FAM3C
Reactome	R-RNO-3000178	ECM proteoglycans	6	0.595238	3.24315	0.0341121	BCAN, APP, COL3A1, COL5A1, ITGB3, DCN
Reactome	R-RNO-193807	Synthesis of bile acids and bile salts via 27-hydroxycholesterol	4	0.396825	5.22508	0.036605	HSD3B7, AKR1C1, AKR1C3, CYP7B1
Reactome	R-RNO-196849	Metabolism of water-soluble vitamins and cofactors	11	1.09127	2.07744	0.036926	SLC46A1, ALDH1L1, VNN1, NNMT, NMRK1, FASN, NAMPT, ACP5, PTGS2, MOCS1, ACACA
Reactome	R-RNO-166016	Toll Like Receptor 4 (TLR4) Cascade	10	0.992063	2.17712	0.0379021	PPP2CA, MAP2K3, APP, JUN, PPP2R1B, TIFA, IRF7, IKBKG, ALPK1, DUSP7
Reactome	R-RNO-168142	Toll Like Receptor 10 (TLR10) Cascade	9	0.892857	2.31274	0.0382263	PPP2CA, MAP2K3, APP, JUN, PPP2R1B, TIFA, IKBKG, ALPK1, DUSP7
Reactome	R-RNO-168176	Toll Like Receptor 5 (TLR5) Cascade	9	0.892857	2.31274	0.0382263	PPP2CA, MAP2K3, APP, JUN, PPP2R1B, TIFA, IKBKG, ALPK1, DUSP7
Reactome	R-RNO-975138	TRAF6 mediated induction of NFkB and MAP kinases upon TLR7/8 or 9 activation	9	0.892857	2.31274	0.0382263	PPP2CA, MAP2K3, APP, JUN, PPP2R1B, TIFA, IKBKG, ALPK1, DUSP7
Reactome	R-RNO-975871	MyD88 cascade initiated on plasma membrane	9	0.892857	2.31274	0.0382263	PPP2CA, MAP2K3, APP, JUN, PPP2R1B, TIFA, IKBKG, ALPK1, DUSP7
Reactome	R-RNO-2022090	Assembly of collagen fibrils and other multimeric structures	6	0.595238	3.13505	0.0388738	COL3A1, COL27A1, LOX, COL5A1, COL4A1, LOXL4
Reactome	R-RNO-8848021	Signaling by PTK6	7	0.694444	2.74317	0.0390857	SOCS3, SRMS, CCND1, EGF, LRRK2, NRG1, PTK6
Reactome	R-RNO-9006927	Signaling by Non-Receptor Tyrosine Kinases	7	0.694444	2.74317	0.0390857	SOCS3, SRMS, CCND1, EGF, LRRK2, NRG1, PTK6
Reactome	R-RNO-6811558	PI5P, PP2A and IER3 Regulate PI3K/AKT Signaling	11	1.09127	2.05271	0.039643	PPP2CA, PDGFRB, PDGFRA, PPP2R1B, EGF, SRC, PDGFB, NRG1, FGF1, ESR1, FGFR2
Reactome	R-RNO-76005	Response to elevated platelet cytosolic Ca2+	13	1.28968	1.88683	0.0409422	LGALS3BP, CFD, CD63, APP, EGF, ACTN1, ITGB3, PDGFB, CTSW, SCCPDH, MMRN1, CD9, FAM3C
Reactome	R-RNO-181438	Toll Like Receptor 2 (TLR2) Cascade	9	0.892857	2.27544	0.0415576	PPP2CA, MAP2K3, APP, JUN, PPP2R1B, TIFA, IKBKG, ALPK1, DUSP7
Reactome	R-RNO-168179	Toll Like Receptor TLR1:TLR2 Cascade	9	0.892857	2.27544	0.0415576	PPP2CA, MAP2K3, APP, JUN, PPP2R1B, TIFA, IKBKG, ALPK1, DUSP7
Reactome	R-RNO-168188	Toll Like Receptor TLR6:TLR2 Cascade	9	0.892857	2.27544	0.0415576	PPP2CA, MAP2K3, APP, JUN, PPP2R1B, TIFA, IKBKG, ALPK1, DUSP7
Reactome	R-RNO-166058	MyD88:MAL(TIRAP) cascade initiated on plasma membrane	9	0.892857	2.27544	0.0415576	PPP2CA, MAP2K3, APP, JUN, PPP2R1B, TIFA, IKBKG, ALPK1, DUSP7
Reactome	R-RNO-9749641	Aspirin ADME	5	0.496032	3.56255	0.0474907	ABCC3, ABCC2, CYP2D4, RGD1559459, ACSM5

## Sheet: BP (Old-CR vs Old)
Category	ID	Term	Count	%	Fold Enrichment	pvalue	Genes
BP	GO:0009410	response to xenobiotic stimulus	65	6.80628	2.66291	1.54187e-12	CD86, CDKN1A, ALAS1, THRA, CCNT1, AQP7, CROT, VLDLR, CYP4A2, ENO2, COMT, AACS, CASP12, TSPO, ABCG8, ABCG5, HMGCS1, MMP2, IGFBP2, CYP7B1, DUSP6, MMP12, POR, LOX, CCNE1, ALDH1A1, MVD, PLIN2, CYP2E1, NNMT, TP53I13, SRC, EI24, SLC1A2, PDGFB, LPL, PRICKLE1, LTC4S, PTGS2, ACACB, NPAS2, CYP17A1, LDHA, SOCS1, GNA12, ABL1, CYP2B1, HMOX1, MAP2K6, NTRK1, HSPA8, NQO1, GK, MGMT, SRD5A1, AKR1C1, INHBA, EEF2, P…
BP	GO:0014070	response to organic cyclic compound	44	4.60733	3.00987	2.16876e-10	CDKN1A, BTG2, ALAS1, TP53I13, TPMT, PDGFB, COMT, ENO2, PTGS2, MKI67, CYP7A1, ACACB, AACS, CYP17A1, EDNRA, LDHA, NAMPT, CYP2B1, CYP1B1, ANXA7, CCN2, IGFBP1, NQO1, G6PD, HMGCS1, LUM, IGFBP4, MGMT, SRD5A1, EPHX1, IGFBP2, LIFR, NR0B2, DUSP6, COL1A1, MMP12, CYP2C7, CCNE1, CYP1A2, ID1, ALDH1A1, PLIN2, ALDOC, SLC22A8
BP	GO:0006805	xenobiotic metabolic process	19	1.98953	4.57726	1.24497e-07	CBR1, TPMT, RORC, FMO1, SULT1C3, CYP2C13, GSTA6, CYP2C24, CYP2C7, CYP2C12, NCEH1, CYP2C11, CYP1A2, AOX3, CYP2B1, AOX1, CYP1B1, CYP2E1, SULT2A1
BP	GO:0008202	steroid metabolic process	14	1.46597	5.34983	1.38687e-06	AKR1C1, AKR1C3, AKR1C2, SDR9C7, CYP17A1, AKR1C12, CYP3A9, CYP2C11, AKR1C14, CYP1B1, RGD1559459, CYP2E1, SULT4A1, SULT2A1
BP	GO:0010243	response to organonitrogen compound	15	1.57068	4.61742	3.35252e-06	CDKN1A, BTG2, NNMT, CROT, PTGS2, AACS, BHMT, CYP2C7, CASP12, CCNE1, UBD, CCNG1, ALDOC, CYP2E1, TP73
BP	GO:0032922	circadian regulation of gene expression	15	1.57068	4.43272	5.54793e-06	CAVIN3, USP2, RORC, NR0B2, NPAS2, CIART, PER2, PER1, PER3, NOCT, NAMPT, CRY2, ID1, CRY1, CLOCK
BP	GO:0043065	positive regulation of apoptotic process	41	4.29319	2.18439	5.71127e-06	FOXA1, ZFP622, STEAP3, USP27X, SRC, PDCD5, ITPR1, NLRC4, PTGS2, PPP2CA, LDHA, CASP12, ADAMTSL4, UBD, RASSF6, ABL1, HMOX1, CYP1B1, TSPO, CCN2, PHLDA3, MAP2K6, ZBP1, MOAP1, PRMT2, TNFRSF12A, TSC22D1, DUSP1, SPHK2, ZBTB16, MMP2, UNC5C, DUSP6, RHOB, GADD45G, ADCY10, BCL6, ALDH1A1, ATF6, CALM2, TP73
BP	GO:0032355	response to estradiol	27	2.82723	2.74503	6.03839e-06	FOXA1, RYR1, INSIG1, PDGFB, CXCL1, ENO2, PTGS2, AURKA, CYP3A9, SOCS1, CYP1B1, CCN2, HSPA8, CBR1, SLC34A2, NQO1, DUSP1, VDR, SRD5A1, IGFBP2, EEF2, ESR1, COL1A1, GJB2, CCNE1, CYP1A2, ALDH1A1
BP	GO:0007568	aging	34	3.56021	2.19059	3.8356e-05	CDKN1C, CD86, C1QA, CNP, HSPB1, PTGS2, LITAF, CLDN1, ADH5, EDNRA, CASP12, KYNU, SPINK1L, NAMPT, TSPO, CCN2, SULT2A1, POLG, IGFBP1, NTRK1, HSPA8, SLC34A2, NQO1, GSN, VDR, MMP2, IGFBP2, EEF2, DCN, GJB2, ALDOC, GCLM, HAMP, ABCG2
BP	GO:0010033	response to organic substance	22	2.30366	2.66448	8.13037e-05	NQO1, CDKN1A, BTG2, ALAS1, HMGCS1, GK, DUSP1, CCNF, PDGFB, AVPR1A, PTGS2, DUSP6, CYP17A1, EDNRA, PAK1, CDK6, DUSP10, CCNE2, CCNE1, CYP1A2, CYP1B1, CDH13
BP	GO:0045471	response to ethanol	25	2.6178	2.40909	0.000119373	ALAS1, CYP7A1, CLDN1, AACS, ADH6, NEU2, CYP3A9, CASP12, DMAP1, NTRK1, HSPA8, NQO1, G6PD, SPINK1, GSN, GK, MGMT, EEF2, NR0B2, CLDN5, CYP2C7, CCNE1, ALDH1A1, CYP2E1, HAMP
BP	GO:0042448	progesterone metabolic process	6	0.628272	10.2294	0.00017472	SRD5A1, AKR1C1, AKR1C14, AKR1C3, AKR1C2, CYP17A1
BP	GO:0032259	methylation	11	1.15183	4.35356	0.000177265	N6AMT1, BHMT, AS3MT, NNMT, TPMT, MGMT, SMYD4, DMAP1, METTL7A, COMT, INMT
BP	GO:0030199	collagen fibril organization	11	1.15183	4.20344	0.000239481	COL1A1, MMP11, COL3A1, LOX, LUM, OPTC, COL5A2, LOXL4, CYP1B1, DPT, LOXL1
BP	GO:0007623	circadian rhythm	17	1.7801	2.83294	0.000324654	NTRK1, RORC, CYP7B1, NR0B2, NPAS2, PER2, PER1, PER3, DBP, NFIL3, NOCT, NAMPT, CRY2, ID1, CRY1, ATF5, CLOCK
BP	GO:0032496	response to lipopolysaccharide	27	2.82723	2.11455	0.000484415	CD86, CNP, CXCL1, VLDLR, COMT, PTGS2, LTC4S, LITAF, CLDN1, LOXL1, ADH5, EDNRA, SOCS1, DUSP10, NOCT, CBR1, NQO1, FMO1, SMAD6, DCN, CXCL10, GJB2, CYP2C7, CYP1A2, EPHA3, CFB, ABCG2
BP	GO:0044772	mitotic cell cycle phase transition	7	0.732984	6.46438	0.000551172	CCNJ, CCNE2, CCNE1, CCNF, CCNG1, CKS2, LZTS1
BP	GO:0071372	cellular response to follicle-stimulating hormone stimulus	8	0.837696	5.21496	0.000681745	PPP2CA, POR, EDNRA, HMGCS1, AKR1C3, INHBA, GCLM, EPHA3
BP	GO:0009404	toxin metabolic process	5	0.52356	11.0818	0.000691669	N6AMT1, AS3MT, CYP1A2, CYP1B1, FMO1
BP	GO:0043627	response to estrogen	15	1.57068	2.84149	0.000792238	SLC34A2, SRD5A1, AKR1C1, PTPRN, MMP2, IGFBP2, PDGFB, COMT, SMAD6, ESR1, CYP3A9, LDHA, HMOX1, ZFP366, GSTM5
BP	GO:0018108	peptidyl-tyrosine phosphorylation	12	1.25654	3.20438	0.00121625	NTRK1, FGR, WEE1, EFEMP1, PKDCC, SPINK1, SRMS, SRC, LRRK1, ABL1, PDGFB, EPHA3
BP	GO:0006082	organic acid metabolic process	9	0.942408	4.07086	0.00143815	CYP2C13, CYP2C24, CYP2C7, CYP2C12, CYP2C11, CYP2B1, FMO1, CYP2E1, CYP17A1
BP	GO:0051593	response to folic acid	6	0.628272	6.64908	0.00161783	ZFP354A, GSN, MGMT, ASCL1, EEF2, ABCG2
BP	GO:2000323	negative regulation of glucocorticoid receptor signaling pathway	4	0.418848	14.7757	0.00164675	PER1, CRY2, CRY1, CLOCK
BP	GO:0006641	triglyceride metabolic process	8	0.837696	4.43272	0.00186849	GK, SCD, INSIG2, INSIG1, APOF, PLAAT3, DBI, CYP2E1
BP	GO:0008210	estrogen metabolic process	7	0.732984	5.17151	0.00193076	CYP3A9, SULT1E1, CYP2C11, CYP1A2, CYP1B1, RGD1559459, COMT
BP	GO:0043153	entrainment of circadian clock by photoperiod	7	0.732984	5.17151	0.00193076	PER2, PER1, PER3, CRY2, USP2, CRY1, SIK1
BP	GO:0007264	small GTPase mediated signal transduction	13	1.36126	2.85274	0.00194617	DOCK4, ARHGAP8, ARHGAP18, RHOC, VAV1, RHOBTB1, RHOB, DOCK11, PAK1, ARHGAP30, RASGEF1B, HMOX1, RALGPS1
BP	GO:0019373	epoxygenase P450 pathway	7	0.732984	5.00468	0.00230417	CYP2C13, CYP2C24, CYP2C7, CYP2C12, CYP2C11, CYP2B1, CYP2E1
BP	GO:0006695	cholesterol biosynthetic process	8	0.837696	4.22164	0.002501	G6PD, HMGCS1, CES1D, INSIG2, INSIG1, MVD, DHCR7, LSS
BP	GO:0051923	sulfation	6	0.628272	6.04462	0.00254995	SULT1C3, SULT1C2, SULT1E1, RGD1559960, SULT4A1, SULT2A1
BP	GO:0008203	cholesterol metabolic process	11	1.15183	3.12564	0.00257151	SULT1C3, APON, CES1D, INSIG2, INSIG1, CYP1A2, LRP5, APOF, VLDLR, CYP7B1, SULT2A1
BP	GO:0006468	protein phosphorylation	45	4.71204	1.57561	0.00300541	NIM1K, CCNT1, SRC, RORC, PDGFB, AURKA, EDNRA, RPS6KA6, PAK1, GRK5, STK35, PDK4, ABL1, TRIM24, TLK1, CAMK2G, FNIP2, TRPM6, MAP4K4, MAP2K6, PRRT1, CDKL2, MAP2K3, NTRK1, NEK8, SRMS, NEK6, LIMK1, MOK, PASK, ATG13, MAPK13, HIPK2, CIT, FGR, PINK1, WEE1, SBK1, CDK6, CCNE1, TYRO3, SIK1, ROR1, GAS6, EPHA3
BP	GO:0002931	response to ischemia	12	1.25654	2.8294	0.00332858	PER2, MAP2K3, NQO1, PINK1, GJB2, MEF2C, UBD, PPIF, HSPB1, EEF2, HK2, MAP2K6
BP	GO:0007584	response to nutrient	15	1.57068	2.44451	0.00334297	ABCG8, NQO1, ABCG5, AHCY, IGFBP2, AKR1C3, VLDLR, AACS, COL1A1, POR, LDHA, CYP2C7, CYP1B1, GCLM, A2M
BP	GO:0042572	retinol metabolic process	9	0.942408	3.56201	0.00343541	CES2A, CES2E, RETSAT, CES1D, CYP1A2, ALDH1A1, CYP1B1, SDR9C7, ADH6
BP	GO:0042981	regulation of apoptotic process	18	1.88482	2.192	0.00363684	MOAP1, NQO1, RTKN, GLS2, LRP5, NLRC4, ESR1, MALT1, CXCL10, POR, PINK1, CASP12, LOX, RASSF6, PPIF, TNFAIP8L1, ABL1, TRIM24
BP	GO:0032869	cellular response to insulin stimulus	16	1.67539	2.31776	0.00388539	ALAS1, GOT1, SRD5A1, SRC, INSIG2, INSIG1, GPT2, IRS2, VLDLR, GCK, ZFP36L1, PPP2CA, PAK1, PNPLA3, LPIN1, SLC25A33
BP	GO:0060326	cell chemotaxis	11	1.15183	2.86823	0.00482685	DOCK4, LOX, CCL21, BIN2, ARHGEF16, PDGFB, ACKR2, CXCL1, CXCL14, CCL27, HBEGF
BP	GO:0000122	negative regulation of transcription from RNA polymerase II promoter	62	6.49215	1.42251	0.00492138	FOXA1, CDKN1C, BTG2, ZBTB25, THRA, RORC, BACH1, HHEX, SALL1, ZFP366, MEF2C, PEG3, RGD1565355, USP2, ZFP217, DUSP26, ZFP90, HIC1, TLE6, MMP12, RIPPLY1, CCNE1, CRY2, CRY1, LCOR, SIK1, AJUBA, ZNF750, AEBP1, ASCL1, PPP2CA, CUX2, NFIL3, DMAP1, FNIP2, IRX1, IL33, MYEF2, VDR, ZBTB16, CBX1, CELA1, NR0B2, ESR1, SORBS3, HIPK2, ZFP354A, PER2, PER1, CDK6, PER3, H1F2, BCL6, BRMS1L, TRPV4, ID1, CREBRF, RLIM, M…
BP	GO:0000079	regulation of cyclin-dependent protein serine/threonine kinase activity	7	0.732984	4.30959	0.00503602	CDKN1A, CCNJ, CCNE2, CCNE1, CCNF, CCNG1, MNAT1
BP	GO:0016042	lipid catabolic process	11	1.15183	2.83488	0.00524727	NEU2, NCEH1, PNPLA7, CES1D, PLCL2, ADORA1, PLAAT1, LPL, PLAAT3, PLD1, PLA1A
BP	GO:0030855	epithelial cell differentiation	13	1.36126	2.52743	0.0053092	CBR1, AKR1C1, ANXA4, AKR1C2, KRT23, KRT10, CNN3, LGALS3, ELF3, CES1D, ANXA7, ALDOC, STX2
BP	GO:0006470	protein dephosphorylation	15	1.57068	2.30871	0.00557407	DUSP2, DUSP1, PTPRN, PDXP, PPM1J, DUSP8, DUSP26, CDC14A, DUSP6, CDC14B, PPP2CA, NCEH1, DUSP10, CTDSP2, CDKN3
BP	GO:2000379	positive regulation of reactive oxygen species metabolic process	7	0.732984	4.19311	0.0057862	CBR1, CDKN1A, AKR1C1, PDGFB, AKR1C3, CYP1B1, TSPO
BP	GO:0034605	cellular response to heat	9	0.942408	3.27004	0.00585011	CXCL10, HSPA8, CDKN1A, TCIM, ST8SIA1, TRPV4, HMOX1, MKI67, PTGS2
BP	GO:0071395	cellular response to jasmonic acid stimulus	3	0.314136	22.1636	0.00590395	AKR1C1, AKR1C3, AKR1C2
BP	GO:0006084	acetyl-CoA metabolic process	4	0.418848	9.85049	0.00624665	ACLY, HMGCS1, FASN, ACACB
BP	GO:0055085	transmembrane transport	23	2.40838	1.86726	0.00630613	ABCG8, ABCG5, AABR07028997.1, SVOP, AQP8, UST5R, TAP1, SLC16A10, ABCB9, SLC22A23, SLC22A25, GJC3, GJB2, SLC25A30, SLC25A40, FLVCR2, SLC25A43, SLC22A8, CNNM2, SLC25A47, SLC39A4, SLC16A4, ABCG2
BP	GO:0043523	regulation of neuron apoptotic process	7	0.732984	4.08277	0.00661469	G6PD, PINK1, MEF2C, TRIM2, SIGMAR1, ESR1, TP73
BP	GO:0000226	microtubule cytoskeleton organization	14	1.46597	2.28155	0.0084973	GAS2L3, CNP, TUBA3A, CDC14A, AURKA, CDC14B, ATAT1, WEE1, TUBB6, TUBB2A, PRC1, FIGNL1, TTLL1, NDEL1
BP	GO:0038183	bile acid signaling pathway	5	0.52356	5.83252	0.00923563	ABCG8, ABCG5, VDR, CYP7A1, CYP8B1
BP	GO:0071276	cellular response to cadmium ion	7	0.732984	3.78403	0.00961413	HSPA8, MT2A, GSN, CYP1A2, AKR1C3, HMOX1, MT1
BP	GO:0043410	positive regulation of MAPK cascade	18	1.88482	1.97497	0.0101045	MAP2K3, NTRK1, ZFP622, CAV2, IGFBP4, GDF15, PDGFB, SORBS3, GADD45G, DOK1, DOK2, TRIM5, ADORA1, ROR1, JCAD, TMEM106A, TP73, MAP2K6
BP	GO:0009416	response to light stimulus	7	0.732984	3.69393	0.0107997	PER1, DUSP1, CRY2, SLC1A2, CRY1, CLOCK, POLG
BP	GO:0045591	positive regulation of regulatory T cell differentiation	5	0.52356	5.5409	0.0111401	SOCS1, DUSP10, BCL6, CD46, LILRB4
BP	GO:0042573	retinoic acid metabolic process	5	0.52356	5.5409	0.0111401	CYP3A9, CYP2C24, CRABP2, ALDH1A1, ADH6
BP	GO:0015823	phenylalanine transport	3	0.314136	16.6227	0.0114553	SLC7A5, SLC43A2, SLC16A10
BP	GO:0060745	mammary gland branching involved in pregnancy	3	0.314136	16.6227	0.0114553	VDR, ESR1, CSMD1
BP	GO:0051409	response to nitrosative stress	3	0.314136	16.6227	0.0114553	GCLM, DUSP6, ADH5
BP	GO:0006725	cellular aromatic compound metabolic process	3	0.314136	16.6227	0.0114553	EPHX1, CYP1A2, CYP1B1
BP	GO:0006068	ethanol catabolic process	4	0.418848	8.05949	0.0114695	SULT1E1, ALDH1A7, ADH5, SULT2A1
BP	GO:0044597	daunorubicin metabolic process	4	0.418848	8.05949	0.0114695	AKR1C1, AKR1C14, AKR1C3, AKR1C2
BP	GO:0044598	doxorubicin metabolic process	4	0.418848	8.05949	0.0114695	AKR1C1, AKR1C14, AKR1C3, AKR1C2
BP	GO:0031667	response to nutrient levels	17	1.7801	1.99355	0.0117069	NTRK1, ABCG8, ABCG5, MEF2C, SPINK1, ALAS1, SDS, THRA, SRC, CYP8B1, ACACB, CYP17A1, COL1A1, FASN, PSPH, SULT2A1, FGF21
BP	GO:0019221	cytokine-mediated signaling pathway	14	1.46597	2.18514	0.0119735	CISH, PTPRN, EBI3, LIFR, INHBA, OSMR, IL17RD, PRLR, LILRB4, IL17RB, SOCS1, IL7, IL3RA, IL11RA1
BP	GO:0019432	triglyceride biosynthetic process	5	0.52356	5.27705	0.01328	GK, PNPLA3, LPL, GPAT2, LPIN1
BP	GO:0070328	triglyceride homeostasis	6	0.628272	4.15567	0.0134559	ABCG8, ABCG5, GCKR, ADORA1, LPL, ANGPTL4
BP	GO:0009617	response to bacterium	19	1.98953	1.87159	0.0135067	CFD, GPM6A, GSTM3, CXCL9, ABCD2, GAS2L3, REG4, LPL, PLAAT3, MGC105649, PRLR, PSMB9, CXCL10, MT2A, GSTA6, FABP4, SCD, CYP2B1, CYP2E1
BP	GO:0007611	learning or memory	10	1.04712	2.60748	0.0142119	PRRT1, NTRK1, MEF2C, GM2A, THRA, SRC, ZFP385A, ABL1, DBI, LHX8
BP	GO:0009887	animal organ morphogenesis	13	1.36126	2.21636	0.0144938	NTNG1, NEK8, LAMA5, LAMB3, THRA, VDR, LAMC2, PRICKLE1, TGM1, HHEX, SLIT3, LHX4, FGF21
BP	GO:0043123	positive regulation of I-kappaB kinase/NF-kappaB signaling	17	1.7801	1.94217	0.0147261	SECTM1B, CCL21, RGD1565355, NEK6, RHOC, LITAF, MALT1, PINK1, TRIM5, UBD, TIFA, ABL1, HMOX1, ROR1, TLR6, AJUBA, TMEM106A
BP	GO:0031670	cellular response to nutrient	4	0.418848	7.38786	0.0147872	CCNE1, HMOX1, LPL, DBI
BP	GO:0014074	response to purine-containing compound	4	0.418848	7.38786	0.0147872	HMGCS1, CCNE1, ADORA1, AACS
BP	GO:0034446	substrate adhesion-dependent cell spreading	8	0.837696	3.05705	0.0150088	NTNG1, LAMA5, LAMB3, SRC, ABL1, TYRO3, LAMC2, SRCIN1
BP	GO:0070542	response to fatty acid	7	0.732984	3.37272	0.01658	SCD, SRC, INSIG2, INSIG1, SCD2, CCN2, PTGS2
BP	GO:0043086	negative regulation of catalytic activity	5	0.52356	4.81817	0.0183014	NQO1, IL7, TMBIM1, ANGPTL4, ACACB
BP	GO:0006633	fatty acid biosynthetic process	7	0.732984	3.30096	0.0183038	ACLY, SCD, ELOVL5, FASN, SCD2, LPL, ACACB
BP	GO:0035556	intracellular signal transduction	30	3.14136	1.56082	0.0184289	NIM1K, SRC, LRRK1, HSPB1, EDNRA, PAK1, SOCS1, GNA12, HMOX1, TLK1, CCN2, MPDZ, MAP4K4, CISH, DUSP1, IGFBP4, PLCL2, MOK, PASK, VAV1, MAPK13, CIT, DOK1, ADCY10, SPSB2, PINK1, RP1, SIK1, LCP2, SPSB4
BP	GO:0018057	peptidyl-lysine oxidation	3	0.314136	13.2982	0.0185241	LOX, LOXL4, LOXL1
BP	GO:0097241	hematopoietic stem cell migration to bone marrow	3	0.314136	13.2982	0.0185241	GAS6, JAM2, JAM3
BP	GO:0051902	negative regulation of mitochondrial depolarization	3	0.314136	13.2982	0.0185241	HSH2D, GOT1, SRC
BP	GO:0055096	low-density lipoprotein particle mediated signaling	3	0.314136	13.2982	0.0185241	RGD1565355, CDH13, LPL
BP	GO:0015833	peptide transport	3	0.314136	13.2982	0.0185241	TAP1, ABCB9, DISP1
BP	GO:0006007	glucose catabolic process	3	0.314136	13.2982	0.0185241	LRP5, GCK, HK2
BP	GO:0072656	maintenance of protein location in mitochondrion	3	0.314136	13.2982	0.0185241	PINK1, TSPO, HK2
BP	GO:0072709	cellular response to sorbitol	3	0.314136	13.2982	0.0185241	MAP2K3, MAPK13, MAP2K6
BP	GO:0016477	cell migration	23	2.40838	1.68796	0.0187551	NTNG1, LAMA5, OLR59, LAMB3, SRC, MMP2, PDGFB, IRS2, PRICKLE1, RHOC, VAV1, RHOB, CORO1C, SYDE2, PAK1, TYRO3, KCTD13, CCN2, MISP, EPHA3, JAM3, HBEGF, NDEL1
BP	GO:0006631	fatty acid metabolic process	10	1.04712	2.46262	0.0200239	PER2, FABP4, CRYL1, LPL, DBI, CROT, GPAT2, CYP2E1, ACSF2, AACS
BP	GO:0035264	multicellular organism growth	13	1.36126	2.11858	0.0200303	CDKN1C, PKDCC, SLC1A2, CELA1, PRICKLE1, ZFP36L1, COL3A1, HHEX, TTC8, GPD2, DHCR7, ATF5, APBA2
BP	GO:0050729	positive regulation of inflammatory response	11	1.15183	2.3219	0.0200413	ZBP1, IL33, EDNRA, FABP4, TRPV4, NKG7, LPL, ADAM8, TLR6, CLOCK, IL17RB
BP	GO:0043409	negative regulation of MAPK cascade	7	0.732984	3.23219	0.0201463	DUSP2, DUSP10, DUSP1, DUSP8, DUSP26, LILRB4, DUSP6
BP	GO:0006094	gluconeogenesis	7	0.732984	3.23219	0.0201463	PER2, SDS, GOT1, GPD2, CRY1, ALDOC, ENO2
BP	GO:0071397	cellular response to cholesterol	5	0.52356	4.61742	0.0211977	HMGCS1, CES1D, INHBA, CYP7A1, AACS
BP	GO:0050872	white fat cell differentiation	5	0.52356	4.61742	0.0211977	PER2, FABP4, SCD, PNPLA3, AACS
BP	GO:0031100	animal organ regeneration	10	1.04712	2.43556	0.0213659	CDKN1A, NNMT, SOCS1, CCNE1, LIFR, ALDOC, MKI67, GAS6, LPIN1, NR0B2
BP	GO:0007219	Notch signaling pathway	12	1.25654	2.18003	0.0219405	MESP2, RIPPLY1, CFD, FOXA1, HHEX, CDK6, GOT1, PERP, ANXA4, ASCL1, DTX4, NR0B2
BP	GO:0000278	mitotic cell cycle	13	1.36126	2.08787	0.0221864	NUP214, CENPW, TUBA3A, GEM, AURKA, CIT, PPP2CA, EDNRA, WEE1, TUBB6, TUBB2A, CDH13, MYBL1
BP	GO:0016098	monoterpenoid metabolic process	3	0.314136	11.0818	0.0269628	CYP2C11, CYP1A2, CYP2E1
BP	GO:0007599	hemostasis	3	0.314136	11.0818	0.0269628	ZFP385A, TSPAN18, ANXA7
BP	GO:0006072	glycerol-3-phosphate metabolic process	3	0.314136	11.0818	0.0269628	GK, GPD2, GPAT2
BP	GO:0015840	urea transport	3	0.314136	11.0818	0.0269628	SLC14A1, AQP8, AQP7
BP	GO:0001666	response to hypoxia	22	2.30366	1.64729	0.0276412	RYR1, AHCY, ALAS1, PRMT2, MMP2, ITPR1, PDGFB, ARNT, VLDLR, HK2, MMP12, ZFP354A, EDNRA, LDHA, PAK1, UBD, ADORA1, HMOX1, ALDOC, ANGPTL4, CAMK2G, AJUBA
BP	GO:0006739	NADP metabolic process	4	0.418848	5.91029	0.027663	G6PD, NOCT, ME1, GCK
BP	GO:0071897	DNA biosynthetic process	5	0.52356	4.26223	0.0277902	LOX, TERC, SRC, CCN2, POLG
BP	GO:0001523	retinoid metabolic process	5	0.52356	4.26223	0.0277902	CES2A, CES2E, CES1D, ALDH1A1, ADH5
BP	GO:0001817	regulation of cytokine production	8	0.837696	2.6865	0.0286222	JPH4, MAP2K3, SOCS1, ZBTB25, BCL6, LITAF, HIC1, CD276
BP	GO:0042752	regulation of circadian rhythm	8	0.837696	2.6865	0.0286222	PER2, PER1, NOCT, CRY2, CRY1, CLOCK, NPAS2, SPSB4
BP	GO:0000281	mitotic cytokinesis	7	0.732984	2.98356	0.0287661	RTKN, CKAP2, TRIM36, RHOC, STX2, RHOB, CIT
BP	GO:0035904	aorta development	6	0.628272	3.40978	0.0297623	COL3A1, EDNRA, LOX, PRICKLE1, SMAD6, LOXL1
BP	GO:0000082	G1/S transition of mitotic cell cycle	8	0.837696	2.6464	0.0307665	HSPA8, CDKN1A, CDK6, CCNE2, CCNE1, INHBA, MNAT1, CAMK2G
BP	GO:0046777	protein autophosphorylation	16	1.67539	1.81855	0.0309069	NTRK1, HSPA8, SRC, NEK6, PASK, ATG13, FGR, PAK1, GRK5, ABL1, TYRO3, TRIM24, SIK1, CAMK2G, CALM2, HTATIP2
BP	GO:2000773	negative regulation of cellular senescence	5	0.52356	4.10437	0.0314946	CDK6, BCL6, TERC, NAMPT, ABL1
BP	GO:0006693	prostaglandin metabolic process	5	0.52356	4.10437	0.0314946	AKR1C1, AKR1C14, AKR1C3, AKR1C2, AKR1B7
BP	GO:0030325	adrenal gland development	6	0.628272	3.32454	0.0327963	CDKN1C, SALL1, THRA, CYP1B1, TSPO, CYP17A1
BP	GO:0048771	tissue remodeling	4	0.418848	5.5409	0.0329325	MMP2, CELA1, GAS6, THBS4
BP	GO:0035970	peptidyl-threonine dephosphorylation	4	0.418848	5.5409	0.0329325	PPP2CA, DUSP10, DUSP1, PPM1K
BP	GO:0032736	positive regulation of interleukin-13 production	4	0.418848	5.5409	0.0329325	IL33, SPHK2, RT1-A2, IL17RB
BP	GO:2001256	regulation of store-operated calcium entry	4	0.418848	5.5409	0.0329325	JPH4, SPINK1, CRACR2B, HOMER2
BP	GO:0006699	bile acid biosynthetic process	4	0.418848	5.5409	0.0329325	CYP7B1, CYP7A1, CYP8B1, SLC27A5
BP	GO:0042149	cellular response to glucose starvation	8	0.837696	2.60748	0.0330161	NIM1K, SLC7A5, CHKA, SIK1, PLIN2, VLDLR, BHLHA15, GCK
BP	GO:0042632	cholesterol homeostasis	10	1.04712	2.23875	0.0345026	ABCG8, ABCG5, FABP4, CES1D, INSIG1, LRP5, TSPO, LPL, CYP7B1, CYP7A1
BP	GO:0007049	cell cycle	14	1.46597	1.89201	0.0345945	STEAP3, ANAPC15, DUSP1, EPB41, SRC, NEK6, USP2, KLHL21, G0S2, MAPK13, SIK1, AJUBA, CDKN3, TP73
BP	GO:0048812	neuron projection morphogenesis	9	0.942408	2.37467	0.035376	GPM6A, PAK1, WEE1, CTTN, EPB41L3, LIFR, PRICKLE1, THBS4, MAP4K4
BP	GO:0032956	regulation of actin cytoskeleton organization	10	1.04712	2.21636	0.0364644	PAK1, DAAM2, ABL1, ARHGEF19, ARHGAP18, RHOC, EPHA3, CCL27, RHOBTB1, RHOB
BP	GO:0038165	oncostatin-M-mediated signaling pathway	3	0.314136	9.49868	0.0366338	LIFR, OSMR, PRLR
BP	GO:0050427	3'-phosphoadenosine 5'-phosphosulfate metabolic process	3	0.314136	9.49868	0.0366338	SULT1C3, SULT1E1, SULT2A1
BP	GO:0031999	negative regulation of fatty acid beta-oxidation	3	0.314136	9.49868	0.0366338	PINK1, DBI, ACACB
BP	GO:0007096	regulation of exit from mitosis	3	0.314136	9.49868	0.0366338	CDKN1C, CDC14A, CDC14B
BP	GO:0046485	ether lipid metabolic process	3	0.314136	9.49868	0.0366338	NCEH1, PLAAT1, PLAAT3
BP	GO:0043547	positive regulation of GTPase activity	15	1.57068	1.81669	0.0376358	NTRK1, CCL21, CAV2, RGS16, ARHGEF19, ARAP1, ASAP2, VAV1, RGMA, PREX2, DOCK11, RASGEF1B, RALGPS1, MAP4K4, NDEL1
BP	GO:0010942	positive regulation of cell death	8	0.837696	2.53298	0.0378379	CDKN1A, CASP12, RGD1565355, AKR1C3, CCN2, PTGS2, KCNK2, DUSP6
BP	GO:0009750	response to fructose	4	0.418848	5.21496	0.0386842	SLC34A2, GCKR, PTGS2, SLC2A5
BP	GO:0030833	regulation of actin filament polymerization	6	0.628272	3.16623	0.0394237	FCHSD1, FCHSD2, CTTN, DAAM2, COTL1, ARHGAP18
BP	GO:0032465	regulation of cytokinesis	6	0.628272	3.16623	0.0394237	AHCTF1, PRC1, KLHL21, PDXP, CALM2, AURKA
BP	GO:0009888	tissue development	6	0.628272	3.16623	0.0394237	NTNG1, LAMA5, LAMB3, FASN, LAMC2, PRICKLE1
BP	GO:0051726	regulation of cell cycle	21	2.19895	1.60495	0.0398553	FOXA1, CDKL2, NUP214, INO80B, HSPA8, CDKN1A, CCNF, INHBA, GADD45G, PER2, CDK6, GRK5, CCNE2, CCNE1, FIGNL1, ABL1, TRIM36, DMAP1, RPRM, CDKN3, TP73
BP	GO:0030154	cell differentiation	34	3.56021	1.40853	0.0430529	FOXA1, GPSM1, THRA, SRC, FHL1, RORC, ASCL1, CHRDL1, HHEX, GNA12, CCN2, STX2, CCHCR1, CAMK2G, FGF21, NDEL1, NTRK1, MEF2C, SRMS, CAV2, VDR, SRD5A1, ARNT, SMAD6, DUSP6, RHOB, GADD45G, FGR, ELF3, PPDPF, ID1, SLC26A8, DHCR7, NGEF
BP	GO:0042574	retinal metabolic process	4	0.418848	4.92524	0.0449098	AKR1C1, ABCA4, AKR1C3, CYP1B1
BP	GO:0034097	response to cytokine	10	1.04712	2.13111	0.0450716	CD274, COL3A1, SOCS1, CCNE1, MMP2, LIFR, OSMR, PTGS2, EPHA3, CYP17A1
BP	GO:0051496	positive regulation of stress fiber assembly	7	0.732984	2.67492	0.0457261	PAK1, LIMK1, ABL1, CCN2, RHOC, PDLIM4, SORBS3
BP	GO:0072655	establishment of protein localization to mitochondrion	3	0.314136	8.31135	0.0474091	PINK1, TSPO, HK2
BP	GO:0051775	response to redox state	3	0.314136	8.31135	0.0474091	CLOCK, ADH5, NPAS2
BP	GO:0009134	nucleoside diphosphate catabolic process	3	0.314136	8.31135	0.0474091	ENTPD4, ENTPD7, ENTPD8
BP	GO:0006531	aspartate metabolic process	3	0.314136	8.31135	0.0474091	GOT1, ASPA, DDO
BP	GO:0044387	negative regulation of protein kinase activity by regulation of protein phosphorylation	3	0.314136	8.31135	0.0474091	DUSP10, DUSP26, CORO1C
BP	GO:0008654	phospholipid biosynthetic process	5	0.52356	3.57477	0.0490811	ISYNA1, PLAAT3, GPAT2, PLD1, PISD
BP	GO:0035050	embryonic heart tube development	5	0.52356	3.57477	0.0490811	HHEX, EDNRA, MEF2C, TMEM94, IFT122

## Sheet: CC (Old-CR vs Old)
Category	ID	Term	Count	%	Fold Enrichment	pvalue	Genes
CC	GO:0005737	cytoplasm	330	34.555	1.29426	2.00502e-08	CCNJ, CCNF, AQP7, ENO2, MKI67, CLDN1, PTPDC1, NAA80, LGALS3, MT2A, RPS6KA6, PEG12, PPP4R4, NAMPT, TRIM24, TRIM26, FBXO6, IER2, SULT2A1, MEF2C, SDS, MYO7B, PASK, FNDC1, BIN2, ETHE1, SIK1, CYP2E1, ATF5, CLOCK, ATF6, NGEF, ZFP622, GRB7, CRABP2, TERC, EPB41, PDGFB, DCUN1D2, GSKIP, PLA2G7, OAZ1, ADH5, NEU2, DYNC2LI1, LDHA, CRACR2B, FIGNL1, ST3GAL4, CYP2B1, TP53BP1, NRBF2, MYH7B, SRMS, CHKA, HOMER2, DN…
CC	GO:0043231	intracellular membrane-bounded organelle	84	8.79581	1.72657	1.16985e-06	CD86, ANKRD13B, AQP8, SDR9C7, CROT, CYP4A2, COMT, LITAF, HK2, CES2A, CASP12, CES2E, GM2A, CES2I, TSPO, CYP1B1, CCN2, RRP12, SYBU, ANKRD6, POLG, CBR1, MEF2C, G6PD, SPHK2, TAP1, ARAP1, LSS, IL17RB, SLC7A5, POR, RAB30, PPP1R3C, CTTN, TMBIM1, PPIF, CYP2E1, CLOCK, SLC27A5, CERS1, ITPR1, PRCP, ABCB9, NLRC4, PLD1, LTC4S, CYP7A1, DEPP1, CYP17A1, NEU2, CYP2C13, CYP2C12, CYP2C11, SNX25, CYP2B1, RGD1559459,…
CC	GO:0005829	cytosol	227	23.7696	1.30938	5.33258e-06	ENO2, SMC4, NAA80, LGALS3, AS3MT, PPP4R4, CCN2, FAAP100, SULT2A1, MEF2C, SDS, PASK, ATG13, CLPX, AKR1C12, RBP7, POR, PPP1R3C, AKR1C14, SIK1, ATF5, CLOCK, RIN2, EPHA3, GNE, ZFP622, GRB7, CRABP2, EPB41, OAZ1, ADH5, ADH6, NEU2, DYNC2LI1, LDHA, CMYA5, HMOX1, KCNN4, CHKA, HOMER2, RMDN2, PARP14, MOV10, GJB2, BHMT, AGO4, FASN, MAGED2, GTF2IRD1, CALM2, GSTM5, CDKN1A, AACS, AKR1B7, GYS2, SULT1C3, CASP12, …
CC	GO:0005811	lipid particle	17	1.7801	3.45613	2.98313e-05	PNPLA7, CHKA, CLSTN3, CAV2, OSBPL2, SIGMAR1, AQP7, LSS, PISD, SDR16C6, SCCPDH, FABP4, CES1D, PNPLA3, PNPLA5, PLIN2, METTL7A
CC	GO:0005789	endoplasmic reticulum membrane	60	6.28272	1.5566	0.000754386	GPSM1, CLSTN3, CYP4A2, ZDHHC2, JPH4, SCD2, ANXA7, CYP1B1, FLVCR2, NAT8B, RGD1564463, ELOVL5, SIGMAR1, TAP1, PLAAT3, CYP7B1, LSS, POR, CYP4F39, TYRO3, CYP2E1, ATF6, HPD, SLC27A5, CERS1, ZFP622, RETSAT, INSIG2, DERL3, INSIG1, EI24, ITPR1, ABCB9, PLD1, LTC4S, PTGS2, CYP7A1, CYP17A1, CYP3A9, CYP2C13, CYP2C12, CYP2C11, CYP2B1, HMOX1, SLC37A2, PNPLA7, SRD5A1, EDEM1, EPHX1, FMO1, CYP8B1, CYP2C7, ARMC10,…
CC	GO:0031012	extracellular matrix	25	2.6178	1.98961	0.00188351	LAMA5, LAMC2, LOXL1, THBS4, CPN2, LGALS3, ADAMTSL4, ADAMTS1, CCN2, LUM, MMP2, DCN, OTOGL, COL1A1, MMP12, MMP11, MARCO, COL3A1, LOX, OPTC, OGN, COL5A2, COL4A5, COL8A1, COL6A5
CC	GO:0000307	cyclin-dependent protein kinase holoenzyme complex	8	0.837696	4.36356	0.00206048	CDKN1A, CCNJ, CDK6, CCNE2, CCNE1, CCNF, CCNG1, CKS2
CC	GO:0005581	collagen trimer	9	0.942408	3.59409	0.00325427	COL1A1, FCNA, C1QA, MARCO, COL3A1, LOX, COL5A2, COL20A1, COL8A1
CC	GO:0005640	nuclear outer membrane	8	0.837696	3.97568	0.00356427	NUP214, RETSAT, SIGMAR1, RGD1559459, DHCR7, LTC4S, PTGS2, SYNE4
CC	GO:0005938	cell cortex	18	1.88482	2.16418	0.00415356	GPSM1, RYR1, EPB41, USP2, AQP7, LAMC2, RHOC, ENO2, GCK, TLE6, RHOBTB1, RHOB, GYS2, BIN2, CTTN, INSC, CCN2, CYTIP
CC	GO:0016020	membrane	191	20	1.18781	0.00555365	ADAMDEC1, AQP8, TMEM94, LOXL4, CYP4A2, ENO2, COMT, ZDHHC2, CDC14B, TGM1, ABHD13, KRTCAP3, EDNRA, NIPAL2, NIPAL3, CYP1B1, SLC25A43, SLC39A4, SLC25A47, SYBU, SLC16A4, SECTM1B, TMOD1, SLC34A2, ABCG5, PAQR4, SLC30A3, ENTPD4, USP2, ENTPD7, ENTPD8, TAP1, LIFR, PRLR, TMEM252, TMEM131, DISP1, TOM1L1, RAB32, PROCR, POR, TYRO3, CHMP4C, COL4A5, RAB38, CYP2E1, ATF6, CFB, NGEF, ABCG2, GPM6A, SLC45A3, CNP, RGD…
CC	GO:0043190	ATP-binding cassette (ABC) transporter complex	3	0.314136	22.3632	0.00580089	ABCG8, ABCG5, ABCB9
CC	GO:0005739	mitochondrion	83	8.6911	1.30165	0.0110092	MT-ND6, ALAS1, THRA, GLDC, AQP8, LRRK1, HK2, AKR1B7, RPS6KA6, KYNU, PDK4, ME1, TSPO, CYP1B1, SLC25A40, COA8, SULT4A1, SLC25A47, POLG, PHYH, HSDL2, SDS, SPHK2, MMP2, GPT2, ZFP217, PLAAT1, PLAAT3, ATG13, COQ10B, CLPX, PISD, RAB32, MRPL53, POR, HSH2D, NME6, POLG2, SNPH, ETHE1, GPD2, CRY2, CRY1, PPIF, RAB38, CYP2E1, GLS2, SRC, AK3, PPM1J, PPM1K, ACACB, ADH5, DEPP1, LDHA, MTHFD1L, PERP, NOCT, ABL1, GP…
CC	GO:0030176	integral component of endoplasmic reticulum membrane	12	1.25654	2.33355	0.0138585	SLC37A2, SCD, ELOVL5, DERL3, EDEM1, SCD2, ITPR1, TAP1, ABCB9, DHCR7, ATF6, SLC27A5
CC	GO:0016323	basolateral plasma membrane	22	2.30366	1.74465	0.0157188	SLC14A1, AABR07028997.1, SLC43A2, EPB41, AQP8, SLC16A12, PDGFB, AQP7, SLC16A10, ATP2B2, CLDN1, AURKA, SLC7A5, SLC22A25, SLC7A7, GM2A, ADORA1, STX2, SLC22A8, CD46, KCNN4, CNNM2
CC	GO:0005610	laminin-5 complex	3	0.314136	13.4179	0.0182107	LAMA5, LAMB3, LAMC2
CC	GO:0005884	actin filament	11	1.15183	2.32071	0.020137	TMOD1, GAS2L3, PAK1, CTTN, SRC, COTL1, MICAL2, ACKR2, MISP, GCK, CNN3
CC	GO:0002102	podosome	6	0.628272	3.7272	0.0210126	GSN, SH3PXD2A, CTTN, BIN2, SRC, ADAM8
CC	GO:0005783	endoplasmic reticulum	65	6.80628	1.30603	0.0231573	SRPX, CLSTN3, DBI, ZDHHC2, CES2A, CASP12, CES2E, RESP18, SCD2, ADORA1, TSPO, TOR3A, ELOVL5, SPHK2, SIGMAR1, PLAAT1, ATP11C, TAP1, PLAAT3, RGMA, CPED1, TPST2, RAB32, CTTN, TMBIM1, CYP2E1, ZP2, ATF6, HPD, SLC27A5, CERS1, CRABP2, INSIG2, INSIG1, EI24, ITPR1, LTC4S, PTGS2, THBS4, CYP17A1, PGRMC2, ABL1, HMOX1, RGD1559459, DNAJB9, METTL7A, PNPLA7, TMEM30B, CAV2, EDEM1, ABCA4, GDF1, ATP2B2, COL1A1, TSPO…
CC	GO:0043229	intracellular organelle	6	0.628272	3.53104	0.026019	OLR59, BIN2, HOMER2, LIMK1, CELA1, EEF2
CC	GO:0090575	RNA polymerase II transcription factor complex	12	1.25654	2.09655	0.0283272	HLF, DBP, THRA, NFIL3, VDR, MAFF, ARNT, ASCL1, ATF5, ATF6, BACH1, HIPK2
CC	GO:0043235	receptor complex	18	1.88482	1.75017	0.0294716	NTRK1, ABCG8, ABCG5, VDR, RGD1565355, EBI3, LRP5, LOXL4, LIFR, VLDLR, OSMR, PRLR, IL3RA, TYRO3, ROR1, TLR6, EPHA3, IL11RA1
CC	GO:0070160	occluding junction	5	0.52356	4.14134	0.0306126	CLDN5, CLDN1, TJP3, JAM2, JAM3
CC	GO:0016324	apical plasma membrane	29	3.03665	1.50123	0.0318341	AQP8, TCIRG1, PLD1, SLC2A5, CLDN1, ADGRG2, GM2A, KCNN4, LZTS1, MPDZ, TRPM6, SLC39A4, SLC34A2, SLC13A2, ABCG8, ABCG5, RGD1565355, IGFBP2, ATP2B2, LMO7, OSMR, SLC7A5, ADCY10, TRPV4, CD9, SLC22A8, KCNK2, TJP3, ABCG2
CC	GO:0097449	astrocyte projection	4	0.418848	5.59081	0.0321869	PINK1, GJB2, SLC1A2, KCNK2
CC	GO:0005615	extracellular space	90	9.42408	1.21613	0.0365433	CXCL9, LOXL4, CTSW, DBI, CXCL1, LAMC2, VLDLR, COMT, CXCL14, LOXL1, FCNA, LGALS3, IGHG1, PODNL1, EFEMP1, HYAL1, NAMPT, TCTN1, CCN2, RSPO1, IGFBP1, WFDC21, SPINK1, IGFBP4, RT1-N2, MMP2, GPT2, IGFBP2, MUP4, MUP5, DKK2, DCN, MMP12, MMP11, PROCR, LOX, NRG4, COL8A1, COL4A5, CDH13, ANGPTL4, CD46, GAS6, DIPK2A, CERS1, CFB, PLA1A, HBEGF, CFD, LAMA5, CNP, PDGFB, LPL, RT1-A2, AEBP1, PLA2G7, THBS4, CPN2, APO…
CC	GO:0031965	nuclear membrane	18	1.88482	1.67028	0.0429505	DUSP2, AHCTF1, RETSAT, EI24, ANXA4, OSBPL3, PRICKLE1, LTC4S, NAT8F3, EDNRA, PAK1, GRK5, SULT1E1, SCRN1, CLCA2, ACKR2, LPIN1, EPHA3
CC	GO:0005576	extracellular region	56	5.86387	1.2766	0.047868	LOXL4, LITAF, CHRDL1, LGALS3, ADAMTSL4, ADAMTS1, SPINK1L, NRCAM, CCN2, WFDC21, IGFBP4, MMP2, IGFBP2, MUP5, DCN, MMP11, FNDC1, LOX, CEACAM4, CRY2, COL6A5, ANGPTL4, CD46, GAS6, DIPK2A, ZP2, CFAP53, C1QA, PKDCC, RUP2, PDGFB, DPT, CD99L2, AEBP1, A1BG, FBLN2, THBS4, NPTX2, IL11RA1, IL33, GSN, GDF15, DNASE2B, REG4, INHBA, PRSS36, COL1A1, MFAP4, CXCL10, ADCY10, IL7, TTLL1, COL20A1, CD9, HAMP, CCL27
CC	GO:0015629	actin cytoskeleton	18	1.88482	1.64301	0.0487883	CD274, SVIL, GAS2L3, GSN, MYO7B, PDXP, SRCIN1, CIT, CNN3, CORO1C, FGR, ARHGAP21, ABLIM3, ABL1, KNTC1, VILL, PDLIM4, EPHA3
CC	GO:0032391	photoreceptor connecting cilium	6	0.628272	2.98176	0.049211	TTC8, RP1, TMEM237, CETN3, LCA5, IFT122

## Sheet: MF (Old-CR vs Old)
Category	ID	Term	Count	%	Fold Enrichment	pvalue	Genes
MF	GO:0016491	oxidoreductase activity	25	2.6178	3.10264	1.65455e-06	ADH5, AKR1B7, ADH6, CYP3A9, AKR7A3, CYP2C11, AOX3, AOX1, CYP1B1, DHRS7L1, HAO2, CBR1, HSDL2, SRD5A1, AKR1C3, AKR1C2, MICAL2, LOC306766, POR, SCCPDH, SCD, AKR1C14, FASN, CYP1A2, CYP2E1
MF	GO:0005506	iron ion binding	24	2.51309	2.80426	1.53793e-05	CYP4A2, CYP7B1, CYP8B1, CYP7A1, CYP17A1, CYP3A9, CYP2C13, CYP4F17, CYP4F39, CYP2C24, CYP2C7, CYP2C12, CYP2C11, SCD, ETHE1, CYP1A2, RIOX2, AOX3, CYP2B1, SCD2, AOX1, CYP1B1, CYP2E1, HPD
MF	GO:0004497	monooxygenase activity	15	1.57068	3.92262	2.3663e-05	FMO1, MICAL2, CYP4A2, CYP7B1, CYP17A1, CYP3A9, CYP2C13, CYP4F17, CYP4F39, CYP2C7, CYP2C12, CYP2C11, CYP1A2, CYP1B1, CYP2E1
MF	GO:0020037	heme binding	23	2.40838	2.74583	3.34656e-05	SRC, HBB-BS, CYP4A2, CYP7B1, PTGS2, CYP8B1, CYP7A1, CYP17A1, CYP3A9, CYP2C13, CYP4F17, CYP4F39, CYP2C24, PGRMC2, CYP2C7, CYP2C12, CYP2C11, CYP1A2, CYP2B1, HMOX1, CYP1B1, FLVCR2, CYP2E1
MF	GO:0017018	myosin phosphatase activity	13	1.36126	4.32677	3.68016e-05	DUSP2, DUSP1, PDXP, PPM1J, DUSP8, DUSP26, CDC14A, DUSP6, CDC14B, PPP2CA, DUSP10, CTDSP2, CDKN3
MF	GO:0047834	D-threo-aldose 1-dehydrogenase activity	8	0.837696	7.64058	5.06021e-05	AKR1C12, AKR7A3, AKR1C1, AKR1C14, AKR1C3, AKR1C2, GCLM, AKR1B7
MF	GO:0016705	oxidoreductase activity, acting on paired donors, with incorporation or reduction of molecular oxygen	11	1.15183	4.09548	0.000296438	CYP2C13, CYP4F17, CYP4F39, CYP2C7, CYP2C12, CYP2C11, CYP1B1, CYP4A2, CYP2E1, CYP7B1, CYP17A1
MF	GO:0016712	oxidoreductase activity, acting on paired donors, with incorporation or reduction of molecular oxygen, reduced flavin or flavoprotein as one donor, and incorporation of one atom of oxygen	10	1.04712	4.48299	0.000317272	CYP3A9, CYP2C13, CYP2C24, CYP2C7, CYP2C12, CYP2C11, CYP1A2, CYP2B1, CYP1B1, CYP2E1
MF	GO:0008395	steroid hydroxylase activity	10	1.04712	4.30719	0.000433199	CYP3A9, CYP2C13, CYP2C24, CYP2C7, CYP2C12, CYP2C11, CYP2B1, CYP2E1, CYP7B1, CYP7A1
MF	GO:0070330	aromatase activity	9	0.942408	4.70714	0.000526128	CYP3A9, CYP2C13, CYP2C7, CYP2C12, CYP2C11, CYP1A2, CYP2B1, CYP1B1, CYP2E1
MF	GO:0005524	ATP binding	93	9.73822	1.39542	0.000875593	RYR1, ABCD2, LRRK1, SMC4, AACS, HK2, RPS6KA6, NMRK1, PDK4, TLK1, CDKL2, MAP2K3, ABCG8, TOR3A, ABCG5, ENTPD4, DCAKD, DDX11, ENTPD7, MYO7B, ENTPD8, ATP11C, TAP1, CHD1L, MAT1A, PASK, KIF6, CLPX, CIT, FGR, ACLY, NME6, TYRO3, ROR1, MVD, SIK1, SLC27A5, EPHA3, GNE, ABCG2, NIM1K, AABR07028997.1, PKDCC, UBA7, DNAH8, SRC, AK3, ABCB9, NLRC4, ACACB, PAPSS1, AURKA, PAK1, MTHFD1L, GRK5, STK35, LOC314140, FIGNL…
MF	GO:0004721	phosphoprotein phosphatase activity	10	1.04712	3.8538	0.00100468	DUSP2, DUSP10, PPP1R3C, DUSP1, CTDSP2, PDXP, PPM1K, DUSP8, DUSP26, DUSP6
MF	GO:0047086	ketosteroid monooxygenase activity	5	0.52356	9.98485	0.00108308	AKR1C12, AKR1C1, AKR1C14, AKR1C3, AKR1C2
MF	GO:0008330	protein tyrosine/threonine phosphatase activity	5	0.52356	9.98485	0.00108308	DUSP2, DUSP10, DUSP1, DUSP8, DUSP6
MF	GO:0004032	alditol:NADP+ 1-oxidoreductase activity	6	0.628272	6.93684	0.00130961	AKR1C12, AKR1C1, AKR1C14, AKR1C3, AKR1C2, AKR1B7
MF	GO:0008392	arachidonic acid epoxygenase activity	7	0.732984	5.3023	0.00167764	CYP2C13, CYP2C24, CYP2C7, CYP2C12, CYP2C11, CYP2B1, CYP2E1
MF	GO:0017017	MAP kinase tyrosine/serine/threonine phosphatase activity	5	0.52356	7.84524	0.00294545	DUSP2, DUSP10, DUSP1, DUSP8, DUSP6
MF	GO:0005536	glucose binding	5	0.52356	7.84524	0.00294545	GYS2, G6PD, GALT, GCK, HK2
MF	GO:0001222	transcription corepressor binding	9	0.942408	3.53036	0.00362047	PER2, PER1, PER3, BCL6, NEK6, ZBTB16, LCOR, ESR1, TP73
MF	GO:0016655	oxidoreductase activity, acting on NAD(P)H, quinone or similar compound as acceptor	4	0.418848	10.9833	0.00441603	CBR1, AKR1C1, AKR1C3, AKR1C2
MF	GO:0016829	lyase activity	6	0.628272	5.272	0.0047737	ACLY, GLDC, FASN, MOCOS, CRY2, CYP1A2
MF	GO:0016229	steroid dehydrogenase activity	5	0.52356	6.86458	0.00498083	AKR1C12, AKR1C1, AKR1C14, AKR1C3, AKR1C2
MF	GO:0008146	sulfotransferase activity	8	0.837696	3.73901	0.00503121	SULT1C3, NDST2, TPST2, SULT1C2, SULT1E1, RGD1559960, SULT4A1, SULT2A1
MF	GO:0018636	phenanthrene 9,10-monooxygenase activity	3	0.314136	21.9667	0.00600719	AKR1C1, AKR1C3, AKR1C2
MF	GO:0004062	aryl sulfotransferase activity	4	0.418848	9.76296	0.0064016	SULT1C3, SULT1C2, SULT1E1, RGD1559960
MF	GO:0033550	MAP kinase tyrosine phosphatase activity	4	0.418848	9.76296	0.0064016	DUSP2, DUSP10, DUSP1, DUSP6
MF	GO:0047023	androsterone dehydrogenase activity	4	0.418848	9.76296	0.0064016	AKR1C1, AKR1C14, AKR1C3, AKR1C2
MF	GO:0042626	ATPase activity, coupled to transmembrane movement of substances	8	0.837696	3.51467	0.00710691	ABCG8, ABCD2, ABCG5, AABR07028997.1, ABCA4, TAP1, ABCB9, ABCG2
MF	GO:0004725	protein tyrosine phosphatase activity	12	1.25654	2.55922	0.00711191	PPP2CA, DUSP2, DUSP10, DUSP1, PTPRN, DUSP8, DUSP26, CDC14A, DUSP6, PTPDC1, CDKN3, CDC14B
MF	GO:0019901	protein kinase binding	40	4.18848	1.54152	0.00743773	GRB7, CDKN1A, CCNT1, SRC, CCNF, HSPB1, GSKIP, IRS2, RHOBTB1, AURKA, PPP2CA, PAK1, SOCS1, TRIM5, ABL1, MAP2K6, MAP2K3, CAV2, NEK6, UNC5C, RHOC, EEF2, SRCIN1, PRLR, ATG13, ESR1, CIT, RHOB, TOM1L1, FGR, CCNE2, CCNE1, PRC1, TRPV4, CRY2, CKS2, CRY1, SIK1, CALM2, TP73
MF	GO:0042802	identical protein binding	108	11.3089	1.25259	0.0101754	STEAP3, SAT2, ENO2, CLDN1, TGM1, AKR7A3, NAMPT, SLC39A4, PSPH, ZBP1, G6PD, HGD, USP2, MAT1A, BHLHA15, CLDN5, POLG2, ETHE1, KCTD13, ATF6, KCTD15, ABCG2, GRB7, PDGFB, ITPR1, AK3, UAP1, ACACB, ADH5, GJC3, LDHA, CMYA5, HMOX1, A2M, HAO2, MAP2K6, CD276, PRRT1, GSTM3, CHKA, HOMER2, ZBTB16, CBX1, INHBA, SMAD6, ESR1, GADD45G, COL1A1, GJB2, BHMT, BMP1, BCL6, TRPV4, FASN, RIOX2, ID1, ALDH18A1, RAD18, GSTM5,…
MF	GO:0016538	cyclin-dependent protein serine/threonine kinase regulator activity	6	0.628272	4.39333	0.0106209	CCNJ, CCNE2, CCNT1, CCNE1, CCNF, CCNG1
MF	GO:0030170	pyridoxal phosphate binding	8	0.837696	3.25432	0.0107832	ALAS1, SDS, GOT1, GLDC, GPT2, KYNU, MOCOS, ETNPPL
MF	GO:0034988	Fc-gamma receptor I complex binding	3	0.314136	16.475	0.0116525	FGR, LGALS3, IGHG1
MF	GO:0015265	urea channel activity	3	0.314136	16.475	0.0116525	SLC14A1, AQP8, AQP7
MF	GO:0032052	bile acid binding	4	0.418848	7.98788	0.0117471	AKR1C1, AKR1C14, AKR1C3, AKR1C2
MF	GO:0008970	phosphatidylcholine 1-acylhydrolase activity	4	0.418848	7.98788	0.0117471	PLAAT1, LPL, PLAAT3, PLA1A
MF	GO:0042803	protein homodimerization activity	48	5.02618	1.42873	0.012498	NAA60, ABCD2, THRA, PDGFB, HSPB1, LPL, PDXP, ABCB9, NLRC4, PTGS2, ZDHHC2, PAPSS1, TYMP, HHEX, MTHFD1L, TRIM5, KYNU, LOC314140, AOX3, HMOX1, AOX1, CAMK2G, PDLIM4, PSPH, JAM3, NTRK1, G6PD, SDS, HMGCS1, CHKA, PRMT2, GDF15, CAV2, ZBTB16, ZBTB38, ARNT, TAP1, TPD52L1, NR0B2, TPST2, GALE, CHMP4C, CRYL1, CDH13, MVD, HPD, GSTM5, ABCG2
MF	GO:0008168	methyltransferase activity	8	0.837696	3.1381	0.0130655	BHMT, AS3MT, MGMT, SMYD4, MTR, DMAP1, METTL7A, TRMT11
MF	GO:0004806	triglyceride lipase activity	5	0.52356	5.23016	0.013679	CES1D, PNPLA3, LPL, PNPLA5, PLA1A
MF	GO:0030332	cyclin binding	6	0.628272	3.99394	0.0158214	CDKN1A, CDK6, MDFIC, CRABP2, USP2, FBXO31
MF	GO:0005518	collagen binding	9	0.942408	2.74583	0.0162128	MMP12, PAK1, LOX, LUM, PDGFB, AEBP1, DCN, THBS4, ITGA9
MF	GO:0008083	growth factor activity	14	1.46597	2.07793	0.017542	GDF10, GDF15, PDGFB, GDF1, CXCL1, INHBA, THBS4, EFEMP1, IL7, OGN, CCN2, GAS6, FGF21, HBEGF
MF	GO:0004720	protein-lysine 6-oxidase activity	3	0.314136	13.18	0.018838	LOX, LOXL4, LOXL1
MF	GO:0031406	carboxylic acid binding	4	0.418848	6.75897	0.0190284	PHYH, GOT1, AKR1C1, AKR1C2
MF	GO:0000287	magnesium ion binding	19	1.98953	1.77603	0.021713	NIM1K, NEK6, PDXP, ATP11C, MAT1A, COMT, ENO2, GCK, GEM, ADCY10, PINK1, WEE1, RPS6KA6, FIGNL1, LOC314140, ME1, ABL1, SIK1, PSPH
MF	GO:0008138	protein tyrosine/serine/threonine phosphatase activity	6	0.628272	3.66111	0.0224889	DUSP1, DUSP26, CDC14A, DUSP6, CDKN3, CDC14B
MF	GO:0008009	chemokine activity	6	0.628272	3.56216	0.0250602	CXCL10, CXCL9, CCL21, CXCL1, CXCL14, CCL27
MF	GO:0101020	estrogen 16-alpha-hydroxylase activity	3	0.314136	10.9833	0.0274125	CYP3A9, CYP1A2, CYP1B1
MF	GO:0008142	oxysterol binding	3	0.314136	10.9833	0.0274125	INSIG2, INSIG1, RORC
MF	GO:0004923	leukemia inhibitory factor receptor activity	3	0.314136	10.9833	0.0274125	LIFR, OSMR, PRLR
MF	GO:0008080	N-acetyltransferase activity	5	0.52356	4.22436	0.0285824	NAT8F4, NAT8F3, NAT8B, SAT2, NAA80
MF	GO:0005201	extracellular matrix structural constituent	8	0.837696	2.62289	0.0320421	COL1A1, LAMA5, COL3A1, LAMB3, COL5A2, COL8A1, COL4A5, DPT
MF	GO:0051287	NAD binding	8	0.837696	2.62289	0.0320421	LDHA, AHCY, AOX3, ALDH1A1, ME1, AOX1, PHGDH, ALDH1A7
MF	GO:0004722	protein serine/threonine phosphatase activity	7	0.732984	2.90126	0.0324154	PPP2CA, DUSP1, PPM1J, PPM1K, CDC14A, CDKN3, CDC14B
MF	GO:0004712	protein serine/threonine/tyrosine kinase activity	23	2.40838	1.5938	0.0327848	NTRK1, NEK8, CDKL2, SRMS, SRC, NEK6, LIMK1, LRRK1, AURKA, CIT, MAPK13, FGR, PINK1, WEE1, PAK1, RPS6KA6, SBK1, ABL1, TYRO3, SIK1, CAMK2G, TRPM6, EPHA3
MF	GO:0016410	N-acyltransferase activity	4	0.418848	5.49167	0.0336813	GLYATL2, PLAAT1, PLAAT3, CERS1
MF	GO:0052740	1-acyl-2-lysophosphatidylserine acylhydrolase activity	3	0.314136	9.41429	0.0372351	PLAAT1, LPL, PLAAT3
MF	GO:0052739	phosphatidylserine 1-acylhydrolase activity	3	0.314136	9.41429	0.0372351	PLAAT1, LPL, PLAAT3
MF	GO:0051015	actin filament binding	18	1.88482	1.67542	0.0416058	TMOD1, SVIL, MYH7B, GAS2L3, GSN, MYO7B, EEF2, CNN3, CORO1C, ABLIM3, CTTN, TRPV4, COTL1, ABL1, ANXA8, VILL, AJUBA, MISP
MF	GO:0036094	small molecule binding	8	0.837696	2.47512	0.0420369	LOX, HMGCS1, VDR, FASN, MUP4, MUP5, MALT1, LOC298111
MF	GO:0004715	non-membrane spanning protein tyrosine kinase activity	6	0.628272	3.06512	0.0443944	FGR, WEE1, PKDCC, SRMS, SRC, ABL1
MF	GO:0031995	insulin-like growth factor II binding	3	0.314136	8.2375	0.0481747	IGFBP1, IGFBP4, IGFBP2
MF	GO:0047376	all-trans-retinyl-palmitate hydrolase, all-trans-retinol forming activity	3	0.314136	8.2375	0.0481747	CES2A, CES2E, CES1D
MF	GO:0071949	FAD binding	6	0.628272	2.99545	0.048289	AOX3, CRY2, CRY1, MICAL2, AOX1, DDO
MF	GO:0004674	protein serine/threonine kinase activity	25	2.6178	1.4923	0.0489424	NIM1K, LRRK1, AURKA, RPS6KA6, PAK1, GRK5, STK35, TLK1, CAMK2G, TRPM6, HTATIP2, MAP4K4, MAP2K6, MAP2K3, NEK8, NEK6, LIMK1, MOK, PASK, MAPK13, HIPK2, CIT, PINK1, SBK1, SIK1

## Sheet: KEGG (Old-CR vs Old)
Category	ID	Term	Count	%	Fold Enrichment	p-value	Genes
KEGG	rno01100	Metabolic pathways	128	13.4031	1.6097	8.48826e-09	MT-ND6, GLDC, GDA, SAT2, CYP4A2, ENO2, COMT, NDST2, NAMPT, PSPH, G6PD, SDS, HGD, ENTPD4, GPT2, ENTPD8, MAT1A, PISD, ACLY, ETHE1, CYP2E1, HPD, SLC27A5, GNE, ISYNA1, NNMT, UAP1, PLD1, PLA2G7, ACACB, FUT1, ADH5, ADH6, NEU2, CYP2C13, LDHA, CYP2C12, CYP2C11, ST3GAL4, CYP2B1, HMOX1, RGD1559459, HAO2, GSTM3, CHKA, GOT1, SRD5A1, ST8SIA1, SETD1B, ADCY10, BHMT, CYP2C24, CYP2C7, FASN, CYP1A2, CRYL1, ALDH18A…
KEGG	rno00140	Steroid hormone biosynthesis	19	1.98953	4.57114	1.00368e-07	SRD5A1, AKR1C1, AKR1C3, COMT, CYP7B1, CYP7A1, CYP17A1, CYP3A9, CYP2C13, CYP2C24, CYP2C7, CYP2C12, SULT1E1, CYP2C11, CYP1A2, CYP2B1, CYP1B1, RGD1559459, CYP2E1
KEGG	rno05204	Chemical carcinogenesis - DNA adducts	17	1.7801	4.52049	6.6896e-07	CBR1, GSTM3, EPHX1, PTGS2, CYP3A9, CYP2C13, GSTA6, CYP2C24, CYP2C7, CYP2C12, CYP2C11, CYP1A2, CYP1B1, RGD1559459, CYP2E1, GSTM5, SULT2A1
KEGG	rno00830	Retinol metabolism	17	1.7801	3.94893	4.42739e-06	RETSAT, CYP4A2, ADH5, ADH6, CYP3A9, CYP2C13, CYP2C24, CYP2C7, CYP2C12, CYP2C11, CYP1A2, AOX3, ALDH1A1, CYP2B1, AOX1, RGD1559459, ALDH1A7
KEGG	rno03320	PPAR signaling pathway	16	1.67539	3.75986	1.71772e-05	HMGCS1, GK, RGD1565355, AQP7, LPL, DBI, CYP4A2, CYP8B1, CYP7A1, FABP4, SCD, ME1, SCD2, PLIN2, ANGPTL4, SLC27A5
KEGG	rno04710	Circadian rhythm	10	1.04712	5.9439	2.79577e-05	PER2, PER1, PER3, DBP, NFIL3, CRY2, RORC, CRY1, CLOCK, NPAS2
KEGG	rno00980	Metabolism of xenobiotics by cytochrome P450	14	1.46597	3.72276	7.69277e-05	CBR1, GSTM3, AKR1C1, EPHX1, ADH5, ADH6, GSTA6, AKR7A3, CYP1A2, CYP1B1, RGD1559459, CYP2E1, GSTM5, SULT2A1
KEGG	rno00591	Linoleic acid metabolism	9	0.942408	4.54708	0.000631244	CYP3A9, CYP2C13, CYP2C24, CYP2C7, CYP2C12, CYP2C11, CYP1A2, PLAAT3, CYP2E1
KEGG	rno04115	p53 signaling pathway	12	1.25654	3.23348	0.00105209	CDKN1A, STEAP3, CDK6, CCNE2, CCNE1, PERP, EI24, ZFP385A, CCNG1, RPRM, TP73, GADD45G
KEGG	rno04750	Inflammatory mediator regulation of TRP channels	15	1.57068	2.63599	0.00153164	MAP2K3, NTRK1, SRC, ITPR1, CYP4A2, MAPK13, CYP2C13, CYP2C24, CYP2C7, CYP2C12, CYP2C11, TRPV4, CAMK2G, CALM2, MAP2K6
KEGG	rno00590	Arachidonic acid metabolism	12	1.25654	2.99396	0.00199654	CBR1, CYP2C13, CYP2C24, CYP2C7, CYP2C12, CYP2C11, CYP2B1, PLAAT3, CYP4A2, CYP2E1, LTC4S, PTGS2
KEGG	rno01200	Carbon metabolism	15	1.57068	2.54738	0.00212622	G6PD, SDS, GOT1, GLDC, GPT2, ENO2, GCK, HK2, ADH5, LOC314140, ME1, PHGDH, ALDOC, HAO2, PSPH
KEGG	rno00350	Tyrosine metabolism	8	0.837696	4.25458	0.0022732	GOT1, HGD, AOX3, AOX1, COMT, HPD, ADH5, ADH6
KEGG	rno00982	Drug metabolism - cytochrome P450	11	1.15183	3.04523	0.00295686	GSTM3, GSTA6, AOX3, CYP1A2, RGD1559459, FMO1, AOX1, CYP2E1, ADH5, GSTM5, ADH6
KEGG	rno00270	Cysteine and methionine metabolism	9	0.942408	3.56634	0.00325017	BHMT, LDHA, AHCY, SDS, GOT1, PHGDH, MTR, MAT1A, GCLM
KEGG	rno01230	Biosynthesis of amino acids	11	1.15183	2.85002	0.0048107	SDS, GOT1, LOC314140, GPT2, PHGDH, MTR, ALDOC, MAT1A, ALDH18A1, ENO2, PSPH
KEGG	rno04976	Bile secretion	12	1.25654	2.5799	0.0064088	ABCG8, ABCG5, NCEH1, AQP8, EPHX1, RGD1559459, SLC22A8, CYP7A1, NR0B2, SLC27A5, SULT2A1, ABCG2
KEGG	rno00983	Drug metabolism - other enzymes	12	1.25654	2.50011	0.00809299	CES2A, GSTM3, GSTA6, CES2E, NME6, TPMT, CES1D, RGD1559459, UPP2, CYP2E1, GSTM5, TYMP
KEGG	rno04979	Cholesterol metabolism	8	0.837696	3.23348	0.010826	ABCG8, ABCG5, NCEH1, RGD1565355, TSPO, LPL, ANGPTL4, CYP7A1
KEGG	rno04974	Protein digestion and absorption	12	1.25654	2.35448	0.0124753	COL1A1, KCNK5, COL3A1, SLC7A7, COL5A2, COL20A1, COL8A1, COL4A5, SLC16A10, PRCP, COL6A5, KCNN4
KEGG	rno05222	Small cell lung cancer	11	1.15183	2.41632	0.0149806	LAMA5, CDKN1A, CDK6, CCNE2, LAMB3, CCNE1, CKS2, COL4A5, LAMC2, PTGS2, GADD45G
KEGG	rno05418	Fluid shear stress and atherosclerosis	15	1.57068	2.00754	0.017026	GSTM3, NQO1, MEF2C, CAV2, DUSP1, SRC, MMP2, PDGFB, MAPK13, GSTA6, TRPV4, HMOX1, CALM2, GSTM5, MAP2K6
KEGG	rno04978	Mineral absorption	8	0.837696	2.83639	0.0213627	SLC34A2, MT2A, VDR, HMOX1, ATP2B2, MT1, TRPM6, SLC39A4
KEGG	rno04512	ECM-receptor interaction	10	1.04712	2.29651	0.0291162	COL1A1, LAMA5, FRAS1, LAMB3, RGD1565355, COL4A5, LAMC2, COL6A5, THBS4, ITGA9
KEGG	rno04917	Prolactin signaling pathway	9	0.942408	2.42511	0.0309555	GALT, SOCS1, CISH, SRC, ESR1, PRLR, GCK, MAPK13, CYP17A1
KEGG	rno04912	GnRH signaling pathway	10	1.04712	2.24547	0.0330462	MAP2K3, SRC, MMP2, ITPR1, PLD1, CAMK2G, CALM2, MAPK13, HBEGF, MAP2K6
KEGG	rno01250	Biosynthesis of nucleotide sugars	6	0.628272	3.27718	0.0339881	GALE, GALT, UAP1, GCK, HK2, GNE
KEGG	rno04936	Alcoholic liver disease	13	1.36126	1.94608	0.0345647	MAP2K3, C1QA, CXCL1, ACACB, ADH5, MAPK13, ADH6, SCD, FASN, SCD2, CYP2E1, LPIN1, MAP2K6
KEGG	rno05200	Pathways in cancer	37	3.87435	1.38986	0.0382834	LAMA5, CDKN1A, TERC, LRP5, PDGFB, LAMC2, PLD1, PTGS2, EDNRA, PEG12, GNA12, ABL1, HMOX1, CAMK2G, FGF21, RUNX1T1, NTRK1, GSTM3, NQO1, LAMB3, ZBTB16, MMP2, FZD8, ARNT, ESR1, GADD45G, GSTA6, CDK6, CCNE2, CCNE1, IL7, LPAR6, IL3RA, CKS2, COL4A5, CALM2, GSTM5
KEGG	rno05208	Chemical carcinogenesis - reactive oxygen species	19	1.98953	1.64092	0.0404307	MT-ND6, CBR1, GSTM3, NQO1, SRC, AKR1C1, EPHX1, ARNT, PLD1, MAPK13, GSTA6, AS3MT, CYP1A2, PPIF, ABL1, HMOX1, CYP1B1, CYP2E1, GSTM5
KEGG	rno00260	Glycine, serine and threonine metabolism	6	0.628272	3.10912	0.0414608	BHMT, ALAS1, SDS, GLDC, PHGDH, PSPH
KEGG	rno04060	Cytokine-cytokine receptor interaction	21	2.19895	1.56603	0.04692	GDF10, IL33, CXCL9, TNFRSF12A, CCL21, GDF15, EBI3, GDF1, LIFR, CXCL1, INHBA, OSMR, PRLR, CXCL14, IL17RB, CXCL10, IL7, IL3RA, TNFRSF21, CCL27, IL11RA1
KEGG	rno00601	Glycosphingolipid biosynthesis - lacto and neolacto series	5	0.52356	3.60879	0.0469549	ST8SIA1, ST3GAL4, GCNT2, B3GNT2, FUT1

## Sheet: Reactome (Old-CR vs Old)
Category	ID	Term	Count	%	Fold Enrichment	pvalue	Genes
Reactome	R-RNO-1430728	Metabolism	124	12.9843	1.56169	3.9856e-08	N6AMT1, MT-ND6, TPMT, ENO2, COMT, NDST2, AS3MT, AKR7A3, NAMPT, PDK4, CYP1B1, PSPH, SULT2A1, PHYH, G6PD, SDS, STARD6, ENTPD4, ENTPD8, MAT1A, ACLY, PPP1R3C, AKR1C14, ETHE1, GPD2, CYP2E1, HPD, SLC27A5, ABCG2, PLA1A, ISYNA1, NNMT, ITPR1, LPL, PLD1, OAZ1, FUT1, ADH5, ADH6, LDHA, ST3GAL4, HMOX1, RGD1559459, HAO2, GCKR, CHKA, GOT1, VDR, SRD5A1, OSBPL3, OSBPL2, EPHX1, ACSF2, BHMT, FASN, OGN, CYP1A2, CRYL…
Reactome	R-RNO-156581	Methylation	9	0.942408	12.3201	9.08893e-08	N6AMT1, AS3MT, AHCY, NNMT, TPMT, CYP1A2, MTR, MAT1A, COMT
Reactome	R-RNO-211859	Biological oxidations	28	2.93194	3.15368	1.47328e-07	N6AMT1, AHCY, NNMT, TPMT, MTR, COMT, CYP7A1, ADH5, ADH6, AS3MT, AKR7A3, SULT1E1, CYP1B1, RGD1559459, SULT4A1, SULT2A1, EPHX1, ARNT, FMO1, MAT1A, CYP7B1, GSTA6, CES1D, CYP1A2, ALDH1A1, CYP2E1, GCLM, GSTM5
Reactome	R-RNO-156580	Phase II - Conjugation of compounds	16	1.67539	3.55915	2.97849e-05	N6AMT1, AHCY, NNMT, TPMT, MTR, MAT1A, COMT, GSTA6, AS3MT, SULT1E1, CYP1A2, RGD1559459, GCLM, SULT4A1, GSTM5, SULT2A1
Reactome	R-RNO-8957322	Metabolism of steroids	18	1.88482	3.14043	4.38075e-05	STARD6, HMGCS1, VDR, SRD5A1, AKR1C1, OSBPL3, OSBPL2, AKR1C3, CYP7B1, LSS, CYP7A1, AKR1B7, CYP17A1, AKR1C14, TSPO, MVD, DHCR7, SLC27A5
Reactome	R-RNO-192105	Synthesis of bile acids and bile salts	8	0.837696	6.18983	0.000184031	AKR1C1, AKR1C14, OSBPL3, OSBPL2, AKR1C3, CYP7B1, CYP7A1, SLC27A5
Reactome	R-RNO-556833	Metabolism of lipids	47	4.92147	1.72454	0.000239657	DBI, CROT, PLD1, PTGS2, LTC4S, CYP7A1, AACS, AKR1B7, CYP17A1, GM2A, CYP1B1, TSPO, GPAT2, HAO2, CBR1, PHYH, STARD6, HMGCS1, CHKA, GK, ELOVL5, VDR, SPHK2, SRD5A1, AKR1C1, OSBPL3, OSBPL2, PLAAT1, AKR1C3, PLAAT3, CYP7B1, LSS, ACSF2, ACLY, SCD, AKR1C14, GPD2, FASN, CYP1A2, PNPLA3, PNPLA5, MVD, CYP2E1, DHCR7, SLC27A5, CERS1, PLA1A
Reactome	R-RNO-194068	Bile acid and bile salt metabolism	8	0.837696	4.31412	0.00197256	AKR1C1, AKR1C14, OSBPL3, OSBPL2, AKR1C3, CYP7B1, CYP7A1, SLC27A5
Reactome	R-RNO-211945	Phase I - Functionalization of compounds	12	1.25654	2.96596	0.00203364	CES1D, EPHX1, CYP1A2, ALDH1A1, CYP1B1, FMO1, ARNT, CYP2E1, CYP7B1, CYP7A1, ADH5, ADH6
Reactome	R-RNO-193368	Synthesis of bile acids and bile salts via 7alpha-hydroxycholesterol	6	0.628272	5.93192	0.00251281	AKR1C1, AKR1C14, AKR1C3, CYP7B1, CYP7A1, SLC27A5
Reactome	R-RNO-193807	Synthesis of bile acids and bile salts via 27-hydroxycholesterol	5	0.52356	7.4149	0.0033533	AKR1C1, AKR1C14, AKR1C3, CYP7B1, CYP7A1
Reactome	R-RNO-9748784	Drug ADME	12	1.25654	2.73781	0.00387458	GSTA6, TPMT, SULT1E1, CES1D, AKR1C1, AKR1C14, AKR1C3, RGD1559459, CYP2E1, SLC28A2, SULT2A1, ABCG2
Reactome	R-RNO-69236	G1 Phase	8	0.837696	3.74647	0.00457773	PPP2CA, CDKN1C, CDKN1A, CDK6, CCNE2, SRC, ABL1, MNAT1
Reactome	R-RNO-69231	Cyclin D associated events in G1	8	0.837696	3.74647	0.00457773	PPP2CA, CDKN1C, CDKN1A, CDK6, CCNE2, SRC, ABL1, MNAT1
Reactome	R-RNO-2243919	Crosslinking of collagen fibrils	5	0.52356	6.84452	0.00463192	COL1A1, BMP1, LOX, LOXL4, LOXL1
Reactome	R-RNO-5625900	RHO GTPases activate CIT	4	0.418848	10.169	0.00516029	PRC1, RHOC, RHOB, CIT
Reactome	R-RNO-1614635	Sulfur amino acid metabolism	6	0.628272	5.0845	0.00519395	BHMT, AHCY, ETHE1, FMO1, MTR, MAT1A
Reactome	R-RNO-2022090	Assembly of collagen fibrils and other multimeric structures	7	0.732984	4.15234	0.00561063	COL1A1, COL3A1, BMP1, LOX, LOXL4, COL8A1, LOXL1
Reactome	R-RNO-193775	Synthesis of bile acids and bile salts via 24-hydroxycholesterol	4	0.418848	7.90922	0.0113856	AKR1C1, AKR1C14, AKR1C3, SLC27A5
Reactome	R-RNO-71387	Metabolism of carbohydrates	21	2.19895	1.78809	0.0129535	G6PD, GCKR, GALT, GOT1, LUM, ENO2, FUT1, GCK, HK2, DCN, NDST2, PPP1R3C, HYAL1, LOC314140, OGN, ALDH1A1, ST3GAL4, CRYL1, B3GNT2, ALDOC, CALM2
Reactome	R-RNO-109582	Hemostasis	35	3.66492	1.50811	0.0144122	CFD, GRB7, SRC, ITPR1, PDGFB, AK3, CTSW, PRCP, A1BG, TUBA3A, PPP2CA, DOCK11, TUBB6, TMSB4X, A2M, JAM2, JAM3, PCDH7, ATP2B2, KIF6, RHOB, FGR, COL1A1, PROCR, P2RX5, DOK2, TUBB2A, SCCPDH, KIF26B, MAFF, CD9, LCP2, MAGED2, VPS45, CALM2
Reactome	R-RNO-9757110	Prednisone ADME	4	0.418848	6.47118	0.0205709	AKR1C1, AKR1C14, AKR1C3, RGD1559459
Reactome	R-RNO-8978868	Fatty acid metabolism	15	1.57068	1.93432	0.0220506	CBR1, PHYH, ELOVL5, AKR1C1, DBI, CROT, LTC4S, PTGS2, ACSF2, ACLY, SCD, FASN, CYP1A2, CYP1B1, HAO2
Reactome	R-RNO-71291	Metabolism of amino acids and derivatives	20	2.09424	1.70294	0.0247439	NQO1, AHCY, SDS, GOT1, GLS2, FMO1, MTR, MAT1A, PPM1K, OAZ1, DDO, PSMB9, SLC7A5, BHMT, ETHE1, KYNU, PHGDH, ASPA, HPD, PSPH
Reactome	R-RNO-112409	RAF-independent MAPK1/3 activation	5	0.52356	4.23708	0.0272072	DUSP2, DUSP10, DUSP1, DUSP8, DUSP6
Reactome	R-RNO-9018677	Biosynthesis of DHA-derived SPMs	4	0.418848	5.47562	0.0328135	CYP1A2, CYP2E1, LTC4S, PTGS2
Reactome	R-RNO-9018678	Biosynthesis of specialized proresolving mediators (SPMs)	4	0.418848	5.0845	0.0400712	CYP1A2, CYP2E1, LTC4S, PTGS2
Reactome	R-RNO-4085001	Sialic acid metabolism	5	0.52356	3.70745	0.0423647	ST6GALNAC2, ST8SIA1, ST3GAL4, ST6GALNAC4, GNE
Reactome	R-RNO-196854	Metabolism of vitamins and cofactors	14	1.46597	1.80537	0.0450024	NNMT, AKR1C1, MOCOS, AKR1C3, LPL, MTR, PTGS2, MTHFD1L, NMRK1, FASN, AKR1C14, NAMPT, AOX1, CALM2
Reactome	R-RNO-1474290	Collagen formation	7	0.732984	2.65043	0.0458273	COL1A1, COL3A1, BMP1, LOX, LOXL4, COL8A1, LOXL1
