# Supplementary material for: Co-regulation of Nr1d1 and Pparα in age-related changes of lipid metabolism and its modulation by calorie restriction
Source: Aging (Albany NY). 2025 Jul 28;17(7):1810–33. doi: 10.18632/aging.206289 (PMC12339034; doi:10.18632/aging.206289)
Supplement: Supplementary Table 3 [file aging-17-206289-s004.xlsx]

## Sheet: Up (O vs Y) & Up (OCR vs Old)
Gene	Description	FC (Old vs Young)	FC (Old-CR vs Old)
AABR07011057.2	\N	31.3414	2.56685
AABR07031491.2	\N	2.18859	1.77769
AABR07034750.1	\N	12.2101	2.2974
Adh6	alcohol dehydrogenase 6 (class V) [Source:RGD Symbol;Acc:1306313]	1.6358	1.75321
Akr1b7	aldo-keto reductase family 1, member B7 [Source:RGD Symbol;Acc:620257]	35.261	9.44794
Ccne1	cyclin E1 [Source:RGD Symbol;Acc:2294]	3.4822	2.08493
Ces2e	carboxylesterase 2E [Source:RGD Symbol;Acc:621563]	1.60214	2.08493
Ciart	circadian associated repressor of transcription [Source:RGD Symbol;Acc:1566380]	20.1122	2.8481
Cux2	cut-like homeobox 2 [Source:RGD Symbol;Acc:1305967]	3.91768	9.31787
Cxcl14	C-X-C motif chemokine ligand 14 [Source:RGD Symbol;Acc:1307406]	3.31728	1.65864
Cyp17a1	cytochrome P450, family 17, subfamily a, polypeptide 1 [Source:RGD Symbol;Acc:2456]	2.60268	1.87905
Dbp	D-box binding PAR bZIP transcription factor [Source:RGD Symbol;Acc:2491]	12.5533	1.94531
Entpd7	ectonucleoside triphosphate diphosphohydrolase 7 [Source:RGD Symbol;Acc:1310638]	8.75435	11.4716
Gcnt2	glucosaminyl (N-acetyl) transferase 2 (I blood group) [Source:RGD Symbol;Acc:1303198]	1.95884	4.14106
Hmg1l1	high-mobility group (nonhistone chromosomal) protein 1-like 1 [Source:RGD Symbol;Acc:1587112]	14.8254	2.26577
Hmgb3	high mobility group box 3 [Source:RGD Symbol;Acc:1564407]	60.1295	2.18859
Hspa8	heat shock protein family A (Hsp70) member 8 [Source:RGD Symbol;Acc:621725]	1.58008	1.61328
Hspb1	heat shock protein family B (small) member 1 [Source:RGD Symbol;Acc:61306]	1.65864	2.09943
Ifrd2	interferon-related developmental regulator 2 [Source:RGD Symbol;Acc:1310222]	1.84038	1.93187
Igfbp2	insulin-like growth factor binding protein 2 [Source:RGD Symbol;Acc:2873]	5.27803	5.42642
LOC100361492	cytochrome P450, family 2, subfamily c, polypeptide 55-like [Source:RGD Symbol;Acc:2320073]	8.33973	2.80889
LOC100912282	calcium-binding and coiled-coil domain-containing protein 1-like [Source:RGD Symbol;Acc:6488185]	13.0864	4.22807
LOC108348082	dual specificity mitogen-activated protein kinase kinase 3-like [Source:RGD Symbol;Acc:11389050]	31.3414	1.93187
Maff	MAF bZIP transcription factor F [Source:RGD Symbol;Acc:1309531]	4.11246	2.2974
MGC94199	similar to RIKEN cDNA 2610301B20; EST AI428449 [Source:RGD Symbol;Acc:1549749]	47.1766	2.28153
Nampt	nicotinamide phosphoribosyltransferase [Source:RGD Symbol;Acc:631365]	1.86607	2.88786
Nmrk1	nicotinamide riboside kinase 1 [Source:RGD Symbol;Acc:1564687]	2.82843	1.65864
Nol8	nucleolar protein 8 [Source:RGD Symbol;Acc:1309551]	3.91768	1.67018
Per2	period circadian regulator 2 [Source:RGD Symbol;Acc:61945]	1.75321	4.22807
Per3	period circadian regulator 3 [Source:RGD Symbol;Acc:621581]	6.19026	2.78949
Phgdh	phosphoglycerate dehydrogenase [Source:RGD Symbol;Acc:61987]	3.34035	1.68179
Pla1a	phospholipase A1 member A [Source:RGD Symbol;Acc:621261]	2.44528	2.09943
Por	cytochrome p450 oxidoreductase [Source:RGD Symbol;Acc:68335]	1.61328	3.03143
Prlr	prolactin receptor [Source:RGD Symbol;Acc:3407]	9.25351	7.1602
Rasl10b	RAS-like, family 10, member B [Source:RGD Symbol;Acc:1310873]	4.62675	4.65893
RGD1559459	similar to Expressed sequence AI788959 [Source:RGD Symbol;Acc:1559459]	2.60268	1.98618
RGD1565355	similar to fatty acid translocase/CD36 [Source:RGD Symbol;Acc:1565355]	3.43426	1.69349
Rgs16	regulator of G-protein signaling 16 [Source:RGD Symbol;Acc:1589741]	11.6318	2.2974
Rhobtb1	Rho-related BTB domain containing 1 [Source:RGD Symbol;Acc:1306871]	1.68179	1.91853
Sall1	spalt-like transcription factor 1 [Source:RGD Symbol;Acc:1309916]	2.26577	1.6245
Slc30a3	solute carrier family 30 member 3 [Source:RGD Symbol;Acc:1359689]	3.36359	3.13834
Spsb4	splA/ryanodine receptor domain and SOCS box containing 4 [Source:RGD Symbol;Acc:1562307]	6.32033	5.77572
Sstr3	somatostatin receptor 3 [Source:RGD Symbol;Acc:620308]	2.15846	1.69349
Svop	SV2 related protein [Source:RGD Symbol;Acc:620277]	5.24157	3.11666
Tef	TEF transcription factor, PAR bZIP family member [Source:RGD Symbol;Acc:3841]	2.05623	1.7411
Tifa	TRAF-interacting protein with forkhead-associated domain [Source:RGD Symbol;Acc:1359151]	1.76541	1.72907
Tmem30b	transmembrane protein 30B [Source:RGD Symbol;Acc:1308732]	4.08405	1.76541
Tmod1	tropomodulin 1 [Source:RGD Symbol;Acc:3874]	3.34035	4.46915
Tnfrsf21	TNF receptor superfamily member 21 [Source:RGD Symbol;Acc:1307308]	2.02792	2.62079
Trim24	tripartite motif-containing 24 [Source:RGD Symbol;Acc:1560596]	2.56685	3.91768
Upp2	uridine phosphorylase 2 [Source:RGD Symbol;Acc:1308188]	1.95884	1.61328
Usp2	ubiquitin specific peptidase 2 [Source:RGD Symbol;Acc:621073]	2.21914	2.92817
Wee1	WEE1 G2 checkpoint kinase [Source:RGD Symbol;Acc:1307895]	2.26577	4.75683

## Sheet: Up (O vs Y) & Down (OCR vs Old)
Gene	Description	FC (Old vs Young)	FC (Old-CR vs Old)
AABR07018078.1	PHD finger protein 11 [Source:NCBI gene;Acc:361051]	1.72907	-1.6245
AABR07021930.1	\N	1.82766	-4.75683
AABR07034739.1	Ig lambda-2 chain C region [Source:UniProtKB/Swiss-Prot;Acc:P20767]	2.56685	-2.25012
AABR07044820.1	\N	7.83536	-8.63383
AABR07058158.1	\N	35.0174	-2.39496
AABR07060610.1	\N	13.9288	-15.3482
Aacs	acetoacetyl-CoA synthetase [Source:RGD Symbol;Acc:708522]	3.97237	-2.02792
AC114233.1	\N	6.9644	-7.67411
Acacb	acetyl-CoA carboxylase beta [Source:RGD Symbol;Acc:620500]	1.55833	-1.90528
Acly	ATP citrate lyase [Source:RGD Symbol;Acc:2018]	1.77769	-1.72907
Adam8	ADAM metallopeptidase domain 8 [Source:RGD Symbol;Acc:1566394]	14.2215	-5.31474
Adamdec1	ADAM-like, decysin 1 [Source:RGD Symbol;Acc:1309861]	3.41054	-1.97247
Adgrg2	adhesion G protein-coupled receptor G2 [Source:RGD Symbol;Acc:628618]	6.54322	-5.77572
Adora1	adenosine A1 receptor [Source:RGD Symbol;Acc:2048]	3.31728	-2.34567
Aldh1a1	aldehyde dehydrogenase 1 family, member A1 [Source:RGD Symbol;Acc:2087]	5.31474	-1.79005
Aldh1a7	aldehyde dehydrogenase family 1, subfamily A7 [Source:RGD Symbol;Acc:620252]	2.53151	-2.86791
Ankef1	ankyrin repeat and EF-hand domain containing 1 [Source:RGD Symbol;Acc:1304809]	15.6707	-2.46229
Ankrd6	ankyrin repeat domain 6 [Source:RGD Symbol;Acc:1583731]	14.8254	-3.27161
Anxa8	annexin A8 [Source:RGD Symbol;Acc:1307719]	5.42642	-4.14106
Arhgap30	Rho GTPase activating protein 30 [Source:RGD Symbol;Acc:1561419]	2.18859	-2.39496
Arhgef16	Rho guanine nucleotide exchange factor 16 [Source:RGD Symbol;Acc:1588981]	4.59479	-5.02805
Atg16l2	autophagy related 16-like 2 [Source:RGD Symbol;Acc:1311400]	2.32947	-1.64718
B9d1	B9 domain containing 1 [Source:RGD Symbol;Acc:1305522]	2.54912	-2.02792
C5ar2	complement component 5a receptor 2 [Source:RGD Symbol;Acc:1303027]	2.11404	-1.98618
Ca6	carbonic anhydrase 6 [Source:RGD Symbol;Acc:70516]	2.08493	-2.92817
Casp12	caspase 12 [Source:RGD Symbol;Acc:621758]	2.32947	-1.61328
Ccdc113	coiled-coil domain containing 113 [Source:RGD Symbol;Acc:1565763]	5.24157	-11.5514
Ccdc141	coiled-coil domain containing 141 [Source:RGD Symbol;Acc:1593250]	2.07053	-3.22657
Ccl21	C-C motif chemokine ligand 21 [Source:RGD Symbol;Acc:1311996]	3.4822	-2.17347
Ccng1	cyclin G1 [Source:RGD Symbol;Acc:2295]	1.65864	-1.70527
Cd9	CD9 molecule [Source:RGD Symbol;Acc:2318]	2.77022	-2.15846
Cdh13	cadherin 13 [Source:RGD Symbol;Acc:619745]	194.012	-5.54044
Cdkl2	cyclin dependent kinase like 2 [Source:RGD Symbol;Acc:1309625]	3.75809	-6.86852
Cdkn1c	cyclin-dependent kinase inhibitor 1C [Source:RGD Symbol;Acc:727892]	9.57983	-2.8481
Chrdl1	chordin-like 1 [Source:RGD Symbol;Acc:735215]	1.72907	-2.02792
Cish	cytokine inducible SH2-containing protein [Source:RGD Symbol;Acc:69261]	1.6245	-2.42839
Clic2	chloride intracellular channel 2 [Source:RGD Symbol;Acc:1306580]	2.44528	-2.14355
Cnp	2',3'-cyclic nucleotide 3' phosphodiesterase [Source:RGD Symbol;Acc:2368]	2.28153	-1.93187
Cryl1	crystallin, lambda 1 [Source:RGD Symbol;Acc:631427]	1.97247	-2.14355
Csmd1	CUB and Sushi multiple domains 1 [Source:RGD Symbol;Acc:1305103]	3.5801	-2.75108
Ctsw	cathepsin W [Source:RGD Symbol;Acc:1309354]	4.37717	-3.605
Cxcl1	C-X-C motif chemokine ligand 1 [Source:RGD Symbol;Acc:619869]	15.2422	-3.18215
Cxcl9	C-X-C motif chemokine ligand 9 [Source:RGD Symbol;Acc:628798]	1.6358	-1.84038
Cyp1b1	cytochrome P450, family 1, subfamily b, polypeptide 1 [Source:RGD Symbol;Acc:2460]	6.9644	-7.67411
Cyp4a2	cytochrome P450, family 4, subfamily a, polypeptide 2 [Source:RGD Symbol;Acc:2479]	5.24157	-1.61328
Dcn	decorin [Source:RGD Symbol;Acc:61895]	4	-1.82766
Dcun1d2	defective in cullin neddylation 1 domain containing 2 [Source:RGD Symbol;Acc:1582994]	132.514	-146.018
Dusp13	dual specificity phosphatase 13 [Source:RGD Symbol;Acc:1359712]	5.81589	-3.20428
Dusp26	dual specificity phosphatase 26 [Source:RGD Symbol;Acc:1310090]	2.73208	-2.65737
Efemp1	EGF containing fibulin extracellular matrix protein 1 [Source:RGD Symbol;Acc:1308528]	3.4822	-4.46915
Elf3	E74 like ETS transcription factor 3 [Source:RGD Symbol;Acc:1310687]	3.5801	-2.53151
Entpd7	ectonucleoside triphosphate diphosphohydrolase 7 [Source:RGD Symbol;Acc:1310638]	8.75435	-9.57983
Epha3	Eph receptor A3 [Source:RGD Symbol;Acc:68389]	3.43426	-2.39496
Evc	EvC ciliary complex subunit 1 [Source:RGD Symbol;Acc:735186]	1.75321	-1.76541
Fam49a	family with sequence similarity 49, member A [Source:RGD Symbol;Acc:1305961]	2.21914	-2.67586
Fasn	fatty acid synthase [Source:RGD Symbol;Acc:620665]	2.20381	-2.05623
Fgf21	fibroblast growth factor 21 [Source:RGD Symbol;Acc:620175]	4.31691	-2.12874
G6pd	glucose-6-phosphate dehydrogenase [Source:RGD Symbol;Acc:2645]	1.75321	-2.25012
Gas6	growth arrest specific 6 [Source:RGD Symbol;Acc:61913]	2.25012	-1.86607
Gdf15	growth differentiation factor 15 [Source:RGD Symbol;Acc:2674]	1.84038	-2.80889
Gem	GTP binding protein overexpressed in skeletal muscle [Source:RGD Symbol;Acc:1307386]	3.91768	-3.45815
Gria3	glutamate ionotropic receptor AMPA type subunit 3 [Source:RGD Symbol;Acc:70958]	2.23457	-3.4822
Gsn	gelsolin [Source:RGD Symbol;Acc:1303089]	4.72397	-3.16017
Gstm3l	glutathione S-transferase mu 3-like [Source:RGD Symbol;Acc:620381]	4.02782	-4.43828
Hmox1	heme oxygenase 1 [Source:RGD Symbol;Acc:2806]	1.69349	-1.79005
Htatip2	HIV-1 Tat interactive protein 2 [Source:RGD Symbol;Acc:1309941]	2.15846	-1.75321
Igfn1	immunoglobulin-like and fibronectin type III domain containing 1 [Source:RGD Symbol;Acc:1565384]	48.8403	-11.1579
Ighm	immunoglobulin heavy constant mu [Source:MGI Symbol;Acc:MGI:96448]	3.24901	-1.64718
Il17rb	interleukin 17 receptor B [Source:RGD Symbol;Acc:1311392]	2.8481	-2.46229
Irf7	interferon regulatory factor 7 [Source:RGD Symbol;Acc:1307828]	3.65533	-1.75321
Kctd15	potassium channel tetramerization domain containing 15 [Source:RGD Symbol;Acc:1583737]	1.93187	-3.22657
Ky	kyphoscoliosis peptidase [Source:RGD Symbol;Acc:1305407]	14.2215	-2.39496
Lgals3	galectin 3 [Source:RGD Symbol;Acc:69356]	2.32947	-1.81504
LOC100909548	cation-dependent mannose-6-phosphate receptor-like [Source:RGD Symbol;Acc:6502964]	13.9288	-15.3482
LOC100910130	protein FAM50A-like [Source:RGD Symbol;Acc:6500228]	1.8025	-2.21914
LOC100911104	lymphocyte antigen 6B-like [Source:RGD Symbol;Acc:6495044]	9.57983	-10.5561
LOC100912538	centrin-3-like [Source:RGD Symbol;Acc:6486167]	2.71321	-8.51496
LOC102549408	uncharacterized LOC102549408 [Source:RGD Symbol;Acc:7563702]	36.7583	-2.69447
LOC103689977	caspase-6 [Source:RGD Symbol;Acc:9205219]	4.37717	-12.042
LOC103689983	hypoxanthine-guanine phosphoribosyltransferase [Source:RGD Symbol;Acc:9163824]	6.9644	-7.67411
LOC103689999	saccharopine dehydrogenase-like oxidoreductase [Source:RGD Symbol;Acc:9250610]	8.9383	-1.97247
LOC108348072	class II histocompatibility antigen, M alpha chain [Source:RGD Symbol;Acc:11505944]	89.8845	-2.05623
LOC108348083	delta-1-pyrroline-5-carboxylate synthase [Source:RGD Symbol;Acc:11512751]	17.5087	-19.1597
LOC108348098	breast cancer metastasis-suppressor 1 homolog [Source:RGD Symbol;Acc:11501278]	15.6707	-17.2677
LOC691695	similar to granzyme C [Source:RGD Symbol;Acc:1597199]	7.83536	-8.63383
Lss	lanosterol synthase [Source:RGD Symbol;Acc:620955]	2.75108	-1.64718
Lum	lumican [Source:RGD Symbol;Acc:620984]	6.9644	-3.41054
Me1	malic enzyme 1 [Source:RGD Symbol;Acc:3074]	1.58008	-2.12874
MGC105649	hypothetical LOC302884 [Source:RGD Symbol;Acc:1359583]	4.37717	-7.21
MGC94199	similar to RIKEN cDNA 2610301B20; EST AI428449 [Source:RGD Symbol;Acc:1549749]	47.1766	-2.07053
Moap1	modulator of apoptosis 1 [Source:RGD Symbol;Acc:1307230]	209.383	-229.126
Mok	MOK protein kinase [Source:RGD Symbol;Acc:1309274]	2.54912	-2.92817
Mpdz	multiple PDZ domain crumbs cell polarity complex component [Source:RGD Symbol;Acc:3105]	1.58008	-1.86607
Mt-nd6	mitochondrially encoded NADH dehydrogenase 6 [Source:RGD Symbol;Acc:620561]	2.05623	-1.95884
Mup4	major urinary protein 4 [Source:RGD Symbol;Acc:735211]	11.3137	-12.4666
Mvd	mevalonate diphosphate decarboxylase [Source:RGD Symbol;Acc:621292]	2.08493	-1.79005
Mybl1	MYB proto-oncogene like 1 [Source:RGD Symbol;Acc:1306940]	2.92817	-4.02782
Myo7b	myosin VIIb [Source:RGD Symbol;Acc:1561153]	3.13834	-2.25012
Nek8	NIMA-related kinase 8 [Source:RGD Symbol;Acc:1306897]	2.28153	-1.91853
NEWGENE_1559832	ring finger protein, LIM domain interacting [Source:RGD Symbol;Acc:11393862]	49.8665	-54.9482
NEWGENE_1562258	INO80 complex subunit B [Source:RGD Symbol;Acc:9421107]	2.17347	-83.8652
Nkg7	natural killer cell granule protein 7 [Source:RGD Symbol;Acc:621523]	3.91768	-3.70635
Nupr1l1	nuclear protein, transcriptional regulator, 1-like 1 [Source:RGD Symbol;Acc:9125019]	55.7152	-3.22657
Optc	opticin [Source:RGD Symbol;Acc:1304916]	5.42642	-4.25748
P2rx5	purinergic receptor P2X 5 [Source:RGD Symbol;Acc:620256]	12.2101	-13.4543
Pdcd5	programmed cell death 5 [Source:RGD Symbol;Acc:1310561]	4.46915	-1.67018
Pdgfb	platelet derived growth factor subunit B [Source:RGD Symbol;Acc:3283]	3.78423	-2.49666
Pdlim4	PDZ and LIM domain 4 [Source:RGD Symbol;Acc:3575]	4.82323	-7.1602
Pla2g7	phospholipase A2 group VII [Source:RGD Symbol;Acc:1310734]	13.9288	-3.83706
Plp2	proteolipid protein 2 [Source:RGD Symbol;Acc:1587363]	1.91853	-1.68179
Pnpla3	patatin-like phospholipase domain containing 3 [Source:RGD Symbol;Acc:1595843]	6.10504	-2.88786
Pnpla5	patatin-like phospholipase domain containing 5 [Source:RGD Symbol;Acc:1307495]	8.9383	-4.92458
Podnl1	podocan-like 1 [Source:RGD Symbol;Acc:1307753]	6.10504	-6.72717
Popdc2	popeye domain containing 2 [Source:RGD Symbol;Acc:735226]	3.50642	-2.36199
Ppm1j	protein phosphatase, Mg2+/Mn2+ dependent, 1J [Source:RGD Symbol;Acc:1359104]	8.45614	-2.32947
Ppp2ca	protein phosphatase 2 catalytic subunit alpha [Source:RGD Symbol;Acc:3380]	2.02792	-2.65737
Procr	protein C receptor [Source:RGD Symbol;Acc:1305991]	1.95884	-2.75108
Prss36	serine protease 36 [Source:RGD Symbol;Acc:1593186]	1.94531	-1.71713
Ptgs2	prostaglandin-endoperoxide synthase 2 [Source:RGD Symbol;Acc:620349]	7.83536	-8.63383
Rab7b	Rab7b, member RAS oncogene family [Source:RGD Symbol;Acc:1562617]	3.34035	-2.77022
Rassf10	Ras association domain family member 10 [Source:RGD Symbol;Acc:1309847]	5.24157	-5.77572
Rbbp8nl	RBBP8 N-terminal like [Source:RGD Symbol;Acc:1596090]	7.4127	-5.02805
Resp18	regulated endocrine-specific protein 18 [Source:RGD Symbol;Acc:3555]	3.11666	-2.39496
RGD1563354	RIKEN cDNA D630003M21 gene [Source:MGI Symbol;Acc:MGI:3606579]	13.9288	-3.07375
Rhoc	ras homolog family member C [Source:RGD Symbol;Acc:1304965]	2.90795	-2.02792
Rhpn1	rhophilin, Rho GTPase binding protein 1 [Source:RGD Symbol;Acc:1305688]	3.4822	-3.24901
Sbk1	SH3 domain binding kinase 1 [Source:RGD Symbol;Acc:628713]	48.1679	-52.7098
Scd	stearoyl-CoA desaturase [Source:RGD Symbol;Acc:621176]	1.77769	-4.46915
Scd2	stearoyl-Coenzyme A desaturase 2 [Source:RGD Symbol;Acc:621177]	3.05252	-2.09943
Slc2a5	solute carrier family 2 member 5 [Source:RGD Symbol;Acc:68328]	3.07375	-1.7411
Slit3	slit guidance ligand 3 [Source:RGD Symbol;Acc:69311]	3.4822	-5.1337
Spink1	serine peptidase inhibitor, Kazal type 1 [Source:RGD Symbol;Acc:3749]	2.96905	-2.75108
Src	SRC proto-oncogene, non-receptor tyrosine kinase [Source:RGD Symbol;Acc:620795]	2.67586	-2.07053
Sult4a1	sulfotransferase family 4A, member 1 [Source:RGD Symbol;Acc:69292]	11.4716	-7.56846
Syne4	spectrin repeat containing nuclear envelope family member 4 [Source:RGD Symbol;Acc:1304580]	16.5642	-18.2522
Syt15	synaptotagmin 15 [Source:RGD Symbol;Acc:727964]	6.32033	-3.11666
Tas1r1	taste 1 receptor member 1 [Source:RGD Symbol;Acc:61891]	1.65864	-1.97247
Tcp11x2	t-complex 11 family, X-linked 2 [Source:RGD Symbol;Acc:1598081]	4.37717	-2.75108
Thbs4	thrombospondin 4 [Source:RGD Symbol;Acc:62046]	9.51366	-1.98618
Tle6	TLE family member 6, subcortical maternal complex member [Source:RGD Symbol;Acc:1561530]	4.08405	-13.4543
Tmem106a	transmembrane protein 106A [Source:RGD Symbol;Acc:1309043]	2.2974	-1.6358
Tnfrsf12a	TNF receptor superfamily member 12A [Source:RGD Symbol;Acc:631329]	2	-1.64718
Tpd52l1	TPD52 like 1 [Source:RGD Symbol;Acc:1594796]	3.5801	-1.91853
Trim80	tripartite motif protein 80 [Source:RGD Symbol;Acc:1311352]	2.08493	-2.20381
Trpv4	transient receptor potential cation channel, subfamily V, member 4 [Source:RGD Symbol;Acc:69337]	3.5801	-2.15846
Tspo	translocator protein [Source:RGD Symbol;Acc:2228]	1.91853	-2.58471
Ttc25	tetratricopeptide repeat domain 25 [Source:RGD Symbol;Acc:1311859]	2.62079	-1.90528
Ubd	ubiquitin D [Source:RGD Symbol;Acc:69418]	3.94493	-4.25748
Unc5b	unc-5 netrin receptor B [Source:RGD Symbol;Acc:621756]	2.8481	-1.82766
Vxn	vexin [Source:RGD Symbol;Acc:1561849]	2.62079	-3.50642
Wfdc21	WAP four-disulfide core domain 21 [Source:RGD Symbol;Acc:1303147]	2.26577	-2.28153
Zbtb16	zinc finger and BTB domain containing 16 [Source:RGD Symbol;Acc:727921]	3.55537	-1.77769
Zdhhc2	zinc finger DHHC-type palmitoyltransferase 2 [Source:RGD Symbol;Acc:628681]	1.95884	-3.27161
Zfp260	zinc finger protein 260 [Source:RGD Symbol;Acc:621205]	12.2101	-13.4543
Zfp7	zinc finger protein 7 [Source:RGD Symbol;Acc:1310636]	20.1122	-22.1618
Zfp90	zinc finger protein 90 [Source:RGD Symbol;Acc:1563077]	2.46229	-2.18859
Zp2	zona pellucida glycoprotein 2 [Source:RGD Symbol;Acc:620605]	10.4831	-11.5514

## Sheet: Down (O vs Y) & Up (OCR vs Old)
Gene	Description	FC (Old vs Young)	FC (Old-CR vs Old)
AABR07004549.1	\N	-1.59107	1.54756
AABR07006310.1	macrophage expressed 1 [Source:NCBI gene;Acc:64552]	-2.77022	1.8025
AABR07028009.1	proteasome (prosome, macropain) activator subunit 1 (PA28 alpha), pseudo 1 [Source:NCBI gene;Acc:685197]	-10.5561	4.59479
AABR07044049.1	\N	-6.86852	10.4107
AABR07054400.1	cyclic nucleotide binding domain containing 2 [Source:NCBI gene;Acc:296311]	-3.43426	3.94493
Abcg5	ATP binding cassette subfamily G member 5 [Source:RGD Symbol;Acc:620298]	-2.58471	4.43828
Abcg8	ATP binding cassette subfamily G member 8 [Source:RGD Symbol;Acc:620300]	-6.9163	6.58873
Adamts1	ADAM metallopeptidase with thrombospondin type 1 motif, 1 [Source:RGD Symbol;Acc:621241]	-2	2.53151
Adcy10	adenylate cyclase 10 [Source:RGD Symbol;Acc:708450]	-6.10504	8.69388
Aldh18a1	aldehyde dehydrogenase 18 family, member A1 [Source:RGD Symbol;Acc:1311431]	-12.6407	10.4107
Aox3	aldehyde oxidase 3 [Source:RGD Symbol;Acc:1359328]	-3.38698	1.81504
Apon	apolipoprotein N [Source:RGD Symbol;Acc:1311384]	-1.76541	1.67018
Arnt	aryl hydrocarbon receptor nuclear translocator [Source:RGD Symbol;Acc:2153]	-2.04202	2.15846
Atg13	autophagy related 13 [Source:RGD Symbol;Acc:1310685]	-1.81504	1.75321
Atp11c	ATPase phospholipid transporting 11C [Source:RGD Symbol;Acc:1564481]	-3.05252	2.44528
Bach1	BTB domain and CNC homolog 1 [Source:RGD Symbol;Acc:1306693]	-2.51403	1.82766
Bcl6	BCL6, transcription repressor [Source:RGD Symbol;Acc:1309345]	-2.15846	2.21914
C1qa	complement C1q A chain [Source:RGD Symbol;Acc:1306716]	-1.61328	1.61328
Ccdc127	coiled-coil domain containing 127 [Source:RGD Symbol;Acc:735106]	-2.46229	2.37841
Ceacam4	CEA cell adhesion molecule 4 [Source:RGD Symbol;Acc:708435]	-3.11666	3.11666
Cetn3	centrin 3 [Source:RGD Symbol;Acc:620249]	-2.77022	3.55537
Cfd	complement factor D [Source:RGD Symbol;Acc:2498]	-2	2.15846
Chtopl1	chromatin target of PRMT1-like 1 [Source:RGD Symbol;Acc:1584868]	-2.36199	2.28153
Cry1	cryptochrome circadian regulator 1 [Source:RGD Symbol;Acc:735083]	-1.77769	4.75683
Ctdsp2	CTD small phosphatase 2 [Source:RGD Symbol;Acc:2319209]	-2.2974	1.97247
Cyb5d1	cytochrome b5 domain containing 1 [Source:RGD Symbol;Acc:1559567]	-13.737	10.4107
Cyp1a2	cytochrome P450, family 1, subfamily a, polypeptide 2 [Source:RGD Symbol;Acc:2459]	-2.23457	2.37841
Cyp2c12	cytochrome P450, family 2, subfamily c, polypeptide 12 [Source:RGD Symbol;Acc:2470]	-1.69349	19.0273
Cyp3a9	cytochrome P450, family 3, subfamily a, polypeptide 9 [Source:RGD Symbol;Acc:708392]	-19.6983	2.67586
Cyp7b1	cytochrome P450 family 7 subfamily B member 1 [Source:RGD Symbol;Acc:2483]	-4.53154	1.69349
Cytip	cytohesin 1 interacting protein [Source:RGD Symbol;Acc:1307990]	-5.57897	3.07375
Esr1	estrogen receptor 1 [Source:RGD Symbol;Acc:2581]	-1.89212	2.26577
Exph5	exophilin 5 [Source:RGD Symbol;Acc:1560308]	-2.54912	2.47942
Faahl	fatty-acid amide hydrolase-like [Source:RGD Symbol;Acc:6491947]	-2.23457	1.59107
Fam50a	family with sequence similarity 50, member A [Source:RGD Symbol;Acc:1560964]	-1.79005	2.56685
Fmo1	flavin containing dimethylaniline monoxygenase 1 [Source:RGD Symbol;Acc:2622]	-3.41054	2.09943
Gls2	glutaminase 2 [Source:RGD Symbol;Acc:620359]	-1.86607	1.61328
Gon7	GON7 subunit of KEOPS complex [Source:RGD Symbol;Acc:2302582]	-2.05623	2.34567
Got1	glutamic-oxaloacetic transaminase 1 [Source:RGD Symbol;Acc:2721]	-2.26577	1.72907
Gzmc	granzyme C [Source:RGD Symbol;Acc:620019]	-9.18959	6.23332
Hamp	hepcidin antimicrobial peptide [Source:RGD Symbol;Acc:70971]	-1.64718	1.64718
Hpd	4-hydroxyphenylpyruvate dioxygenase [Source:RGD Symbol;Acc:61974]	-1.68179	1.76541
Igf2bp3	insulin-like growth factor 2 mRNA binding protein 3 [Source:RGD Symbol;Acc:1306512]	-3.97237	2.32947
Inmt	indolethylamine N-methyltransferase [Source:RGD Symbol;Acc:1597087]	-7.31065	2.34567
Irx1	iroquois homeobox 1 [Source:RGD Symbol;Acc:1309060]	-2.02792	5.89708
Klrg1	killer cell lectin like receptor G1 [Source:RGD Symbol;Acc:61978]	-2.62079	2.67586
Krt10	keratin 10 [Source:RGD Symbol;Acc:1359092]	-1.98618	2.34567
LOC100910057	sulfotransferase 1C2-like [Source:RGD Symbol;Acc:6500449]	-2.26577	3.11666
LOC100910526	sulfotransferase 1C2-like [Source:RGD Symbol;Acc:6497849]	-3.01049	2.69447
LOC100911356	peroxisomal biogenesis factor 19-like [Source:RGD Symbol;Acc:6493558]	-2.51403	2.21914
LOC100911994	coiled-coil domain-containing protein 132-like [Source:RGD Symbol;Acc:6489220]	-32	10.4107
LOC100912427	nuclease-sensitive element-binding protein 1-like [Source:RGD Symbol;Acc:6486912]	-6.49802	6.9163
LOC103689961	selenoprotein W-like [Source:RGD Symbol;Acc:9418506]	-1.75321	2.42839
LOC103694381	lymphotoxin-beta [Source:RGD Symbol;Acc:9083628]	-11.4716	9.38268
LOC108348055	B9 domain-containing protein 1 [Source:RGD Symbol;Acc:11475921]	-5.16941	4.22807
LOC108348145	zinc finger protein 7-like [Source:RGD Symbol;Acc:11394947]	-2.09943	2.73208
LOC108349189	high mobility group protein B1 pseudogene [Source:RGD Symbol;Acc:11468204]	-3.16017	3.29436
LOC501233	LRRGT00080 [Source:RGD Symbol;Acc:1564453]	-3.03143	1.64718
MGC94199	similar to RIKEN cDNA 2610301B20; EST AI428449 [Source:RGD Symbol;Acc:1549749]	-3.34035	2.28153
Mmd2	monocyte to macrophage differentiation-associated 2 [Source:RGD Symbol;Acc:1306506]	-32	10.4107
Mt1	metallothionein 1 [Source:RGD Symbol;Acc:3117]	-2.86791	3.50642
NEWGENE_1582994	DCN1, defective in cullin neddylation 1, domain containing 2 [Source:RGD Symbol;Acc:9432541]	-4.53154	5.57897
NEWGENE_621351	collagen, type I, alpha 2 [Source:RGD Symbol;Acc:9452897]	-27.4741	17.1484
Nfil3	nuclear factor, interleukin 3 regulated [Source:RGD Symbol;Acc:620972]	-1.64718	1.56917
Nnmt	nicotinamide N-methyltransferase [Source:RGD Symbol;Acc:1309606]	-1.8025	1.56917
Noct	nocturnin [Source:RGD Symbol;Acc:1587344]	-3.43426	3.97237
Nxpe5	neurexophilin and PC-esterase domain family, member 5 [Source:RGD Symbol;Acc:1588255]	-3.05252	2.65737
Phyh	phytanoyl-CoA 2-hydroxylase [Source:RGD Symbol;Acc:620317]	-1.60214	1.70527
Pisd	phosphatidylserine decarboxylase [Source:RGD Symbol;Acc:1596729]	-2.2974	1.85318
Ppm1k	protein phosphatase, Mg2+/Mn2+ dependent, 1K [Source:RGD Symbol;Acc:1308501]	-2.9897	1.85318
Ppp4r4	protein phosphatase 4, regulatory subunit 4 [Source:RGD Symbol;Acc:1560932]	-6.10504	4.85678
Prodh1	proline dehydrogenase 1 [Source:RGD Symbol;Acc:1590932]	-1.65864	2.42839
Ptpdc1	protein tyrosine phosphatase domain containing 1 [Source:RGD Symbol;Acc:1307698]	-1.93187	1.91853
Rasgef1b	RasGEF domain family, member 1B [Source:RGD Symbol;Acc:1562220]	-1.85318	1.6245
Retsat	retinol saturase [Source:RGD Symbol;Acc:628802]	-1.65864	1.53688
RGD1564053	RIKEN cDNA A830018L16 gene [Source:MGI Symbol;Acc:MGI:2444149]	-3.43426	3.75809
Rlim	ring finger protein, LIM domain interacting [Source:RGD Symbol;Acc:1559832]	-6.10504	6.1475
RT1-DMa	RT1 class II, locus DMa [Source:RGD Symbol;Acc:735053]	-35.5062	32.2226
Sccpdh	saccharopine dehydrogenase (putative) [Source:RGD Symbol;Acc:1311440]	-1360.57	786.88
Sds	serine dehydratase [Source:RGD Symbol;Acc:67376]	-15.8895	5.35171
Sik1	salt-inducible kinase 1 [Source:RGD Symbol;Acc:69407]	-1.95884	3.31728
Slc1a2	solute carrier family 1 member 2 [Source:RGD Symbol;Acc:3697]	-4.19887	5.46416
Sult1c2	sulfotransferase family 1C member 2 [Source:RGD Symbol;Acc:621064]	-6.86852	7.01285
Tcp11l2	t-complex 11 like 2 [Source:RGD Symbol;Acc:1307494]	-1.65864	1.76541
Tspan12	tetraspanin 12 [Source:RGD Symbol;Acc:1311102]	-2.28153	1.61328
Vmac	vimentin-type intermediate filament associated coiled-coil protein [Source:RGD Symbol;Acc:1303340]	-2.49666	2.54912
Zbtb38	zinc finger and BTB domain containing 38 [Source:RGD Symbol;Acc:1310136]	-2.20381	2.34567
Znf48	zinc finger protein 48 [Source:RGD Symbol;Acc:9115869]	-2.09943	1.94531

## Sheet: Down (O vs Y) & Do (OCR vs Old)
Supplementary Table 3. Genes with significant expression changes in the Old vs. Young and Old-CR vs. Old datasets.
Gene	Description	FC (Old vs Young)	FC (Old-CR vs Old)
5330417C22Rik	RIKEN cDNA 5330417C22 gene [Source:MGI Symbol;Acc:MGI:1923930]	-1.85318	-1.6358
AABR07019392.1	\N	-2.46229	-6.23332
AABR07030091.1	\N	-2.94854	-2.51403
AABR07044404.1	\N	-1.69349	-5.24157
AABR07048473.1	\N	-1.77769	-1.90528
Acpp	acid phosphatase, prostate [Source:RGD Symbol;Acc:2023]	-4.40762	-4.50023
Akr1c1	aldo-keto reductase family 1, member C1 [Source:RGD Symbol;Acc:1306847]	-2.60268	-1.76541
Akr1c2	aldo-keto reductase family 1, member C2 [Source:RGD Symbol;Acc:1311841]	-3.16017	-4.08405
Akr1c3	aldo-keto reductase family 1, member C3 [Source:RGD Symbol;Acc:708428]	-1.94531	-2.44528
Arntl	aryl hydrocarbon receptor nuclear translocator-like [Source:RGD Symbol;Acc:62003]	-3.11666	-9.51366
Arntl2	aryl hydrocarbon receptor nuclear translocator-like 2 [Source:RGD Symbol;Acc:620230]	-5.35171	-5.77572
Asap2	ArfGAP with SH3 domain, ankyrin repeat and PH domain 2 [Source:RGD Symbol;Acc:1305263]	-2.53151	-2.56685
Atp2b2	ATPase plasma membrane Ca2+ transporting 2 [Source:RGD Symbol;Acc:2176]	-2.82843	-4.92458
Bhmt	betaine-homocysteine S-methyltransferase [Source:RGD Symbol;Acc:621496]	-1.75321	-3.65533
Brms1l	BRMS1 like transcriptional repressor [Source:RGD Symbol;Acc:1306006]	-2.82843	-2.9897
Ccnj	cyclin J [Source:RGD Symbol;Acc:1306399]	-2.2974	-22.1618
Cela1	chymotrypsin like elastase 1 [Source:RGD Symbol;Acc:2547]	-2.51403	-1.95884
Chka	choline kinase alpha [Source:RGD Symbol;Acc:61944]	-2.08493	-3.4822
Cldn1	claudin 1 [Source:RGD Symbol;Acc:68422]	-1.77769	-5.89708
Clpx	caseinolytic mitochondrial matrix peptidase chaperone subunit [Source:RGD Symbol;Acc:1304883]	-1.58008	-1.86607
Cmtm6	CKLF-like MARVEL transmembrane domain containing 6 [Source:RGD Symbol;Acc:1307765]	-1.71713	-2.47942
Col3a1	collagen type III alpha 1 chain [Source:RGD Symbol;Acc:71029]	-1.58008	-1.60214
Cyp2c11	cytochrome P450, subfamily 2, polypeptide 11 [Source:RGD Symbol;Acc:2469]	-1.69349	-2.05623
Cyp4f39	cytochrome P450, family 4, subfamily f, polypeptide 39 [Source:RGD Symbol;Acc:1308796]	-3.34035	-2.69447
Dhrs7l1	dehydrogenase/reductase (SDR family) member 7-like 1 [Source:RGD Symbol;Acc:1308036]	-3.41054	-2.78949
Dipk2a	divergent protein kinase domain 2A [Source:RGD Symbol;Acc:1309079]	-2.09943	-1.77769
Elovl5	ELOVL fatty acid elongase 5 [Source:RGD Symbol;Acc:620583]	-2.2974	-1.7411
Fam169b	family with sequence similarity 169, member B [Source:RGD Symbol;Acc:1585883]	-3.34035	-3.53081
Galt	galactose-1-phosphate uridylyltransferase [Source:RGD Symbol;Acc:1306483]	-1.61328	-2.36199
Gimd1	GIMAP family P-loop NTPase domain containing 1 [Source:RGD Symbol;Acc:1563706]	-2.63902	-2.63902
Hao2	hydroxyacid oxidase 2 [Source:RGD Symbol;Acc:70972]	-4.08405	-2.2974
Hgd	homogentisate 1, 2-dioxygenase [Source:RGD Symbol;Acc:1308757]	-1.55833	-1.95884
Insig2	insulin induced gene 2 [Source:RGD Symbol;Acc:631417]	-2.53151	-2.42839
Jcad	junctional cadherin 5 associated [Source:RGD Symbol;Acc:1562037]	-2.46229	-2.11404
Kynu	kynureninase [Source:RGD Symbol;Acc:71061]	-2.60268	-2.42839
LOC100910790	spondin-2-like [Source:RGD Symbol;Acc:6496621]	-2.36199	-2.12874
LOC100911854	mannose-binding protein C-like [Source:RGD Symbol;Acc:6490749]	-1.60214	-1.65864
LOC100912405	urinary protein 3-like [Source:RGD Symbol;Acc:6487535]	-1.67018	-1.77769
LOC298111	alpha2u globulin [Source:RGD Symbol;Acc:1593272]	-3.68075	-1.56917
LOC680406	similar to Urinary protein 2 precursor (RUP-2) [Source:RGD Symbol;Acc:1591793]	-1.86607	-2.39496
LOC685067	similar to guanylate binding protein family, member 6 [Source:RGD Symbol;Acc:1583235]	-3.09513	-2.94854
LOC688583	similar to High mobility group protein 4 (HMG-4) (High mobility group protein 2a) (HMG-2a) [Source:RGD Symbol;Acc:1587596]	-1.70527	-97.6806
Lox	lysyl oxidase [Source:RGD Symbol;Acc:3015]	-35.0174	-4.25748
Loxl4	lysyl oxidase-like 4 [Source:RGD Symbol;Acc:1308588]	-1.98618	-2.26577
Ltc4s	leukotriene C4 synthase [Source:RGD Symbol;Acc:620677]	-2.53151	-6.54322
Map2k3	mitogen activated protein kinase kinase 3 [Source:RGD Symbol;Acc:1306620]	-15.1369	-25.9921
MGC108823	similar to interferon-inducible GTPase [Source:RGD Symbol;Acc:1359421]	-2.21914	-2.58471
MGC94199	similar to RIKEN cDNA 2610301B20; EST AI428449 [Source:RGD Symbol;Acc:1549749]	-3.34035	-2.07053
Mreg	melanoregulin [Source:RGD Symbol;Acc:1562333]	-1.91853	-1.98618
Mup4	major urinary protein 4 [Source:RGD Symbol;Acc:735211]	-4.19887	-12.4666
Mup5	major urinary protein 5 [Source:RGD Symbol;Acc:735107]	-3.605	-1.6245
NEWGENE_621351	collagen, type I, alpha 2 [Source:RGD Symbol;Acc:9452897]	-27.4741	-1.87905
Nim1k	NIM1 serine/threonine protein kinase [Source:RGD Symbol;Acc:1308116]	-6.9644	-3.01049
Npas2	neuronal PAS domain protein 2 [Source:RGD Symbol;Acc:1309681]	-2.8481	-23.5883
Odf3b	outer dense fiber of sperm tails 3B [Source:RGD Symbol;Acc:1564322]	-3.16017	-2.39496
Olr1353	olfactory receptor 1353 [Source:RGD Symbol;Acc:1333848]	-3.05252	-3.29436
Olr59	olfactory receptor 59 [Source:RGD Symbol;Acc:628858]	-1.59107	-2.53151
Pld1	phospholipase D1 [Source:RGD Symbol;Acc:3349]	-1.82766	-2.21914
Plin2	perilipin 2 [Source:RGD Symbol;Acc:728889]	-1.59107	-2.56685
Ppp1r3c	protein phosphatase 1, regulatory subunit 3C [Source:RGD Symbol;Acc:1309132]	-1.71713	-2.46229
Rab38	RAB38, member RAS oncogene family [Source:RGD Symbol;Acc:628752]	-1.65864	-2.25012
RGD1559960	similar to Sulfotransferase K1 (rSULT1C2) [Source:RGD Symbol;Acc:1559960]	-4.43828	-1.6358
RGD1564865	similar to 20-alpha-hydroxysteroid dehydrogenase [Source:RGD Symbol;Acc:1564865]	-1.8025	-1.91853
RGD1565616	RGD1565616 [Source:RGD Symbol;Acc:1565616]	-1.90528	-1.76541
Rmdn2	regulator of microtubule dynamics 2 [Source:RGD Symbol;Acc:1559836]	-1.56917	-1.8025
Rup2	urinary protein 2 [Source:RGD Symbol;Acc:1561250]	-1.60214	-1.85318
Slc16a4	solute carrier family 16, member 4 [Source:RGD Symbol;Acc:1359655]	-2.49666	-1.75321
Slc22a8	solute carrier family 22 member 8 [Source:RGD Symbol;Acc:632286]	-4.11246	-2.28153
Slc28a2	solute carrier family 28 member 2 [Source:RGD Symbol;Acc:61840]	-1.75321	-2.12874
Srms	src-related kinase lacking C-terminal regulatory tyrosine and N-terminal myristylation sites [Source:RGD Symbol;Acc:1306602]	-2.63902	-9.57983
St6galnac4	ST6 N-acetylgalactosaminide alpha-2,6-sialyltransferase 4 [Source:RGD Symbol;Acc:1303005]	-1.84038	-1.68179
St8sia1	ST8 alpha-N-acetyl-neuraminide alpha-2,8-sialyltransferase 1 [Source:RGD Symbol;Acc:3679]	-3.73213	-3.83706
Steap3	STEAP3 metalloreductase [Source:RGD Symbol;Acc:708552]	-1.8025	-1.60214
Sult1e1	sulfotransferase family 1E member 1 [Source:RGD Symbol;Acc:3776]	-2.39496	-1.72907
Trim2	tripartite motif-containing 2 [Source:RGD Symbol;Acc:1310981]	-1.98618	-1.68179
Tsc22d1	TSC22 domain family, member 1 [Source:RGD Symbol;Acc:3850]	-1.6245	-2.14355
Tubb2a	tubulin, beta 2A class IIa [Source:RGD Symbol;Acc:1588452]	-2.42839	-2.86791
Tymp	thymidine phosphorylase [Source:RGD Symbol;Acc:1305756]	-2.05623	-2.9897
