# Supplementary material for: Co-regulation of Nr1d1 and Pparα in age-related changes of lipid metabolism and its modulation by calorie restriction
Source: Aging (Albany NY). 2025 Jul 28;17(7):1810–33. doi: 10.18632/aging.206289 (PMC12339034; doi:10.18632/aging.206289)
Supplement: Supplementary Table 5 [file aging-17-206289-s006.xlsx]

## Sheet: Sheet1
Supplementary Table 5. Network analysis of the PPI network constructed with genes related to the circadian rhythm and lipid metabolism and age-affected DEGs.
Gene	Degree	Betweenness Centrality
CFTR	184	0.158616
MYC	163	0.103854
APP	159	0.15614
EGFR	147	0.113408
MAPT	116	0.0696677
HSPA8	114	0.0719601
ESR1	91	0.042329
DDX58	88	0.0569112
LRRK2	79	0.0263392
JUN	69	0.0214617
SRC	67	0.0430636
FASN	66	0.0230361
APEX1	61	0.0343301
HSPB1	53	0.0191267
EGLN3	52	0.0161619
PDHA1	47	0.00818221
KIF20A	46	0.0133552
HADHB	42	0.00912674
ACACA	41	0.00990812
PRKCA	40	0.0191391
PPP2CA	39	0.0116836
SIRT1	39	0.0109947
FOXO1	39	0.00927943
ANXA2	36	0.0125189
RPS6	36	0.0100705
APOE	35	0.0106785
APOA1	35	0.00799763
CBX3	34	0.00690834
RHOF	34	0.00453451
ACLY	34	0.00363163
PHGDH	33	0.00484795
RHOC	32	0.0107117
PRKAA2	32	0.00591514
GSN	30	0.0122997
LDLR	30	0.0075151
ISG15	29	0.0102437
FKBP5	29	0.00959963
IKBKG	29	0.00927832
SREBF2	29	0.00876549
PPARG	29	0.00608821
PRKAB1	29	0.00600873
SIRT6	29	0.00411162
SIRT7	29	0.0015994
APOB	28	0.0102337
CHD3	28	0.00387563
ACTN1	28	0.0038293
ACAA2	28	0.00288242
ACAT1	28	0.00259623
PRKAA1	28	0.00254509
PDGFRA	27	0.0131975
RTN4	27	0.00948844
GOT1	27	0.0094722
APOA2	27	0.00575462
ACAT2	27	0.00370741
IGF2BP3	27	0.00366644
TOP2A	27	0.00296248
CRY1	27	0.00215913
TRIP6	26	0.0080084
DSG2	26	0.00538925
ECHS1	26	0.00297674
LRP1	25	0.0137032
IFITM3	25	0.00873274
RB1	25	0.00759628
MEOX2	25	0.00682908
PRKAB2	25	0.00463431
TPM1	25	0.00439798
HMGCS1	25	0.00369044
NAMPT	24	0.00419681
PRKAG1	24	0.00313007
MAP1B	24	0.00289469
FOXO3	24	0.00220078
ARNT	23	0.00350577
ACAA1	23	0.00227262
PER2	23	0.00204629
SLC25A13	23	0.00201306
TUBB2A	23	0.00164051
TRAF1	22	0.00497486
USP2	22	0.00431006
OAT	22	0.00226071
HMGCR	22	0.00222362
NUPR1	22	0.0018879
ACACB	22	0.00178619
MCC	22	0.00168244
TMEM106A	21	0.0123788
POR	21	0.00742815
GPI	21	0.00548649
ALDH18A1	21	0.00287636
MAP2K3	21	0.00195835
CNP	21	0.00176532
LPL	20	0.00742527
LGALS3	20	0.00671343
TLE3	20	0.00606754
KIFC3	20	0.00580955
FAS	20	0.0044551
PEX5	20	0.00322324
CCND1	20	0.0021936
PPP2R1B	20	0.00190173
RND2	20	0.00168908
BCL6	19	0.00560814
AXL	19	0.00370624
NOTCH2	19	0.00337396
PRKAG3	19	0.00300694
GSTP1	19	0.00298814
APOC3	19	0.00236792
RND3	19	0.00225515
BHLHE40	19	0.00215531
APOH	19	0.00178365
ASXL2	19	0.00125786
GLUL	18	0.00680154
ACADVL	18	0.00348442
ELOVL5	18	0.00339766
G6PD	18	0.00308246
ACOX1	18	0.0030496
ALDH1B1	18	0.00295939
CYP1A1	18	0.00218843
LETM1	18	0.00211034
APOA4	18	0.00144896
APOA5	18	0.00142084
CPT1A	17	0.00578323
GNAI1	17	0.00483768
PPARA	17	0.00421187
SLC16A11	17	0.00333281
LGALS3BP	17	0.00307598
STAT5B	17	0.00235276
PDGFRB	17	0.00208239
NR4A1	17	0.00160061
CLPX	17	0.00138905
APOC2	17	0.00130727
ARHGAP24	17	0.00113814
SREBF1	17	0.000733233
PRKAG2	17	0.000667986
HOOK2	16	0.00780267
NR1D2	16	0.00359394
NR1H3	16	0.00306544
MAP3K5	16	0.00254082
RC3H1	16	0.00213312
PRKCE	16	0.00207595
PRPH	16	0.00176004
YTHDC2	16	0.00117522
ROR2	16	0.0011337
KRT10	16	0.00107899
APOM	16	0.000515794
APOD	15	0.00755474
FGFR2	15	0.00564993
HSD3B7	15	0.00333723
KIF22	15	0.00278319
YME1L1	15	0.00263693
SIRT2	15	0.00248541
SCD	15	0.002186
RPL36AL	15	0.00138731
TRIM24	15	0.00138183
ACOX3	15	0.00102067
PYGB	15	0.000938112
ARNTL	15	0.000882572
CD3EAP	15	0.000513717
HMGCL	15	0.000500489
APOC1	15	0.000325601
NT5E	14	0.00707847
PLIN3	14	0.00353618
SCCPDH	14	0.00352078
IRF7	14	0.00329283
ITSN1	14	0.00191751
SOCS3	14	0.00147319
JAK3	14	0.00135662
HADH	14	0.000414277
ACADM	14	0.00038347
ASAH1	13	0.005554
STEAP3	13	0.00313271
SCARB1	13	0.00295468
EIF2AK3	13	0.00269962
KRT19	13	0.00235364
SQLE	13	0.00223114
NR1D1	13	0.00201603
LSS	13	0.00195683
ITGB3	13	0.00161867
EGF	13	0.00115753
MYBL2	13	0.000994761
DAB1	13	0.000957837
SIRT3	13	0.000616234
FABP5	13	0.000610398
LARP4B	13	0.000508217
SCP2	13	0.000490762
RRP9	13	0.000380815
BHLHE41	13	0.000317674
CETP	13	9.70449e-05
SKIL	12	0.00813314
S1PR1	12	0.00442196
CBS	12	0.00371635
PCBP3	12	0.00363954
HLTF	12	0.00342515
CLIC4	12	0.00328237
HMOX1	12	0.00293755
MAFB	12	0.00282092
IGHM	12	0.00208808
NFIL3	12	0.00163998
ECHDC1	12	0.001162
CERS3	12	0.00110471
CCDC120	12	0.00102475
PPARD	12	0.000892782
LIPE	12	0.000466017
SIRT4	12	0.000287023
ACSS2	12	0.000219845
APOL1	12	6.43075e-05
PON1	12	2.99195e-05
RETSAT	11	0.00993096
RLIM	11	0.00613019
BDNF	11	0.00562677
SPSB4	11	0.00322543
MSMO1	11	0.00308812
PDGFB	11	0.0029978
ATP2B2	11	0.00291299
XIAP	11	0.00291077
CRYAB	11	0.00274855
PLPP2	11	0.00266725
MLXIPL	11	0.00178072
MPDZ	11	0.0015194
ACSL1	11	0.0013884
SOCS2	11	0.00124921
HSD17B7	11	0.00108933
KNSTRN	11	0.00102592
TSC22D1	11	0.000985566
NNMT	11	0.00076477
E2F3	11	0.000613993
SPECC1	11	0.000592387
CYP1A2	11	0.000525793
NR1H2	11	0.000487859
HMGCS2	11	0.000464411
NAB2	11	0.000458057
RPL39	11	0.000420386
HMGN5	11	0.000417439
KLF16	11	0.000253542
NCBP2	11	0.000194582
NPAS2	11	0.000134231
FBLN1	10	0.00414893
TMEM30B	10	0.00388168
PLD1	10	0.00363308
SLC30A2	10	0.00360191
CCDC146	10	0.00287553
POLD2	10	0.00230351
JPH3	10	0.00229293
FAM210B	10	0.0020625
THEM6	10	0.00162383
PTN	10	0.00160728
PSAT1	10	0.00160521
CYP1B1	10	0.0012875
PPL	10	0.00114135
ETV6	10	0.00111318
TMOD1	10	0.00110833
CXCL9	10	0.00106365
DCN	10	0.00101213
SLC27A4	10	0.000988498
GADD45A	10	0.0009537
MCM10	10	0.000941696
LIMS1	10	0.000926292
UCHL3	10	0.000845499
CEP128	10	0.000666923
PPP2R2D	10	0.000645231
AKR1C3	10	0.000393408
BBX	10	0.000243816
TOPBP1	10	0.0002246
CSRP1	10	8.28337e-05
FFAR2	9	0.00402447
LPA	9	0.00233473
UGCG	9	0.00193854
ITPR2	9	0.0015894
C1QA	9	0.00141566
ZBTB16	9	0.00128689
PTK6	9	0.00118625
PISD	9	0.00110959
PARD6B	9	0.000735419
CD63	9	0.000689725
CYP17A1	9	0.000658879
CDR2	9	0.000612211
PLPP4	9	0.000595885
LIMK2	9	0.000589234
MTF2	9	0.000581219
CYP7A1	9	0.000563704
MAPK8IP1	9	0.000503374
BCL2L11	9	0.000494536
ELAVL2	9	0.000480572
DOCK5	9	0.000467043
TNFRSF1B	9	0.000448943
CERS6	9	0.000421591
CD9	9	0.000387981
GEM	9	0.000368499
SLC6A8	9	0.000345961
NHP2	9	0.000327531
CPNE3	9	0.00031563
GSS	9	0.000296673
ABHD10	9	0.000286194
UNC5B	9	0.000189616
OASL	9	0.000144697
APOC4	9	5.28756e-05
PER3	9	0
MYADM	8	0.00374824
GJB1	8	0.00333136
SPP1	8	0.00310536
CCDC167	8	0.00305836
LRP6	8	0.00304474
HAL	8	0.00293
BACH1	8	0.00271863
KNG1	8	0.00240054
PNPLA2	8	0.00239442
SLC7A2	8	0.00189825
HSD17B2	8	0.00188178
SMAD7	8	0.00167526
ALDH1A1	8	0.00148513
ATF3	8	0.00134287
ADAM33	8	0.000942984
BDH1	8	0.000915061
CISH	8	0.000660447
INSIG2	8	0.000581464
GDPD1	8	0.000546445
PKMYT1	8	0.000512588
IVD	8	0.000425819
COL5A1	8	0.000377564
MAFF	8	0.000374381
MVD	8	0.000299359
ATXN7L1	8	0.000295385
SNRPN	8	0.000292999
CDKN2B	8	0.000290596
CCNE1	8	0.00026221
MAP3K6	8	0.00024303
TCHP	8	0.000235567
IDI1	8	0.000228346
AACS	8	5.88157e-05
KCTD15	7	0.00512425
LCN2	7	0.00301562
APOL2	7	0.00277006
WNT7A	7	0.00258469
HECTD4	7	0.00249953
CPT2	7	0.00241886
ADAMTS1	7	0.00207779
ANXA8	7	0.00202965
CHCHD6	7	0.00200545
TYMP	7	0.00181164
NRG1	7	0.00158527
ATXN7	7	0.0014799
TBCB	7	0.00135055
FBP2	7	0.00127921
HMGB3	7	0.000789247
AMACR	7	0.000747853
KIF5A	7	0.000744255
CCL21	7	0.000718148
SRM	7	0.000653355
MEST	7	0.000641078
IL15	7	0.000604568
PLXNA3	7	0.000572824
PSEN2	7	0.000543394
JAG2	7	0.000523954
STXBP4	7	0.000485214
BDH2	7	0.000410642
PROM1	7	0.000408851
LOXL4	7	0.000371526
SEPTIN9	7	0.000353445
GADD45B	7	0.00033269
KLF12	7	0.000315771
CREM	7	0.000302997
TNKS	7	0.000298722
JUNB	7	0.000297259
NTRK2	7	0.000297099
SLC25A51	7	0.000291826
EIF4EBP1	7	0.000279714
ABCG5	7	0.000248171
ZNF48	7	0.000241336
FAM50A	7	0.000240084
TSC22D3	7	0.000234029
ATG13	7	0.000203855
FGFR1OP	7	0.000169384
BRMS1L	7	0.000141525
ZBTB38	7	7.2398e-05
OTC	7	6.90934e-06
APOF	7	2.22916e-06
GLB1L2	6	0.00308924
GPR37	6	0.00264777
PCSK5	6	0.00261841
CETN3	6	0.0023519
COL14A1	6	0.00215998
ALDH1L1	6	0.00166949
COL4A2	6	0.00147739
PDCD5	6	0.00108868
ETV3	6	0.00107348
CTDSP2	6	0.000904501
SEMA4F	6	0.000903453
NPC1L1	6	0.000794774
NECTIN2	6	0.000713004
ZDHHC23	6	0.000660486
GSTA3	6	0.000620109
CA6	6	0.000539086
RAMP2	6	0.00053701
LUM	6	0.000517589
MAPKAPK2	6	0.000504738
CCL19	6	0.000501063
PTGS2	6	0.00044045
SLC1A3	6	0.000408774
FAT4	6	0.000403743
ADAM15	6	0.00040277
PSMD9	6	0.000377406
CTDSPL	6	0.000369133
EFNA5	6	0.000360071
LOX	6	0.000352124
BMF	6	0.000344917
COL4A1	6	0.000324484
CXCL11	6	0.000313529
EFEMP1	6	0.000302072
MIIP	6	0.000292528
SESN2	6	0.000281201
TMEM86B	6	0.000251197
HIPK3	6	0.000225593
COL3A1	6	0.000209019
ARNTL2	6	0.000172691
PLA2G7	6	0.000154233
AMHR2	6	0.000145519
PTPDC1	6	0.000142754
CD93	6	0.000132105
SIRT5	6	0.000127609
PAPSS2	6	0.000116347
AASS	6	0.000104732
ABCG8	6	0.000100347
EGR1	6	9.85762e-05
CDKN1C	6	9.37e-05
SLITRK5	6	9.07252e-05
ELF3	6	7.90027e-05
PDLIM4	6	6.3598e-05
NOL8	6	2.66499e-05
DUSP7	6	2.12056e-05
SYNE4	5	0.00528891
ATP11C	5	0.00362206
DYNC2H1	5	0.00321194
LPAR3	5	0.00275349
GRIA3	5	0.00243645
HPD	5	0.00238801
KYNU	5	0.00236461
JADE1	5	0.00235123
SEMA3C	5	0.00179753
SYT2	5	0.000918447
TAT	5	0.00079763
MKNK2	5	0.000773129
CXCL14	5	0.00065081
NEK8	5	0.000593283
TAX1BP3	5	0.000498214
AKR1C1	5	0.000441321
NRP2	5	0.000424322
PLP2	5	0.000385983
CXCL1	5	0.000369299
CEP97	5	0.000334355
PLEKHO2	5	0.000328248
KLF6	5	0.000260947
BCL2A1	5	0.000249037
SPINT1	5	0.000224367
LIN7A	5	0.000216118
SLC20A1	5	0.000201708
SIK1	5	0.000173136
PRDM1	5	0.000165377
AKR1C2	5	0.000159288
CENPT	5	0.000155996
CP	5	0.000155645
MATK	5	0.000136705
AGTPBP1	5	0.00013167
ADIPOR2	5	0.00012973
TRMT44	5	0.000128467
SMPD3	5	0.000123425
VPS37B	5	0.00010349
CYP26A1	5	9.86271e-05
SNTB1	5	9.41384e-05
DUSP13	5	8.72925e-05
ARRDC3	5	6.81879e-05
GTSE1	5	5.33868e-05
PRDM6	5	5.16199e-05
ARHGAP5	5	4.54233e-05
AKAP2	5	4.15218e-05
PRLR	5	2.73195e-05
FOXO4	5	2.60091e-05
WEE1	5	8.88022e-06
IL2RB	5	7.76872e-06
ACER2	5	0
TTC7B	4	0.00241497
CMTM6	4	0.00240951
PPP1R3C	4	0.00240372
CABP2	4	0.00238469
INVS	4	0.00236778
C5AR2	4	0.00236217
POLE2	4	0.00235142
CERCAM	4	0.00122486
RAB38	4	0.000614709
GPAT4	4	0.000590766
FMOD	4	0.000571316
PTCD2	4	0.000548007
TMED5	4	0.000463992
PROCR	4	0.000451235
FAM3C	4	0.000416137
ABCA2	4	0.000404632
HTATIP2	4	0.000287247
NECTIN3	4	0.00028398
CGREF1	4	0.000283963
HACL1	4	0.000233555
UPP2	4	0.000192049
BTG3	4	0.000187339
FAM117B	4	0.000161203
TSPO	4	0.000155988
MAPK1IP1L	4	0.000150571
EPCAM	4	0.000125614
ABCG1	4	0.000118939
CASP12	4	0.00011004
CDH13	4	0.000106034
ACP5	4	0.000103581
PLIN2	4	9.09411e-05
RGS14	4	8.77719e-05
RNF144A	4	8.57633e-05
DHTKD1	4	8.32124e-05
EXPH5	4	8.30942e-05
FABP1	4	8.19308e-05
ASAP2	4	7.43943e-05
PHC3	4	7.43663e-05
ANXA13	4	6.1073e-05
WSB1	4	5.34846e-05
DGAT2	4	5.21097e-05
HDAC11	4	5.19243e-05
FOXO6	4	5.06953e-05
ARHGEF16	4	4.91416e-05
LHX2	4	4.89973e-05
TRIM2	4	4.80567e-05
NT5C3B	4	4.72412e-05
RHOBTB1	4	4.29629e-05
LLGL2	4	4.03255e-05
PNPLA3	4	3.92892e-05
MASTL	4	3.79745e-05
EPHA3	4	3.54194e-05
AURKC	4	2.02322e-05
SYNPO2	4	1.95366e-05
MTF1	4	1.86914e-05
ATP6V1D	4	1.08981e-05
SULT1E1	4	7.24576e-06
UBTD2	3	0.00238141
HSF4	3	0.00235195
DBP	3	0.00235141
NXN	3	0.00233372
GRID1	3	0.000879047
BCAN	3	0.000760858
FUT4	3	0.000531579
OAF	3	0.000461178
ANKRD12	3	0.000319835
MPZL2	3	0.000280342
VPS13C	3	0.000261296
NIPA1	3	0.000255265
LIMS2	3	0.000230224
PCDH1	3	0.000226506
SH3RF1	3	0.000194767
BOK	3	0.00015498
PHYH	3	0.000149793
TNFRSF12A	3	0.000142973
PHF19	3	0.000141341
ACPP	3	0.00013915
IREB2	3	0.000126925
ISG20	3	0.000120984
TSPAN33	3	0.000118931
CCDC68	3	0.000118381
TENM2	3	9.46154e-05
TET3	3	9.36107e-05
PLPPR1	3	8.92224e-05
CLDN2	3	8.73956e-05
LZTFL1	3	8.43176e-05
GCNT2	3	8.29664e-05
MOCS1	3	8.08128e-05
CRYL1	3	7.74986e-05
SLC6A6	3	7.25312e-05
RIC3	3	7.18791e-05
GAS6	3	7.17496e-05
RASL10B	3	6.93525e-05
LBP	3	6.66625e-05
SSTR3	3	6.65172e-05
PARP11	3	6.56137e-05
ADORA1	3	6.05531e-05
CCNG1	3	6.04548e-05
IFRD2	3	6.00115e-05
LURAP1L	3	5.75226e-05
BACE1	3	5.72376e-05
ADORA2B	3	5.46328e-05
C2CD2	3	5.37975e-05
MOGAT2	3	5.37572e-05
GDF15	3	5.28099e-05
CHKA	3	4.66421e-05
RNF125	3	4.43974e-05
TIFA	3	4.21936e-05
MMP15	3	4.18235e-05
SERPINE1	3	4.16643e-05
DMXL2	3	4.01631e-05
REV1	3	3.61432e-05
MX2	3	3.44447e-05
MCTP2	3	3.36607e-05
PLA1A	3	3.19183e-05
INAVA	3	3.08899e-05
ADAMTS7	3	2.59755e-05
GPD1	3	2.58753e-05
MARCHF6	3	2.56206e-05
CIDEA	3	2.53439e-05
SOX12	3	2.23572e-05
SEMA6D	3	2.20241e-05
CIB2	3	1.96762e-05
PDE4B	3	1.91029e-05
PKLR	3	1.90706e-05
BHMT	3	1.80377e-05
SALL1	3	1.59306e-05
CDKL2	3	1.52499e-05
PPFIA2	3	1.50501e-05
SRMS	3	1.43266e-05
GLS2	3	1.4103e-05
TRPM4	3	1.34987e-05
KIF12	3	1.17233e-05
DDAH1	3	1.10743e-05
ADH6	3	1.04479e-05
SLC6A9	3	1.03614e-05
G6PC	3	1.00103e-05
TPD52L1	3	7.91805e-06
PARVB	3	6.09024e-06
NDRG2	3	4.97305e-06
KLF10	3	1.63903e-06
CAP2	3	0
CEND1	3	0
IMPA2	3	0
LPIN2	3	0
RGS16	3	0
TRPV4	3	0
CPNE4	2	0.00233372
IL17RB	2	0.00233372
KLRG1	2	0.00233372
MC4R	2	0.00233372
MREG	2	0.00062576
SULT1C2	2	0.000542998
ALPK1	2	0.000311397
UHMK1	2	0.000221526
SLC22A8	2	0.000217662
IGFBP2	2	0.000200741
HOXA3	2	0.000152935
CD52	2	0.000150862
SPOCK2	2	0.00011753
PHLDA2	2	0.000115185
EEPD1	2	0.000107186
FABP7	2	9.35193e-05
ME1	2	9.25117e-05
IRX5	2	8.12241e-05
MMRN1	2	6.31889e-05
ENTPD7	2	5.67726e-05
ST8SIA1	2	5.43483e-05
PLA2G4C	2	5.13928e-05
BOC	2	4.68355e-05
HAO2	2	4.43314e-05
DCUN1D2	2	4.04536e-05
SLC2A5	2	3.90195e-05
SULT4A1	2	3.87733e-05
COL9A3	2	3.61432e-05
CYP46A1	2	3.44092e-05
ST8SIA3	2	3.35955e-05
IL10RA	2	3.09712e-05
SUSD4	2	3.04692e-05
MINDY2	2	3.00466e-05
ABCC3	2	2.99367e-05
SLC25A25	2	2.98363e-05
ADAM8	2	2.81653e-05
SLC13A4	2	2.7671e-05
GCKR	2	2.74013e-05
SYNJ2	2	2.5939e-05
NIM1K	2	2.57135e-05
FLI1	2	2.29419e-05
TNFRSF21	2	2.27842e-05
MS4A6E	2	2.27041e-05
ENPP2	2	2.04561e-05
LRRC4C	2	2.03343e-05
TTC25	2	1.93604e-05
ALPL	2	1.89452e-05
PPM1K	2	1.88789e-05
HERC6	2	1.83261e-05
SVEP1	2	1.77203e-05
MOAP1	2	1.62601e-05
ACOT4	2	1.5708e-05
CYP7B1	2	1.34316e-05
NMRK1	2	1.27432e-05
SLC30A3	2	1.25325e-05
TOB2	2	1.13068e-05
PNPLA5	2	1.09902e-05
CORO6	2	1.08478e-05
ABCC2	2	1.07585e-05
AGT	2	1.05911e-05
LILRB3	2	9.45277e-06
NKG7	2	8.88433e-06
SMIM22	2	8.71095e-06
ANKRD22	2	7.97208e-06
VNN1	2	7.54614e-06
SLC25A48	2	7.27838e-06
ROMO1	2	6.33159e-06
POU3F3	2	5.43652e-06
LGSN	2	4.77617e-06
SAMD11	2	4.58219e-06
CACNB4	2	4.40804e-06
PRSS12	2	4.25175e-06
FOXQ1	2	3.7122e-06
MOK	2	3.51495e-06
CLDN1	2	3.40175e-06
TNNC1	2	2.30374e-06
ARHGEF3	2	0
CD300LF	2	0
CIART	2	0
CMPK2	2	0
CYP2U1	2	0
DIPK2A	2	0
GIMAP8	2	0
GNAT2	2	0
GRHL2	2	0
IGFN1	2	0
MICAL3	2	0
MOB1B	2	0
PLEK2	2	0
PRSS8	2	0
RELN	2	0
SCARF2	2	0
SLC1A2	2	0
THBS4	2	0
THRSP	2	0
WDR86	2	0
ACMSD	1	0
ACSM3	1	0
ACSM5	1	0
ADAM11	1	0
ADAMTSL2	1	0
ADGRV1	1	0
ALS2CL	1	0
AMDHD1	1	0
ANKEF1	1	0
APOL3	1	0
APOL5	1	0
ARHGAP30	1	0
ARHGAP42	1	0
ARMCX1	1	0
ARRDC2	1	0
ATP10A	1	0
ATRNL1	1	0
B9D1	1	0
BMERB1	1	0
BMP7	1	0
CA3	1	0
CABCOCO1	1	0
CAND2	1	0
CCDC127	1	0
CCDC141	1	0
CD163	1	0
CD200	1	0
CD7	1	0
CDH17	1	0
CDKL4	1	0
CELA1	1	0
CEMIP	1	0
CES4A	1	0
CHPF	1	0
CLDN23	1	0
CLIC2	1	0
CRYM	1	0
CSMD1	1	0
DEXI	1	0
DNASE2	1	0
DPP6	1	0
DUSP26	1	0
ELL3	1	0
ENC1	1	0
ENPP5	1	0
FAM111A	1	0
FFAR4	1	0
FGF1	1	0
FGF21	1	0
FMO5	1	0
GALR3	1	0
GALT	1	0
GLT1D1	1	0
GPBAR1	1	0
GRIP2	1	0
HAMP	1	0
HGD	1	0
IL17RE	1	0
INSYN1	1	0
JADE2	1	0
JCAD	1	0
JMY	1	0
KCNJ3	1	0
KISS1	1	0
KMO	1	0
LAG3	1	0
LRRC24	1	0
LTC4S	1	0
MC3R	1	0
MCF2L	1	0
MEIOB	1	0
METTL7B	1	0
MPPED1	1	0
MPV17L	1	0
MRPL36	1	0
MTTP	1	0
NAA11	1	0
NCAM2	1	0
NEURL3	1	0
NHLRC1	1	0
NOCT	1	0
NOTUM	1	0
NR2C2AP	1	0
NREP	1	0
OPLAH	1	0
P2RX5	1	0
PARPBP	1	0
PCP4L1	1	0
PCSK6	1	0
PDE8B	1	0
PITPNM3	1	0
PKD1L2	1	0
POPDC2	1	0
POU3F1	1	0
PPM1J	1	0
PPP4R4	1	0
PRR32	1	0
PRTG	1	0
RAB7B	1	0
RASGEF1B	1	0
RBBP8NL	1	0
RFXAP	1	0
RGN	1	0
RHPN1	1	0
RTN4RL1	1	0
S100PBP	1	0
SARM1	1	0
SCTR	1	0
SDHAF1	1	0
SDS	1	0
SERINC5	1	0
SEZ6	1	0
SLC13A5	1	0
SLC19A2	1	0
SLC22A6	1	0
SLC44A4	1	0
SLC46A1	1	0
SRRD	1	0
ST3GAL3	1	0
ST6GALNAC4	1	0
STAC3	1	0
STX1B	1	0
SYTL2	1	0
TAF4B	1	0
TAS1R1	1	0
TCP11L2	1	0
TEF	1	0
TENT4A	1	0
TLE6	1	0
TRHDE	1	0
TSPAN12	1	0
UBD	1	0
UNC5A	1	0
UNC5D	1	0
VSIR	1	0
VXN	1	0
ZDHHC2	1	0
ZFP90	1	0
ZP2	1	0
