# Supplementary material for: Co-regulation of Nr1d1 and Pparα in age-related changes of lipid metabolism and its modulation by calorie restriction
Source: Aging (Albany NY). 2025 Jul 28;17(7):1810–33. doi: 10.18632/aging.206289 (PMC12339034; doi:10.18632/aging.206289)
Supplement: Supplementary Table 6 [file aging-17-206289-s007.xlsx]

## Sheet: Table S8
Supplementary Table 6. Genes ranked using the Random Walk with Restart (RWR) algorithm on the PPI network with Nr1d1 as the seed node.
	Gene	RWR Score
1	CRY1	0.0140195
2	PER2	0.0139802
3	BHLHE40	0.0139705
4	NR1D2	0.0139666
5	ARNTL	0.0139354
6	BHLHE41	0.0138938
7	NFIL3	0.0138643
8	NPAS2	0.0138495
9	PER3	0.0137745
10	APP	0.0126127
11	SPSB4	0.0124622
12	BACH1	0.0124495
13	APOA4	0.0123926
14	CFTR	0.000621536
15	ARNTL2	0.000553832
16	MAFF	0.000546411
17	SIRT1	0.000544423
18	KIF5A	0.000541583
19	PPP2R1B	0.000477758
20	DDX58	0.00042161
21	PCSK5	0.000406329
22	JUN	0.000388579
23	EGLN3	0.000355138
24	GSN	0.000321018
25	MYC	0.000320418
26	MAFB	0.000319815
27	SOCS2	0.000316776
28	TAF4B	0.000311239
29	PRKAA1	0.000275784
30	FASN	0.000261439
31	ARNT	0.000259437
32	CHCHD6	0.00024401
33	DOCK5	0.000235803
34	DSG2	0.000233851
35	CD9	0.000229163
36	PCDH1	0.00022751
37	FAT4	0.000227467
38	ACSM3	0.000226585
39	MEOX2	0.000220864
40	MKNK2	0.00021565
41	LLGL2	0.000215338
42	HSPB1	0.000208074
43	DHTKD1	0.000204788
44	NAMPT	0.000203235
45	TRIP6	0.00020187
46	APOA1	0.00019295
47	LRRK2	0.000191049
48	PSMD9	0.000188698
49	APOA2	0.000187814
50	PPP2CA	0.000187216
51	APOE	0.000180577
52	GPR37	0.000176874
53	RGN	0.000174583
54	DAB1	0.000170383
55	FBLN1	0.000168627
56	PPARG	0.000162917
57	APOM	0.000162451
58	APOC3	0.00016184
59	APOB	0.000160833
60	APOC1	0.000160077
61	APOH	0.000159893
62	ACACA	0.000159232
63	APOC2	0.000158499
64	ROR2	0.000158234
65	APOL1	0.000157807
66	CETP	0.000157256
67	CHD3	0.000156004
68	APOA5	0.000155909
69	PON1	0.000153848
70	CREM	0.000151835
71	PRKCA	0.000151055
72	APOF	0.000148953
73	TOB2	0.000148424
74	MCC	0.000144837
75	PLD1	0.000142925
76	GDPD1	0.000141636
77	PRKAB1	0.000134411
78	PPARA	0.000134149
79	GPI	0.000134104
80	ACLY	0.000129893
81	PRKAG2	0.000129417
82	ACTN1	0.000129409
83	G6PD	0.000128189
84	USP2	0.000128152
85	FOXO1	0.000126692
86	RPL39	0.000124231
87	PRKAA2	0.000122926
88	PRKAB2	0.00012231
89	PRKAG1	0.000117463
90	JAK3	0.000115601
91	PRKAG3	0.000114684
92	YTHDC2	0.000113122
93	PRPH	0.000108566
94	KRT10	0.000108384
95	MLXIPL	0.000107516
96	MAPT	8.31e-05
97	EGFR	7.84e-05
98	HSPA8	7.27e-05
99	ESR1	5.87e-05
100	IKBKG	5.25e-05
101	APEX1	4.33e-05
102	SRC	4.14e-05
103	LRP1	4.04e-05
104	LPL	3.59e-05
105	ARHGAP24	3.48e-05
106	FKBP5	3.13e-05
107	ANXA2	3.01e-05
108	IFITM3	2.92e-05
109	SIRT7	2.9e-05
110	SOCS3	2.81e-05
111	STAT5B	2.8e-05
112	PARD6B	2.8e-05
113	RPS6	2.77e-05
114	PDHA1	2.63e-05
115	HADHB	2.58e-05
116	PDGFRB	2.52e-05
117	S1PR1	2.52e-05
118	LGALS3BP	2.51e-05
119	PDGFRA	2.51e-05
120	PHGDH	2.47e-05
121	ASXL2	2.47e-05
122	KIFC3	2.44e-05
123	MAP2K3	2.4e-05
124	NR1H3	2.38e-05
125	KIF20A	2.38e-05
126	SLC25A13	2.31e-05
127	SCARB1	2.31e-05
128	GLUL	2.31e-05
129	OAT	2.28e-05
130	ITGB3	2.28e-05
131	SIRT6	2.27e-05
132	MAP3K5	2.23e-05
133	PRKCE	2.2e-05
134	NNMT	2.18e-05
135	ATF3	2.16e-05
136	KNG1	2.12e-05
137	FOXO3	2.1e-05
138	MCM10	2.1e-05
139	SCD	2.1e-05
140	FGFR2	2.09e-05
141	IGHM	2.09e-05
142	TLE3	2.08e-05
143	LGALS3	2.08e-05
144	KLF12	2.07e-05
145	RHOC	2.05e-05
146	PLIN3	2.04e-05
147	SLC16A11	2.03e-05
148	ACAA2	2.03e-05
149	CRYAB	2.02e-05
150	POR	2.01e-05
151	ITSN1	1.98e-05
152	TMEM106A	1.97e-05
153	TSC22D1	1.94e-05
154	CPT1A	1.94e-05
155	CSRP1	1.93e-05
156	IL15	1.93e-05
157	CDKN2B	1.92e-05
158	PTK6	1.92e-05
159	PTN	1.9e-05
160	RETSAT	1.9e-05
161	MAPK8IP1	1.87e-05
162	ABHD10	1.87e-05
163	ANXA8	1.86e-05
164	ATG13	1.86e-05
165	SIRT5	1.86e-05
166	HADH	1.85e-05
167	BCL2L11	1.85e-05
168	CIART	1.85e-05
169	RELN	1.85e-05
170	ZDHHC23	1.84e-05
171	EGF	1.84e-05
172	BBX	1.84e-05
173	PSEN2	1.83e-05
174	BDH1	1.83e-05
175	DCN	1.83e-05
176	COL4A2	1.82e-05
177	KLF6	1.82e-05
178	PSAT1	1.82e-05
179	ALDH18A1	1.81e-05
180	LSS	1.79e-05
181	LURAP1L	1.79e-05
182	CDKL2	1.79e-05
183	LUM	1.78e-05
184	PPP1R3C	1.78e-05
185	CCNG1	1.78e-05
186	FAM50A	1.77e-05
187	ECHDC1	1.77e-05
188	PTGS2	1.76e-05
189	NMRK1	1.76e-05
190	RAB38	1.74e-05
191	PAPSS2	1.74e-05
192	TET3	1.73e-05
193	GJB1	1.73e-05
194	COL14A1	1.73e-05
195	ACACB	1.73e-05
196	CBX3	1.72e-05
197	RHOF	1.72e-05
198	PLEKHO2	1.72e-05
199	BDNF	1.72e-05
200	CHKA	1.72e-05
201	CENPT	1.72e-05
202	COL4A1	1.72e-05
203	TMEM30B	1.71e-05
204	MEST	1.71e-05
205	LCN2	1.7e-05
206	IFRD2	1.7e-05
207	LIN7A	1.69e-05
208	RASL10B	1.68e-05
209	NRG1	1.67e-05
210	ETV3	1.66e-05
211	BCL2A1	1.66e-05
212	TRIM2	1.65e-05
213	HMGCS2	1.65e-05
214	LIMS2	1.64e-05
215	MCTP2	1.64e-05
216	SYNE4	1.64e-05
217	GIMAP8	1.63e-05
218	MOB1B	1.63e-05
219	PTCD2	1.63e-05
220	BACE1	1.63e-05
221	UGCG	1.63e-05
222	GNAT2	1.63e-05
223	THBS4	1.62e-05
224	PLA1A	1.62e-05
225	GSTA3	1.62e-05
226	RGS14	1.61e-05
227	CEND1	1.61e-05
228	SSTR3	1.61e-05
229	CXCL14	1.61e-05
230	LPAR3	1.61e-05
231	EEPD1	1.6e-05
232	BCAN	1.6e-05
233	IREB2	1.6e-05
234	GRHL2	1.6e-05
235	TNFRSF21	1.6e-05
236	CD300LF	1.6e-05
237	PLA2G4C	1.6e-05
238	NIM1K	1.6e-05
239	PHYH	1.6e-05
240	DCUN1D2	1.59e-05
241	KISS1	1.59e-05
242	MPV17L	1.59e-05
243	RAB7B	1.59e-05
244	SLC22A6	1.59e-05
245	TCP11L2	1.59e-05
246	ABCA2	1.56e-05
247	LDLR	1.51e-05
248	RTN4	1.44e-05
249	APOC4	1.36e-05
250	PCSK6	1.35e-05
251	SREBF2	1.23e-05
252	YME1L1	1.23e-05
253	LPA	1.23e-05
254	GOT1	1.22e-05
255	TUBB2A	1.19e-05
256	ISG15	1.18e-05
257	APOD	1.15e-05
258	PLXNA3	1.15e-05
259	LIPE	1.11e-05
260	HMGCR	1.1e-05
261	IGF2BP3	1.06e-05
262	TPM1	1.06e-05
263	SIRT2	1.04e-05
264	NR1H2	1.02e-05
265	RB1	1.02e-05
266	SREBF1	9.82e-06
267	PPP2R2D	9.77e-06
268	IRF7	9.67e-06
269	RPL36AL	9.67e-06
270	PDGFB	9.65e-06
271	RND2	9.63e-06
272	CCL19	9.63e-06
273	KNSTRN	9.49e-06
274	BCL6	9.35e-06
275	NOTCH2	9.3e-06
276	PTPDC1	8.98e-06
277	UNC5B	8.84e-06
278	ACAT2	8.58e-06
279	INVS	8.49e-06
280	MAP1B	8.46e-06
281	ACADM	8.43e-06
282	MPDZ	8.4e-06
283	AXL	8.08e-06
284	CCND1	7.95e-06
285	RND3	7.81e-06
286	NT5E	7.78e-06
287	PISD	7.72e-06
288	PLA2G7	7.71e-06
289	ADAMTS1	7.68e-06
290	SLC25A51	7.64e-06
291	GNAI1	7.5e-06
292	PROCR	7.5e-06
293	ATXN7L1	7.45e-06
294	POLD2	7.32e-06
295	FABP5	7.22e-06
296	ACAT1	7.19e-06
297	NHP2	7.18e-06
298	NUPR1	7.18e-06
299	FAS	7.12e-06
300	TRAF1	6.91e-06
301	LETM1	6.88e-06
302	WNT7A	6.86e-06
303	TOP2A	6.83e-06
304	PRLR	6.66e-06
305	NECTIN3	6.45e-06
306	NTRK2	6.42e-06
307	ECHS1	6.37e-06
308	FABP1	6.36e-06
309	ALDH1B1	6.27e-06
310	NAB2	6.24e-06
311	FGFR1OP	6.22e-06
312	EPCAM	6.17e-06
313	SKIL	6.06e-06
314	FABP7	6.04e-06
315	CD63	6.03e-06
316	PPM1J	5.9e-06
317	PYGB	5.8e-06
318	KLF16	5.7e-06
319	TENM2	5.61e-06
320	EFEMP1	5.6e-06
321	SCCPDH	5.6e-06
322	ACSL1	5.57e-06
323	KRT19	5.55e-06
324	LARP4B	5.55e-06
325	RC3H1	5.53e-06
326	CLPX	5.47e-06
327	GSTP1	5.42e-06
328	FBP2	5.36e-06
329	TRIM24	5.35e-06
330	ZDHHC2	5.33e-06
331	CBS	5.31e-06
332	TOPBP1	5.31e-06
333	LOXL4	5.27e-06
334	HSD3B7	5.27e-06
335	CD3EAP	5.14e-06
336	SMAD7	5.03e-06
337	NCBP2	5.02e-06
338	GADD45A	4.94e-06
339	CP	4.94e-06
340	CNP	4.83e-06
341	ETV6	4.81e-06
342	NR4A1	4.76e-06
343	VPS37B	4.63e-06
344	ZBTB38	4.55e-06
345	TMOD1	4.42e-06
346	PEX5	4.37e-06
347	ENPP2	4.33e-06
348	MAPKAPK2	4.31e-06
349	MIIP	4.3e-06
350	TMEM86B	4.29e-06
351	JPH3	4.24e-06
352	SPP1	4.22e-06
353	HOOK2	4.19e-06
354	PDCD5	4.15e-06
355	LIMK2	4.13e-06
356	ACOX1	4.1e-06
357	CYP1B1	4.04e-06
358	MTF2	3.97e-06
359	ACAA1	3.95e-06
360	GADD45B	3.93e-06
361	PDLIM4	3.82e-06
362	FOXO4	3.81e-06
363	CCDC120	3.77e-06
364	CPNE3	3.75e-06
365	MYBL2	3.75e-06
366	CISH	3.73e-06
367	ELOVL5	3.73e-06
368	CLIC4	3.63e-06
369	HMGN5	3.6e-06
370	PLPP4	3.58e-06
371	SESN2	3.55e-06
372	DUSP7	3.53e-06
373	SEPTIN9	3.48e-06
374	SIRT3	3.48e-06
375	TRMT44	3.46e-06
376	PDE4B	3.45e-06
377	CCNE1	3.41e-06
378	HMGCS1	3.37e-06
379	ADAMTSL2	3.37e-06
380	STEAP3	3.36e-06
381	G6PC	3.35e-06
382	KYNU	3.32e-06
383	CYP1A1	3.3e-06
384	PCBP3	3.29e-06
385	NECTIN2	3.28e-06
386	MAP3K6	3.26e-06
387	COL5A1	3.22e-06
388	CCL21	3.19e-06
389	APOL2	3.18e-06
390	OASL	3.16e-06
391	LOX	3.14e-06
392	CXCL1	3.13e-06
393	SPECC1	3.12e-06
394	THEM6	3.09e-06
395	KIF22	3.09e-06
396	SNTB1	3.09e-06
397	SYT2	3.07e-06
398	GTSE1	3.06e-06
399	SLC27A4	3.05e-06
400	MVD	3.04e-06
401	PPARD	3.03e-06
402	IL2RB	3.03e-06
403	INSIG2	3.01e-06
404	PPL	3.01e-06
405	SIK1	3.01e-06
406	C5AR2	2.95e-06
407	TSPO	2.9e-06
408	TSC22D3	2.83e-06
409	ANKRD12	2.81e-06
410	LIMS1	2.8e-06
411	ELL3	2.79e-06
412	BMF	2.79e-06
413	RRP9	2.78e-06
414	ZBTB16	2.75e-06
415	ACSS2	2.75e-06
416	PKLR	2.73e-06
417	EGR1	2.73e-06
418	JUNB	2.69e-06
419	ISG20	2.69e-06
420	ITPR2	2.68e-06
421	CCDC146	2.67e-06
422	XIAP	2.67e-06
423	GEM	2.65e-06
424	DUSP13	2.63e-06
425	SIRT4	2.63e-06
426	RHOBTB1	2.62e-06
427	EIF4EBP1	2.59e-06
428	SLC20A1	2.55e-06
429	ABCG1	2.47e-06
430	PRDM1	2.43e-06
431	ATXN7	2.42e-06
432	PNPLA3	2.42e-06
433	MYADM	2.41e-06
434	CXCL9	2.4e-06
435	BRMS1L	2.39e-06
436	CTDSP2	2.38e-06
437	ZNF48	2.38e-06
438	UCHL3	2.38e-06
439	ACADVL	2.37e-06
440	CMTM6	2.36e-06
441	MAPK1IP1L	2.36e-06
442	ADIPOR2	2.34e-06
443	HAL	2.34e-06
444	SCP2	2.32e-06
445	STXBP4	2.28e-06
446	LRP6	2.28e-06
447	PARP11	2.28e-06
448	CEP128	2.27e-06
449	AURKC	2.26e-06
450	HMGB3	2.26e-06
451	WSB1	2.23e-06
452	RNF125	2.23e-06
453	C1QA	2.23e-06
454	SLC6A9	2.22e-06
455	ELAVL2	2.22e-06
456	LBP	2.2e-06
457	HLTF	2.19e-06
458	CEP97	2.17e-06
459	CETN3	2.16e-06
460	CCDC141	2.14e-06
461	SALL1	2.11e-06
462	SLC6A8	2.1e-06
463	TCHP	2.09e-06
464	AKAP2	2.06e-06
465	NPC1L1	2.05e-06
466	EPHA3	2.04e-06
467	BOK	2.01e-06
468	IGFN1	2.01e-06
469	ACOX3	1.98e-06
470	CERS3	1.97e-06
471	CA6	1.96e-06
472	EXPH5	1.95e-06
473	TTC25	1.93e-06
474	UPP2	1.93e-06
475	DYNC2H1	1.93e-06
476	MOAP1	1.9e-06
477	CD93	1.89e-06
478	GSS	1.89e-06
479	EIF2AK3	1.87e-06
480	MASTL	1.87e-06
481	ELF3	1.86e-06
482	TBCB	1.85e-06
483	JAG2	1.83e-06
484	IVD	1.83e-06
485	SUSD4	1.8e-06
486	SRM	1.78e-06
487	VPS13C	1.77e-06
488	CDR2	1.77e-06
489	DMXL2	1.77e-06
490	RLIM	1.74e-06
491	SLC6A6	1.74e-06
492	ATP2B2	1.72e-06
493	MX2	1.72e-06
494	CXCL11	1.71e-06
495	COL3A1	1.71e-06
496	SNRPN	1.69e-06
497	NEK8	1.68e-06
498	JADE1	1.67e-06
499	PKMYT1	1.66e-06
500	HIPK3	1.66e-06
501	RAMP2	1.65e-06
502	ATP6V1D	1.6e-06
503	SMPD3	1.59e-06
504	STAC3	1.58e-06
505	AMHR2	1.56e-06
506	PRDM6	1.56e-06
507	ST6GALNAC4	1.55e-06
508	HMOX1	1.55e-06
509	PLIN2	1.54e-06
510	SPOCK2	1.53e-06
511	HTATIP2	1.53e-06
512	DBP	1.52e-06
513	IRX5	1.51e-06
514	CDH13	1.5e-06
515	AASS	1.49e-06
516	CASP12	1.48e-06
517	SLC7A2	1.48e-06
518	SQLE	1.47e-06
519	NXN	1.46e-06
520	WEE1	1.46e-06
521	REV1	1.46e-06
522	HMGCL	1.43e-06
523	BDH2	1.43e-06
524	MSMO1	1.42e-06
525	ABCG5	1.41e-06
526	FMOD	1.4e-06
527	SERPINE1	1.39e-06
528	ATP11C	1.39e-06
529	PPFIA2	1.39e-06
530	FOXO6	1.37e-06
531	JCAD	1.37e-06
532	RBBP8NL	1.37e-06
533	PHC3	1.36e-06
534	TYMP	1.36e-06
535	E2F3	1.36e-06
536	ADAMTS7	1.35e-06
537	ASAH1	1.33e-06
538	ABCG8	1.33e-06
539	SYNPO2	1.31e-06
540	UBTD2	1.31e-06
541	MATK	1.29e-06
542	LTC4S	1.29e-06
543	FAM117B	1.28e-06
544	FAM210B	1.28e-06
545	HOXA3	1.27e-06
546	EFNA5	1.26e-06
547	KCTD15	1.25e-06
548	PROM1	1.25e-06
549	LZTFL1	1.24e-06
550	SYNJ2	1.24e-06
551	OTC	1.24e-06
552	ADAM15	1.23e-06
553	SLITRK5	1.23e-06
554	SLC46A1	1.21e-06
555	MARCHF6	1.19e-06
556	RIC3	1.19e-06
557	MTF1	1.17e-06
558	CIDEA	1.17e-06
559	SRMS	1.17e-06
560	AGT	1.17e-06
561	SLC1A3	1.17e-06
562	TRPV4	1.15e-06
563	MTTP	1.15e-06
564	FFAR2	1.14e-06
565	KIF12	1.13e-06
566	PLPP2	1.13e-06
567	TNFRSF1B	1.13e-06
568	CCDC167	1.1e-06
569	CERS6	1.09e-06
570	TAX1BP3	1.09e-06
571	WDR86	1.09e-06
572	ARRDC3	1.09e-06
573	PNPLA2	1.08e-06
574	IDI1	1.08e-06
575	PARVB	1.08e-06
576	COL9A3	1.06e-06
577	HSD17B2	1.06e-06
578	FLI1	1.05e-06
579	HECTD4	1.05e-06
580	MMRN1	1.05e-06
581	PLP2	1.04e-06
582	AACS	1.02e-06
583	HSD17B7	1.01e-06
584	NIPA1	1e-06
585	SOX12	9.9e-07
586	NOL8	9.88e-07
587	CYP2U1	9.81e-07
588	ZFP90	9.78e-07
589	UHMK1	9.78e-07
590	CYP1A2	9.76e-07
591	GPAT4	9.66e-07
592	CD52	9.66e-07
593	HACL1	9.65e-07
594	ARHGAP30	9.58e-07
595	NREP	9.58e-07
596	SLC44A4	9.58e-07
597	UBD	9.58e-07
598	THRSP	9.34e-07
599	IMPA2	8.92e-07
600	NHLRC1	8.89e-07
601	TIFA	8.76e-07
602	CGREF1	8.7e-07
603	HDAC11	8.45e-07
604	GCKR	8.14e-07
605	TTC7B	8.06e-07
606	RNF144A	8.03e-07
607	PPP4R4	7.92e-07
608	TAS1R1	7.92e-07
609	CCDC68	7.84e-07
610	SCARF2	7.73e-07
611	TNKS	7.62e-07
612	AMACR	7.58e-07
613	CD163	7.55e-07
614	DEXI	7.55e-07
615	SCTR	7.55e-07
616	ADORA1	7.26e-07
617	SPINT1	7.17e-07
618	GLB1L2	7.11e-07
619	CLDN2	6.99e-07
620	TMED5	6.96e-07
621	MREG	6.87e-07
622	POLE2	6.8e-07
623	CORO6	6.8e-07
624	ALS2CL	6.76e-07
625	CABCOCO1	6.76e-07
626	ENPP5	6.76e-07
627	MC3R	6.76e-07
628	MEIOB	6.76e-07
629	PCP4L1	6.76e-07
630	CIB2	6.7e-07
631	KLRG1	6.68e-07
632	PDE8B	6.5e-07
633	SEMA4F	6.41e-07
634	CERCAM	6.35e-07
635	CTDSPL	6.28e-07
636	MPZL2	6.15e-07
637	ASAP2	6e-07
638	GCNT2	5.99e-07
639	PHF19	5.87e-07
640	HPD	5.85e-07
641	POU3F3	5.72e-07
642	KLF10	5.47e-07
643	ANXA13	5.45e-07
644	SLC25A25	5.41e-07
645	SH3RF1	5.41e-07
646	ARHGAP5	5.31e-07
647	TAT	5.09e-07
648	CLDN1	5.08e-07
649	GPD1	5e-07
650	PLEK2	5e-07
651	MMP15	4.93e-07
652	HAMP	4.85e-07
653	CACNB4	4.82e-07
654	SEMA3C	4.75e-07
655	GDF15	4.75e-07
656	GLS2	4.73e-07
657	ALDH1A1	4.72e-07
658	MOK	4.62e-07
659	ACER2	4.6e-07
660	LPIN2	4.59e-07
661	TSPAN33	4.57e-07
662	AGTPBP1	4.52e-07
663	ALPK1	4.52e-07
664	MOGAT2	4.46e-07
665	TRPM4	4.38e-07
666	CYP26A1	4.36e-07
667	APOL3	4.33e-07
668	CPT2	4.31e-07
669	IL10RA	4.28e-07
670	MINDY2	4.25e-07
671	B9D1	4.24e-07
672	NRP2	4.22e-07
673	SLC22A8	4.18e-07
674	ARHGEF16	4.09e-07
675	NDRG2	4e-07
676	SLC30A2	3.95e-07
677	ARMCX1	3.93e-07
678	GALR3	3.93e-07
679	MRPL36	3.93e-07
680	BTG3	3.93e-07
681	CAP2	3.92e-07
682	SEMA6D	3.86e-07
683	OAF	3.81e-07
684	ADH6	3.74e-07
685	PLPPR1	3.73e-07
686	CYP7A1	3.66e-07
687	IL17RB	3.52e-07
688	TPD52L1	3.52e-07
689	C2CD2	3.47e-07
690	DDAH1	3.46e-07
691	PRTG	3.42e-07
692	CDKN1C	3.42e-07
693	GAS6	3.38e-07
694	ME1	3.25e-07
695	ACP5	3.23e-07
696	NOCT	3.23e-07
697	CYP17A1	3.22e-07
698	HSF4	3.19e-07
699	RGS16	3.19e-07
700	TLE6	3.13e-07
701	LGSN	3.09e-07
702	SVEP1	3.09e-07
703	ADORA2B	3.06e-07
704	GRID1	3.03e-07
705	ADAM33	2.98e-07
706	ACMSD	2.91e-07
707	PRSS12	2.84e-07
708	FAM3C	2.82e-07
709	AKR1C3	2.79e-07
710	FGF1	2.79e-07
711	FGF21	2.79e-07
712	DIPK2A	2.77e-07
713	CELA1	2.73e-07
714	ALPL	2.72e-07
715	ARHGEF3	2.7e-07
716	ALDH1L1	2.7e-07
717	ADAM8	2.66e-07
718	NT5C3B	2.59e-07
719	ACPP	2.57e-07
720	PRSS8	2.53e-07
721	SMIM22	2.51e-07
722	ABCC2	2.49e-07
723	FOXQ1	2.49e-07
724	RFXAP	2.39e-07
725	PNPLA5	2.31e-07
726	LHX2	2.26e-07
727	SAMD11	2.19e-07
728	INAVA	2.19e-07
729	CDKL4	2.16e-07
730	TNFRSF12A	2.13e-07
731	TNNC1	2.12e-07
732	SLC25A48	2.09e-07
733	LAG3	2.08e-07
734	AKR1C2	2.05e-07
735	AKR1C1	2.01e-07
736	CYP46A1	1.99e-07
737	ACOT4	1.97e-07
738	NOTUM	1.96e-07
739	CABP2	1.94e-07
740	ABCC3	1.92e-07
741	BMP7	1.86e-07
742	LRRC24	1.86e-07
743	SLC1A2	1.82e-07
744	BHMT	1.78e-07
745	ADGRV1	1.75e-07
746	IGFBP2	1.74e-07
747	HAO2	1.71e-07
748	MOCS1	1.7e-07
749	FFAR3	1.68e-07
750	SYTL2	1.67e-07
751	DGAT2	1.57e-07
752	FAM111A	1.54e-07
753	ARHGAP42	1.54e-07
754	VSIR	1.54e-07
755	SLC19A2	1.48e-07
756	VNN1	1.45e-07
757	CD200	1.43e-07
758	CRYM	1.43e-07
759	NCAM2	1.43e-07
760	OPLAH	1.43e-07
761	SARM1	1.43e-07
762	SLC13A4	1.43e-07
763	ADAM11	1.42e-07
764	DNASE2	1.42e-07
765	MCF2L	1.42e-07
766	S100PBP	1.42e-07
767	SEZ6	1.42e-07
768	ST3GAL3	1.42e-07
769	ROMO1	1.42e-07
770	NEURL3	1.38e-07
771	PHLDA2	1.35e-07
772	ENTPD7	1.35e-07
773	KMO	1.33e-07
774	CRYL1	1.31e-07
775	FUT4	1.28e-07
776	MICAL3	1.28e-07
777	ATP10A	1.28e-07
778	CEMIP	1.28e-07
779	ANKRD22	1.27e-07
780	CMPK2	1.24e-07
781	APOL5	1.24e-07
782	CA3	1.24e-07
783	FMO5	1.24e-07
784	UNC5A	1.24e-07
785	UNC5D	1.24e-07
786	ZP2	1.24e-07
787	GPBAR1	1.18e-07
788	HERC6	1.17e-07
789	METTL7B	1.07e-07
790	RTN4RL1	1.07e-07
791	ARRDC2	1.07e-07
792	CAND2	1.07e-07
793	CES4A	1.07e-07
794	NR2C2AP	1.07e-07
795	PRR32	1.07e-07
796	RASGEF1B	1.07e-07
797	RHPN1	1.07e-07
798	SLC13A5	1.07e-07
799	SRRD	1.07e-07
800	TRHDE	1.07e-07
801	TSPAN12	1.07e-07
802	LILRB3	1.06e-07
803	MPPED1	1.06e-07
804	GRIA3	1.05e-07
805	SDHAF1	1.04e-07
806	STX1B	1.04e-07
807	CPNE4	1.03e-07
808	TEF	1.01e-07
809	CHPF	1.01e-07
810	CSMD1	9.85e-08
811	ANKEF1	9.76e-08
812	LRRC4C	9.33e-08
813	DPP6	9.09e-08
814	SULT4A1	8.93e-08
815	SDS	8.84e-08
816	KCNJ3	8.83e-08
817	GALT	8.72e-08
818	SULT1E1	8.72e-08
819	CLDN23	8.49e-08
820	MS4A6E	8.3e-08
821	ENC1	8.16e-08
822	CYP7B1	7.74e-08
823	NAA11	7.72e-08
824	SLC30A3	7.71e-08
825	CCDC127	7.21e-08
826	BOC	7.1e-08
827	PITPNM3	6.96e-08
828	JADE2	6.7e-08
829	CDH17	6.68e-08
830	ST8SIA1	6.09e-08
831	CLIC2	6.05e-08
832	CD7	6.03e-08
833	AMDHD1	5.85e-08
834	PPM1K	5.76e-08
835	TENT4A	5.71e-08
836	POPDC2	5.54e-08
837	PARPBP	5.49e-08
838	INSYN1	5.35e-08
839	NKG7	5.09e-08
840	SULT1C2	4.54e-08
841	ST8SIA3	4.06e-08
842	POU3F1	4.03e-08
843	SLC2A5	4.02e-08
844	FFAR4	3.65e-08
845	MC4R	3.64e-08
846	IL17RE	3.52e-08
847	BMERB1	3.4e-08
848	PKD1L2	3.16e-08
849	SERINC5	3.16e-08
850	P2RX5	2.58e-08
851	HGD	2.34e-08
852	DUSP26	2.13e-08
853	GLT1D1	2.04e-08
854	ACSM5	1.23e-08
855	JMY	1.03e-08
856	VXN	9.69e-09
857	GRIP2	4.19e-09
858	ATRNL1	3.64e-09
